# Supplementary material
Source: Research Square preprint supplement (doi:10.21203/rs.3.rs-9546695/v1)
Supplement: Supplementary file 1 [file 72461587b4eccd0986f485e7.xlsx]

## Sheet: TableS1
Table S1. Long-read sequences supporting the linkage between contigs of the mitochondrial genome.
Query name	Target name	Identity (%)	Alignment length	Mismatch	Gap open	Query start	Query end	Target start	Target end	E-value	Score
ctg2(+)>ctg4(+)	1da2b9a0-e0af-47ee-a7c1-3d02b8a98fcf	99.401	4010	6	11	1	4000	7866	11867	0	7256
ctg2(+)>ctg4(+)	2fd20ee6-adcf-40b4-a0ca-51678a675fcb	99.301	4005	13	14	1	4000	3411	7405	0	7227
ctg2(+)>ctg4(+)	28d44a9f-c30c-4e5e-b173-4764181e388b	99.326	4003	8	15	1	4000	8993	12979	0	7225
ctg2(+)>ctg4(+)	e23446ed-6077-4631-9a04-12db5c15f05f	99.252	4011	7	18	1	4000	3616	7614	0	7219
ctg2(+)>ctg4(+)	7f99b9b5-316b-4cf7-ab1a-4b6bbc8013d2	99.251	4006	9	16	1	4000	20471	16481	0	7212
ctg2(+)>ctg4(+)	35937cfc-f5cc-4c65-9c05-8a7b59d5714f	99.226	4007	11	12	1	4000	5343	9336	0	7210
ctg2(+)>ctg4(+)	ea638194-39ef-47ce-91d1-1ed4dbe93142	99.153	4012	11	20	1	4000	30655	34655	0	7199
ctg2(+)>ctg4(+)	4abb652d-cd57-4075-8b00-dfbe6ea09b84	99.176	4006	5	18	1	4000	3986	7969	0	7190
ctg2(+)>ctg4(+)	a85fb527-ef30-4fd5-b839-45e3dbca43a7	99.101	4006	18	15	1	4000	1372	5365	0	7182
ctg2(+)>ctg4(+)	bf8d2995-2efc-4fb9-aa3c-686910183250	99.102	4009	10	20	1	4000	7335	11326	0	7180
ctg2(+)>ctg4(+)	b054b380-cb5c-48c1-beaf-9e384c7f846d	99.054	4016	7	23	1	4000	10376	14376	0	7177
ctg2(+)>ctg4(+)	2eaa651e-c412-4e5c-b4ea-d09377db7e9c	99.053	4013	11	23	1	4000	6268	10266	0	7175
ctg2(+)>ctg4(+)	c8746142-8059-4299-bf9f-47f04f8d9f58	99.053	4011	11	21	1	4000	25431	21437	0	7171
ctg2(+)>ctg4(+)	f9906135-6994-4188-bb28-6d39d6c8cebd	99.053	4011	10	22	1	4000	21696	25689	0	7171
ctg2(+)>ctg4(+)	f2c7212d-1578-4a8c-8d3e-6640112be579	99.003	4011	19	14	1	4000	10835	6835	0	7166
ctg2(+)>ctg4(+)	f234459f-34ed-419b-849c-2d5243bed2a9	99.076	4004	9	16	1	4000	4481	8460	0	7164
ctg2(+)>ctg4(+)	b1d2ba53-f4f4-4cdc-a1c1-1b1691de8f97	98.953	4010	18	22	1	4000	6541	2546	0	7151
ctg2(+)>ctg4(+)	33c49348-3313-4fe1-ab06-755a8e80b504	98.952	4006	23	15	1	4000	7518	3526	0	7147
ctg2(+)>ctg4(+)	66d51188-50e7-4fc3-aa16-bd0bc8b5bb04	98.928	4010	19	21	1	4000	1474	5469	0	7145
ctg2(+)>ctg4(+)	aeaf1454-9d17-4985-b0fe-80d69d639f9a	98.878	4011	21	22	1	4000	13771	17768	0	7136
ctg2(+)>ctg4(+)	ed08e35f-7d05-4cdc-bbff-35b633289c7b	98.927	4006	15	25	1	4000	3853	7836	0	7134
ctg2(+)>ctg4(+)	af3da88d-d117-43a9-9562-90a5f5da7459	98.853	4012	18	25	1	4000	47908	43913	0	7129
ctg2(+)>ctg4(+)	e348df14-651f-449e-8735-ca4839b72435	98.926	4005	9	23	1	4000	32599	36574	0	7127
ctg2(+)>ctg4(+)	3d8b4c3d-fb95-4c4b-afb0-8b96e69375b0	98.83	4016	15	22	1	4000	17908	21907	0	7127
ctg2(+)>ctg4(+)	87e7d227-433e-4a98-a7e3-14a49a72e408	98.853	4010	19	22	1	4000	14275	18267	0	7125
ctg2(+)>ctg4(+)	9172ca4c-6bdc-4a3e-94e6-83d7354849d0	98.828	4011	13	30	1	4000	33205	37192	0	7116
ctg2(+)>ctg4(+)	60e903b6-9a26-4610-a0d3-135139f6db01	98.851	4004	21	19	1	4000	6756	2774	0	7116
ctg2(+)>ctg4(+)	c57ad87f-c28d-46e4-aa34-daf78463cec8	98.827	4007	19	25	1	4000	2792	6777	0	7114
ctg2(+)>ctg4(+)	427cf3f5-2fdb-4fbb-919a-9633e52dbf17	98.804	4012	16	25	1	4000	26736	22745	0	7114
ctg2(+)>ctg4(+)	9de29619-9446-4853-b25b-fc6639a8a1ee	98.802	4006	22	24	1	4000	5164	9149	0	7108
ctg2(+)>ctg4(+)	f3f904d4-e4cc-40f2-8f2e-3cfe2e93762c	98.803	4009	15	25	1	4000	11493	15477	0	7107
ctg2(+)>ctg4(+)	db32e422-823d-497c-adf7-2d5480ea1c5b	98.754	4012	23	19	1	4000	9061	5065	0	7107
ctg2(+)>ctg4(+)	ce506145-3943-441c-90f1-4d0f5dbcbea1	98.778	4009	18	24	1	4000	36676	32690	0	7103
ctg2(+)>ctg4(+)	6919778d-215d-48cb-a5e8-0cfd39d8a2b0	98.729	4013	22	25	1	4000	4465	469	0	7101
ctg2(+)>ctg4(+)	1759b55f-3fe8-48f2-a145-339e932f5242	98.754	4012	13	25	1	4000	702	4688	0	7097
ctg2(+)>ctg4(+)	1d8d53d2-5560-41fb-9c51-9b6437ebab3d	98.753	4011	15	30	1	4000	1526	5512	0	7097
ctg2(+)>ctg4(+)	c11b4dc1-d9f7-401b-9a81-2e5d52f5772d	98.681	4019	17	28	1	4000	10511	14512	0	7095
ctg2(+)>ctg4(+)	640bf365-5d6e-40c1-be05-00439c76ccb8	98.656	4019	21	24	1	4000	4332	8336	0	7092
ctg2(+)>ctg4(+)	5050b468-6b22-490d-966f-060bce2f7fdb	98.704	4013	12	29	1	4000	967	4952	0	7086
ctg2(+)>ctg4(+)	0841ce8e-9a1b-4fd8-b59d-3a352e6fac9b	98.678	4009	27	23	1	4000	6174	2183	0	7086
ctg2(+)>ctg4(+)	f7711b84-de2e-4b63-83b9-7f799a74ad18	98.631	4018	23	23	1	4000	1475	5478	0	7086
ctg2(+)>ctg4(+)	b98349f6-7a60-4455-a529-62739ad9428d	98.679	4011	19	25	1	4000	4463	476	0	7083
ctg2(+)>ctg4(+)	2fdff1c3-d71b-4bb5-8ec4-262481a97cdb	98.629	4012	27	25	1	4000	10442	6447	0	7079
ctg2(+)>ctg4(+)	ec3b8b4f-4a22-4336-9094-8ba8ca42e5c6	98.63	4015	21	28	1	4000	403	4398	0	7079
ctg2(+)>ctg4(+)	7538a133-f141-4837-9cc5-bf25272b6e5f	98.653	4009	27	24	1	4000	10689	14679	0	7079
ctg2(+)>ctg4(+)	a2c84c36-1461-4e55-a213-7252fe3d4dbe	98.653	4008	24	19	1	4000	19651	23636	0	7075
ctg2(+)>ctg4(+)	41be5e03-1d14-4ae1-9444-8f7aa5d18bf5	98.629	4012	22	23	1	4000	27919	23929	0	7073
ctg2(+)>ctg4(+)	d94483aa-13dd-450a-908e-146827755616	98.557	4020	22	24	1	4000	11970	15973	0	7070
ctg2(+)>ctg4(+)	4f4a7680-66ca-4ade-82eb-719016ce32db	98.556	4018	25	24	1	4000	18628	14626	0	7068
ctg2(+)>ctg4(+)	d00c6247-a930-4ba9-be0f-bfc88e04c26e	98.557	4020	21	25	1	4000	10769	14771	0	7068
ctg2(+)>ctg4(+)	5ccd24e3-2087-4f32-af1c-5f2dcc6da778	98.604	4011	24	28	1	4000	30402	26413	0	7068
ctg2(+)>ctg4(+)	3aa912f6-62ab-4590-b665-391ec966c88d	98.628	4010	16	27	1	4000	35086	31106	0	7064
ctg2(+)>ctg4(+)	0a823635-ac44-4688-9b4f-d8c017d64441	98.554	4010	27	23	1	4000	9263	5275	0	7055
ctg2(+)>ctg4(+)	605c71dc-746d-4177-95d9-8ca832bc89b8	98.554	4010	25	24	1	4000	516	4502	0	7053
ctg2(+)>ctg4(+)	bd185a0e-ca6b-4b9c-a7cc-296f17406b75	98.556	4016	10	31	1	4000	3013	6996	0	7051
ctg2(+)>ctg4(+)	4c9fb86b-b54f-4295-827e-55d1df50dd17	98.507	4020	14	32	1	4000	4645	652	0	7049
ctg2(+)>ctg4(+)	97197ff5-47e4-4ee5-ba50-0a1ea3802998	98.481	4017	24	31	1	4000	25512	21516	0	7046
ctg2(+)>ctg4(+)	b195f02c-9921-4152-a573-3fbbd756c7cf	98.457	4017	24	34	1	4000	8158	4163	0	7040
ctg2(+)>ctg4(+)	5c04c728-42f4-47c0-80b2-b5981c4fceb0	98.552	4005	16	26	1	4000	8607	12574	0	7036
ctg2(+)>ctg4(+)	343feece-81e4-4a56-8dee-334ea66346cd	98.48	4013	18	25	1	4000	24643	20661	0	7033
ctg2(+)>ctg4(+)	f65cc87f-60b6-47ad-b77c-0bed714e91e9	98.479	4010	21	29	1	4000	12615	8636	0	7031
ctg2(+)>ctg4(+)	0e57f127-9cf3-4f2b-8f30-dcc105c2e11a	98.455	4012	24	32	1	4000	35306	39291	0	7031
ctg2(+)>ctg4(+)	36dba088-ca16-4486-b7be-0f7df67f1a52	98.453	4008	31	27	1	4000	6100	2116	0	7029
ctg2(+)>ctg4(+)	770b74e3-b443-4220-97a0-7b100af20770	98.43	4012	29	21	1	4000	7878	3889	0	7029
ctg2(+)>ctg4(+)	4d31013e-d88f-42f3-a700-0d87df8039da	98.478	4008	24	26	1	4000	11121	15099	0	7029
ctg2(+)>ctg4(+)	5d786dc8-d41d-4ab5-acb6-91bcfc00e817	98.479	4010	14	25	1	4000	7988	11960	0	7023
ctg2(+)>ctg4(+)	87f5c95d-1dc6-4569-9699-6871eabcc1c3	98.381	4016	30	27	1	4000	5053	1057	0	7023
ctg2(+)>ctg4(+)	bb6c7760-e2fc-4317-ac9e-1bcc33b8c303	98.357	4016	35	29	1	4000	6189	2189	0	7022
ctg2(+)>ctg4(+)	9e4698cc-9263-4bb0-a401-2d2faece56c0	98.406	4014	18	29	1	4000	579	4560	0	7016
ctg2(+)>ctg4(+)	fc8a30a7-6b89-49da-bb93-bd608caf4da0	98.428	4008	21	26	1	4000	7324	3351	0	7014
ctg2(+)>ctg4(+)	c59a9444-6f4f-411c-ab2d-2581633704ca	98.33	4012	30	27	1	4000	30800	26814	0	7003
ctg2(+)>ctg4(+)	e4eb16e0-82da-41cd-a8f4-162b0e95be31	98.257	4017	27	36	1	4000	6247	2257	0	6990
ctg2(+)>ctg4(+)	ab0e0936-d9ee-4d10-aa12-64ef35487995	98.303	4008	31	29	1	4000	4569	591	0	6990
ctg2(+)>ctg4(+)	5dd0cc63-6e51-4ace-8605-5571a2df2ff0	98.233	4017	25	31	1	4000	9350	13337	0	6983
ctg2(+)>ctg4(+)	373a23e1-331d-4cec-a52f-85d115a3e0b2	98.254	4009	32	27	1	4000	26824	22845	0	6981
ctg2(+)>ctg4(+)	1c3b19e3-6629-4c9d-8359-ae8deb1d2fce	98.256	4013	17	33	1	4000	42144	38172	0	6974
ctg2(+)>ctg4(+)	e7f27aeb-3436-44a8-ac17-a256b5eb4fa6	98.181	4013	33	31	1	4000	33257	29272	0	6970
ctg2(+)>ctg4(+)	f5dbf0bb-f197-498a-8fe0-e83eb4d5dc1e	98.11	4022	30	35	1	4000	60634	64631	0	6964
ctg2(+)>ctg4(+)	9825eee7-835a-4bfc-94fd-0244e8e396d1	98.182	4015	21	33	1	4000	38702	34725	0	6962
ctg2(+)>ctg4(+)	e805434c-03c7-4928-b73b-b8abe476d987	98.109	4019	30	34	1	4000	7682	11673	0	6959
ctg2(+)>ctg4(+)	e564e0c2-c43f-49c6-af92-9acfa3465672	98.134	4019	22	29	1	4000	17666	21650	0	6957
ctg2(+)>ctg4(+)	0d192b06-5d29-4a08-9286-7d6197e981ca	98.108	4017	30	39	1	4000	23861	27848	0	6955
ctg2(+)>ctg4(+)	6d183ce7-a8a4-4d9f-8eb3-1ed1a9f3477b	98.104	4009	35	35	1	4000	17014	13038	0	6944
ctg2(+)>ctg4(+)	95b9b9e9-c5ff-4fd2-a811-1324e6983c56	98.059	4018	29	37	1	4000	13376	9390	0	6942
ctg2(+)>ctg4(+)	58e8caaa-f4c3-4168-b46b-b474ace08e52	98.079	4008	35	31	1	4000	10751	6778	0	6937
ctg2(+)>ctg4(+)	88e3c399-584c-42ed-b103-17cdb95a56d7	98.03	4011	33	38	1	4000	6147	10122	0	6927
ctg2(+)>ctg4(+)	53081579-dbde-4154-a3c3-e66e43dcdc42	98.005	4010	39	27	1	4000	6977	10955	0	6924
ctg2(+)>ctg4(+)	b9e3be70-9a16-4576-9200-b65df19bddbd	97.957	4014	29	43	1	4000	17636	13662	0	6909
ctg2(+)>ctg4(+)	5b485146-25dd-4dc6-b123-f9852f5e3bed	97.864	4027	28	45	1	4000	19494	15499	0	6907
ctg2(+)>ctg4(+)	a4cb0834-28e8-495a-a216-ac0d77a3ae45	97.934	4018	20	42	1	4000	4841	869	0	6902
ctg2(+)>ctg4(+)	41881d4b-1dad-4a00-a0e3-f9eef46e77b1	97.835	4018	32	43	1	4000	28064	24084	0	6887
ctg2(+)>ctg4(+)	9070ecbe-1152-4585-b713-c184b773eef9	97.778	4006	45	36	1	4000	20807	16840	0	6865
ctg2(+)>ctg4(+)	de577920-16da-4e7b-9dbc-86e2dabcfb00	97.71	4017	33	39	1	4000	43876	39902	0	6854
ctg2(+)>ctg4(+)	4be914f2-b94c-4d98-9de7-a8b46bfff8f5	97.634	4015	44	44	1	4000	7214	11192	0	6841
ctg2(+)>ctg4(+)	e0aec8f6-8e6c-448b-9630-f839702c9832	97.613	4021	37	45	1	4000	21459	17477	0	6839
ctg2(+)>ctg4(+)	49edfbac-3795-4de6-aaea-6fb952bdd352	97.514	4022	28	46	1	4000	4026	7997	0	6807
ctg2(+)>ctg4(+)	3247d8e7-b314-4aec-8e7f-50e38e3857a0	97.558	4013	30	52	1	4000	12003	15960	0	6806
ctg2(+)>ctg4(+)	a6cd31e5-dc1a-4122-9961-7a8620ff18ee	97.419	4029	37	54	1	4000	19002	15012	0	6802
ctg2(+)>ctg4(+)	5ea01e84-2571-42ca-86fc-df0376723ce4	97.486	4017	37	51	1	4000	7472	11441	0	6800
ctg2(+)>ctg4(+)	3e7c016f-a19f-459b-bf8c-76dd29ffff27	97.437	4019	31	51	1	4000	5026	8991	0	6785
ctg2(+)>ctg4(+)	8e29f4aa-c92f-4d97-b876-79094246b358	97.36	4015	52	46	1	4000	6781	2806	0	6778
ctg2(+)>ctg4(+)	842b93dc-9c69-416e-a121-8f008bbe6099	97.316	4024	30	51	1	4000	12416	16385	0	6761
ctg2(+)>ctg4(+)	ad5ee91c-dafa-4e2a-9682-785c6451f092	97.264	4021	46	41	1	4000	10612	14589	0	6758
ctg2(+)>ctg4(+)	922d9d75-c4b9-4be7-89b7-130a9cfc666b	97.162	4017	52	42	1	4000	8843	12814	0	6730
ctg2(+)>ctg4(+)	de57595c-f6e1-41cc-ac1d-082037695a00	97.159	4012	56	42	1	4000	17562	13597	0	6724
ctg2(+)>ctg4(+)	ccd6332a-fd16-41d9-81d0-1ece8e36021b	97.071	4029	33	57	1	4000	14669	18641	0	6708
ctg2(+)>ctg4(+)	4052eab5-fba9-498d-a9d7-ef15b9aef0e9	97.11	4014	44	52	1	4000	10068	14023	0	6704
ctg2(+)>ctg4(+)	b228114e-01cf-4421-aff1-c75a27630191	97.062	4016	49	54	1	4000	10000	13962	0	6698
ctg2(+)>ctg4(+)	0503f675-82d2-47d5-8dc8-5d86b008a21e	97.039	4019	38	51	1	4000	10592	6636	0	6687
ctg2(+)>ctg4(+)	2fd5a8bf-a639-4073-9470-910a4f4d70ae	96.849	4030	53	57	1	4000	3738	7723	0	6671
ctg2(+)>ctg4(+)	b34ecce2-6797-406a-9b7a-53fdfddfea92	96.818	4023	48	58	1	4000	5137	1172	0	6647
ctg2(+)>ctg4(+)	2c775a9b-78dd-40ce-bb34-2d6cf81b7d8d	96.81	4012	65	49	1	4000	17	3977	0	6641
ctg2(+)>ctg4(+)	71ecc8cc-38ac-47b9-9ee1-6948090fdd21	96.711	4013	60	50	1	4000	5812	1859	0	6613
ctg2(+)>ctg4(+)	57836848-7704-4fff-8e23-33c3e5b6a62d	96.501	4030	63	56	1	4000	13886	17867	0	6589
ctg2(+)>ctg4(+)	2f05c154-7707-415c-9389-e6ddb6b37fcd	95.878	4027	79	65	1	4000	35779	31813	0	6436
ctg2(+)>ctg4(+)	9074cb91-4980-402f-a0e5-48b2a1b3da71	94.958	4026	88	84	1	4000	7053	3117	0	6204
ctg2(+)>ctg4(+)	e3b2ee94-6549-40db-98be-448f82b8d01f	94.131	4038	106	85	1	4000	11687	15631	0	6023
ctg2(+)>ctg4(+)	de343e3a-ace2-48bc-a80d-7c8b30a459b3	93.877	4050	123	92	1	4000	13005	9031	0	5989
ctg2(+)>ctg4(+)	3f099042-0d5f-43bf-afbb-1f85cc0d0dcf	91.785	4029	177	115	1	4000	15189	11286	0	5465
ctg4(+)>ctg3(+)	7abed3bb-8256-4452-94f6-db370659724b	99.5	4003	10	8	1	4000	4303	308	0	7273
ctg4(+)>ctg3(+)	f49ed056-7648-4e96-9bcb-1176372e30e3	99.277	4010	9	14	1	4000	36433	40432	0	7227
ctg4(+)>ctg3(+)	ec985322-5f22-46b7-8bd3-2ee802496f08	99.251	4008	13	15	1	4000	34973	30975	0	7219
ctg4(+)>ctg3(+)	5f90940a-654c-4547-ac1a-75ffa659de60	99.3	4002	6	13	1	4000	16593	20574	0	7215
ctg4(+)>ctg3(+)	95f3579f-995d-453f-bb09-ad864adf26d2	99.226	4006	17	12	1	4000	24370	20373	0	7214
ctg4(+)>ctg3(+)	b034f1a9-8c2e-4334-9ca2-a6eabb8f5450	99.251	4005	9	14	1	4000	3426	7414	0	7210
ctg4(+)>ctg3(+)	3063b2b0-f6d2-4178-9977-60fc83e00451	99.226	4006	12	15	1	4000	4411	8403	0	7208
ctg4(+)>ctg3(+)	9f4a0bde-e1cd-4d7d-806b-4d3eff227543	99.153	4015	13	12	1	4000	17534	13526	0	7206
ctg4(+)>ctg3(+)	ca6318eb-97d0-4e59-9663-ffd6849188c6	99.201	4007	15	15	1	4000	13487	17483	0	7206
ctg4(+)>ctg3(+)	089fb2ad-7624-439e-8de5-4714858e0e7c	99.201	4004	17	13	1	4000	6626	2634	0	7203
ctg4(+)>ctg3(+)	aeaefb23-9a79-4252-85e1-2def2628f84c	99.201	4005	11	20	1	4000	18046	14058	0	7199
ctg4(+)>ctg3(+)	e1217968-c007-4947-812a-c9e8fd94dd86	99.127	4008	17	14	1	4000	12117	16114	0	7191
ctg4(+)>ctg3(+)	8f906393-6f80-47a3-b81b-0ba7eb2195dc	99.127	4010	11	20	1	4000	14432	18427	0	7190
ctg4(+)>ctg3(+)	730c4d2c-687c-4f39-9eae-53b0af69d9c1	99.102	4011	6	25	1	4000	6752	2761	0	7180
ctg4(+)>ctg3(+)	bf2bafd8-3779-4e2f-a237-851973e40104	99.029	4015	13	22	1	4000	9221	5218	0	7175
ctg4(+)>ctg3(+)	c88418d0-06b7-480f-a360-d74b797ceb16	99.052	4008	15	22	1	4000	331	4323	0	7169
ctg4(+)>ctg3(+)	7605b7ed-1eff-409e-8eda-12894753b29a	99.052	4008	13	18	1	4000	6156	2166	0	7167
ctg4(+)>ctg3(+)	5598378c-3346-4137-94da-bcf7ebdb004a	99.028	4011	6	25	1	4000	52040	48052	0	7160
ctg4(+)>ctg3(+)	e64d0026-e23a-449a-abbe-6cee44a85269	98.978	4012	14	22	1	4000	30341	26345	0	7156
ctg4(+)>ctg3(+)	339cedff-5fe1-4bc3-ab0d-c281e75e5a35	99.002	4007	17	19	1	4000	18475	14485	0	7156
ctg4(+)>ctg3(+)	9376c034-faf9-477f-87e6-106198138d22	99.001	4003	18	15	1	4000	2619	6602	0	7151
ctg4(+)>ctg3(+)	ccefa641-cb13-4775-aa72-4fe77dcc50f2	98.952	4008	19	20	1	4000	6149	2157	0	7147
ctg4(+)>ctg3(+)	605bb2a2-3d8e-4c29-866d-9ebeca3858a3	98.952	4009	12	22	1	4000	4212	225	0	7143
ctg4(+)>ctg3(+)	93cd9d49-aedb-4dd8-87db-d7b0f9c6b2b7	98.927	4007	18	18	1	4000	22985	26973	0	7138
ctg4(+)>ctg3(+)	c091f2c9-3cb3-4967-9794-5775551e5707	98.855	4018	12	28	1	4000	10558	14559	0	7134
ctg4(+)>ctg3(+)	f0ec5409-85fa-4811-a5f9-a50834e40457	98.902	4009	15	26	1	4000	9595	5607	0	7132
ctg4(+)>ctg3(+)	c5d81c52-ba69-4962-9aad-d19a7ed2d333	98.927	4007	12	25	1	4000	23921	19939	0	7132
ctg4(+)>ctg3(+)	bfc2d108-11e6-4294-b4f6-55ba6bc4f4af	98.803	4010	24	22	1	4000	16117	12122	0	7118
ctg4(+)>ctg3(+)	e431156f-e24d-4601-a8b0-b50ca3a69387	98.827	4008	21	17	1	4000	8258	12247	0	7118
ctg4(+)>ctg3(+)	cd17995c-b48d-47c1-bdd1-afdb6305b36b	98.803	4010	19	24	1	4000	27304	23314	0	7112
ctg4(+)>ctg3(+)	a65dd519-ac58-496a-8f51-bc7bc2b33f1b	98.779	4013	17	24	1	4000	8065	4072	0	7110
ctg4(+)>ctg3(+)	05cb01d5-4c4f-4f08-9883-c3611bf7dced	98.827	4007	14	21	1	4000	35756	39736	0	7108
ctg4(+)>ctg3(+)	d5e83a4d-5d09-4a80-9653-ddf01a8eff75	98.779	4013	12	29	1	4000	10571	6583	0	7105
ctg4(+)>ctg3(+)	9eab9b6c-62ae-4ca9-93e6-ef8ae81b8027	98.777	4005	26	20	1	4000	10389	14375	0	7103
ctg4(+)>ctg3(+)	75c5891f-ed4a-429c-823e-f2555ec178ca	98.753	4011	14	23	1	4000	377	4362	0	7097
ctg4(+)>ctg3(+)	da6a4ed2-d0d6-458c-a833-b8de88efa1f9	98.728	4011	17	26	1	4000	17707	13720	0	7094
ctg4(+)>ctg3(+)	57891e53-6c72-41a2-b562-13d460c78759	98.702	4006	23	19	1	4000	17998	14016	0	7083
ctg4(+)>ctg3(+)	85477503-9425-4afa-b6c5-ed22269dfef8	98.726	4004	17	24	1	4000	8914	12887	0	7081
ctg4(+)>ctg3(+)	dc68d9a3-371c-4734-90d3-3dd7c5d1608d	98.629	4011	21	24	1	4000	18410	22397	0	7071
ctg4(+)>ctg3(+)	b8f83e6c-1818-4840-949b-f43634ce7480	98.556	4018	27	27	1	4000	14421	18425	0	7070
ctg4(+)>ctg3(+)	1a4f20e5-2460-46d4-a9a5-0d91da397b45	98.58	4015	22	27	1	4000	15250	19244	0	7066
ctg4(+)>ctg3(+)	619875bc-7ac9-4b94-b20c-798205420d02	98.626	4004	25	24	1	4000	18865	14888	0	7062
ctg4(+)>ctg3(+)	64fdb58f-3f9c-4ef9-a51a-289580bbbe59	98.605	4015	11	30	1	4000	8027	12011	0	7062
ctg4(+)>ctg3(+)	2545518d-7e17-476d-aa12-86e90bf0c953	98.554	4012	26	29	1	4000	59066	55075	0	7059
ctg4(+)>ctg3(+)	d1d9f7df-e4a1-4de2-9251-bf7c8a7498fe	98.554	4012	25	26	1	4000	1296	5286	0	7057
ctg4(+)>ctg3(+)	90a5a7cc-c515-44cd-94b5-6be8a87c955f	98.505	4014	25	30	1	4000	11491	7499	0	7047
ctg4(+)>ctg3(+)	3c918db6-04a0-403c-a77e-b3811a52ed3c	98.529	4011	17	24	1	4000	29906	25927	0	7042
ctg4(+)>ctg3(+)	43704e70-d81d-4a0d-b333-10f055bf4746	98.481	4016	21	26	1	4000	5996	2005	0	7042
ctg4(+)>ctg3(+)	a6193107-7e9c-4fa4-ac2c-42b6687592ab	98.504	4010	25	23	1	4000	7471	3487	0	7040
ctg4(+)>ctg3(+)	95ea0d43-77d9-4f72-b2a1-088ad4bafc55	98.502	4005	33	20	1	4000	4863	881	0	7038
ctg4(+)>ctg3(+)	c27c9c9d-4dc9-4700-a65e-08c0d77013ad	98.407	4018	28	29	1	4000	22628	18629	0	7033
ctg4(+)>ctg3(+)	0e915c07-64a3-4265-8727-8969382f3bb0	98.453	4009	32	23	1	4000	23842	19855	0	7033
ctg4(+)>ctg3(+)	e49cff63-1bcb-44c9-b371-3b8f82acbd0a	98.429	4011	34	25	1	4000	13329	9337	0	7031
ctg4(+)>ctg3(+)	8ff28e80-4c79-4e24-8c3c-bac17706b818	98.381	4016	25	36	1	4000	16986	12995	0	7020
ctg4(+)>ctg3(+)	ae80e6d6-5373-49a8-b26c-f087ff9d7b36	98.405	4013	18	32	1	4000	11998	8019	0	7014
ctg4(+)>ctg3(+)	d409c04a-2a04-46b4-a890-6fa21f301d44	98.38	4013	25	30	1	4000	6791	2806	0	7014
ctg4(+)>ctg3(+)	28c2a410-e931-4215-803f-2a6c55395540	98.381	4015	20	33	1	4000	927	4911	0	7012
ctg4(+)>ctg3(+)	56b33473-3a33-43c1-98b7-17c2aaab02f1	98.428	4007	20	31	1	4000	14362	10392	0	7011
ctg4(+)>ctg3(+)	d8adc66e-42c3-41db-9d2c-12e753b8169a	98.333	4019	22	31	1	4000	10027	14019	0	7009
ctg4(+)>ctg3(+)	4191f569-7d2e-4479-93d3-7ed85bd7d3ee	98.357	4016	19	37	1	4000	4219	8203	0	7007
ctg4(+)>ctg3(+)	17b56afe-e175-49bb-80f6-7751d5696952	98.355	4013	23	31	1	4000	8115	4133	0	7005
ctg4(+)>ctg3(+)	fd023ad5-f050-46ba-9a9e-4b11e64af410	98.378	4007	25	23	1	4000	14474	10501	0	7003
ctg4(+)>ctg3(+)	23240749-51dd-4dc7-bc83-fad57710a926	98.259	4020	26	30	1	4000	4507	512	0	6996
ctg4(+)>ctg3(+)	5f4bf18a-d821-4dcb-9195-7c847ba2026b	98.233	4019	31	32	1	4000	32984	36981	0	6992
ctg4(+)>ctg3(+)	c90e5d59-bf70-4cbc-b304-0045ade8929a	98.28	4012	30	34	1	4000	5882	1898	0	6990
ctg4(+)>ctg3(+)	70165ae3-7d7d-4e3e-b861-c53911966d3d	98.234	4021	24	36	1	4000	13022	17016	0	6988
ctg4(+)>ctg3(+)	26cd8cd8-708c-4ea6-9faa-259846159ec3	98.233	4017	25	33	1	4000	8782	12769	0	6983
ctg4(+)>ctg3(+)	ead2432d-656b-4e53-a167-98c082d76a96	98.183	4017	29	34	1	4000	19513	15524	0	6974
ctg4(+)>ctg3(+)	1c9d0937-f542-430a-bbe6-ebc5fbcdabbd	98.158	4018	28	33	1	4000	6211	10200	0	6968
ctg4(+)>ctg3(+)	c90f6e07-722e-465f-845a-e260a56fb407	98.158	4017	30	34	1	4000	3166	7155	0	6968
ctg4(+)>ctg3(+)	ebf2324e-86c2-4496-833a-22dc15fdc526	98.158	4017	25	39	1	4000	18626	14642	0	6962
ctg4(+)>ctg3(+)	90f9b6b2-d787-4c1c-9dd5-dfa7bb2a1669	98.155	4011	35	33	1	4000	7894	3912	0	6961
ctg4(+)>ctg3(+)	e7a8c23b-be34-4ece-a64f-1bffd555a8f2	98.178	4007	34	30	1	4000	7786	3812	0	6959
ctg4(+)>ctg3(+)	e861fcd3-0877-4b24-b7d1-cf685ac50a80	98.152	4005	39	21	1	4000	16406	20380	0	6953
ctg4(+)>ctg3(+)	b6749b5d-adf3-452b-89c7-4d52f03e3c88	98.132	4014	28	35	1	4000	1456	5436	0	6953
ctg4(+)>ctg3(+)	f25ecd90-7727-496f-9c4e-de7395354da6	98.131	4013	26	32	1	4000	39486	43462	0	6950
ctg4(+)>ctg3(+)	75c7d95c-9dda-493c-afbd-f234e2d03e83	98.108	4016	21	47	1	4000	5967	9943	0	6944
ctg4(+)>ctg3(+)	f52948d1-6e25-4d30-9ad8-6a0cae72d91f	98.035	4020	29	32	1	4000	1181	5170	0	6940
ctg4(+)>ctg3(+)	2fbf6ea5-83f5-4369-b177-ad60996724ea	98.056	4013	30	32	1	4000	646	4623	0	6935
ctg4(+)>ctg3(+)	625f95c0-d151-41ee-84cb-c7f4f2736d27	97.954	4008	40	31	1	4000	8186	12159	0	6909
ctg4(+)>ctg3(+)	d2202e71-19e5-4f85-800f-a301d6421dec	97.933	4016	24	34	1	4000	16363	20335	0	6902
ctg4(+)>ctg3(+)	78e63649-0ac8-4689-b757-1b0c4a793f27	97.88	4009	48	28	1	4000	14433	18413	0	6898
ctg4(+)>ctg3(+)	5239a8e3-b524-42cc-8ffd-f4f3292e3f8d	97.881	4012	39	38	1	4000	8941	4964	0	6896
ctg4(+)>ctg3(+)	59904a82-2ecf-439d-8b01-f393ee175cb7	97.792	4031	27	46	1	4000	25898	29897	0	6894
ctg4(+)>ctg3(+)	b19daff1-21a3-4bcd-bc8d-98d4e7636c77	97.763	4024	36	39	1	4000	4880	8873	0	6883
ctg4(+)>ctg3(+)	f2dda4bb-0f75-4356-b9fc-ee46706a5ad8	97.856	4011	33	46	1	4000	25989	22021	0	6881
ctg4(+)>ctg3(+)	205964db-77fb-4992-a454-9650c964a965	97.855	4009	35	40	1	4000	34393	30427	0	6879
ctg4(+)>ctg3(+)	6b01e907-fbae-43ec-926e-88b766e1fa0e	97.809	4016	30	40	1	4000	4953	980	0	6876
ctg4(+)>ctg3(+)	d67acdc9-5838-465a-ac4d-c6c2b8526fca	97.783	4015	39	39	1	4000	3267	7246	0	6876
ctg4(+)>ctg3(+)	c80aa83e-2457-48d4-840e-86f247068694	97.761	4019	35	36	1	4000	16561	12579	0	6872
ctg4(+)>ctg3(+)	8f64cc55-d077-478f-8266-e6a36e9970dd	97.734	4016	42	39	1	4000	4647	8629	0	6866
ctg4(+)>ctg3(+)	a46c1180-fa79-4886-8ef4-599987e7ae0b	97.756	4011	43	38	1	4000	7052	11026	0	6865
ctg4(+)>ctg3(+)	643ec9e7-f8a0-43ca-9d60-ced36d00c39a	97.66	4017	37	48	1	4000	11936	7960	0	6844
ctg4(+)>ctg3(+)	17f93c7f-f5e8-4e18-9589-9d9f0a6e1000	97.614	4023	31	44	1	4000	36978	40958	0	6837
ctg4(+)>ctg3(+)	1aa15450-9da6-4c31-9f2d-409f7b466bb3	97.56	4017	48	42	1	4000	45330	41347	0	6830
ctg4(+)>ctg3(+)	c48c24a3-c7af-475f-a77f-b44aef024e5e	97.584	4015	45	40	1	4000	7601	3624	0	6830
ctg4(+)>ctg3(+)	b29a7058-1008-4d12-83a1-6ce8821f8003	97.585	4016	36	47	1	4000	21677	17707	0	6822
ctg4(+)>ctg3(+)	7fdd9728-75cd-4a92-9e53-57495fd94d03	97.512	4020	40	35	1	4000	8810	4831	0	6815
ctg4(+)>ctg3(+)	8a2af7ea-fe3b-4b6b-9d75-f25a8c587a14	97.389	4021	46	45	1	4000	10197	14179	0	6789
ctg4(+)>ctg3(+)	65b57251-81ab-4a33-8cdb-2bbd209e596c	97.434	4014	40	45	1	4000	19798	23762	0	6783
ctg4(+)>ctg3(+)	adf55c30-0993-4d3c-b54f-8922ff61352b	97.34	4022	50	47	1	4000	22353	18367	0	6782
ctg4(+)>ctg3(+)	c1c34431-e112-4989-a86f-68032f6d7abc	97.406	4010	47	39	1	4000	4586	624	0	6776
ctg4(+)>ctg3(+)	ea817a0d-178a-417c-84f1-e8f108fa0cf5	97.289	4021	53	42	1	4000	14602	10617	0	6770
ctg4(+)>ctg3(+)	6485bd3b-c72a-40f8-a40f-aa4b763ab720	97.292	4025	42	43	1	4000	12074	8092	0	6767
ctg4(+)>ctg3(+)	d36c84b7-de3f-4468-b3a1-a62ce728913a	97.263	4019	39	45	1	4000	27335	23369	0	6746
ctg4(+)>ctg3(+)	c7d4a1f2-ccf8-4065-974f-acc023d843af	97.215	4022	45	46	1	4000	34222	38198	0	6745
ctg4(+)>ctg3(+)	3c9c290c-6055-4eb6-8867-3cf3c81eefc5	96.918	4024	62	44	1	4000	4919	8904	0	6687
ctg4(+)>ctg3(+)	9b03f1f6-f704-4f9d-8f91-0d0f23e48ebd	96.896	4027	40	66	1	4000	12312	8344	0	6665
ctg4(+)>ctg3(+)	7b4d8b36-de73-4946-935f-679cd0a9c753	96.909	4011	56	50	1	4000	5960	2007	0	6658
ctg4(+)>ctg3(+)	8ef1a56c-7723-44bb-8096-ce53de034e43	96.589	4016	48	52	1	4000	13032	9090	0	6575
ctg4(+)>ctg3(+)	4338be81-2d54-4ba9-9b9f-ed598035fa61	96.313	4041	56	69	1	4000	38710	34722	0	6551
ctg4(+)>ctg3(+)	779e963e-3374-44bc-868d-337fb00df482	96.246	4022	78	51	1	4000	5776	1806	0	6523
ctg4(+)>ctg3(+)	154dd3a6-cd40-41f2-8219-d90f83798ce3	96.083	4034	52	79	1	4000	4961	8922	0	6477
ctg4(+)>ctg3(+)	c88f67b5-3b1f-4f18-9509-738acc2ec62b	95.655	4051	61	83	1	4000	10684	14670	0	6399
ctg4(+)>ctg3(+)	77f80def-aaca-41ec-a435-feb4e2f6e16e	95.568	4039	78	78	1	4000	16881	12905	0	6373
ctg4(+)>ctg3(+)	388ea84d-64b1-47fc-b173-9c09c515fc66	95.165	4033	95	78	1	4000	1978	5943	0	6276
ctg4(+)>ctg3(+)	223d2eb1-6797-42e8-bc1c-d7b2b1e0f276	95.019	4035	94	85	1	4000	5588	9550	0	6239
ctg4(+)>ctg3(+)	86b69ca7-7bb5-4f26-8c39-80befb58632f	95.045	4036	74	97	1	4000	27489	31434	0	6229
ctg4(+)>ctg3(+)	67985bfa-0b1b-48f5-b2f8-8bb831b9ff85	94.134	4040	137	89	1	4000	6637	2658	0	6056
ctg4(+)>ctg3(+)	3aff68da-e102-418e-b37a-983ed6bce41f	91.255	4048	161	145	1	4000	4635	733	0	5336
ctg4(+)>ctg3(+)	fe3e7b5b-d8c1-475c-98f1-4e1d89b763d6	90.516	4070	178	166	1	4000	12602	8671	0	5186
ctg4(+)>ctg3(+)	ec12a125-5b20-44a8-bf0f-dbf78668aefb	90.375	4031	165	167	1	4000	26432	22594	0	5088
ctg4(+)>ctg3(+)	3aee00d7-8593-4d6b-a164-fd23feb5d886	89.098	4036	163	184	1	4000	5778	9572	0	4759
ctg4(+)>ctg2(+)	ed6b97df-6cf3-4d69-bf64-b1e74d2933cf	99.401	4007	7	14	1	4000	10115	6119	0	7251
ctg4(+)>ctg2(+)	e344a094-f5ef-4887-ab9f-dfe91f3fea26	99.351	4006	12	9	1	4000	24577	20580	0	7241
ctg4(+)>ctg2(+)	0ce04651-45a8-413a-89cd-646c59f30c6a	99.301	4005	9	14	1	4000	11023	15013	0	7223
ctg4(+)>ctg2(+)	98143b86-6efe-4c38-8704-6fc917a62bf6	99.252	4009	14	14	1	4000	22425	18424	0	7223
ctg4(+)>ctg2(+)	1594e312-54f6-4aee-977f-199d6d4544f9	99.251	4005	14	16	1	4000	19371	23364	0	7215
ctg4(+)>ctg2(+)	da6d1cf0-9fdc-45f6-bd93-033e01afd315	99.176	4007	10	18	1	4000	8740	12730	0	7195
ctg4(+)>ctg2(+)	0ac45b23-41d7-46a2-bffa-1e9da92303a6	99.077	4010	13	17	1	4000	776	4771	0	7179
ctg4(+)>ctg2(+)	06a9b9e7-a5fa-48d0-996f-69e998305edb	99.077	4008	18	16	1	4000	18218	14222	0	7179
ctg4(+)>ctg2(+)	37624b5c-a988-4bf5-9196-31120ec3fcaf	99.053	4011	14	15	1	4000	29715	25718	0	7175
ctg4(+)>ctg2(+)	c21649a4-8853-4ce7-90e0-21ff08d300c4	99.052	4008	16	20	1	4000	14350	10357	0	7171
ctg4(+)>ctg2(+)	f9c37371-97d9-483e-82e0-dbd09fe231b8	98.979	4016	15	20	1	4000	5602	1597	0	7166
ctg4(+)>ctg2(+)	8201a128-963b-40e2-94d5-84fd9a7be318	98.977	4008	22	15	1	4000	8839	4843	0	7156
ctg4(+)>ctg2(+)	7ce985ff-814c-42e3-b798-efb53da32f60	98.904	4013	17	24	1	4000	14099	10101	0	7142
ctg4(+)>ctg2(+)	25d5dbdd-531e-4d11-bc35-ee26bf5e759a	98.902	4006	22	20	1	4000	34415	30426	0	7134
ctg4(+)>ctg2(+)	fa8bab80-34b5-45ca-91f7-43ed4c42dfb9	98.878	4011	17	25	1	4000	27890	23897	0	7132
ctg4(+)>ctg2(+)	8cd664dd-e3c3-4192-91c1-9e51cbf40f6b	98.854	4015	14	25	1	4000	17403	13406	0	7131
ctg4(+)>ctg2(+)	cdc097ab-96ec-4574-ae7f-371aebb9cf70	98.853	4010	22	20	1	4000	12600	8605	0	7129
ctg4(+)>ctg2(+)	3426873d-3cca-4344-81a5-36acd5778576	98.878	4009	16	20	1	4000	1538	5526	0	7127
ctg4(+)>ctg2(+)	36b585ac-e2e0-4fc3-be88-804f7a1dc960	98.781	4019	18	22	1	4000	13148	9142	0	7121
ctg4(+)>ctg2(+)	d96ed6fb-6734-4ae9-b5df-d34af2ce4214	98.707	4023	16	26	1	4000	37737	33728	0	7108
ctg4(+)>ctg2(+)	2a6519e1-9c8b-4bf2-bd2d-9654cb2afbae	98.754	4014	20	24	1	4000	12305	8308	0	7108
ctg4(+)>ctg2(+)	1fc40c05-1b1e-4e7c-a558-7575655223c5	98.754	4014	20	24	1	4000	17822	21819	0	7108
ctg4(+)>ctg2(+)	af805bb8-44b5-4226-bafe-5dc24c7409b1	98.802	4007	20	19	1	4000	8070	12055	0	7108
ctg4(+)>ctg2(+)	92ea88dc-ead0-47b7-9a93-4dccc2669654	98.705	4015	19	30	1	4000	18215	22211	0	7095
ctg4(+)>ctg2(+)	11d90488-513a-4154-8611-5ba9ec489596	98.68	4014	20	26	1	4000	35306	39300	0	7088
ctg4(+)>ctg2(+)	bafa989a-899a-40ca-84ce-111ca5be936d	98.726	4002	29	17	1	4000	5028	1047	0	7088
ctg4(+)>ctg2(+)	27e7362e-f11b-4d2f-a364-6bee128d527a	98.606	4018	26	23	1	4000	9933	5928	0	7083
ctg4(+)>ctg2(+)	083de019-e971-4f0d-94f1-9f0317f10ab2	98.654	4013	23	27	1	4000	10003	6009	0	7083
ctg4(+)>ctg2(+)	31281e44-04c8-48f9-9a0e-98726e23f744	98.58	4015	30	23	1	4000	5063	1061	0	7073
ctg4(+)>ctg2(+)	e2e0454d-33bc-46b3-a613-b0f56072ee46	98.654	4011	14	31	1	4000	6804	2823	0	7071
ctg4(+)>ctg2(+)	e3882b3f-13b0-41a3-bdc0-9a643f685046	98.533	4021	19	34	1	4000	3376	7377	0	7062
ctg4(+)>ctg2(+)	d49ff655-7f65-4859-a5e8-358f935086c9	98.627	4007	17	33	1	4000	15647	19622	0	7060
ctg4(+)>ctg2(+)	043dfe0e-fedf-4a44-b903-d54a63ac8bb4	98.602	4007	25	24	1	4000	8908	4926	0	7060
ctg4(+)>ctg2(+)	e4bdb92d-13c6-44cb-8d29-0684ebc04737	98.553	4009	32	23	1	4000	14682	10691	0	7059
ctg4(+)>ctg2(+)	11f0e0e2-f040-4ec4-b991-3941ba70a2d9	98.628	4008	12	27	1	4000	7660	11632	0	7057
ctg4(+)>ctg2(+)	a7baf46d-d164-45c2-9e0e-a6d3b58995b7	98.58	4013	9	27	1	4000	1386	5363	0	7051
ctg4(+)>ctg2(+)	bbb21839-f295-4cae-b4c1-e834b16e7841	98.531	4015	15	30	1	4000	27034	31019	0	7047
ctg4(+)>ctg2(+)	283e425d-7d62-4e03-a91c-064cedf44475	98.554	4010	17	27	1	4000	2863	6841	0	7046
ctg4(+)>ctg2(+)	c888a690-1319-4c05-b6c4-485d5355e6c2	98.552	4006	24	28	1	4000	4016	7993	0	7046
ctg4(+)>ctg2(+)	013973fd-27b8-47de-8c0c-38aaf2e657b8	98.484	4023	10	38	1	4000	25036	29030	0	7044
ctg4(+)>ctg2(+)	9ecf70f0-21af-4f21-951c-fcd45627f82b	98.432	4018	28	26	1	4000	34643	30643	0	7038
ctg4(+)>ctg2(+)	701f7d93-c26e-44a2-a80f-0f46c02c5668	98.48	4012	25	26	1	4000	56701	52714	0	7038
ctg4(+)>ctg2(+)	d48cf32f-dc8a-42fb-9b33-6cb89cfc3c57	98.409	4022	24	31	1	4000	50127	54130	0	7036
ctg4(+)>ctg2(+)	89ae5c8d-adc6-4a25-aaac-a2995ec8bae4	98.453	4009	18	34	1	4000	4670	8643	0	7020
ctg4(+)>ctg2(+)	e8fe11fa-52ef-4bc8-b170-ba86d6085213	98.357	4017	29	32	1	4000	32159	28163	0	7018
ctg4(+)>ctg2(+)	b17fcc69-f0e6-48a0-b415-5db8af3adf85	98.336	4026	17	38	1	4000	2814	6815	0	7018
ctg4(+)>ctg2(+)	2d2ccd5c-c3b9-40f2-8096-86d9b00a75cf	98.43	4012	18	30	1	4000	14034	18012	0	7018
ctg4(+)>ctg2(+)	200a2937-140c-437b-8884-601505b2e335	98.428	4007	26	27	1	4000	23980	27956	0	7016
ctg4(+)>ctg2(+)	976201a6-52e9-46ec-aa3a-445a1ba77dc3	98.356	4015	25	28	1	4000	4926	8914	0	7011
ctg4(+)>ctg2(+)	cf8bcef6-f9d1-4807-a8f4-f6dccfec4d05	98.331	4014	29	27	1	4000	3745	7734	0	7007
ctg4(+)>ctg2(+)	4b785f3f-c3d4-49b9-92f8-103d56b62512	98.378	4008	22	33	1	4000	6180	10152	0	7001
ctg4(+)>ctg2(+)	cd2d6796-fc0f-44a1-bae2-a0c26e910a2d	98.33	4012	24	33	1	4000	25064	21084	0	6998
ctg4(+)>ctg2(+)	546c3b34-8113-4e8d-aba2-93eba5581908	98.281	4014	32	28	1	4000	1929	5919	0	6996
ctg4(+)>ctg2(+)	e64fa4fb-7c13-4e27-98ed-b1293924a897	98.279	4010	35	30	1	4000	20892	24877	0	6992
ctg4(+)>ctg2(+)	c81fe81a-c327-4417-9dd5-c829b900300a	98.281	4014	23	38	1	4000	22001	18020	0	6988
ctg4(+)>ctg2(+)	cd95ab80-cf58-437d-8674-2a69189f6343	98.257	4017	23	39	1	4000	20974	16988	0	6986
ctg4(+)>ctg2(+)	43eb20cd-e597-4cf6-89c0-90300b6b6067	98.304	4009	16	33	1	4000	637	4602	0	6979
ctg4(+)>ctg2(+)	e6678cbe-38a1-460a-b000-4000933989ea	98.23	4012	29	29	1	4000	13932	9951	0	6977
ctg4(+)>ctg2(+)	7d9ade2d-f4f0-4343-8c2d-e1ac446c4ef9	98.229	4008	31	30	1	4000	12774	16749	0	6972
ctg4(+)>ctg2(+)	3fb9975b-ac3e-4e38-9e1c-6e19397837f8	98.206	4013	24	28	1	4000	12665	16642	0	6968
ctg4(+)>ctg2(+)	8d698bb0-7f87-476e-9553-9122c7b59207	98.111	4024	25	26	1	4000	12026	16022	0	6962
ctg4(+)>ctg2(+)	328b7530-fd02-40d5-a8a5-984eb1c632d1	98.179	4009	29	30	1	4000	12128	16101	0	6959
ctg4(+)>ctg2(+)	2d70b425-db3b-47a8-a62c-422ff56f0019	97.916	4030	34	38	1	4000	4695	686	0	6931
ctg4(+)>ctg2(+)	6f06da7e-2626-48ff-a48b-e1f8717ab743	97.985	4019	28	40	1	4000	16191	20175	0	6924
ctg4(+)>ctg2(+)	e4d28019-ed9f-49b3-b941-0a47dc555f66	97.933	4016	47	30	1	4000	5831	1836	0	6924
ctg4(+)>ctg2(+)	d06abe38-3763-4cd6-8937-f17ed8eb4e0e	97.982	4013	31	36	1	4000	26570	22595	0	6916
ctg4(+)>ctg2(+)	13c03a1e-ec03-41c8-8460-bb4e8d929685	97.983	4015	25	36	1	4000	9287	13260	0	6914
ctg4(+)>ctg2(+)	115e357d-bcac-489a-9b2a-fb89dbf4717e	97.88	4009	50	28	1	4000	35045	31063	0	6900
ctg4(+)>ctg2(+)	bb092b61-cf3a-4508-a168-b1ce73dd33bc	97.882	4013	36	39	1	4000	11630	7654	0	6894
ctg4(+)>ctg2(+)	3381344b-4b6c-45c5-841d-c4d23ce39569	97.833	4014	43	36	1	4000	14338	10355	0	6890
ctg4(+)>ctg2(+)	abb73b96-aa22-4a7f-8dc2-ebaa59e98b05	97.787	4022	39	36	1	4000	39231	35238	0	6889
ctg4(+)>ctg2(+)	fb9fcf5c-45b0-40b1-aaee-d6622eb2d7c2	97.834	4017	34	39	1	4000	13933	17913	0	6887
ctg4(+)>ctg2(+)	dc1218c2-56e1-435b-91ec-fe77e0e22a55	97.76	4017	44	41	1	4000	13985	9998	0	6878
ctg4(+)>ctg2(+)	fd7026f2-47a8-4021-8a3e-3085e2490266	97.783	4014	37	38	1	4000	14601	10626	0	6872
ctg4(+)>ctg2(+)	10683e21-8edb-46e8-b51e-a16036cf5c5e	97.735	4018	42	40	1	4000	9925	5939	0	6870
ctg4(+)>ctg2(+)	80bead47-f1ef-44cc-9df8-16f0a01499df	97.758	4015	33	42	1	4000	2394	6366	0	6863
ctg4(+)>ctg2(+)	f30a5195-4e1a-4878-8633-ece2c2fb1c5f	97.665	4026	34	44	1	4000	74029	78020	0	6859
ctg4(+)>ctg2(+)	b0dc7fb3-7ff6-40eb-8737-036935e274c1	97.663	4023	37	42	1	4000	39595	43583	0	6855
ctg4(+)>ctg2(+)	0ae96465-4b9a-443e-9196-86b783eeebdd	97.731	4011	36	41	1	4000	35959	31993	0	6852
ctg4(+)>ctg2(+)	b84389fe-60ed-4b58-b600-c665538150bd	97.658	4014	37	44	1	4000	22814	26784	0	6839
ctg4(+)>ctg2(+)	6ba36eeb-1636-48f6-aaf0-557ba4914fb2	97.588	4022	37	42	1	4000	10653	14636	0	6835
ctg4(+)>ctg2(+)	cd47814d-a63d-4e20-bf17-2c5457ec8b53	97.47	4031	36	51	1	4000	13576	17571	0	6818
ctg4(+)>ctg2(+)	834437f7-1d90-405e-9c55-2053ee21136d	97.539	4023	29	57	1	4000	5544	9519	0	6817
ctg4(+)>ctg2(+)	9192f402-26db-41f4-a32e-d4c5bf168994	97.441	4025	42	52	1	4000	5486	1498	0	6806
ctg4(+)>ctg2(+)	e1450ecc-5f00-41b7-b215-24e6b44c1678	97.357	4011	54	44	1	4000	14601	18570	0	6772
ctg4(+)>ctg2(+)	2506a563-4980-4dbb-9406-2d007859e0f0	97.307	4010	48	47	1	4000	8342	12301	0	6752
ctg4(+)>ctg2(+)	ff5cfe25-6baa-4277-8280-b59239dca9ff	97.195	4028	45	58	1	4000	29249	25262	0	6750
ctg4(+)>ctg2(+)	b62531f7-8b27-44f9-a011-c3e0a9ce2060	96.9	4032	61	55	1	4000	13728	9729	0	6695
ctg4(+)>ctg2(+)	097d2543-6ab2-4245-b19f-c3aae9882d63	96.747	4027	50	54	1	4000	24484	20512	0	6636
ctg4(+)>ctg2(+)	71ca7aba-26b5-4818-84f8-afa22d8fbebb	96.692	4020	63	49	1	4000	7049	3080	0	6623
ctg4(+)>ctg2(+)	dc24fb7d-6657-43c7-8a5a-1d6c893e39db	96.631	4007	60	60	1	4000	9090	13028	0	6582
ctg4(+)>ctg2(+)	58ce4889-750a-4c78-97e6-8a7fd5a32411	96.131	4032	75	63	1	4000	14819	10837	0	6506
ctg4(+)>ctg2(+)	f5b5c596-f2f9-4c99-b00c-1c00d3b4a071	95.415	4035	88	76	1	4000	11828	7856	0	6336
ctg4(+)>ctg2(+)	cc3e2a40-102c-47cb-a4c6-094709a96401	95.082	4046	93	83	1	4000	19120	15135	0	6272
ctg4(+)>ctg2(+)	06ea122a-b1da-4453-9b96-6db2848b9e28	94.593	4050	97	101	1	4000	13652	17629	0	6154
ctg4(+)>ctg2(+)	bf7f0462-b5e0-4179-85ee-12ab694a989a	94.377	4037	111	98	1	4000	25852	29809	0	6091
ctg4(+)>ctg2(+)	166d2913-08db-4ad2-9f38-465be3417377	94.245	4049	97	98	1	4000	3993	7954	0	6061
ctg4(+)>ctg2(+)	b0f6eab8-6aaa-4ca2-ac65-fb5425df416a	93.506	4050	110	117	1	4000	8140	12086	0	5880
ctg4(+)>ctg2(+)	f2966129-ec4a-4eee-aa43-98be8ff8ab11	90.052	4071	171	172	1	4000	9314	13221	0	5059
ctg5(+)>ctg4(+)	da8f8910-86af-4bcc-98d2-9c860143b420	99.475	4002	6	10	1	4000	10638	6650	0	7260
ctg5(+)>ctg4(+)	928421fb-429c-4a71-9b7b-c66123f4d7cd	99.4	4002	6	14	1	4000	11441	15426	0	7241
ctg5(+)>ctg4(+)	6cce59d5-ffd9-4b68-b291-de11d0fd4904	99.127	4007	14	18	1	4000	8196	4204	0	7186
ctg5(+)>ctg4(+)	1afc9988-cf32-4333-95ba-6bc468246299	99.102	4009	10	17	1	4000	16894	12903	0	7180
ctg5(+)>ctg4(+)	9903230b-1abf-4373-9bff-9aae7d63f5bd	99.053	4012	18	16	1	4000	9646	13649	0	7180
ctg5(+)>ctg4(+)	01718f48-18fa-496e-b464-8b6069eff6a2	99.126	4004	12	17	1	4000	15092	11108	0	7179
ctg5(+)>ctg4(+)	e97f0856-d28a-4272-bb5e-5c8df5ed54ec	99.076	4005	13	22	1	4000	2256	6241	0	7169
ctg5(+)>ctg4(+)	0aa11b70-39f5-47b9-929c-bf7c99f42c73	99.028	4013	11	27	1	4000	25181	21184	0	7169
ctg5(+)>ctg4(+)	e30dd271-8275-4604-a899-f163c667598a	99.027	4010	18	19	1	4000	4490	8488	0	7169
ctg5(+)>ctg4(+)	67ee2294-9104-441d-a3e7-29b16da044b2	99.027	4008	14	19	1	4000	19797	23787	0	7162
ctg5(+)>ctg4(+)	d775fb67-224b-4f1b-8c83-0e468800139c	98.977	4009	14	21	1	4000	10786	6796	0	7151
ctg5(+)>ctg4(+)	6531dcfa-d067-4f51-be81-cee01d609be2	98.928	4012	18	18	1	4000	12710	16708	0	7147
ctg5(+)>ctg4(+)	7590e283-f609-45ab-b2f4-f98770714fb4	98.978	4010	8	21	1	4000	6661	2675	0	7147
ctg5(+)>ctg4(+)	660a1452-dbb8-4444-a202-a4dda24ceea2	98.927	4009	15	21	1	4000	16328	12339	0	7140
ctg5(+)>ctg4(+)	a2aaaffe-1120-471f-b926-ca0f3b4201b1	98.879	4015	15	21	1	4000	8187	12186	0	7138
ctg5(+)>ctg4(+)	f38fe7f8-614b-4545-8dc6-d32f93c76ccc	98.903	4012	12	23	1	4000	6247	10238	0	7136
ctg5(+)>ctg4(+)	599cf807-c0e3-4487-97b8-40025bbc05a9	98.831	4021	11	19	1	4000	18170	14165	0	7132
ctg5(+)>ctg4(+)	7e34e112-a5a1-4797-8f42-0c832e0b0f1c	98.902	4008	9	25	1	4000	9212	5232	0	7125
ctg5(+)>ctg4(+)	4866b954-6405-4e45-8680-0b33ff157444	98.805	4016	21	24	1	4000	4657	653	0	7125
ctg5(+)>ctg4(+)	8bd88f95-3db8-4f57-89a6-ea00df292daa	98.804	4013	22	20	1	4000	22525	26524	0	7121
ctg5(+)>ctg4(+)	1a56f4ee-06c4-469c-be2e-a0e8cd19b52d	98.803	4010	16	23	1	4000	101	4088	0	7110
ctg5(+)>ctg4(+)	a0802d4a-582f-44cc-ae95-b019298c54a1	98.73	4016	23	27	1	4000	6062	2059	0	7108
ctg5(+)>ctg4(+)	1a942d44-1437-4e06-8d02-86cbf43376ff	98.756	4018	10	30	1	4000	5972	1977	0	7107
ctg5(+)>ctg4(+)	8ace175c-3051-46f8-a530-bb8bf699f169	98.752	4008	20	24	1	4000	11048	7063	0	7097
ctg5(+)>ctg4(+)	c539b5e5-2e2d-47f3-b721-4a50b4fe279a	98.753	4011	14	26	1	4000	27301	31286	0	7097
ctg5(+)>ctg4(+)	aae2bdd4-5b35-4730-aa3c-6882ae598ea5	98.678	4009	23	27	1	4000	430	4417	0	7083
ctg5(+)>ctg4(+)	de4dd279-96f6-43e9-8c92-426009d7ee42	98.702	4006	12	27	1	4000	8115	12086	0	7073
ctg5(+)>ctg4(+)	33278792-b959-4b81-8886-d3f16edf4fca	98.58	4014	29	23	1	4000	4293	294	0	7071
ctg5(+)>ctg4(+)	a5844c53-5171-4ec7-8fce-90a5733c9837	98.581	4017	23	27	1	4000	18034	14035	0	7071
ctg5(+)>ctg4(+)	d4a9e0db-bac3-4612-9b47-301e7fcd97cc	98.582	4020	18	27	1	4000	1238	5238	0	7071
ctg5(+)>ctg4(+)	f5a064f6-ad3b-4240-805a-a4f3b49d8a8d	98.605	4014	21	25	1	4000	11112	7120	0	7070
ctg5(+)>ctg4(+)	94db7998-0120-4ffd-a5a1-6db23d04da85	98.628	4010	15	27	1	4000	1032	5011	0	7064
ctg5(+)>ctg4(+)	0fae738a-6daa-4124-8591-6973df6fa01e	98.58	4015	19	27	1	4000	17460	21451	0	7064
ctg5(+)>ctg4(+)	a3f22375-dfc5-4daa-b33e-e169bc34be15	98.506	4017	25	26	1	4000	15353	11355	0	7053
ctg5(+)>ctg4(+)	5e33b6ca-3337-4563-a159-92e9ff914b0c	98.53	4014	24	28	1	4000	8391	12383	0	7053
ctg5(+)>ctg4(+)	69d3f065-e916-41bb-8096-64f5cfc23f50	98.507	4019	21	30	1	4000	2497	6495	0	7053
ctg5(+)>ctg4(+)	0edbcf67-7b97-439b-b33f-a7ddde1e88fd	98.553	4008	26	22	1	4000	9517	5534	0	7051
ctg5(+)>ctg4(+)	bf427fbb-476d-4249-b00a-ce1b91cd0752	98.506	4017	23	34	1	4000	4667	8663	0	7051
ctg5(+)>ctg4(+)	cb5b2b49-b552-491b-bdd9-a2d651cc78b5	98.553	4007	25	26	1	4000	8919	4939	0	7047
ctg5(+)>ctg4(+)	92b85a1e-ba42-4a3d-a88f-95b017bc0aa2	98.505	4013	24	29	1	4000	6088	2099	0	7046
ctg5(+)>ctg4(+)	f9694117-5046-4272-a4fc-c5a42e23ea74	98.528	4009	19	29	1	4000	3705	7682	0	7040
ctg5(+)>ctg4(+)	f0210a0f-635d-499d-9c7f-92497189ce4f	98.455	4014	26	30	1	4000	7910	3919	0	7036
ctg5(+)>ctg4(+)	14c481ef-4e9f-43db-9fb7-7e80177ae655	98.433	4020	19	34	1	4000	30910	26915	0	7035
ctg5(+)>ctg4(+)	6cab2731-4876-415a-9807-586621465dcb	98.43	4014	30	22	1	4000	16180	20174	0	7033
ctg5(+)>ctg4(+)	8aec1ab3-7044-40c7-ae55-7fc490f2883b	98.501	4003	27	27	1	4000	13193	17165	0	7029
ctg5(+)>ctg4(+)	2127a8ce-234a-4d65-a338-afb458f7d439	98.431	4016	22	27	1	4000	2407	6397	0	7029
ctg5(+)>ctg4(+)	3c576a9a-434a-4f4b-b038-b96815918ce4	98.43	4013	24	32	1	4000	8390	12376	0	7025
ctg5(+)>ctg4(+)	5db90d69-d377-439c-bb19-d54892472451	98.404	4011	21	28	1	4000	22425	26403	0	7012
ctg5(+)>ctg4(+)	e2903ae4-037b-43bd-b3a4-7040b7b21662	98.307	4016	21	31	1	4000	1512	5496	0	6996
ctg5(+)>ctg4(+)	e42e74c8-5efa-4935-9394-73f3edbc68ae	98.306	4014	22	33	1	4000	11816	15797	0	6994
ctg5(+)>ctg4(+)	1672533c-5c69-45fe-8dde-30a09dac7a7f	98.258	4019	25	38	1	4000	27531	31523	0	6992
ctg5(+)>ctg4(+)	8e13d4b5-db0e-45cc-a437-73583538cf24	98.184	4020	34	28	1	4000	7841	3841	0	6983
ctg5(+)>ctg4(+)	019bc0af-f971-4313-8847-f076086ad29d	98.185	4021	22	38	1	4000	6737	2747	0	6974
ctg5(+)>ctg4(+)	2546f439-ee52-4d01-9c03-27748d90bd53	98.136	4023	27	41	1	4000	13694	17691	0	6970
ctg5(+)>ctg4(+)	03c32166-a1ec-4af3-8924-114a55454d19	98.204	4010	29	32	1	4000	19538	15562	0	6966
ctg5(+)>ctg4(+)	07815fb5-51c0-471e-b7be-f4b1495cf1bd	98.157	4015	31	34	1	4000	14692	18678	0	6964
ctg5(+)>ctg4(+)	456b4622-2eab-4540-9aa9-0264266c4319	98.132	4016	30	33	1	4000	7395	3409	0	6959
ctg5(+)>ctg4(+)	cd45a55c-2d59-49a1-8be4-9afa87eb589a	98.156	4012	30	25	1	4000	1526	5505	0	6959
ctg5(+)>ctg4(+)	f36d3f67-08b2-4e9e-a7c9-4b540fdb02ed	98.085	4021	25	38	1	4000	11581	7592	0	6951
ctg5(+)>ctg4(+)	9e086bc1-beb1-4fe3-81b1-adc506fc469a	98.083	4016	25	34	1	4000	31641	35620	0	6942
ctg5(+)>ctg4(+)	8b6d736b-78e4-4f31-83d6-87ed9c80e890	98.013	4026	25	47	1	4000	10196	6200	0	6940
ctg5(+)>ctg4(+)	143e5e04-fcde-4260-af19-07a780e31ac2	98.083	4016	21	43	1	4000	206	4181	0	6938
ctg5(+)>ctg4(+)	59ad7a37-ccc1-4e61-b8a3-5713b985d61f	97.962	4023	34	36	1	4000	6241	2244	0	6931
ctg5(+)>ctg4(+)	783936cf-9b5b-475f-9048-16909cc52f10	98.01	4021	20	42	1	4000	12781	16762	0	6927
ctg5(+)>ctg4(+)	4f5965a9-6fd5-4710-aeab-2e5eea480421	98.009	4019	20	24	1	4000	33063	29086	0	6924
ctg5(+)>ctg4(+)	ea247272-2f42-4076-bcfc-29defcd73de1	98.005	4011	32	32	1	4000	5508	1535	0	6920
ctg5(+)>ctg4(+)	7883a783-1c11-4c9e-b047-eb81d0b9c1f7	97.886	4021	37	39	1	4000	7363	3370	0	6911
ctg5(+)>ctg4(+)	8f4aa6e2-80e5-4bbb-8e03-2fc0c5b115cb	98.005	4011	23	44	1	4000	1143	5107	0	6911
ctg5(+)>ctg4(+)	ac511ec4-5617-4994-b80b-46ef80321107	97.885	4018	34	43	1	4000	13206	9222	0	6902
ctg5(+)>ctg4(+)	234b0a3d-17a4-4015-9685-84a034bbfa51	97.883	4016	34	33	1	4000	10284	6304	0	6898
ctg5(+)>ctg4(+)	35acc759-bd93-40ce-a0cc-f382a5a6a27c	97.859	4016	40	31	1	4000	33851	37836	0	6898
ctg5(+)>ctg4(+)	a79b324c-22c2-4b1c-85e4-e7136c2dbbb4	97.857	4013	34	39	1	4000	6765	2792	0	6887
ctg5(+)>ctg4(+)	cc499a40-b70d-46af-826f-07b1c2755539	97.707	4013	34	40	1	4000	6704	10671	0	6848
ctg5(+)>ctg4(+)	56f4a4ab-7834-4f0e-8a2e-c1e1713b6ea8	97.683	4014	33	41	1	4000	6292	10259	0	6842
ctg5(+)>ctg4(+)	acd3b2e6-f779-4925-8f69-8a26db428bdb	97.562	4020	47	40	1	4000	4509	521	0	6833
ctg5(+)>ctg4(+)	597786b0-4c1b-4cb8-b5c5-d5bd3f9ddcec	97.466	4025	34	43	1	4000	18374	14393	0	6806
ctg5(+)>ctg4(+)	c16612fd-53ab-48a6-b7de-efa65e6b5f9d	97.439	4022	37	44	1	4000	13364	9387	0	6796
ctg5(+)>ctg4(+)	09c40b07-2ec4-428c-a733-d6e9aed8a976	97.414	4022	35	48	1	4000	15449	11475	0	6787
ctg5(+)>ctg4(+)	bffeca06-7ce3-4375-be93-4b402f288cfa	97.363	4019	44	50	1	4000	7119	11094	0	6778
ctg5(+)>ctg4(+)	0f32591b-42d0-41b3-af33-279ad59291a0	97.431	4009	37	50	1	4000	5316	9267	0	6772
ctg5(+)>ctg4(+)	4b826ddf-a2b7-42b0-a8bb-e12b69ade936	97.237	4018	46	48	1	4000	7414	11384	0	6745
ctg5(+)>ctg4(+)	f5495f70-587b-45ef-bf7c-d8b8b1e0fda8	97.144	4026	53	48	1	4000	11831	7842	0	6741
ctg5(+)>ctg4(+)	424bd939-a99c-44e4-8031-4e2d2f1815ef	97.234	4013	51	48	1	4000	8102	4137	0	6741
ctg5(+)>ctg4(+)	d86d6d34-366c-4558-bcd0-d8238c893746	97.136	4016	55	52	1	4000	9876	5905	0	6724
ctg5(+)>ctg4(+)	37f014dc-bb46-4c37-b903-9001d5b513ef	96.976	4034	50	42	1	4000	25119	21124	0	6708
ctg5(+)>ctg4(+)	227cc558-7323-41b7-9e4b-b2745c22cd95	96.738	4016	49	61	1	4000	5616	1667	0	6615
ctg5(+)>ctg4(+)	bb7090f9-5233-45f1-bc20-ba485c5723d2	95.812	4035	69	76	1	4000	12643	16612	0	6423
ctg5(+)>ctg4(+)	30dac250-c0cb-4a18-b15a-e6ec29313037	95.144	4036	70	98	1	4000	33594	29649	0	6252
ctg5(+)>ctg4(+)	2a34ff7e-cc3b-4521-b741-e4f42d3ea5bf	94.627	4020	100	81	1	4000	12553	16476	0	6120
ctg5(+)>ctg4(+)	12c81a90-65ee-45ca-bec6-18e171938ffb	94.206	4056	86	97	1	4000	7301	11263	0	6050
ctg5(+)>ctg4(+)	a202b419-354d-4c14-903d-977a49fbf8ab	93.767	4043	120	95	1	4000	6595	10548	0	5949
ctg5(-)>ctg1(+)	229229cc-6988-4abc-8690-49c7a3240e9f	99.401	4009	11	11	1	4000	14120	10116	0	7258
ctg5(-)>ctg1(+)	eab07fe1-6878-457a-b34f-5543dae7ad9e	99.426	4004	10	11	1	4000	16747	20741	0	7254
ctg5(-)>ctg1(+)	2bc3f8f7-aa2f-430c-9770-e0a4517dc55a	99.426	4005	3	11	1	4000	16164	12175	0	7251
ctg5(-)>ctg1(+)	3298b14b-0f09-45eb-aba7-de54e525c21b	99.351	4007	9	13	1	4000	5772	1776	0	7239
ctg5(-)>ctg1(+)	37487058-e601-4b61-8124-cceca3e044d1	99.327	4010	4	17	1	4000	2800	6796	0	7234
ctg5(-)>ctg1(+)	47315577-ff06-4901-b861-bb304ca90b61	99.326	4005	9	14	1	4000	6275	10266	0	7230
ctg5(-)>ctg1(+)	dcd26c4c-2e0b-4cb8-b7e2-98e552ae7ee4	99.301	4004	10	15	1	4000	8688	4699	0	7223
ctg5(-)>ctg1(+)	9d5bce29-b2af-49a5-8c20-aca8609531c6	99.3	4001	12	13	1	4000	6627	10612	0	7219
ctg5(-)>ctg1(+)	bce31c9d-dbe2-4fbc-8c09-ab0efeb53308	99.251	4008	12	15	1	4000	831	4828	0	7219
ctg5(-)>ctg1(+)	c54bac4a-41ad-4769-9d39-c40ffb03b332	99.276	4004	11	12	1	4000	4724	8713	0	7217
ctg5(-)>ctg1(+)	d044aca8-534e-49fc-a0fd-f589c4f556da	99.201	4004	16	16	1	4000	23677	27668	0	7203
ctg5(-)>ctg1(+)	03c0990e-e96c-446f-9560-942db8c623db	99.177	4012	7	20	1	4000	16979	12982	0	7203
ctg5(-)>ctg1(+)	fc958971-725e-42fa-9f0d-941ce3a4eca0	99.177	4008	13	15	1	4000	523	4518	0	7201
ctg5(-)>ctg1(+)	59547801-4d26-497c-b979-838adf772126	99.127	4009	15	16	1	4000	9832	13829	0	7191
ctg5(-)>ctg1(+)	12666fce-0385-40bb-84b0-4d45148c9995	99.127	4011	10	13	1	4000	16766	12770	0	7190
ctg5(-)>ctg1(+)	25dfd95b-49aa-48ab-92d1-76ea8ce180df	99.053	4012	14	19	1	4000	8858	4859	0	7177
ctg5(-)>ctg1(+)	c76553e3-94bc-4e7b-adc3-88e4089426ea	99.052	4009	18	17	1	4000	8351	12348	0	7175
ctg5(-)>ctg1(+)	6ef108e9-3c07-45fb-8e23-5fe6efe57404	99.028	4011	21	15	1	4000	61127	65130	0	7175
ctg5(-)>ctg1(+)	3405d020-8775-48c7-80ec-d43d151bcd56	99.053	4014	7	23	1	4000	8294	12290	0	7173
ctg5(-)>ctg1(+)	a090d911-848f-4a3b-b35f-402eb6c84294	99.077	4007	12	18	1	4000	3820	7808	0	7171
ctg5(-)>ctg1(+)	acf14866-890e-4665-a0f6-96571d4e7f45	99.077	4007	11	20	1	4000	4438	8425	0	7171
ctg5(-)>ctg1(+)	00a2582f-d12b-4a4e-82ef-1fb04a537be0	99.002	4008	20	16	1	4000	1535	5530	0	7162
ctg5(-)>ctg1(+)	c20e285d-bb5d-46ef-bf7d-463259843923	99.003	4011	13	22	1	4000	19843	15849	0	7160
ctg5(-)>ctg1(+)	2a478b1a-dc88-4864-ac94-7895c9ceba91	99.001	4005	20	18	1	4000	29031	25042	0	7156
ctg5(-)>ctg1(+)	c5d58929-395c-4dc0-90ea-8df12d26d027	98.978	4011	14	21	1	4000	11214	15208	0	7155
ctg5(-)>ctg1(+)	a5b45a82-51e9-4e63-8dca-0a6e1d8d8909	98.976	4005	13	20	1	4000	21496	17515	0	7143
ctg5(-)>ctg1(+)	207b1598-9326-4e84-be2c-13ac6a576bf4	98.903	4010	20	19	1	4000	11204	15199	0	7140
ctg5(-)>ctg1(+)	c27db0fb-54ce-42b8-88eb-af26575cba12	98.855	4016	20	20	1	4000	18597	14592	0	7138
ctg5(-)>ctg1(+)	a46eab6a-88bc-47e2-ba5f-664522572130	98.902	4006	24	15	1	4000	13367	9376	0	7136
ctg5(-)>ctg1(+)	d1377e0d-406e-4712-a7f8-9e236d9ae76a	98.952	4006	10	26	1	4000	46840	50819	0	7136
ctg5(-)>ctg1(+)	d345e1f8-444d-4410-8f20-3218b1c81927	98.927	4007	14	18	1	4000	16035	20019	0	7134
ctg5(-)>ctg1(+)	21418e1a-1ccf-4c69-8b1b-aecc7b34cf30	98.903	4010	14	24	1	4000	7873	11862	0	7134
ctg5(-)>ctg1(+)	2d76547b-4e52-42d8-855e-bc77a5035990	98.806	4019	22	19	1	4000	44613	40602	0	7132
ctg5(-)>ctg1(+)	6ddf5f13-84a9-410e-9205-2f4a63375330	98.854	4013	20	22	1	4000	16124	20123	0	7132
ctg5(-)>ctg1(+)	9e5d7260-2516-4505-bd12-8527f1d43045	98.829	4013	22	18	1	4000	2669	6669	0	7127
ctg5(-)>ctg1(+)	2ea5b42a-d81e-4569-b055-a33bc37f0a7a	98.853	4012	14	20	1	4000	14628	10637	0	7125
ctg5(-)>ctg1(+)	ac63f859-1c44-4490-9f60-e21982464cea	98.852	4008	22	23	1	4000	27005	30996	0	7125
ctg5(-)>ctg1(+)	3dc3764b-54ea-442b-9b7b-bcd8858a8cdc	98.779	4014	23	17	1	4000	7752	11753	0	7118
ctg5(-)>ctg1(+)	e2fa01c5-a3b8-4e2f-a777-585411ebcd19	98.828	4009	16	22	1	4000	11217	15203	0	7114
ctg5(-)>ctg1(+)	6aed42d1-f7a9-48cf-928f-4c83324b51b0	98.826	4003	25	20	1	4000	14840	18823	0	7112
ctg5(-)>ctg1(+)	81ee2bad-9137-4b2d-8101-96a66aaa3121	98.826	4003	23	20	1	4000	3854	7835	0	7110
ctg5(-)>ctg1(+)	fee51f44-03cd-42c6-b814-b0cd4a4aae96	98.779	4012	17	31	1	4000	8253	12244	0	7108
ctg5(-)>ctg1(+)	77e0b1f6-3dc1-4e3d-aa57-076733e1d2b5	98.73	4017	15	27	1	4000	23473	27470	0	7103
ctg5(-)>ctg1(+)	50b7ec6e-6e84-4369-8f62-873f03b1acd6	98.754	4012	19	22	1	4000	27567	23575	0	7103
ctg5(-)>ctg1(+)	76d741c2-9563-4678-bfda-4535cefb23de	98.754	4012	17	28	1	4000	4025	8015	0	7101
ctg5(-)>ctg1(+)	17f330ea-d4ad-450b-aacb-7a266c5affc9	98.704	4013	23	21	1	4000	28484	24488	0	7095
ctg5(-)>ctg1(+)	a0d575fa-d894-4b0b-ac52-c25ef21e6c95	98.704	4012	22	26	1	4000	7860	3867	0	7094
ctg5(-)>ctg1(+)	27ad5421-52d7-4d87-ac98-773f87fbdf44	98.752	4007	15	27	1	4000	22586	18608	0	7090
ctg5(-)>ctg1(+)	e8d79e7c-9a73-46b7-b9da-ee2de515da7d	98.607	4020	19	26	1	4000	5843	1841	0	7079
ctg5(-)>ctg1(+)	e4eaf7f2-9820-4245-8484-cc907cee6a39	98.606	4017	24	28	1	4000	20428	24429	0	7079
ctg5(-)>ctg1(+)	aa788bab-6734-4d94-b5a2-48a4ebebad26	98.556	4017	28	24	1	4000	20309	24312	0	7070
ctg5(-)>ctg1(+)	0a074cba-dc2e-4375-ad32-09adfa4046dd	98.604	4012	19	27	1	4000	5406	1420	0	7064
ctg5(-)>ctg1(+)	dd67a4bd-e59b-4822-a797-5c3c998cf064	98.603	4009	24	30	1	4000	8354	12339	0	7064
ctg5(-)>ctg1(+)	1de4cda4-34eb-4dfe-a427-3c18898a7f24	98.531	4016	23	29	1	4000	22626	26621	0	7057
ctg5(-)>ctg1(+)	11d8a132-7183-44d9-8c39-4f3242f69b94	98.554	4010	24	26	1	4000	1289	5274	0	7053
ctg5(-)>ctg1(+)	a033da02-e6e3-4020-b8af-264903d9a047	98.578	4008	19	28	1	4000	4112	135	0	7051
ctg5(-)>ctg1(+)	f1c18afb-44f6-43b6-9748-f3b5de2a8c18	98.458	4022	21	31	1	4000	12130	16132	0	7046
ctg5(-)>ctg1(+)	0a3e90cc-45a7-44fa-ae4e-b4b3797e9311	98.458	4020	24	31	1	4000	5812	9813	0	7046
ctg5(-)>ctg1(+)	02a5e80f-eed3-4a34-bea0-f0bdd5c112db	98.48	4014	23	23	1	4000	13691	9702	0	7040
ctg5(-)>ctg1(+)	d375a77e-5d23-4d9d-ad35-9e4cf5a8a008	98.478	4009	32	19	1	4000	13608	17596	0	7038
ctg5(-)>ctg1(+)	7ee71e87-ad49-4266-8766-d1cb3191c157	98.478	4008	29	25	1	4000	6994	3011	0	7035
ctg5(-)>ctg1(+)	effc52ff-e747-4487-abe6-61c07017e446	98.456	4015	23	31	1	4000	18046	14056	0	7035
ctg5(-)>ctg1(+)	d197017f-502c-4b0f-bb12-3228660e1076	98.379	4011	26	28	1	4000	11097	7115	0	7011
ctg5(-)>ctg1(+)	58788b68-1587-4c7d-83ab-b67f89812ff6	98.357	4017	16	35	1	4000	4006	23	0	7007
ctg5(-)>ctg1(+)	d56b0b94-b297-4add-b9f9-37442f4c57cf	98.308	4020	23	34	1	4000	27090	31084	0	7005
ctg5(-)>ctg1(+)	81d8953d-bb50-4707-903c-b55bd6a4a267	98.402	4004	25	28	1	4000	14585	10617	0	7003
ctg5(-)>ctg1(+)	7d446ded-99b8-4d69-99b3-fede742bb787	98.304	4009	24	31	1	4000	22574	18601	0	6986
ctg5(-)>ctg1(+)	42422755-ab9f-45c8-81c4-bf483434c4ac	98.208	4018	32	35	1	4000	15894	11899	0	6985
ctg5(-)>ctg1(+)	cd20a94a-b8b4-4e16-949a-74955db6e659	98.279	4009	28	30	1	4000	4071	8047	0	6983
ctg5(-)>ctg1(+)	1f7f0bab-0661-44fa-9c04-ce46a706d2cc	98.231	4014	24	31	1	4000	949	4929	0	6975
ctg5(-)>ctg1(+)	68f76f93-a6ae-4410-a0d5-4b733dc599ba	98.159	4020	26	39	1	4000	15590	11599	0	6970
ctg5(-)>ctg1(+)	2d8a7cea-8b05-4793-a2fc-369f81651136	98.18	4011	31	28	1	4000	16352	12373	0	6964
ctg5(-)>ctg1(+)	b5d772b1-eefc-48f1-9400-8b5b2e7525b8	98.059	4018	25	42	1	4000	25417	21435	0	6938
ctg5(-)>ctg1(+)	5a8719ed-4e72-4c46-82ce-debb658a71b1	98.032	4015	35	36	1	4000	37614	33629	0	6937
ctg5(-)>ctg1(+)	1e698643-2a65-4e92-8d2c-218bf31a9926	98.028	4007	35	30	1	4000	8270	12239	0	6922
ctg5(-)>ctg1(+)	9bfa1971-ff7c-4776-ba52-7e135aa4c64d	97.81	4019	34	41	1	4000	11759	7776	0	6885
ctg5(-)>ctg1(+)	1d983050-d41e-4689-8a9d-42c091c410ad	97.857	4013	33	41	1	4000	16265	20237	0	6885
ctg5(-)>ctg1(+)	d80d179a-8f47-47a5-bc58-4be8cd4b8316	97.804	4007	35	33	1	4000	30801	34761	0	6863
ctg5(-)>ctg1(+)	93f02b3d-f6fb-43ba-9408-5fc3ef2f9b7b	97.636	4019	42	42	1	4000	9762	13746	0	6846
ctg5(-)>ctg1(+)	5effcf40-ceb3-461f-91c3-97f7c5c9d486	97.56	4016	45	41	1	4000	17493	21471	0	6824
ctg5(-)>ctg1(+)	2ed05686-cac2-45c5-bb0a-07340eb83ed5	97.419	4030	49	43	1	4000	21749	25753	0	6815
ctg5(-)>ctg1(+)	f3fc3706-4bfa-4f87-9f54-253759eaa87b	97.436	4017	50	41	1	4000	8436	4456	0	6798
ctg5(-)>ctg1(+)	c4381915-b3bb-41ef-a4ce-390039a76823	97.288	4019	47	43	1	4000	12003	8028	0	6761
ctg5(-)>ctg1(+)	65d83665-052d-4b07-a1db-d80f3afdc046	97.189	4020	46	47	1	4000	3072	7044	0	6735
ctg5(-)>ctg1(+)	c89927b6-1896-4cd7-aa2e-c7aad8c2c0e8	97.048	4031	49	58	1	4000	4928	8919	0	6721
ctg5(-)>ctg1(+)	879a2e69-c79d-4d9b-8ac6-3eb246000a8f	96.977	4036	38	59	1	4000	19886	23873	0	6700
ctg5(-)>ctg1(+)	32149712-2e20-4b7c-acc0-6d5363e96074	96.958	4010	46	54	1	4000	11624	15567	0	6660
ctg5(-)>ctg1(+)	68658b09-af77-46f2-a756-dbea6877d759	96.773	4028	61	51	1	4000	4097	111	0	6654
ctg5(-)>ctg1(+)	5cb4f373-a235-41dc-9ad7-1b780f2df24c	96.793	4023	50	60	1	4000	11668	7702	0	6641
ctg5(-)>ctg1(+)	6f23f2b1-1ea9-4d59-bc82-85206824d0f9	96.674	4029	47	74	1	4000	4583	8553	0	6617
ctg5(-)>ctg1(+)	75ef3ed3-1963-46e3-89e9-09756baa3ade	96.628	4033	53	68	1	4000	12013	15995	0	6617
ctg5(-)>ctg1(+)	6651ad6c-034e-4aed-b13f-6594eac851c3	96.517	4020	54	59	1	4000	28564	32517	0	6569
ctg5(-)>ctg1(+)	a2dd3094-3098-48d0-a02e-8476db325839	96.234	4036	71	61	1	4000	7323	3333	0	6536
ctg5(-)>ctg1(+)	83e3134f-89bf-4138-903e-10fbb76f7635	96.126	4053	49	75	1	4000	38878	42875	0	6516
ctg5(-)>ctg1(+)	944f62f0-055f-4550-9e5e-354f54f7ef4c	95.647	4043	60	77	1	4000	10112	6143	0	6384
ctg5(-)>ctg1(+)	f30794cc-7ba7-483f-b5de-44a8c66c63cf	95.488	4034	86	75	1	4000	15152	11181	0	6353
ctg5(-)>ctg1(+)	6ac052cf-4f3b-4875-aff5-c38dabc9fed5	95.356	4027	69	91	1	4000	2802	6737	0	6292
ctg5(-)>ctg1(+)	652476f2-a052-4cab-8628-737f962410d0	95.078	4023	90	81	1	4000	4379	8316	0	6233
ctg5(-)>ctg1(+)	b8f8e88c-2f5b-4c48-8702-271d32bdb47a	94.742	4032	96	95	1	4000	22544	18597	0	6165
ctg5(-)>ctg1(+)	ee462d01-322d-4faa-9542-9dcd79230467	94.521	4052	95	98	1	4000	13037	9061	0	6135
ctg5(-)>ctg1(+)	c57265bb-0450-4c09-a33c-c215131b0fa1	90.461	4057	171	162	1	4000	12495	8598	0	5149
ctg6(+)>ctg1(-)	ddfd9ee8-06c2-4d65-9f4e-2765b69331bc	99.575	4003	5	10	1	4000	31639	35632	0	7287
ctg6(+)>ctg1(-)	f77a3049-e00b-48b3-bc1d-d6f7ea7115c5	99.475	4003	9	12	1	4000	31210	27217	0	7265
ctg6(+)>ctg1(-)	70a1a42e-e7f6-4cda-b096-b7d84e1a2dbe	99.426	4008	4	14	1	4000	481	4477	0	7256
ctg6(+)>ctg1(-)	b9a5fb64-ca3e-4f46-b35e-e967cdbec90d	99.351	4009	10	14	1	4000	3929	7930	0	7245
ctg6(+)>ctg1(-)	b0b582a9-f82b-4650-968c-ba24177d2ac7	99.301	4006	14	11	1	4000	16470	20467	0	7230
ctg6(+)>ctg1(-)	bd700269-07d2-45c9-ae5e-8504f67ec932	99.301	4006	9	16	1	4000	4543	551	0	7225
ctg6(+)>ctg1(-)	44e55e3f-a03e-4916-8be8-3e3caf3b8af3	99.276	4005	9	14	1	4000	7755	11744	0	7217
ctg6(+)>ctg1(-)	dbc1b943-a648-47bd-82b3-37776a027ad9	99.276	4003	11	15	1	4000	28461	24474	0	7215
ctg6(+)>ctg1(-)	28f5dcd1-cbbe-4b39-ad12-852d580bfe91	99.201	4003	20	11	1	4000	20557	16564	0	7204
ctg6(+)>ctg1(-)	4025d3c2-a696-483f-81f4-42afacf3fbee	99.177	4008	11	17	1	4000	23029	27022	0	7199
ctg6(+)>ctg1(-)	6f685eca-c808-48ad-ba85-00d464561b0d	99.152	4009	15	12	1	4000	8290	4292	0	7197
ctg6(+)>ctg1(-)	5c3c7a22-a3b1-49f2-9632-28766889f57a	99.152	4010	11	18	1	4000	43399	39403	0	7195
ctg6(+)>ctg1(-)	af6b83bb-dd8e-4c09-a86c-3dc5501b36c2	99.151	4006	16	16	1	4000	9375	5382	0	7193
ctg6(+)>ctg1(-)	271944e4-e024-46cc-9641-d5b3761957b2	99.176	4007	7	23	1	4000	18029	22016	0	7193
ctg6(+)>ctg1(-)	509e5fde-08e3-4188-b098-a548789ae1c8	99.127	4010	15	17	1	4000	5230	1231	0	7193
ctg6(+)>ctg1(-)	54d9b1ff-d427-4a63-80cf-2c3957c0d673	99.128	4012	9	21	1	4000	23706	19709	0	7191
ctg6(+)>ctg1(-)	ba4d62c4-80b5-4c29-bd37-17da149fbe56	99.176	4006	6	23	1	4000	12371	8387	0	7190
ctg6(+)>ctg1(-)	9d78760b-4e3b-4da8-bfce-ac6572db5fba	99.151	4004	13	19	1	4000	9052	5066	0	7186
ctg6(+)>ctg1(-)	99ee96b9-04f2-4735-b3e5-866654314be9	99.077	4010	13	21	1	4000	3346	7341	0	7179
ctg6(+)>ctg1(-)	6994cc1b-e516-4c5b-b892-74d5b2d7cf21	99.027	4010	16	18	1	4000	5163	9159	0	7167
ctg6(+)>ctg1(-)	b552d18c-96ad-48dd-bf0d-dc552da5e995	99.051	4006	11	20	1	4000	6922	10906	0	7162
ctg6(+)>ctg1(-)	5f14b3f2-fbe3-4c9b-8300-45f575222119	98.953	4013	21	18	1	4000	27969	23965	0	7158
ctg6(+)>ctg1(-)	a58ec84d-e42d-4315-a5ae-50e8475be97e	99.002	4008	12	21	1	4000	5126	1139	0	7155
ctg6(+)>ctg1(-)	05e49ad2-2d3a-4075-b8b1-eebd3d292729	98.977	4009	17	21	1	4000	1266	5259	0	7155
ctg6(+)>ctg1(-)	d67eff32-9514-40b7-822b-3d741a639a24	99.001	4005	18	17	1	4000	2587	6574	0	7155
ctg6(+)>ctg1(-)	d92c7886-4bec-4761-ba72-f601ca7d4a4d	99.002	4009	11	21	1	4000	10143	14131	0	7155
ctg6(+)>ctg1(-)	f6449a70-5791-454a-9de1-f3b470240361	98.953	4012	12	22	1	4000	6524	10517	0	7149
ctg6(+)>ctg1(-)	a78fe8ec-8856-47b3-9fa1-1869bca4e5fc	98.976	4003	24	13	1	4000	16536	12548	0	7149
ctg6(+)>ctg1(-)	6caf452e-125f-4fcf-9aee-d756ec75f8c0	98.952	4008	19	19	1	4000	16387	12395	0	7147
ctg6(+)>ctg1(-)	e6fc55fc-9fae-4695-bdfc-2aece1c77edf	98.927	4007	23	14	1	4000	8861	4868	0	7143
ctg6(+)>ctg1(-)	7f28071d-dd45-47a6-ac05-0ba29c790e82	98.902	4009	18	22	1	4000	9845	13836	0	7136
ctg6(+)>ctg1(-)	f85a73c8-5af9-44d9-adca-ae087afe2663	98.903	4010	16	26	1	4000	10341	6350	0	7136
ctg6(+)>ctg1(-)	57258452-138a-4aad-afac-3a246947690a	98.902	4008	19	18	1	4000	38297	42287	0	7134
ctg6(+)>ctg1(-)	c6d10650-0dab-45eb-a52f-aa21cd84a7d9	98.902	4006	21	20	1	4000	10350	6362	0	7132
ctg6(+)>ctg1(-)	9fb1ed2d-85bd-4d99-8db9-db6f999adac6	98.878	4009	18	21	1	4000	2655	6645	0	7129
ctg6(+)>ctg1(-)	00cc4584-8522-4e5d-83c6-76826957ae49	98.83	4016	15	23	1	4000	148	4147	0	7127
ctg6(+)>ctg1(-)	933fc990-4975-4be2-a5f9-4b1d73fff03c	98.853	4011	15	24	1	4000	4832	8822	0	7123
ctg6(+)>ctg1(-)	32678d60-51ee-45ac-a297-6d16975e39ed	98.829	4012	19	23	1	4000	4651	8646	0	7123
ctg6(+)>ctg1(-)	8e4631bd-bf33-4c44-bfb2-6014eb886e95	98.829	4013	16	24	1	4000	6082	2088	0	7121
ctg6(+)>ctg1(-)	8224dd08-e429-4d67-b241-c06e16f5efa5	98.829	4014	14	21	1	4000	10643	6649	0	7121
ctg6(+)>ctg1(-)	93d4af45-f5b4-44aa-906c-5cebf3082bcc	98.804	4014	19	21	1	4000	24591	20593	0	7119
ctg6(+)>ctg1(-)	276748bc-5a5a-4c17-8bb8-f84feab98d29	98.828	4011	16	22	1	4000	11426	7436	0	7118
ctg6(+)>ctg1(-)	46b6e49c-447b-4220-8609-c43ee78294d3	98.78	4015	19	23	1	4000	6653	10652	0	7116
ctg6(+)>ctg1(-)	0c58f05d-cb1d-4738-8d6e-82e0c74eb165	98.804	4013	17	25	1	4000	20624	16630	0	7116
ctg6(+)>ctg1(-)	9ec29445-d1b1-4b98-af55-61d300755aa8	98.876	4005	7	25	1	4000	14529	18500	0	7112
ctg6(+)>ctg1(-)	ce2bee49-17ce-474d-9614-847e4a2fe579	98.779	4012	19	23	1	4000	1509	5502	0	7110
ctg6(+)>ctg1(-)	624bf706-dd0b-4018-8cd0-54b12d1589dc	98.778	4011	15	23	1	4000	11799	7812	0	7105
ctg6(+)>ctg1(-)	3f82c5fb-7979-4150-9cfb-75cb18d301c0	98.826	4005	13	28	1	4000	27081	23106	0	7105
ctg6(+)>ctg1(-)	406f7492-95a7-4185-b4a1-f322421b234a	98.777	4007	22	21	1	4000	5495	1509	0	7103
ctg6(+)>ctg1(-)	2da5530e-cb29-4970-8122-463ba243a583	98.777	4008	16	22	1	4000	14877	18859	0	7099
ctg6(+)>ctg1(-)	dfa6362b-73fa-4728-a9a9-ed437b594e5d	98.752	4007	21	22	1	4000	16499	12515	0	7095
ctg6(+)>ctg1(-)	88aafd89-e73d-498f-9445-13f64294ea3c	98.658	4025	10	31	1	4000	10384	14389	0	7094
ctg6(+)>ctg1(-)	e304899e-9103-4b5a-959b-8fcbcf1d92d3	98.703	4009	21	23	1	4000	7272	11258	0	7086
ctg6(+)>ctg1(-)	1fa29b3d-970a-4247-93a3-0120df6faac3	98.655	4015	23	27	1	4000	20402	24400	0	7086
ctg6(+)>ctg1(-)	7f99467a-f287-4e63-ae55-879de098a01b	98.655	4014	19	29	1	4000	3219	7211	0	7081
ctg6(+)>ctg1(-)	1d9b9685-78ca-4480-9765-75fa9a6c40ea	98.654	4013	19	26	1	4000	13814	9824	0	7079
ctg6(+)>ctg1(-)	be6cdfde-c3a7-4fa5-9495-947924c1568a	98.653	4010	25	22	1	4000	4917	927	0	7079
ctg6(+)>ctg1(-)	7c2a7b25-d05b-4fd0-b086-b175051f8359	98.679	4012	14	18	1	4000	27790	31774	0	7079
ctg6(+)>ctg1(-)	43835130-f7d4-4a36-816a-8b033a4f00a4	98.629	4013	24	25	1	4000	24810	20816	0	7077
ctg6(+)>ctg1(-)	00f5342e-82c6-4650-b7c6-1dfb5d9a89ed	98.606	4017	17	26	1	4000	9432	13426	0	7071
ctg6(+)>ctg1(-)	47a08d16-4ec7-4d8f-b6db-0c229da7e21e	98.676	4004	21	22	1	4000	4753	8728	0	7071
ctg6(+)>ctg1(-)	1d668e84-a8ee-4e1c-9e48-f763071a3d86	98.507	4019	26	27	1	4000	1590	5593	0	7059
ctg6(+)>ctg1(-)	f26e3a14-42c2-4d47-8d5f-ffa74e151ab9	98.579	4011	19	25	1	4000	1718	5701	0	7057
ctg6(+)>ctg1(-)	7f2e4b76-f15a-4eb1-9836-4328304c1e88	98.484	4023	19	28	1	4000	17624	13621	0	7053
ctg6(+)>ctg1(-)	085f9ce5-4b31-4c37-99f6-626226429b86	98.409	4022	33	26	1	4000	27763	23751	0	7044
ctg6(+)>ctg1(-)	2100ae3b-75fa-439f-b736-b6f073255fe0	98.503	4007	31	25	1	4000	12625	16609	0	7040
ctg6(+)>ctg1(-)	6aa98fc4-f8bd-4700-886e-8bd2951c159c	98.477	4006	31	23	1	4000	5037	9018	0	7033
ctg6(+)>ctg1(-)	e38acb80-f422-479d-a90c-07648d4aad5f	98.455	4012	21	28	1	4000	5040	9022	0	7027
ctg6(+)>ctg1(-)	637ba022-9b71-4ab2-90ef-a496d2322cd9	98.43	4014	22	28	1	4000	18270	14284	0	7025
ctg6(+)>ctg1(-)	eec90588-b1de-480c-bde8-1f80a2d403d5	98.431	4015	18	28	1	4000	10114	14098	0	7023
ctg6(+)>ctg1(-)	b142abd5-8cb4-4744-a60e-bb999e8754af	98.357	4018	29	26	1	4000	42016	46014	0	7020
ctg6(+)>ctg1(-)	672f364b-427b-4237-8170-fc8d2e3e9902	98.404	4010	25	29	1	4000	21674	25654	0	7014
ctg6(+)>ctg1(-)	fcc0f1a3-64a7-4330-88de-5cc03e128348	98.428	4007	19	29	1	4000	11218	7249	0	7011
ctg6(+)>ctg1(-)	7e0806db-1b13-4f6a-b09f-7da5094fec90	98.333	4020	19	33	1	4000	15032	11041	0	7009
ctg6(+)>ctg1(-)	e8b22373-38aa-4f89-a181-54a6b3591217	98.33	4012	35	26	1	4000	8312	12303	0	7009
ctg6(+)>ctg1(-)	cf1c9817-2b69-4db1-abf6-36cc983045e7	98.355	4013	22	31	1	4000	5157	9138	0	7005
ctg6(+)>ctg1(-)	e63f56b9-b1cc-461d-a703-68932890e349	98.355	4011	25	33	1	4000	13132	9152	0	7003
ctg6(+)>ctg1(-)	84d932b4-29f2-46c0-9ea1-305ee64d2e23	98.281	4013	36	28	1	4000	10159	14151	0	6998
ctg6(+)>ctg1(-)	8f10c310-c2d1-410c-9ab0-d1f6ccb13eb6	98.305	4011	29	32	1	4000	411	4393	0	6994
ctg6(+)>ctg1(-)	ac551887-0bda-4ca9-a01c-b6a3f9bb4c59	98.257	4017	23	36	1	4000	10129	14115	0	6986
ctg6(+)>ctg1(-)	fa3082fd-0f75-4415-b73d-53a283a5341a	98.255	4012	32	36	1	4000	17211	13226	0	6986
ctg6(+)>ctg1(-)	c0af3c1c-0461-456f-b20d-b906a94041f4	98.232	4016	26	28	1	4000	2800	6786	0	6981
ctg6(+)>ctg1(-)	3c4e4c49-2210-4647-8345-2f53839c6276	98.23	4012	20	31	1	4000	15226	11254	0	6968
ctg6(+)>ctg1(-)	895e6fc5-f4c0-4eda-884e-495e06ad7904	98.11	4021	27	35	1	4000	18354	22346	0	6959
ctg6(+)>ctg1(-)	d095250d-bd67-49f9-bd75-c099f1cd7034	98.082	4014	36	31	1	4000	4348	362	0	6948
ctg6(+)>ctg1(-)	8369b1c8-b799-4b7d-acf6-9d5e5641deb6	97.936	4021	42	35	1	4000	40532	36532	0	6927
ctg6(+)>ctg1(-)	7cf0593d-7a77-414a-ac2a-48ebfc587bb7	97.984	4018	28	44	1	4000	11560	7578	0	6922
ctg6(+)>ctg1(-)	bb11f262-d863-4612-8360-7c07f84dbec1	98.054	4008	27	31	1	4000	1385	5349	0	6922
ctg6(+)>ctg1(-)	d9324fad-f6bf-4778-a005-79755c1a7326	97.983	4015	31	36	1	4000	16896	12917	0	6920
ctg6(+)>ctg1(-)	9c4ca7ed-2493-4496-8131-4b4490ebd668	97.889	4026	35	42	1	4000	6723	10724	0	6918
ctg6(+)>ctg1(-)	a4dbd639-a3d6-4d9d-8afd-a2788a9bfdcf	97.957	4014	30	42	1	4000	14348	10373	0	6911
ctg6(+)>ctg1(-)	c39ef320-882c-49d9-8c27-886acb6edf39	97.862	4022	34	39	1	4000	12922	16913	0	6903
ctg6(+)>ctg1(-)	4b60a04e-c76b-4d4d-b3ab-929ec02abc66	97.884	4017	29	38	1	4000	22158	18181	0	6896
ctg6(+)>ctg1(-)	a71a95ac-b2ec-465a-a62f-4d3850914a70	97.855	4010	37	36	1	4000	11387	7417	0	6883
ctg6(+)>ctg1(-)	b1087f38-d94e-4b64-af8e-46a4e2e0dcb6	97.779	4008	42	39	1	4000	12540	8572	0	6865
ctg6(+)>ctg1(-)	6e40efe6-0ef3-4fbe-8a84-3ed11ecd88eb	97.71	4018	37	45	1	4000	8109	12089	0	6859
ctg6(+)>ctg1(-)	6a69b86e-7bc1-4577-9cb8-effa62bc3d3b	97.76	4018	20	45	1	4000	30985	27020	0	6857
ctg6(+)>ctg1(-)	2bf214dd-a454-4994-8c8f-77a769ca542f	97.567	4028	38	46	1	4000	40801	36806	0	6841
ctg6(+)>ctg1(-)	32b42044-718c-444b-8aed-35a6eedf662e	97.68	4008	37	40	1	4000	44386	40427	0	6835
ctg6(+)>ctg1(-)	02a81d65-b9fe-4a1c-985a-71b1dd1a8c4e	97.538	4021	37	43	1	4000	18041	22020	0	6820
ctg6(+)>ctg1(-)	48ee6197-26be-4b15-89f6-0fe7c224b97e	97.512	4020	42	50	1	4000	16908	12927	0	6817
ctg6(+)>ctg1(-)	eae83022-a908-4f00-8026-7b675c798fa0	97.396	4033	44	44	1	4000	3763	7767	0	6809
ctg6(+)>ctg1(-)	981b9789-a182-4504-b0a1-7ea53723cd25	97.393	4028	44	47	1	4000	3292	7286	0	6800
ctg6(+)>ctg1(-)	d91f5e39-546c-4b9f-9775-48e2ca91af64	97.391	4025	44	49	1	4000	1812	5800	0	6794
ctg6(+)>ctg1(-)	69a8ead8-40ac-42e3-9680-a600b4113248	97.437	4018	40	46	1	4000	4882	910	0	6791
ctg6(+)>ctg1(-)	67d60470-2f2b-4bd1-a4c5-3ca627f98589	97.238	4019	51	48	1	4000	11041	15018	0	6752
ctg6(+)>ctg1(-)	8ffabeef-a3dd-4d8e-8472-4c17820a2270	97.241	4023	42	52	1	4000	14780	10804	0	6750
ctg6(+)>ctg1(-)	f98a2be5-08cb-406f-b5e8-6082de72e1ac	97.211	4016	42	57	1	4000	5736	1775	0	6732
ctg6(+)>ctg1(-)	f3eaee37-d0c1-403e-bfb1-add1f4e65757	97.02	4027	44	58	1	4000	18617	14640	0	6702
ctg6(+)>ctg1(-)	566aa3ab-3e6c-400c-80b9-40b0e4897177	96.597	4026	54	57	1	4000	1197	5165	0	6599
ctg6(+)>ctg1(-)	fcdd1893-8dcc-4a4c-bf96-731403677c80	96.351	4029	72	53	1	4000	12758	8776	0	6556
ctg6(+)>ctg1(-)	c217f57a-68d4-43cf-8903-358b28dd5bbf	96.298	4025	63	65	1	4000	15795	11832	0	6529
ctg6(+)>ctg1(-)	0568e0e1-d758-44e0-8c0f-abeae1a353df	96.243	4019	72	63	1	4000	2582	6540	0	6512
ctg6(+)>ctg1(-)	c73bec9e-c129-4266-9a32-af1fb1ccadc5	96.2	4026	66	61	1	4000	1082	5046	0	6506
ctg6(+)>ctg1(-)	8c2c3a48-9821-4a06-9a4d-8eb9c29d24f2	95.98	4030	77	72	1	4000	7937	11911	0	6466
ctg6(+)>ctg1(-)	1ebeceef-8967-4bc6-a684-34b1186a7d03	93.972	4048	109	99	1	4000	13189	17149	0	5999
ctg6(+)>ctg1(-)	bb6c960b-07b2-478a-9ed4-fc73d8ba27f9	93.781	4036	129	97	1	4000	4982	8931	0	5951
ctg6(+)>ctg1(-)	a525df6d-2d7b-4bca-a7d1-21ccbd908ca0	91.854	4039	158	137	1	4000	8696	4790	0	5478
ctg6(+)>ctg3(-)	e72d678c-f837-4855-8caf-6d0dd62455b9	99.7	4003	3	9	1	4000	11952	15948	0	7317
ctg6(+)>ctg3(-)	8957c0fa-2fff-4816-9535-5187895f6abe	99.601	4008	3	8	1	4000	4025	8027	0	7300
ctg6(+)>ctg3(-)	63adad18-ef6a-4274-a860-5fc85833f234	99.426	4006	9	13	1	4000	11734	7737	0	7258
ctg6(+)>ctg3(-)	e482f3d2-cc44-41f6-8222-0b266868a0a8	99.451	4006	3	16	1	4000	333	4325	0	7258
ctg6(+)>ctg3(-)	47f1147b-8984-45fc-9b78-6e116eacc191	99.276	4006	13	14	1	4000	8692	12687	0	7223
ctg6(+)>ctg3(-)	3d8935de-d0eb-4649-be85-a724a40ccb9d	99.251	4008	10	15	1	4000	42938	38943	0	7217
ctg6(+)>ctg3(-)	86fa5f25-0557-4d6a-8cf1-c7a025cbdae1	99.202	4008	10	20	1	4000	1561	5554	0	7204
ctg6(+)>ctg3(-)	ea1db516-876d-4562-91ac-cbb47c211c50	99.201	4007	6	19	1	4000	8153	4166	0	7199
ctg6(+)>ctg3(-)	06e232c6-acaa-44a6-9b90-70a98d01e65e	99.077	4010	19	16	1	4000	11347	15348	0	7184
ctg6(+)>ctg3(-)	bc42048f-2879-42f9-80ee-ccf663bf48b3	99.027	4009	18	17	1	4000	1751	5747	0	7167
ctg6(+)>ctg3(-)	5d0b16d0-b73d-47c3-91ee-a279a9f68860	99.052	4009	9	22	1	4000	27878	23890	0	7166
ctg6(+)>ctg3(-)	a7184764-b95f-409d-9924-775a3e582e8b	99.027	4009	12	20	1	4000	10115	6125	0	7162
ctg6(+)>ctg3(-)	3ea83ac2-507e-44c2-97ca-a4bf9d60f744	98.977	4008	11	23	1	4000	50601	46616	0	7147
ctg6(+)>ctg3(-)	dba7e4c2-de72-4666-9b23-63a5749efc9b	98.904	4016	12	26	1	4000	18493	14494	0	7143
ctg6(+)>ctg3(-)	12493a6f-3dd8-42d9-87f3-5c76ed753457	98.88	4018	12	23	1	4000	6721	10723	0	7140
ctg6(+)>ctg3(-)	959f198c-ffff-474b-823c-0e62e009dba4	98.878	4010	24	19	1	4000	25794	21796	0	7136
ctg6(+)>ctg3(-)	e328e3d1-c823-4711-926b-4de251f1c019	98.878	4010	16	22	1	4000	17841	21831	0	7129
ctg6(+)>ctg3(-)	ab0da4b6-c0e6-436a-9531-bde78ee99dba	98.878	4010	13	26	1	4000	12319	8332	0	7127
ctg6(+)>ctg3(-)	d7ca303c-a682-4309-b717-56de4b824e0f	98.829	4012	19	24	1	4000	24979	20984	0	7123
ctg6(+)>ctg3(-)	f3cca557-c6e3-4e45-9a61-ad3dcb72406d	98.829	4013	17	22	1	4000	10097	14092	0	7123
ctg6(+)>ctg3(-)	6d0dc661-6a33-4ae1-87fe-94ba89b6a13f	98.853	4009	17	21	1	4000	13221	9233	0	7121
ctg6(+)>ctg3(-)	2bde5984-cb20-456a-9f69-21440b790995	98.804	4014	20	19	1	4000	8045	4046	0	7121
ctg6(+)>ctg3(-)	31fcb15b-c415-40a0-88e6-54ac7c557044	98.877	4006	11	23	1	4000	18220	22197	0	7118
ctg6(+)>ctg3(-)	9eba42eb-c1af-434f-9801-6eca054a40a0	98.804	4015	14	23	1	4000	35199	31204	0	7118
ctg6(+)>ctg3(-)	34b1ee9c-4cbf-438f-bf0c-3914edce8293	98.803	4010	20	22	1	4000	37404	33413	0	7114
ctg6(+)>ctg3(-)	9de8b7c2-491d-4102-989b-3a15164555c5	98.753	4010	20	25	1	4000	8091	12080	0	7101
ctg6(+)>ctg3(-)	9e89a843-eea5-45b2-a78e-39960dd6a8df	98.753	4010	15	28	1	4000	12091	8107	0	7095
ctg6(+)>ctg3(-)	391e13a1-b735-46c3-a9c8-74612712a934	98.777	4008	9	27	1	4000	12188	8213	0	7094
ctg6(+)>ctg3(-)	a55fb8a4-bac2-4741-89d8-608f01405af2	98.656	4018	19	29	1	4000	7675	3675	0	7088
ctg6(+)>ctg3(-)	db235edf-ca9c-4f15-a488-3bf762ffe263	98.704	4012	14	29	1	4000	3677	7662	0	7086
ctg6(+)>ctg3(-)	e3123226-3177-485d-8a6f-7b8e93e5eb58	98.654	4012	20	29	1	4000	527	4516	0	7079
ctg6(+)>ctg3(-)	4b3fc862-f0d6-411f-8e0d-88a9a8e404a8	98.604	4012	25	19	1	4000	8370	12362	0	7070
ctg6(+)>ctg3(-)	4c5eea9e-1d46-494b-939b-dea138af0480	98.53	4014	24	25	1	4000	1527	5519	0	7053
ctg6(+)>ctg3(-)	187904f7-746d-430a-894a-54f9017461f7	98.553	4009	25	24	1	4000	16908	20892	0	7051
ctg6(+)>ctg3(-)	5de1437a-6bf1-477c-81b5-e716242fec02	98.53	4013	24	28	1	4000	4055	65	0	7051
ctg6(+)>ctg3(-)	abc0c195-fca9-48f5-8bc5-844ac1740878	98.508	4021	15	32	1	4000	14239	10243	0	7051
ctg6(+)>ctg3(-)	8ff28e80-4c79-4e24-8c3c-bac17706b818	98.553	4008	25	26	1	4000	5765	1783	0	7049
ctg6(+)>ctg3(-)	89da560f-7a89-432f-8468-34216295e519	98.504	4012	25	28	1	4000	16310	20298	0	7044
ctg6(+)>ctg3(-)	27fd312d-4c3c-4f56-9063-e4a195f6abd7	98.482	4019	16	29	1	4000	29672	25680	0	7042
ctg6(+)>ctg3(-)	7bcc16bf-1b0b-4d2e-a384-c0af075c3f80	98.455	4014	10	29	1	4000	9439	5464	0	7022
ctg6(+)>ctg3(-)	87a0be49-e759-49a1-9b72-3dd33d96878f	98.429	4009	28	28	1	4000	44054	40072	0	7022
ctg6(+)>ctg3(-)	9f1e8009-6966-4480-8b83-8f519a66d50e	98.429	4009	26	27	1	4000	1625	5605	0	7020
ctg6(+)>ctg3(-)	ff3a3574-5175-4bda-a473-d9956ec8ee85	98.381	4016	23	24	1	4000	11645	7656	0	7018
ctg6(+)>ctg3(-)	6fa01c91-8d0a-4e05-95a6-e2ef1356fc6a	98.378	4008	27	30	1	4000	911	4888	0	7007
ctg6(+)>ctg3(-)	3ad9265f-f58c-403b-a6f8-5fd3e303084a	98.328	4006	38	26	1	4000	19833	15851	0	6999
ctg6(+)>ctg3(-)	dd06047e-dbb1-4d04-ac65-bb1d3b794050	98.378	4007	19	29	1	4000	2664	6631	0	6998
ctg6(+)>ctg3(-)	cf53929b-aa0a-46f1-95ec-4388d3bb871d	98.306	4014	26	32	1	4000	8036	12021	0	6998
ctg6(+)>ctg3(-)	dbd005bf-e5e5-4cfc-bdce-d6cb6e474954	98.281	4013	22	35	1	4000	43700	47678	0	6985
ctg6(+)>ctg3(-)	53780e54-f841-4b89-9bb5-c7e6613a49ad	98.136	4023	28	36	1	4000	9067	13065	0	6970
ctg6(+)>ctg3(-)	a3af8f13-a30e-4417-9e7c-500df099014b	98.279	4009	14	32	1	4000	3990	7952	0	6970
ctg6(+)>ctg3(-)	6ce5a993-662c-429a-b1ac-7dcaaed7454a	98.159	4019	22	36	1	4000	23826	19841	0	6964
ctg6(+)>ctg3(-)	789735f0-074a-45b3-8a51-1b4b82d05608	98.203	4007	22	32	1	4000	5660	9623	0	6955
ctg6(+)>ctg3(-)	eb81a484-86f6-46a2-af56-951b74a925b7	98.177	4005	25	37	1	4000	11060	7099	0	6948
ctg6(+)>ctg3(-)	7c2f64cc-6b64-48e5-8222-c798f3fbadf6	98.131	4013	20	37	1	4000	5655	1685	0	6944
ctg6(+)>ctg3(-)	8ad445bd-01fd-4d82-b6c2-f84e0e13df13	98.081	4013	25	39	1	4000	7913	11886	0	6937
ctg6(+)>ctg3(-)	c6f34998-2003-4c6b-9ca5-2e5539502f82	97.983	4015	30	35	1	4000	20803	16825	0	6918
ctg6(+)>ctg3(-)	c4209c1b-2446-4180-a420-cbc50a1b876d	97.958	4015	36	31	1	4000	961	4944	0	6918
ctg6(+)>ctg3(-)	6f52b859-51a5-495c-9e8a-40a2291207c3	97.883	4016	45	36	1	4000	558	4549	0	6909
ctg6(+)>ctg3(-)	fbafd6ae-426b-4266-9644-0dc34f8bac9a	97.956	4011	33	39	1	4000	14820	10848	0	6907
ctg6(+)>ctg3(-)	18f22a67-b84d-4f88-9584-b0ba34d510c0	97.954	4007	34	25	1	4000	2046	6011	0	6902
ctg6(+)>ctg3(-)	0a8d5de2-2a1b-4e85-83a2-180ad4c313a4	97.836	4020	38	38	1	4000	10422	14412	0	6896
ctg6(+)>ctg3(-)	6ff518be-7509-4d40-b873-8f048dd391e7	97.857	4014	32	40	1	4000	46027	42054	0	6887
ctg6(+)>ctg3(-)	519e90fb-bada-4fd1-a8d7-7c80e3c90bbc	97.76	4018	37	43	1	4000	4404	422	0	6872
ctg6(+)>ctg3(-)	28404053-c54f-44e3-9267-51f29e0194fb	97.71	4018	41	44	1	4000	19370	23354	0	6863
ctg6(+)>ctg3(-)	48ce6f76-a5f2-4317-b614-48fd0357c8ea	97.637	4020	47	37	1	4000	19316	15325	0	6854
ctg6(+)>ctg3(-)	17739139-42f3-4ffc-9053-48763200db1a	97.687	4020	34	42	1	4000	31	4011	0	6854
ctg6(+)>ctg3(-)	386baf57-4a3e-48c8-841d-627cdb2f30c9	97.583	4013	23	49	1	4000	4099	8050	0	6806
ctg6(+)>ctg3(-)	f4396f01-5181-41a3-86db-f0be5cfe65ff	97.465	4024	34	52	1	4000	9236	5257	0	6804
ctg6(+)>ctg3(-)	41ba78aa-6936-4577-84f5-5f9a435d923f	97.34	4023	53	45	1	4000	7376	11367	0	6787
ctg6(+)>ctg3(-)	360bc13d-810e-4e8f-a606-4f3037d7ef4b	97.315	4022	57	43	1	4000	1751	5743	0	6782
ctg6(+)>ctg3(-)	eba56903-8120-4b87-ba36-9ebeefeef908	97.261	4016	50	47	1	4000	27872	31843	0	6752
ctg6(+)>ctg3(-)	f145e852-a335-4539-a6e3-08975ac71504	97.095	4028	51	51	1	4000	3243	7232	0	6730
ctg6(+)>ctg3(-)	948a8b43-ef7c-42d0-8c69-dd18cce49afe	97.137	4017	46	51	1	4000	11548	15512	0	6717
ctg6(+)>ctg3(-)	ca41242a-5dab-4fa5-bec8-f93d11a1cde8	97.066	4022	43	54	1	4000	29679	25711	0	6704
ctg6(+)>ctg3(-)	a1a1f0d1-f752-4532-b406-7d931cd0acc4	96.92	4026	64	49	1	4000	18175	14184	0	6693
ctg6(+)>ctg3(-)	ccaef05c-5995-47fc-932c-5a12de1be073	96.664	4017	59	55	1	4000	13550	9592	0	6606
ctg6(+)>ctg3(-)	3e5a61ca-f742-4c5e-b737-83918bab9178	96.591	4019	61	59	1	4000	12999	9038	0	6593
ctg6(+)>ctg3(-)	31738e26-4153-441f-b581-cdb537f15ecc	96.476	4029	54	64	1	4000	19488	15519	0	6573
ctg6(+)>ctg3(-)	43dfdc9d-42e1-4241-8c18-7299086383ec	96.463	4015	61	65	1	4000	18724	22672	0	6553
ctg6(+)>ctg3(-)	b45354cc-f262-410f-b7aa-bee95fa662a6	96.069	4045	59	78	1	4000	20048	16059	0	6497
ctg6(+)>ctg3(-)	24be3aa3-99ae-4b5e-98a9-667b7693e4f0	96.141	4017	70	62	1	4000	12614	16562	0	6481
ctg6(+)>ctg3(-)	d9d3dbda-0889-4bca-a61e-fe2b96058d5c	95.776	4025	70	73	1	4000	5156	9105	0	6399
ctg6(+)>ctg3(-)	9017ce80-cac1-498e-b519-daa1b36d730f	95.574	4022	84	73	1	4000	21773	17824	0	6355
ctg6(+)>ctg3(-)	01d23ee7-99c7-4bb3-83df-c86f98a59118	89.053	4065	219	171	1	4000	7847	11750	0	4833
ctg6(+)>ctg3(-)	72347952-d0cc-4d23-971c-e3f88abbe302	86.465	4108	275	211	1	4000	10676	14610	0	4246
ctg6(-)>ctg1(+)	b8900b67-c68c-4cf1-920d-670a0de19d63	99.525	4004	5	12	1	4000	4400	407	0	7276
ctg6(-)>ctg1(+)	9943f0ef-cb41-4c99-bf4a-98c83f93605e	99.476	4008	6	12	1	4000	8393	12393	0	7271
ctg6(-)>ctg1(+)	bd700269-07d2-45c9-ae5e-8504f67ec932	99.5	4003	9	10	1	4000	15175	19169	0	7271
ctg6(-)>ctg1(+)	5fb7d034-1c7f-44da-b23d-9f653d34aa1f	99.476	4007	8	11	1	4000	12989	8989	0	7271
ctg6(-)>ctg1(+)	08ebc3e4-955e-4e5d-80a0-146dd0930207	99.5	4003	7	12	1	4000	13021	9029	0	7269
ctg6(-)>ctg1(+)	68fa6248-4402-4129-8c44-cf8b4ab7343d	99.351	4008	14	9	1	4000	6733	10736	0	7247
ctg6(-)>ctg1(+)	a4606ce5-9af0-46b7-8c57-89e970385519	99.376	4008	3	14	1	4000	9606	13599	0	7243
ctg6(-)>ctg1(+)	8fd0185b-b39d-4309-a645-1a7b299f1cb6	99.326	4005	11	11	1	4000	40551	36558	0	7232
ctg6(-)>ctg1(+)	d072cbee-622e-47f4-bced-c78e0287d539	99.252	4013	13	13	1	4000	6612	2604	0	7228
ctg6(-)>ctg1(+)	40754e6a-5359-4245-81f8-41092e51cd6f	99.276	4006	15	12	1	4000	13776	17773	0	7225
ctg6(-)>ctg1(+)	db75778d-e95c-4b48-bae8-35fce9b04d52	99.301	4004	10	14	1	4000	13270	17259	0	7223
ctg6(-)>ctg1(+)	11a5bd8f-b50a-40e4-9370-1b146f5cb1d5	99.252	4009	10	16	1	4000	6351	10348	0	7219
ctg6(-)>ctg1(+)	9017ce80-cac1-498e-b519-daa1b36d730f	99.252	4009	11	18	1	4000	32401	36399	0	7219
ctg6(-)>ctg1(+)	d4a6d545-b171-4d1f-ad84-ab354648baba	99.325	4000	7	16	1	4000	5481	1502	0	7219
ctg6(-)>ctg1(+)	e2902d26-858f-448c-89b2-9d7b34f5666c	99.252	4010	5	20	1	4000	14259	10265	0	7215
ctg6(-)>ctg1(+)	6fd25752-0e02-476a-9dec-51b5ba4edf1a	99.202	4011	13	15	1	4000	61	4063	0	7212
ctg6(-)>ctg1(+)	e77dc89a-667b-4359-a64c-613863a039cc	99.203	4014	6	17	1	4000	8493	12494	0	7212
ctg6(-)>ctg1(+)	eb81a484-86f6-46a2-af56-951b74a925b7	99.275	4001	11	11	1	4000	21685	25668	0	7212
ctg6(-)>ctg1(+)	844da9ed-9d49-43e2-812f-8040c2217c07	99.226	4006	12	14	1	4000	25135	21143	0	7208
ctg6(-)>ctg1(+)	176ebd3c-3d1f-4485-8816-63641fe70b09	99.202	4009	9	17	1	4000	12717	16711	0	7204
ctg6(-)>ctg1(+)	dbd005bf-e5e5-4cfc-bdce-d6cb6e474954	99.176	4007	14	15	1	4000	33070	29076	0	7199
ctg6(-)>ctg1(+)	afdc7e41-21fa-4c27-a956-56d77bf82245	99.177	4009	9	20	1	4000	17864	13871	0	7199
ctg6(-)>ctg1(+)	4063d8e8-124d-4b78-b4b4-1b3035968f46	99.176	4007	14	15	1	4000	19111	15117	0	7199
ctg6(-)>ctg1(+)	c9b43acb-a6a7-414b-8850-c4191512b420	99.128	4012	13	15	1	4000	5544	1543	0	7195
ctg6(-)>ctg1(+)	1fa29b3d-970a-4247-93a3-0120df6faac3	99.177	4008	4	18	1	4000	9767	5781	0	7191
ctg6(-)>ctg1(+)	533cbf61-ea21-46fb-a4a7-824d98f71f3a	99.102	4009	13	19	1	4000	3794	7788	0	7182
ctg6(-)>ctg1(+)	3a5e6610-4117-4b26-be1c-a5f3fc7d535d	99.126	4003	13	18	1	4000	3975	7958	0	7179
ctg6(-)>ctg1(+)	e63f56b9-b1cc-461d-a703-68932890e349	99.077	4007	19	16	1	4000	23750	27745	0	7179
ctg6(-)>ctg1(+)	d7bd8f38-3fb5-4a3b-aba0-abcdb953518f	99.102	4010	7	22	1	4000	5569	1579	0	7179
ctg6(-)>ctg1(+)	b2e45a8e-036b-4969-9f81-2af63f4b7933	99.052	4009	18	17	1	4000	1610	5607	0	7175
ctg6(-)>ctg1(+)	b7778c56-2036-4c20-bc6e-aa82b6ad79f3	99.028	4013	15	22	1	4000	24866	20865	0	7173
ctg6(-)>ctg1(+)	9e89a843-eea5-45b2-a78e-39960dd6a8df	99.077	4008	11	18	1	4000	22734	26723	0	7173
ctg6(-)>ctg1(+)	fb26e544-88b9-468f-9da9-276e73617274	99.029	4015	10	24	1	4000	11239	15239	0	7171
ctg6(-)>ctg1(+)	271944e4-e024-46cc-9641-d5b3761957b2	99.027	4010	20	15	1	4000	7392	3392	0	7171
ctg6(-)>ctg1(+)	6529a693-d250-455b-b4c1-6583ca5ca515	99.052	4010	13	24	1	4000	5020	1026	0	7171
ctg6(-)>ctg1(+)	b0b582a9-f82b-4650-968c-ba24177d2ac7	99.076	4004	18	15	1	4000	5843	1855	0	7171
ctg6(-)>ctg1(+)	55e33714-8884-4df4-a7d6-99e87ed3dc5e	99.003	4014	14	20	1	4000	3782	7783	0	7167
ctg6(-)>ctg1(+)	1e775639-0846-4715-893f-2f1671f4d4d8	99.003	4013	15	20	1	4000	5073	1073	0	7166
ctg6(-)>ctg1(+)	15b77e2c-a2a6-4fe9-8687-da83a083209c	99.027	4008	16	17	1	4000	881	4873	0	7164
ctg6(-)>ctg1(+)	eceb5bf0-890f-4e62-b96e-20840544df36	99.003	4012	12	15	1	4000	13145	17140	0	7162
ctg6(-)>ctg1(+)	f77a3049-e00b-48b3-bc1d-d6f7ea7115c5	99.028	4011	8	24	1	4000	41799	45789	0	7162
ctg6(-)>ctg1(+)	51ee5b86-3897-4bd8-bb86-51f26a4a1a9d	99.003	4012	12	22	1	4000	4041	46	0	7162
ctg6(-)>ctg1(+)	d1340bb1-1563-4ef7-abc9-48f7eef13892	98.978	4012	18	18	1	4000	25503	21503	0	7160
ctg6(-)>ctg1(+)	0359181f-bb78-4115-a11e-10879b7e0630	98.979	4014	14	16	1	4000	5561	9561	0	7160
ctg6(-)>ctg1(+)	31fcb15b-c415-40a0-88e6-54ac7c557044	99.002	4009	15	18	1	4000	7601	3609	0	7158
ctg6(-)>ctg1(+)	263cd16c-b928-45db-b2cf-08b30cfe56b8	99.002	4009	12	19	1	4000	11174	15163	0	7156
ctg6(-)>ctg1(+)	2da5530e-cb29-4970-8122-463ba243a583	98.978	4011	15	21	1	4000	4265	270	0	7156
ctg6(-)>ctg1(+)	1e881319-14c6-4e5a-bc21-dc4dd4d836a7	99.026	4003	17	17	1	4000	9749	13732	0	7156
ctg6(-)>ctg1(+)	932ec07d-d5c9-4e4d-a905-c5a00187613b	99.026	4006	9	16	1	4000	12325	8344	0	7155
ctg6(-)>ctg1(+)	764a6215-0daf-4738-8996-12b7e2823153	99.026	4003	14	18	1	4000	4030	50	0	7153
ctg6(-)>ctg1(+)	f8d13013-3712-42af-b094-193c153cc820	98.976	4005	23	15	1	4000	4001	7992	0	7153
ctg6(-)>ctg1(+)	406f7492-95a7-4185-b4a1-f322421b234a	98.977	4006	18	20	1	4000	16117	20105	0	7149
ctg6(-)>ctg1(+)	78d2cd8a-5811-4083-89c5-aae264284ada	98.928	4011	19	19	1	4000	2860	6857	0	7147
ctg6(-)>ctg1(+)	e1a2ddd3-8a3c-4500-86e0-6c2eeb4ef03b	98.976	4005	17	18	1	4000	8939	12924	0	7147
ctg6(-)>ctg1(+)	51b1dfd1-e20a-43db-99eb-aa791fcc34ac	99.001	4005	9	22	1	4000	5816	9794	0	7145
ctg6(-)>ctg1(+)	fc5cb5f3-b916-45be-82ca-2abb612bad31	98.952	4009	15	23	1	4000	14554	18544	0	7145
ctg6(-)>ctg1(+)	a8f59b16-dccb-45af-8815-28e8049548a5	98.953	4010	6	29	1	4000	2027	6010	0	7140
ctg6(-)>ctg1(+)	08f10db7-a751-4f67-ab04-2b92e7bcf20a	98.927	4006	19	20	1	4000	18423	14436	0	7138
ctg6(-)>ctg1(+)	cc08466b-af62-4475-83bc-d82edc4003dd	98.902	4009	19	18	1	4000	7438	11430	0	7136
ctg6(-)>ctg1(+)	ce4cad60-8f21-4dea-ad9b-2a67b0246765	98.902	4007	22	14	1	4000	6220	2229	0	7136
ctg6(-)>ctg1(+)	48550f86-7bf8-4400-940d-2630aa5ee6f2	98.879	4015	14	25	1	4000	4485	487	0	7136
ctg6(-)>ctg1(+)	3ad9265f-f58c-403b-a6f8-5fd3e303084a	98.925	4001	25	14	1	4000	30441	34424	0	7134
ctg6(-)>ctg1(+)	9884d23b-59d7-46c4-8cb5-c718a2de31ab	98.903	4011	10	31	1	4000	14146	18133	0	7132
ctg6(-)>ctg1(+)	1c1ce9ee-1e9e-4381-b7cc-afcac753750d	98.853	4012	20	21	1	4000	7090	11087	0	7131
ctg6(-)>ctg1(+)	57258452-138a-4aad-afac-3a246947690a	98.853	4011	18	16	1	4000	27673	23680	0	7127
ctg6(-)>ctg1(+)	b142abd5-8cb4-4744-a60e-bb999e8754af	98.877	4008	17	22	1	4000	31375	27388	0	7127
ctg6(-)>ctg1(+)	dfe7b4be-b4ff-4b2b-b5ca-ec12a162b7cd	98.902	4006	14	25	1	4000	21336	17355	0	7127
ctg6(-)>ctg1(+)	6f685eca-c808-48ad-ba85-00d464561b0d	98.878	4010	13	23	1	4000	18917	22904	0	7127
ctg6(-)>ctg1(+)	293218b6-cd81-415a-af49-c0753462c9b4	98.877	4006	19	23	1	4000	10763	6778	0	7125
ctg6(-)>ctg1(+)	187904f7-746d-430a-894a-54f9017461f7	98.876	4004	18	21	1	4000	6290	2310	0	7119
ctg6(-)>ctg1(+)	aea50c7d-c1b5-41f3-9ff9-a02c08a07631	98.827	4007	18	22	1	4000	13355	17339	0	7112
ctg6(-)>ctg1(+)	79aa8220-fa08-4a9c-bb2c-27048864f6de	98.78	4016	11	27	1	4000	12643	16636	0	7110
ctg6(-)>ctg1(+)	effa6ba1-8d10-476c-a3b2-2434cb3dccf2	98.755	4015	19	21	1	4000	7720	11718	0	7108
ctg6(-)>ctg1(+)	86b56b30-1675-4967-8374-8aa2eb09e85d	98.778	4011	20	23	1	4000	38218	34226	0	7108
ctg6(-)>ctg1(+)	466983e0-98a0-45db-81d4-3fe0b75fa407	98.826	4004	19	25	1	4000	386	4365	0	7108
ctg6(-)>ctg1(+)	049ef7bd-f0b2-4eb9-b928-e5407ce5b84a	98.779	4012	18	26	1	4000	14095	10103	0	7108
ctg6(-)>ctg1(+)	fc08eae4-fdf8-43a4-b1f7-dac0fec686d5	98.826	4002	22	18	1	4000	2035	6013	0	7107
ctg6(-)>ctg1(+)	36256a0e-2323-4baf-b19c-945af664d203	98.729	4012	27	20	1	4000	18937	14938	0	7105
ctg6(-)>ctg1(+)	14b783be-f21a-4d21-9547-ebdefb814112	98.729	4013	26	22	1	4000	5277	9277	0	7105
ctg6(-)>ctg1(+)	e565aaba-408b-4081-8de6-72797992eb54	98.729	4013	23	23	1	4000	7772	3775	0	7103
ctg6(-)>ctg1(+)	d928a51a-4245-4b9f-b28f-d1aafd27c542	98.706	4017	19	24	1	4000	8459	4459	0	7099
ctg6(-)>ctg1(+)	2fec538b-e89c-4e1c-9fe1-aa45d0a61399	98.704	4012	14	29	1	4000	21334	25319	0	7086
ctg6(-)>ctg1(+)	41fdee5d-4e6f-45e4-9c60-82a3d14bfe4f	98.655	4015	18	27	1	4000	12011	8018	0	7083
ctg6(-)>ctg1(+)	6f7eae40-fe36-47b4-a8e5-61292ce32d16	98.607	4019	20	24	1	4000	954	4955	0	7079
ctg6(-)>ctg1(+)	7c2a7b25-d05b-4fd0-b086-b175051f8359	98.63	4016	19	26	1	4000	17237	13242	0	7079
ctg6(-)>ctg1(+)	f8af840e-a1cd-4328-b7db-46ee18430664	98.605	4015	24	22	1	4000	784	4781	0	7075
ctg6(-)>ctg1(+)	eb1e0905-fbb6-4b16-8d29-c99d00aef6f6	98.629	4012	23	24	1	4000	11773	7782	0	7075
ctg6(-)>ctg1(+)	9712dfc8-880c-4ec1-931a-b677ca9a7e64	98.653	4010	16	27	1	4000	51661	47680	0	7071
ctg6(-)>ctg1(+)	e3dc1ded-bd6d-492f-97eb-bdef2d1f6d6a	98.557	4019	24	28	1	4000	11843	15846	0	7070
ctg6(-)>ctg1(+)	fef5d745-bafd-4514-969f-de507aefc4be	98.582	4019	18	33	1	4000	4129	131	0	7070
ctg6(-)>ctg1(+)	3d8935de-d0eb-4649-be85-a724a40ccb9d	98.603	4010	26	22	1	4000	53559	57548	0	7068
ctg6(-)>ctg1(+)	4551d018-3401-462d-a7b8-b1aa1e697c95	98.581	4017	18	29	1	4000	30606	26612	0	7066
ctg6(-)>ctg1(+)	87721fbb-651e-4999-a991-e9fa9bdcc94d	98.58	4015	21	25	1	4000	10066	6073	0	7066
ctg6(-)>ctg1(+)	43835130-f7d4-4a36-816a-8b033a4f00a4	98.627	4006	24	25	1	4000	35439	39419	0	7064
ctg6(-)>ctg1(+)	a0d87c22-34b9-4922-b6d3-9a1feb595187	98.58	4014	22	28	1	4000	14023	18015	0	7064
ctg6(-)>ctg1(+)	89da560f-7a89-432f-8468-34216295e519	98.555	4014	23	27	1	4000	5691	1699	0	7059
ctg6(-)>ctg1(+)	ddfd9ee8-06c2-4d65-9f4e-2765b69331bc	98.507	4020	24	30	1	4000	21031	17028	0	7059
ctg6(-)>ctg1(+)	e4973819-6a85-4f98-9ecf-12ca26355c05	98.579	4010	21	27	1	4000	8640	12623	0	7057
ctg6(-)>ctg1(+)	931b4ff1-ac0a-44db-bf17-fb353cc9fab9	98.555	4014	19	26	1	4000	11889	7901	0	7055
ctg6(-)>ctg1(+)	00ebd012-dc8d-4265-95a0-73819ae7c547	98.504	4011	32	26	1	4000	6557	2564	0	7049
ctg6(-)>ctg1(+)	ab8d75d0-7019-4bdb-8a45-e4d22ede90ef	98.554	4011	19	31	1	4000	12150	16132	0	7049
ctg6(-)>ctg1(+)	30034d1f-e6a0-4da4-863a-6324c380586a	98.481	4016	26	27	1	4000	19519	15523	0	7046
ctg6(-)>ctg1(+)	c6f34998-2003-4c6b-9ca5-2e5539502f82	98.505	4013	22	28	1	4000	31375	35362	0	7044
ctg6(-)>ctg1(+)	732ea903-5365-49b9-aef3-687e961bc11f	98.529	4011	18	31	1	4000	6547	10527	0	7042
ctg6(-)>ctg1(+)	c6d10650-0dab-45eb-a52f-aa21cd84a7d9	98.456	4016	20	30	1	4000	20948	24937	0	7035
ctg6(-)>ctg1(+)	1ca1c454-c6dd-47f5-be23-f0f33e0e5c3e	98.453	4009	31	23	1	4000	4782	796	0	7031
ctg6(-)>ctg1(+)	15b51502-edb6-4f01-967c-73c98e43fbeb	98.384	4022	24	24	1	4000	3885	7887	0	7029
ctg6(-)>ctg1(+)	076981fe-5a58-413b-a0b8-1f3c4eb9e994	98.431	4016	22	29	1	4000	6928	10918	0	7029
ctg6(-)>ctg1(+)	be6cdfde-c3a7-4fa5-9495-947924c1568a	98.405	4012	21	32	1	4000	15532	19512	0	7014
ctg6(-)>ctg1(+)	4025d3c2-a696-483f-81f4-42afacf3fbee	98.38	4012	24	28	1	4000	12423	8441	0	7011
ctg6(-)>ctg1(+)	4b6cade7-9047-47ef-8b33-61797fc0c0cb	98.333	4018	25	36	1	4000	10101	14094	0	7011
ctg6(-)>ctg1(+)	0164843c-6a77-4da7-81f0-a4562c505021	98.333	4019	19	40	1	4000	5289	1300	0	7007
ctg6(-)>ctg1(+)	ecf1ec93-f9a8-4d96-bd7a-0b2a812626db	98.355	4011	26	25	1	4000	13861	17842	0	7005
ctg6(-)>ctg1(+)	28404053-c54f-44e3-9267-51f29e0194fb	98.284	4022	23	27	1	4000	8778	4781	0	7003
ctg6(-)>ctg1(+)	7b600e5a-1a21-481b-9fa9-a9c25d40ac58	98.307	4016	25	30	1	4000	23275	27263	0	6999
ctg6(-)>ctg1(+)	6ff518be-7509-4d40-b873-8f048dd391e7	98.306	4014	25	35	1	4000	56606	60590	0	6996
ctg6(-)>ctg1(+)	e3a321a8-b6ab-4ecb-aa6c-e93ae147c842	98.281	4014	32	27	1	4000	5395	9385	0	6996
ctg6(-)>ctg1(+)	3fe6707f-d1fe-496b-8cf2-833f009487a1	98.258	4019	25	36	1	4000	3788	7780	0	6992
ctg6(-)>ctg1(+)	07cb5a3f-5abc-4ee5-8e8c-56a34d24a254	98.258	4019	23	31	1	4000	9751	13741	0	6990
ctg6(-)>ctg1(+)	535fc435-5dab-4732-8116-23a3fd87abf7	98.21	4022	30	29	1	4000	31390	27389	0	6990
ctg6(-)>ctg1(+)	229ad4f1-09d3-4c04-8b8f-c4487ab311cc	98.256	4013	34	32	1	4000	4089	100	0	6990
ctg6(-)>ctg1(+)	6caf452e-125f-4fcf-9aee-d756ec75f8c0	98.327	4005	27	30	1	4000	26993	30962	0	6988
ctg6(-)>ctg1(+)	e328e3d1-c823-4711-926b-4de251f1c019	98.234	4020	26	31	1	4000	7232	3238	0	6988
ctg6(-)>ctg1(+)	ac3a271a-3379-47ca-ad2d-df31962077b9	98.233	4018	26	33	1	4000	28440	24450	0	6985
ctg6(-)>ctg1(+)	42cd3410-8864-4c7a-a5a3-092528576b4f	98.303	4007	27	24	1	4000	5401	9373	0	6985
ctg6(-)>ctg1(+)	1d79f6bf-78df-419f-bcb3-9ee48a662b6e	98.257	4016	23	34	1	4000	8621	4637	0	6985
ctg6(-)>ctg1(+)	542324a3-20a6-4bc5-834a-fc95d644d140	98.231	4013	29	33	1	4000	8918	12901	0	6979
ctg6(-)>ctg1(+)	8f299cba-ada7-4f0c-959d-ba2b4e2930fc	98.114	4030	23	40	1	4000	9935	5929	0	6972
ctg6(-)>ctg1(+)	d833b522-9ca2-424a-bd35-69139e33fe7b	98.253	4007	25	32	1	4000	11268	15236	0	6970
ctg6(-)>ctg1(+)	9beedc72-e6d3-40eb-8929-3a9c42336000	98.182	4015	28	35	1	4000	13707	9723	0	6968
ctg6(-)>ctg1(+)	811f2d94-bbbf-4da3-b89b-f47483ae1efc	98.158	4017	27	34	1	4000	13905	9919	0	6964
ctg6(-)>ctg1(+)	1fddbf9e-42ef-4af6-bfea-8f2fba33be45	98.128	4007	32	30	1	4000	9230	13200	0	6944
ctg6(-)>ctg1(+)	ea01c04b-3a41-49c8-a821-02d31bdcc23a	98.13	4011	24	39	1	4000	5806	9776	0	6944
ctg6(-)>ctg1(+)	6a69b86e-7bc1-4577-9cb8-effa62bc3d3b	98.082	4014	27	35	1	4000	41575	45552	0	6940
ctg6(-)>ctg1(+)	fcc0f1a3-64a7-4330-88de-5cc03e128348	98.107	4015	19	38	1	4000	21795	25767	0	6940
ctg6(-)>ctg1(+)	3aa64354-503c-4acf-b112-3a0042b435a2	98.035	4021	28	36	1	4000	8979	12969	0	6940
ctg6(-)>ctg1(+)	1abf3fd9-ff59-4ef4-8ddd-6b31c7ec5a1e	97.941	4031	31	37	1	4000	4576	8585	0	6937
ctg6(-)>ctg1(+)	7bef0b82-c67e-48ba-a61c-31c15c4523ef	98.007	4014	38	37	1	4000	39462	35477	0	6931
ctg6(-)>ctg1(+)	b1c5dce4-c538-4872-9469-521e4bd66915	98.006	4012	28	39	1	4000	7271	11242	0	6918
ctg6(-)>ctg1(+)	e79eb6f0-0d00-4c73-9c31-ece167648a0f	97.934	4017	37	37	1	4000	6956	10943	0	6916
ctg6(-)>ctg1(+)	9839bb4f-195e-43e2-806b-2d6b2cf7d5e7	97.928	4006	28	36	1	4000	10096	14052	0	6887
ctg6(-)>ctg1(+)	a03b7ae1-c8d2-4d92-a507-c8c542ccb97c	97.834	4016	32	38	1	4000	7654	3678	0	6883
ctg6(-)>ctg1(+)	04f56db3-9138-4337-9272-d09acaae2b20	97.692	4029	43	41	1	4000	5148	1141	0	6879
ctg6(-)>ctg1(+)	d977bf37-7b82-4282-a151-023c5a6bab43	97.694	4033	34	53	1	4000	17418	13412	0	6878
ctg6(-)>ctg1(+)	be52d402-c4e5-4040-9e12-9e5d280e70a7	97.855	4010	31	38	1	4000	8654	4690	0	6878
ctg6(-)>ctg1(+)	d9daf741-52d0-4f0d-b982-528fd0bb9e81	97.785	4018	29	44	1	4000	3827	7802	0	6872
ctg6(-)>ctg1(+)	2ff6f4d2-500f-426f-8d48-856b359d6045	97.738	4023	32	49	1	4000	1506	5492	0	6870
ctg6(-)>ctg1(+)	a1a1f0d1-f752-4532-b406-7d931cd0acc4	97.829	4008	28	48	1	4000	28750	32706	0	6865
ctg6(-)>ctg1(+)	f9693455-c54e-45c9-9586-ed4f4ae20f22	97.665	4026	39	40	1	4000	5336	1340	0	6863
ctg6(-)>ctg1(+)	eba56903-8120-4b87-ba36-9ebeefeef908	97.64	4025	44	41	1	4000	17255	13257	0	6859
ctg6(-)>ctg1(+)	da76b7ed-6d5f-4abf-91f6-1a1c1b26853e	97.688	4023	34	39	1	4000	9947	13933	0	6859
ctg6(-)>ctg1(+)	4199dac1-1a4a-4613-8823-87442c4f4de7	97.664	4024	34	43	1	4000	6972	10959	0	6855
ctg6(-)>ctg1(+)	02a81d65-b9fe-4a1c-985a-71b1dd1a8c4e	97.636	4018	34	44	1	4000	7440	3466	0	6837
ctg6(-)>ctg1(+)	aeb4fb90-ef57-4f59-991e-2e84d7bfe0e4	97.565	4025	38	40	1	4000	7625	3636	0	6835
ctg6(-)>ctg1(+)	8938432d-faf1-4e0d-84c1-c4079bdf8446	97.585	4016	45	43	1	4000	5260	1281	0	6831
ctg6(-)>ctg1(+)	8be07a3c-cc8a-47fb-8156-7eaa8628bf8e	97.516	4026	42	43	1	4000	15533	11540	0	6828
ctg6(-)>ctg1(+)	93a39406-0d25-46fd-9475-41625ead86f5	97.516	4026	39	45	1	4000	8575	12565	0	6824
ctg6(-)>ctg1(+)	43dfdc9d-42e1-4241-8c18-7299086383ec	97.444	4030	43	49	1	4000	8101	4102	0	6817
ctg6(-)>ctg1(+)	7f2e4b76-f15a-4eb1-9836-4328304c1e88	97.319	4029	45	53	1	4000	28267	32261	0	6783
ctg6(-)>ctg1(+)	fd5bc0c6-77b0-4dec-9edb-40a8922319ea	97.412	4019	37	51	1	4000	10534	6564	0	6783
ctg6(-)>ctg1(+)	672f364b-427b-4237-8170-fc8d2e3e9902	97.265	4022	51	49	1	4000	11033	7049	0	6763
ctg6(-)>ctg1(+)	699f9c78-19d2-4028-be1d-106ced8f91f4	97.065	4020	47	52	1	4000	16912	12944	0	6704
ctg6(-)>ctg1(+)	d1377e0d-406e-4712-a7f8-9e236d9ae76a	96.871	4027	53	52	1	4000	13308	17288	0	6671
ctg6(-)>ctg1(+)	7387dcc9-7041-4d40-ae9f-f593bc360d6e	96.828	4035	51	58	1	4000	19643	15651	0	6671
ctg6(-)>ctg1(+)	02cb8459-4aa2-4b47-882e-32c771f4fee1	96.872	4028	46	64	1	4000	17279	13304	0	6667
ctg6(-)>ctg1(+)	bbd2057d-244d-4de2-9a59-9a5feaf6b892	96.329	4032	66	60	1	4000	139	4120	0	6551
ctg6(-)>ctg1(+)	1dcbc04f-b214-43f6-bfcd-3869774a775d	95.72	4042	65	81	1	4000	22573	18598	0	6407
ctg6(-)>ctg1(+)	a7cd98f9-35ad-432e-997b-564e890da825	95.617	4038	84	73	1	4000	13664	9682	0	6390
ctg6(-)>ctg1(+)	6cedda82-7b4e-490f-a463-d43a1d68ebf8	95.255	4046	94	76	1	4000	12273	16266	0	6318
ctg6(-)>ctg1(+)	0dac3d11-675e-42e5-af1a-e40c47ff573b	95.404	4025	83	72	1	4000	4780	8727	0	6314
ctg6(-)>ctg1(+)	83e3134f-89bf-4138-903e-10fbb76f7635	95.194	4037	90	74	1	4000	5334	9303	0	6285
ctg6(-)>ctg1(+)	37d35515-ba51-490b-9e4c-cd132a51a4cd	94.958	4046	81	92	1	4000	25616	21648	0	6228
ctg6(-)>ctg1(+)	1672448a-2f98-489e-84dd-c6cb08476d6a	94.86	4027	96	84	1	4000	16262	20204	0	6187
ctg6(-)>ctg1(+)	2f3cf573-5b4c-4ee8-b497-090b39d7704b	93.001	4058	124	132	1	4000	6088	10043	0	5773
ctg6(-)>ctg1(+)	3cddce82-f9bc-45e1-b1d3-fc1349e14850	92.969	4039	127	122	1	4000	5855	9775	0	5740
ctg6(-)>ctg1(+)	014bd96d-c11a-451f-b2e1-874bd24dd619	92.141	4059	139	127	1	4000	16572	12635	0	5563
ctg6(-)>ctg1(+)	dd1f034e-68b2-4180-9499-2093d63dae16	91.458	4039	156	131	1	4000	8930	5042	0	5373

## Sheet: TableS2
Table S2 Dispersed repeat sequences in the organelle genome of E. chloranthoides.
Organelle	ID	Length	Type	The first repeating unit			The second repeating unit
				Position	Start	End	Position	Start	End
mitogeome	R1	10259	F	Contig 1	186655	196913	Contig 1	245448	255706
mitogeome	R2	3500	P	Contig 1	230146	233645	Contig 4	95767	99266
mitogeome	R3	1562	P	Contig 1	2379	3940	Contig 5	29823	31384
mitogeome	R4	430	F	Contig 1	265123	265552	Contig 4	107312	107741
mitogeome	R5	276	P	Contig 1	201926	202201	Contig 2	144003	144278
mitogeome	R6	235	F	Contig 5	8500	8734	Contig 5	36539	36773
mitogeome	R7	223	P	Contig 1	113808	114030	Contig 1	317258	317480
mitogeome	R8	213	F	Contig 1	311426	311638	Contig 3	50813	51025
mitogeome	R9	191	P	Contig 3	33137	33327	Contig 4	127419	127609
mitogeome	R10	168	F	Contig 1	196375	196542	Contig 1	255168	255335
mitogeome	R11	168	F	Contig 1	196375	196542	Contig 4	14732	14899
mitogeome	R12	168	F	Contig 1	255168	255335	Contig 4	14732	14899
mitogeome	R13	160	P	Contig 2	75961	76120	Contig 3	80373	80532
mitogeome	R14	117	P	Contig 3	27053	27169	Contig 4	68313	68429
mitogeome	R15	116	F	Contig 2	163029	163144	Contig 5	61678	61793
mitogeome	R16	111	F	Contig 2	163146	163256	Contig 5	61795	61905
mitogeome	R17	110	P	Contig 3	54418	54527	Contig 3	88737	88846
mitogeome	R18	98	P	Contig 2	27547	27644	Contig 3	16968	17065
mitogeome	R19	96	F	Contig 4	125668	125763	Contig 5	41026	41121
mitogeome	R20	93	F	Contig 1	196817	196909	Contig 1	255610	255702
mitogeome	R21	93	F	Contig 1	196817	196909	Contig 4	125751	125843
mitogeome	R22	93	F	Contig 1	255610	255702	Contig 4	125751	125843
mitogeome	R23	84	F	Contig 3	3533	3616	Contig 4	124289	124372
mitogeome	R24	83	P	Contig 3	38106	38188	Contig 1	185733	185815
mitogeome	R25	81	F	Contig 1	58977	59057	Contig 3	134385	134465
mitogeome	R26	79	F	Contig 3	86582	86660	Contig 4	63050	63128
mitogeome	R27	78	P	Contig 4	42048	42125	Contig 2	155841	155918
mitogeome	R28	74	F	Contig 1	8385	8458	Contig 3	155597	155670
mitogeome	R29	73	P	Contig 1	311255	311327	Contig 4	3948	4020
mitogeome	R30	73	F	Contig 1	186968	187040	Contig 1	245761	245833
mitogeome	R31	73	P	Contig 1	186968	187040	Contig 4	129160	129232
mitogeome	R32	73	P	Contig 1	245761	245833	Contig 4	129160	129232
mitogeome	R33	71	P	Contig 4	106042	106112	Contig 4	124355	124425
mitogeome	R34	70	F	Contig 1	311636	311705	Contig 3	51026	51095
mitogeome	R35	67	F	Contig 1	232293	232359	Contig 4	4114	4180
mitogeome	R36	67	P	Contig 1	232293	232359	Contig 4	97053	97119
mitogeome	R37	67	P	Contig 4	4114	4180	Contig 4	97053	97119
mitogeome	R38	64	F	Contig 1	74972	75035	Contig 3	9315	9378
mitogeome	R39	63	F	Contig 2	59841	59903	Contig 4	76259	76321
mitogeome	R40	63	P	Contig 1	183638	183700	Contig 3	150628	150690
mitogeome	R41	61	P	Contig 3	1835	1895	Contig 2	194011	194071
mitogeome	R42	61	P	Contig 3	153630	153690	Contig 1	112990	113050
mitogeome	R43	61	P	Contig 3	102022	102082	Contig 1	15672	15732
mitogeome	R44	60	F	Contig 1	96597	96656	Contig 1	96650	96709
mitogeome	R45	59	F	Contig 4	128708	128766	Contig 5	32562	32620
mitogeome	R46	59	P	Contig 2	130645	130703	Contig 3	71862	71920
mitogeome	R47	58	P	Contig 3	3527	3584	Contig 4	106127	106184
mitogeome	R48	55	F	Contig 3	21845	21899	Contig 4	153274	153328
mitogeome	R49	55	P	Contig 1	63560	63614	Contig 4	59290	59344
mitogeome	R50	54	P	Contig 2	130590	130643	Contig 3	71922	71975
mitogeome	R51	54	P	Contig 1	10181	10234	Contig 1	278038	278091
mitogeome	R52	52	P	Contig 3	3533	3584	Contig 4	106127	106178
mitogeome	R53	52	F	Contig 3	3533	3584	Contig 4	124289	124340
mitogeome	R54	52	P	Contig 4	106127	106178	Contig 4	124289	124340
mitogeome	R55	52	F	Contig 4	5441	5492	Contig 5	32714	32765
mitogeome	R56	52	F	Contig 3	3713	3764	Contig 3	25792	25843
mitogeome	R57	52	P	Contig 1	332118	332169	Contig 4	4006	4057
mitogeome	R58	51	P	Contig 2	56330	56380	Contig 4	14270	14320
mitogeome	R59	50	F	Contig 5	48543	48592	Contig 5	89496	89545
mitogeome	R60	50	P	Contig 2	130980	131029	Contig 3	71117	71166
mitogeome	R61	49	F	Contig 4	5387	5435	Contig 5	32659	32707
mitogeome	R62	49	F	Contig 4	4035	4083	Contig 4	15003	15051
mitogeome	R63	49	P	Contig 3	3620	3668	Contig 4	106034	106082
mitogeome	R64	49	P	Contig 4	148050	148098	Contig 1	308380	308428
mitogeome	R65	49	F	Contig 1	280337	280385	Contig 3	92721	92769
mitogeome	R66	49	F	Contig 1	93737	93785	Contig 1	118086	118134
mitogeome	R67	49	F	Contig 1	58997	59045	Contig 3	134405	134453
mitogeome	R68	49	F	Contig 1	58997	59045	Contig 4	148513	148561
mitogeome	R69	49	F	Contig 3	134405	134453	Contig 4	148513	148561
mitogeome	R70	48	P	Contig 2	176323	176370	Contig 4	33769	33816
mitogeome	R71	48	P	Contig 1	256369	256416	Contig 3	54520	54567
mitogeome	R72	47	F	Contig 1	231938	231984	Contig 4	4424	4470
mitogeome	R73	47	P	Contig 1	231938	231984	Contig 4	97428	97474
mitogeome	R74	47	P	Contig 4	4424	4470	Contig 4	97428	97474
mitogeome	R75	47	P	Contig 1	2802	2848	Contig 1	161350	161396
mitogeome	R76	47	P	Contig 1	2802	2848	Contig 5	30915	30961
mitogeome	R77	47	F	Contig 1	161350	161396	Contig 5	30915	30961
mitogeome	R78	46	F	Contig 1	244577	244622	Contig 3	51633	51678
mitogeome	R79	45	F	Contig 1	12794	12838	Contig 5	34960	35004
mitogeome	R80	45	F	Contig 1	8272	8316	Contig 3	155465	155509
mitogeome	R81	44	P	Contig 5	56779	56822	Contig 5	56779	56822
mitogeome	R82	44	F	Contig 4	107278	107321	Contig 5	31568	31611
mitogeome	R83	44	F	Contig 4	4593	4636	Contig 4	4698	4741
mitogeome	R84	44	F	Contig 2	130404	130447	Contig 5	31612	31655
mitogeome	R85	44	F	Contig 1	225777	225820	Contig 1	241854	241897
mitogeome	R86	43	P	Contig 3	51911	51953	Contig 4	17674	17716
mitogeome	R87	43	F	Contig 2	194057	194099	Contig 5	97032	97074
mitogeome	R88	43	P	Contig 1	186098	186140	Contig 2	60658	60700
mitogeome	R89	43	F	Contig 1	18504	18546	Contig 3	142685	142727
mitogeome	R90	42	F	Contig 3	112810	112851	Contig 4	39771	39812
mitogeome	R91	42	P	Contig 1	2767	2808	Contig 1	161397	161438
mitogeome	R92	42	P	Contig 1	2767	2808	Contig 5	30955	30996
mitogeome	R93	42	F	Contig 1	161397	161438	Contig 5	30955	30996
mitogeome	R94	41	P	Contig 4	106042	106082	Contig 3	3620	3660
mitogeome	R95	41	P	Contig 4	106042	106082	Contig 4	124385	124425
mitogeome	R96	41	F	Contig 3	3620	3660	Contig 4	124385	124425
mitogeome	R97	41	P	Contig 5	96167	96207	Contig 1	283195	283235
mitogeome	R98	41	F	Contig 4	96556	96596	Contig 4	96637	96677
mitogeome	R99	41	P	Contig 4	96556	96596	Contig 1	232735	232775
mitogeome	R100	41	P	Contig 4	96556	96596	Contig 1	232816	232856
mitogeome	R101	41	P	Contig 4	96637	96677	Contig 1	232735	232775
mitogeome	R102	41	P	Contig 4	96637	96677	Contig 1	232816	232856
mitogeome	R103	41	F	Contig 1	232735	232775	Contig 1	232816	232856
mitogeome	R104	41	P	Contig 1	100730	100770	Contig 3	84806	84846
mitogeome	R105	41	F	Contig 1	41780	41820	Contig 1	121481	121521
mitogeome	R106	41	F	Contig 1	17094	17134	Contig 4	124585	124625
mitogeome	R107	40	P	Contig 3	135860	135899	Contig 4	128131	128170
mitogeome	R108	40	F	Contig 2	172557	172596	Contig 2	172584	172623
mitogeome	R109	40	P	Contig 2	75153	75192	Contig 3	70137	70176
mitogeome	R110	40	F	Contig 1	330379	330418	Contig 4	115270	115309
mitogeome	R111	40	P	Contig 6	1026	1065	Contig 1	29587	29626
mitogeome	R112	39	F	Contig 5	50060	50098	Contig 5	50151	50189
mitogeome	R113	39	F	Contig 1	334169	334207	Contig 3	151371	151409
mitogeome	R114	38	F	Contig 5	59047	59084	Contig 5	60081	60118
mitogeome	R115	38	F	Contig 4	125516	125553	Contig 5	58676	58713
mitogeome	R116	38	F	Contig 4	38435	38472	Contig 4	65509	65546
mitogeome	R117	38	F	Contig 1	260872	260909	Contig 1	260901	260938
mitogeome	R118	38	F	Contig 1	17097	17134	Contig 4	124588	124625
mitogeome	R119	38	F	Contig 1	17097	17134	Contig 4	125450	125487
mitogeome	R120	38	F	Contig 4	124588	124625	Contig 4	125450	125487
mitogeome	R121	38	F	Contig 1	4598	4635	Contig 2	104855	104892
mitogeome	R122	37	P	Contig 4	122233	122269	Contig 4	124450	124486
mitogeome	R123	37	F	Contig 4	5349	5385	Contig 5	32621	32657
mitogeome	R124	37	P	Contig 3	3411	3447	Contig 4	106264	106300
mitogeome	R125	37	F	Contig 1	93854	93890	Contig 1	118203	118239
mitogeome	R126	37	P	Contig 1	41841	41877	Contig 2	163439	163475
mitogeome	R127	37	P	Contig 1	23392	23428	Contig 2	147438	147474
mitogeome	R128	37	F	Contig 1	8460	8496	Contig 3	155672	155708
mitogeome	R129	36	F	Contig 2	12505	12540	Contig 5	8721	8756
mitogeome	R130	36	F	Contig 1	113741	113776	Contig 5	76401	76436
mitogeome	R131	35	F	Contig 3	134074	134108	Contig 4	149707	149741
mitogeome	R132	35	F	Contig 3	68441	68475	Contig 4	93494	93528
mitogeome	R133	35	F	Contig 1	330825	330859	Contig 4	40142	40176
mitogeome	R134	35	F	Contig 1	232699	232733	Contig 1	232780	232814
mitogeome	R135	35	P	Contig 1	232699	232733	Contig 4	96598	96632
mitogeome	R136	35	P	Contig 1	232699	232733	Contig 4	96679	96713
mitogeome	R137	35	P	Contig 1	232780	232814	Contig 4	96598	96632
mitogeome	R138	35	P	Contig 1	232780	232814	Contig 4	96679	96713
mitogeome	R139	35	F	Contig 4	96598	96632	Contig 4	96679	96713
mitogeome	R140	35	F	Contig 1	186789	186823	Contig 1	245582	245616
mitogeome	R141	35	F	Contig 1	186789	186823	Contig 3	52831	52865
mitogeome	R142	35	F	Contig 1	245582	245616	Contig 3	52831	52865
mitogeome	R143	35	F	Contig 1	112889	112923	Contig 5	8070	8104
mitogeome	R144	35	F	Contig 1	59059	59093	Contig 3	134467	134501
mitogeome	R145	35	P	Contig 1	11884	11918	Contig 1	186918	186952
mitogeome	R146	35	P	Contig 1	11884	11918	Contig 1	245711	245745
mitogeome	R147	35	F	Contig 1	186918	186952	Contig 1	245711	245745
mitogeome	R148	34	F	Contig 3	72975	73008	Contig 4	81623	81656
mitogeome	R149	34	F	Contig 2	150675	150708	Contig 2	151557	151590
mitogeome	R150	34	F	Contig 1	270555	270588	Contig 3	51895	51928
mitogeome	R151	34	P	Contig 4	69240	69273	Contig 1	241942	241975
mitogeome	R152	34	P	Contig 1	216701	216734	Contig 4	125658	125691
mitogeome	R153	34	F	Contig 3	38128	38161	Contig 4	130737	130770
mitogeome	R154	34	P	Contig 3	38128	38161	Contig 1	185760	185793
mitogeome	R155	34	P	Contig 4	130737	130770	Contig 1	185760	185793
mitogeome	R156	34	P	Contig 1	117240	117273	Contig 1	180684	180717
mitogeome	R157	34	F	Contig 1	58640	58673	Contig 1	92499	92532
mitogeome	R158	33	P	Contig 4	124486	124518	Contig 4	105972	106004
mitogeome	R159	33	P	Contig 4	148823	148855	Contig 3	134030	134062
mitogeome	R160	33	F	Contig 2	161700	161732	Contig 3	125954	125986
mitogeome	R161	33	F	Contig 1	331967	331999	Contig 3	114153	114185
mitogeome	R162	33	F	Contig 1	330077	330109	Contig 2	97605	97637
mitogeome	R163	33	P	Contig 1	301684	301716	Contig 5	71826	71858
mitogeome	R164	33	F	Contig 1	294246	294278	Contig 1	294337	294369
mitogeome	R165	33	P	Contig 1	240394	240426	Contig 1	330174	330206
mitogeome	R166	33	F	Contig 1	213149	213181	Contig 5	97699	97731
mitogeome	R167	33	P	Contig 2	44246	44278	Contig 1	96247	96279
mitogeome	R168	33	P	Contig 1	218145	218177	Contig 1	47794	47826
mitogeome	R169	33	P	Contig 4	98432	98464	Contig 1	43125	43157
mitogeome	R170	33	P	Contig 4	98432	98464	Contig 1	230948	230980
mitogeome	R171	33	F	Contig 1	43125	43157	Contig 1	230948	230980
mitogeome	R172	32	P	Contig 4	38431	38462	Contig 5	5130	5161
mitogeome	R173	32	F	Contig 3	108681	108712	Contig 4	115714	115745
mitogeome	R174	32	F	Contig 1	303621	303652	Contig 4	145526	145557
mitogeome	R175	32	P	Contig 1	302863	302894	Contig 3	105953	105984
mitogeome	R176	32	F	Contig 1	175716	175747	Contig 4	72525	72556
mitogeome	R177	32	P	Contig 1	173036	173067	Contig 5	5151	5182
mitogeome	R178	32	F	Contig 1	58928	58959	Contig 1	185534	185565
mitogeome	R179	32	F	Contig 1	3587	3618	Contig 1	278534	278565
mitogeome	R180	32	P	Contig 1	3587	3618	Contig 5	30145	30176
mitogeome	R181	32	P	Contig 1	278534	278565	Contig 5	30145	30176
mitogeome	R182	31	P	Contig 4	115108	115138	Contig 4	66181	66211
mitogeome	R183	31	F	Contig 3	134369	134399	Contig 4	148477	148507
mitogeome	R184	31	F	Contig 3	9457	9487	Contig 3	13402	13432
mitogeome	R185	31	F	Contig 3	3557	3587	Contig 4	124313	124343
mitogeome	R186	31	P	Contig 3	3557	3587	Contig 3	18685	18715
mitogeome	R187	31	P	Contig 4	124313	124343	Contig 3	18685	18715
mitogeome	R188	31	P	Contig 5	58730	58760	Contig 2	128802	128832
mitogeome	R189	31	F	Contig 1	332017	332047	Contig 4	115034	115064
mitogeome	R190	31	P	Contig 1	328518	328548	Contig 2	909	939
mitogeome	R191	31	P	Contig 1	301618	301648	Contig 5	71894	71924
mitogeome	R192	31	P	Contig 1	270494	270524	Contig 4	17763	17793
mitogeome	R193	31	F	Contig 1	217706	217736	Contig 1	218426	218456
mitogeome	R194	31	F	Contig 1	209199	209229	Contig 1	209950	209980
mitogeome	R195	31	P	Contig 1	206811	206841	Contig 2	70670	70700
mitogeome	R196	31	P	Contig 1	200861	200891	Contig 2	59205	59235
mitogeome	R197	31	F	Contig 1	159588	159618	Contig 4	32052	32082
mitogeome	R198	31	P	Contig 1	67416	67446	Contig 4	145477	145507
mitogeome	R199	31	F	Contig 1	12863	12893	Contig 5	35019	35049
mitogeome	R200	30	F	Contig 4	77786	77815	Contig 4	77815	77844
mitogeome	R201	30	P	Contig 4	4417	4446	Contig 4	19555	19584
mitogeome	R202	30	P	Contig 3	139360	139389	Contig 3	139360	139389
mitogeome	R203	30	F	Contig 3	27904	27933	Contig 4	125920	125949
mitogeome	R204	30	P	Contig 3	25847	25876	Contig 4	105925	105954
mitogeome	R205	30	P	Contig 5	3134	3163	Contig 2	128835	128864
mitogeome	R206	30	P	Contig 2	65829	65858	Contig 2	136176	136205
mitogeome	R207	30	P	Contig 2	84013	84042	Contig 2	38195	38224
mitogeome	R208	30	F	Contig 2	22811	22840	Contig 2	26637	26666
mitogeome	R209	30	F	Contig 1	329475	329504	Contig 1	329532	329561
mitogeome	R210	30	F	Contig 1	222665	222694	Contig 1	302861	302890
mitogeome	R211	30	F	Contig 1	203863	203892	Contig 1	309300	309329
mitogeome	R212	30	F	Contig 1	187083	187112	Contig 1	245876	245905
mitogeome	R213	30	F	Contig 1	187083	187112	Contig 4	33661	33690
mitogeome	R214	30	F	Contig 1	245876	245905	Contig 4	33661	33690
mitogeome	R215	30	P	Contig 1	157953	157982	Contig 3	154559	154588
mitogeome	R216	30	P	Contig 1	157952	157981	Contig 3	112858	112887
mitogeome	R217	30	P	Contig 1	127798	127827	Contig 5	44633	44662
mitogeome	R218	30	F	Contig 1	125091	125120	Contig 4	40535	40564
mitogeome	R219	30	F	Contig 1	80537	80566	Contig 4	27794	27823
mitogeome	R220	30	P	Contig 1	58737	58766	Contig 4	128055	128084
mitogeome	R221	30	F	Contig 1	55147	55176	Contig 1	190681	190710
mitogeome	R222	30	F	Contig 1	55147	55176	Contig 1	249474	249503
mitogeome	R223	30	F	Contig 1	190681	190710	Contig 1	249474	249503
mitogeome	R224	30	P	Contig 1	49921	49950	Contig 3	1323	1352
mitogeome	R225	30	P	Contig 4	49747	49776	Contig 1	17184	17213
chloroplast genome	R1	26640	P	cpDNA	86221	112860	cpDNA	131328	157967
chloroplast genome	R2	79	F	cpDNA	40207	40285	cpDNA	42431	42509
chloroplast genome	R3	66	P	cpDNA	54886	54951	cpDNA	54886	54951
chloroplast genome	R4	45	F	cpDNA	37604	37648	cpDNA	37624	37668
chloroplast genome	R5	40	P	cpDNA	14694	14733	cpDNA	14694	14733
chloroplast genome	R6	36	F	cpDNA	37482	37517	cpDNA	37500	37535
chloroplast genome	R7	36	P	cpDNA	14629	14664	cpDNA	14629	14664
chloroplast genome	R8	30	F	cpDNA	37587	37616	cpDNA	37601	37630

## Sheet: TableS3
Table S3. Tandem repeat sequences in the organelle genome of E. chloranthoides.
Mitochondrial genome	Indices	Period Size	Copy Number	Consensus Size	Percent Matches	Percent Indels	Score	A	C	G	T	Entropy (0-2)
mitogenome Contig 1	83745--83782	17	2.2	18	85	4	51	26	5	23	44	1.74
mitogenome Contig 1	96597--96714	53	2.2	53	98	1	229	21	27	12	38	1.89
mitogenome Contig 1	110203--110233	16	1.9	16	93	0	53	32	3	35	29	1.73
mitogenome Contig 1	119055--119080	13	2	13	100	0	52	15	15	23	46	1.83
mitogenome Contig 1	132753--132782	15	2	15	93	0	51	40	6	16	36	1.75
mitogenome Contig 1	147772--147799	13	2.2	13	100	0	56	28	7	14	50	1.69
mitogenome Contig 1	175615--175648	16	2.1	16	100	0	68	41	0	35	23	1.55
mitogenome Contig 1	179039--179076	17	2.2	18	86	13	53	34	10	13	42	1.78
mitogenome Contig 1	194468--194492	13	1.9	13	100	0	50	28	24	0	48	1.52
mitogenome Contig 1	231419--231450	15	2.1	15	94	0	55	34	28	34	3	1.73
mitogenome Contig 1	232699--232856	81	2	81	98	0	307	24	20	33	20	1.97
mitogenome Contig 1	253261--253285	13	1.9	13	100	0	50	28	24	0	48	1.52
mitogenome Contig 1	260851--260938	29	3	29	96	0	158	30	20	17	31	1.95
mitogenome Contig 1	279249--279311	21	3	21	84	9	83	33	22	22	22	1.97
mitogenome Contig 1	322283--322376	45	2.1	45	84	4	118	27	13	21	37	1.91
mitogenome Contig 1	322972--322997	13	2	13	100	0	52	38	0	30	30	1.58
mitogenome Contig 2	4931--4965	17	2.1	17	88	0	52	42	5	25	25	1.77
mitogenome Contig 2	9170--9208	12	3.2	12	92	0	60	10	41	10	38	1.73
mitogenome Contig 2	74896--74951	27	2.1	27	83	12	71	25	33	28	12	1.92
mitogenome Contig 2	135130--135161	16	2	16	100	0	64	37	18	6	37	1.76
mitogenome Contig 2	150898--150978	36	2.2	36	75	0	90	24	32	19	23	1.98
mitogenome Contig 2	172557--172623	27	2.5	27	100	0	134	5	40	20	32	1.77
mitogenome Contig 2	183105--183129	4	6.2	4	100	0	50	24	24	0	52	1.48
mitogenome Contig 3	61874--61899	12	2.2	12	100	0	52	30	26	7	34	1.85
mitogenome Contig 3	64579--64646	34	2	34	97	0	127	23	26	25	25	2
mitogenome Contig 3	122030--122106	38	2	38	94	0	136	36	11	37	14	1.82
mitogenome Contig 3	124488--124521	15	2.3	15	89	0	50	23	0	50	26	1.5
mitogenome Contig 3	153253--153294	21	2	21	100	0	84	28	19	14	38	1.9
mitogenome Contig 4	4593--4763	51	3.3	50	75	19	188	36	8	19	35	1.83
mitogenome Contig 4	4631--4712	27	3	27	92	3	139	35	10	19	34	1.87
mitogenome Contig 4	39970--40012	18	2.4	18	81	18	54	37	23	20	18	1.94
mitogenome Contig 4	51533--51563	6	5	6	92	7	53	16	35	0	48	1.46
mitogenome Contig 4	71317--71352	18	2	18	88	0	54	22	25	30	22	1.99
mitogenome Contig 4	77786--77844	29	2	29	100	0	118	13	20	13	52	1.74
mitogenome Contig 4	89614--89638	4	6.2	4	100	0	50	24	0	0	76	0.8
mitogenome Contig 4	96556--96713	81	2	81	98	0	307	20	33	20	24	1.97
mitogenome Contig 4	97962--97993	15	2.1	15	94	0	55	3	34	28	34	1.73
mitogenome Contig 4	101428--101477	25	2	25	100	0	100	16	32	16	36	1.9
mitogenome Contig 4	148623--148666	22	2	22	100	0	88	18	13	9	59	1.6
mitogenome Contig 4	154202--154245	22	2	22	83	12	56	56	2	38	2	1.24
mitogenome Contig 4	154702--154765	32	2	32	84	3	85	39	15	25	20	1.92
mitogenome Contig 4	162026--162064	11	3.5	11	100	0	78	30	33	17	17	1.94
mitogenome Contig 5	28707--28783	24	3.2	24	96	0	145	25	25	27	20	1.99
mitogenome Contig 5	62868--62901	17	2	17	94	0	59	23	20	5	50	1.7
mitogenome Contig 5	73039--73090	18	2.7	18	85	8	59	36	9	40	13	1.77
mitogenome Contig 6	10631--10680	21	2.4	21	79	0	55	34	18	24	24	1.96
chloroplast genome	395--434	17	2.4	16	91	4	62	67	17	2	12	1.33
chloroplast genome	4888--4956	35	2	35	83	11	88	60	1	1	36	1.14
chloroplast genome	5846--5872	13	2.1	13	100	0	54	37	0	7	55	1.28
chloroplast genome	6256--6303	24	2	24	92	4	80	54	4	6	35	1.45
chloroplast genome	6259--6309	23	2.2	24	85	3	68	56	5	7	29	1.51
chloroplast genome	7702--7734	2	16.5	2	87	12	50	48	0	3	48	1.17
chloroplast genome	9594--9619	13	2	13	100	0	52	30	7	0	61	1.24
chloroplast genome	10175--10199	11	2.3	11	100	0	50	8	8	8	76	1.18
chloroplast genome	10231--10286	16	3.3	16	80	20	69	46	5	0	48	1.25
chloroplast genome	10231--10282	20	2.8	19	86	13	74	46	5	0	48	1.26
chloroplast genome	10244--10283	20	2	20	100	0	80	50	5	0	45	1.23
chloroplast genome	14217--14248	10	3.1	10	95	4	55	40	9	9	40	1.7
chloroplast genome	14586--14614	11	2.5	12	88	11	51	31	0	6	62	1.22
chloroplast genome	31817--31851	14	2.5	14	95	0	61	22	14	0	62	1.31
chloroplast genome	36539--36576	19	2	19	100	0	76	36	15	15	31	1.9
chloroplast genome	37328--37359	16	2	16	100	0	64	50	6	0	43	1.27
chloroplast genome	37467--37675	42	4.9	40	77	19	160	40	0	1	57	1.11
chloroplast genome	37512--37585	25	3	25	94	2	123	47	0	2	50	1.15
chloroplast genome	37590--37668	6	11.8	6	80	19	86	35	0	0	64	0.94
chloroplast genome	37570--37668	14	7	14	83	16	125	36	0	1	62	1.02
chloroplast genome	37484--37668	34	5.6	34	70	21	135	40	0	1	57	1.08
chloroplast genome	37485--37716	14	14.9	15	77	14	124	43	0	2	54	1.12
chloroplast genome	37484--37676	40	4.5	42	75	20	179	40	0	1	57	1.08
chloroplast genome	37733--37793	26	2.5	23	73	14	59	68	0	11	19	1.19
chloroplast genome	37744--37784	13	3.2	13	100	0	82	70	0	7	21	1.11
chloroplast genome	37807--37837	11	2.8	11	95	0	53	45	0	3	51	1.17
chloroplast genome	45824--45852	14	2.1	14	100	0	58	62	0	0	37	0.96
chloroplast genome	46762--46787	12	2.2	12	100	0	52	34	0	7	57	1.27
chloroplast genome	48069--48099	15	2.1	15	100	0	62	38	12	0	48	1.42
chloroplast genome	48138--48184	16	3.1	15	78	12	51	59	4	19	17	1.53
chloroplast genome	48921--48953	17	1.9	17	100	0	66	30	6	6	57	1.47
chloroplast genome	50695--50738	22	2	22	100	0	88	40	9	9	40	1.68
chloroplast genome	53868--53910	15	2.9	15	96	3	79	58	6	0	34	1.25
chloroplast genome	57313--57373	13	4.6	12	76	23	52	18	9	0	72	1.11
chloroplast genome	59327--59361	12	2.9	12	100	0	70	8	31	0	60	1.27
chloroplast genome	60362--60418	27	2.1	27	96	0	105	38	12	21	28	1.89
chloroplast genome	67334--67370	16	2.2	18	85	9	51	64	2	13	18	1.39
chloroplast genome	67402--67437	17	2.1	17	100	0	72	77	0	5	16	0.94
chloroplast genome	68553--68580	14	2	14	100	0	56	50	7	21	21	1.72
chloroplast genome	71458--71483	13	2	13	100	0	52	15	30	0	53	1.42
chloroplast genome	74181--74208	14	2	14	100	0	56	28	14	0	57	1.38
chloroplast genome	76132--76165	16	2.1	16	100	0	68	11	17	5	64	1.45
chloroplast genome	78676--78712	10	3.6	10	92	7	65	48	2	0	48	1.15
chloroplast genome	83847--83874	13	2.2	13	100	0	56	21	14	0	64	1.29
chloroplast genome	86130--86199	21	3.3	21	90	4	79	18	11	0	70	1.17
chloroplast genome	86153--86199	21	2.2	21	100	0	94	21	8	0	70	1.14
chloroplast genome	86181--86211	14	2.2	14	100	0	62	32	6	0	61	1.21
chloroplast genome	86232--86280	15	3.4	15	72	16	50	12	4	2	81	0.91
chloroplast genome	91336--91418	21	3.7	23	75	18	77	13	22	9	54	1.68
chloroplast genome	91358--91425	21	3.2	21	82	0	82	11	22	7	58	1.57
chloroplast genome	93766--93807	18	2.3	18	88	8	59	30	7	26	35	1.83
chloroplast genome	101514--101544	12	2.5	12	94	5	53	6	12	0	80	0.89
chloroplast genome	112855--112894	15	2.9	13	86	13	62	42	15	0	42	1.46
chloroplast genome	112886--112931	7	7.3	7	81	18	57	52	0	0	47	1
chloroplast genome	112886--112929	12	3.5	13	82	17	58	52	0	0	47	1
chloroplast genome	112886--112931	18	2.5	19	96	3	85	52	0	0	47	1
chloroplast genome	112924--112958	17	1.9	19	88	11	56	57	0	0	42	0.99
chloroplast genome	112899--112989	26	3.6	25	81	15	100	57	0	1	41	1.06
chloroplast genome	119765--119796	15	2.1	15	100	0	64	6	6	6	81	0.99
chloroplast genome	123390--123423	16	2.1	16	100	0	68	50	0	11	38	1.39
chloroplast genome	123460--123510	20	2.5	19	81	15	57	13	3	9	72	1.24
chloroplast genome	131288--131326	18	2.2	18	100	0	78	15	10	15	58	1.62
chloroplast genome	142644--142674	12	2.5	12	94	5	53	80	0	12	6	0.89
chloroplast genome	150381--150422	18	2.3	18	88	8	59	35	26	7	30	1.83
chloroplast genome	152764--152852	21	4.1	21	81	5	81	56	8	22	12	1.64

## Sheet: TableS4
Table S4. SSRs in the organelle genome of E. chloranthoides.
Organelle genome	SSR nr.	SSR type	SSR	size	start	end
mitogenome Contig 1	1	p4	(AGAA)3	12	3953	3964
mitogenome Contig 1	2	p2	(TC)5	10	7976	7985
mitogenome Contig 1	3	p2	(AG)5	10	12593	12602
mitogenome Contig 1	4	p6	(TATAGA)3	18	13748	13765
mitogenome Contig 1	5	p4	(TCGG)3	12	14640	14651
mitogenome Contig 1	6	p1	(T)10	10	16225	16234
mitogenome Contig 1	7	p1	(T)13	13	17134	17146
mitogenome Contig 1	8	p3	(AAG)4	12	19287	19298
mitogenome Contig 1	9	p1	(A)11	11	21933	21943
mitogenome Contig 1	10	p1	(A)10	10	23675	23684
mitogenome Contig 1	11	p4	(GCAG)3	12	31178	31189
mitogenome Contig 1	12	p2	(AG)5	10	32586	32595
mitogenome Contig 1	13	p3	(AAG)4	12	32938	32949
mitogenome Contig 1	14	p1	(A)10	10	42729	42738
mitogenome Contig 1	15	p2	(CT)5	10	48063	48072
mitogenome Contig 1	16	p5	(AAAAG)3	15	49034	49048
mitogenome Contig 1	17	p2	(TA)5	10	55043	55052
mitogenome Contig 1	18	p1	(T)10	10	55918	55927
mitogenome Contig 1	19	p4	(AAGA)3	12	56581	56592
mitogenome Contig 1	20	p5	(CTAGT)3	15	58596	58610
mitogenome Contig 1	21	p1	(T)10	10	58613	58622
mitogenome Contig 1	22	p1	(A)11	11	64514	64524
mitogenome Contig 1	23	p4	(GAAT)3	12	66580	66591
mitogenome Contig 1	24	p4	(TTCT)3	12	76116	76127
mitogenome Contig 1	25	p2	(AG)5	10	77371	77380
mitogenome Contig 1	26	p4	(AGGA)4	16	89358	89373
mitogenome Contig 1	27	p4	(AAAG)3	12	93890	93901
mitogenome Contig 1	28	p1	(A)10	10	94693	94702
mitogenome Contig 1	29	p3	(AAG)4	12	94701	94712
mitogenome Contig 1	30	p1	(A)10	10	96133	96142
mitogenome Contig 1	31	p1	(T)12	12	96341	96352
mitogenome Contig 1	32	p2	(AT)5	10	96552	96561
mitogenome Contig 1	33	p4	(TAAG)3	12	97872	97883
mitogenome Contig 1	34	p3	(AGA)4	12	101378	101389
mitogenome Contig 1	35	p4	(AAAC)3	12	102473	102484
mitogenome Contig 1	36	p4	(CTTT)3	12	106831	106842
mitogenome Contig 1	37	p2	(CT)5	10	116329	116338
mitogenome Contig 1	38	p1	(A)10	10	121523	121532
mitogenome Contig 1	39	p2	(CT)5	10	130271	130280
mitogenome Contig 1	40	p2	(TC)5	10	134740	134749
mitogenome Contig 1	41	p3	(TCT)4	12	136720	136731
mitogenome Contig 1	42	p4	(CTTA)3	12	140272	140283
mitogenome Contig 1	43	p1	(A)12	12	141738	141749
mitogenome Contig 1	44	p1	(T)11	11	150190	150200
mitogenome Contig 1	45	p1	(T)19	19	150620	150638
mitogenome Contig 1	46	p1	(A)12	12	151743	151754
mitogenome Contig 1	47	p1	(A)13	13	152655	152667
mitogenome Contig 1	48	p1	(T)14	14	153773	153786
mitogenome Contig 1	49	p2	(AT)5	10	155257	155266
mitogenome Contig 1	50	p2	(AG)5	10	159457	159466
mitogenome Contig 1	51	p1	(T)10	10	162164	162173
mitogenome Contig 1	52	p3	(AGG)4	12	164317	164328
mitogenome Contig 1	53	p2	(AT)8	16	164735	164750
mitogenome Contig 1	54	p4	(TAGA)3	12	167309	167320
mitogenome Contig 1	55	p2	(AT)7	14	168917	168930
mitogenome Contig 1	56	p4	(GTGA)3	12	170329	170340
mitogenome Contig 1	57	p4	(GCCT)3	12	176233	176244
mitogenome Contig 1	58	p1	(T)11	11	177625	177635
mitogenome Contig 1	59	p1	(A)10	10	178672	178681
mitogenome Contig 1	60	p1	(A)10	10	181578	181587
mitogenome Contig 1	61	p1	(A)11	11	182732	182742
mitogenome Contig 1	62	p4	(AATG)3	12	184732	184743
mitogenome Contig 1	63	p2	(TA)5	10	185586	185595
mitogenome Contig 1	64	p2	(AT)6	12	185623	185634
mitogenome Contig 1	65	p1	(A)10	10	186014	186023
mitogenome Contig 1	66	p1	(T)10	10	186592	186601
mitogenome Contig 1	67	p5	(CTTGA)3	15	190179	190193
mitogenome Contig 1	68	p4	(CTTT)3	12	194484	194495
mitogenome Contig 1	69	p3	(TTC)4	12	198131	198142
mitogenome Contig 1	70	p3	(GAA)4	12	202972	202983
mitogenome Contig 1	71	p2	(TA)7	14	204507	204520
mitogenome Contig 1	72	p4	(AAGC)3	12	217639	217650
mitogenome Contig 1	73	p1	(T)10	10	218616	218625
mitogenome Contig 1	74	p4	(CTTT)3	12	220286	220297
mitogenome Contig 1	75	p4	(TTGA)3	12	220845	220856
mitogenome Contig 1	76	p4	(TCTT)3	12	236901	236912
mitogenome Contig 1	77	p2	(AT)5	10	238228	238237
mitogenome Contig 1	78	p4	(AATA)3	12	238287	238298
mitogenome Contig 1	79	p4	(CTTT)3	12	242596	242607
mitogenome Contig 1	80	p4	(CTTC)3	12	242939	242950
mitogenome Contig 1	81	p5	(CTTGA)3	15	248972	248986
mitogenome Contig 1	82	p4	(CTTT)3	12	253277	253288
mitogenome Contig 1	83	p4	(TTCT)3	12	262931	262942
mitogenome Contig 1	84	p4	(TCTT)3	12	273475	273486
mitogenome Contig 1	85	p2	(GA)5	10	275371	275380
mitogenome Contig 1	86	p2	(AG)5	10	275679	275688
mitogenome Contig 1	87	p4	(TAGT)3	12	281997	282008
mitogenome Contig 1	88	p1	(T)10	10	289506	289515
mitogenome Contig 1	89	p4	(CTAG)3	12	289930	289941
mitogenome Contig 1	90	p4	(AAGC)3	12	292187	292198
mitogenome Contig 1	91	p1	(T)10	10	292726	292735
mitogenome Contig 1	92	p4	(AAAT)3	12	304165	304176
mitogenome Contig 1	93	p5	(ATAAA)3	15	304222	304236
mitogenome Contig 1	94	p2	(GA)5	10	312268	312277
mitogenome Contig 1	95	p3	(AGA)4	12	313240	313251
mitogenome Contig 1	96	p2	(TC)5	10	314917	314926
mitogenome Contig 1	97	p5	(AAGGA)3	15	316716	316730
mitogenome Contig 1	98	p1	(T)10	10	326143	326152
mitogenome Contig 1	99	p1	(A)10	10	326254	326263
mitogenome Contig 1	100	p1	(T)11	11	327533	327543
mitogenome Contig 1	101	p1	(T)10	10	329111	329120
mitogenome Contig 1	102	p3	(GAA)4	12	329399	329410
mitogenome Contig 1	103	p4	(CGCC)3	12	330103	330114
mitogenome Contig 2	1	p4	(GGAC)3	12	11	22
mitogenome Contig 2	2	p1	(T)11	11	1382	1392
mitogenome Contig 2	3	p3	(ACC)4	12	3896	3907
mitogenome Contig 2	4	p5	(TTGCT)3	15	15264	15278
mitogenome Contig 2	5	p1	(T)10	10	21056	21065
mitogenome Contig 2	6	p1	(T)10	10	28113	28122
mitogenome Contig 2	7	p1	(T)11	11	31995	32005
mitogenome Contig 2	8	p4	(CTAT)3	12	41924	41935
mitogenome Contig 2	9	p2	(TC)5	10	45509	45518
mitogenome Contig 2	10	p3	(AAG)4	12	48414	48425
mitogenome Contig 2	11	p2	(TC)5	10	48736	48745
mitogenome Contig 2	12	p1	(A)12	12	50204	50215
mitogenome Contig 2	13	p3	(ATA)4	12	59478	59489
mitogenome Contig 2	14	p4	(GCCG)3	12	62961	62972
mitogenome Contig 2	15	p1	(T)13	13	63263	63275
mitogenome Contig 2	16	p4	(TAGA)3	12	63471	63482
mitogenome Contig 2	17	p1	(A)12	12	65063	65074
mitogenome Contig 2	18	p3	(TAG)4	12	66490	66501
mitogenome Contig 2	19	p2	(AT)5	10	72526	72535
mitogenome Contig 2	20	p4	(CAGA)3	12	73711	73722
mitogenome Contig 2	21	p6	(CAGAGA)3	18	74774	74791
mitogenome Contig 2	22	p1	(T)10	10	84811	84820
mitogenome Contig 2	23	p1	(T)12	12	97555	97566
mitogenome Contig 2	24	p5	(ATTAC)3	15	98447	98461
mitogenome Contig 2	25	p1	(T)11	11	99401	99411
mitogenome Contig 2	26	p2	(AG)5	10	104450	104459
mitogenome Contig 2	27	p4	(TAGG)3	12	108680	108691
mitogenome Contig 2	28	p4	(AGAA)3	12	114866	114877
mitogenome Contig 2	29	p1	(A)12	12	116414	116425
mitogenome Contig 2	30	p2	(CT)5	10	116682	116691
mitogenome Contig 2	31	p1	(A)10	10	119699	119708
mitogenome Contig 2	32	p1	(A)11	11	124343	124353
mitogenome Contig 2	33	p1	(T)10	10	125924	125933
mitogenome Contig 2	34	p4	(AAGA)3	12	129709	129720
mitogenome Contig 2	35	p1	(A)10	10	130134	130143
mitogenome Contig 2	36	p1	(T)10	10	131451	131460
mitogenome Contig 2	37	p5	(TTATA)3	15	132622	132636
mitogenome Contig 2	38	p1	(A)14	14	133736	133749
mitogenome Contig 2	39	p4	(AAAG)4	16	148079	148094
mitogenome Contig 2	40	p4	(ATTC)3	12	153422	153433
mitogenome Contig 2	41	p2	(GA)5	10	154246	154255
mitogenome Contig 2	42	p1	(A)12	12	154509	154520
mitogenome Contig 2	43	p4	(ATTC)4	16	159632	159647
mitogenome Contig 2	44	p1	(T)11	11	163013	163023
mitogenome Contig 2	45	p1	(T)10	10	164926	164935
mitogenome Contig 2	46	p2	(TA)5	10	166522	166531
mitogenome Contig 2	47	p4	(TCTT)3	12	169444	169455
mitogenome Contig 2	48	p2	(GA)5	10	172996	173005
mitogenome Contig 2	49	p1	(A)11	11	174725	174735
mitogenome Contig 2	50	p4	(TATC)3	12	175056	175067
mitogenome Contig 2	51	p4	(TTAT)3	12	176532	176543
mitogenome Contig 2	52	p4	(AGAA)3	12	180049	180060
mitogenome Contig 2	53	p4	(TCTA)6	24	183105	183128
mitogenome Contig 2	54	p4	(GTTG)3	12	183258	183269
mitogenome Contig 2	55	p2	(TC)5	10	190815	190824
mitogenome Contig 2	56	p1	(A)12	12	192706	192717
mitogenome Contig 2	57	p2	(GA)5	10	193035	193044
mitogenome Contig 2	58	p1	(A)11	11	194057	194067
mitogenome Contig 3	1	p1	(T)11	11	1839	1849
mitogenome Contig 3	2	p1	(T)10	10	1976	1985
mitogenome Contig 3	3	p1	(T)10	10	2488	2497
mitogenome Contig 3	4	p2	(CT)6	12	8484	8495
mitogenome Contig 3	5	p3	(TTA)4	12	14164	14175
mitogenome Contig 3	6	p2	(AG)7	14	15219	15232
mitogenome Contig 3	7	p5	(AGGAA)3	15	16273	16287
mitogenome Contig 3	8	p3	(TCT)4	12	21174	21185
mitogenome Contig 3	9	p1	(T)10	10	26607	26616
mitogenome Contig 3	10	p2	(AG)5	10	29929	29938
mitogenome Contig 3	11	p1	(T)15	15	36144	36158
mitogenome Contig 3	12	p5	(CAGAC)3	15	36687	36701
mitogenome Contig 3	13	p1	(A)10	10	37127	37136
mitogenome Contig 3	14	p2	(GA)5	10	41355	41364
mitogenome Contig 3	15	p3	(GGT)4	12	41906	41917
mitogenome Contig 3	16	p3	(CTT)4	12	47805	47816
mitogenome Contig 3	17	p4	(AGAA)3	12	51749	51760
mitogenome Contig 3	18	p2	(TC)6	12	54212	54223
mitogenome Contig 3	19	p1	(T)11	11	60750	60760
mitogenome Contig 3	20	p4	(TCCT)3	12	60939	60950
mitogenome Contig 3	21	p2	(TC)6	12	70216	70227
mitogenome Contig 3	22	p2	(TC)5	10	74629	74638
mitogenome Contig 3	23	p1	(A)11	11	75127	75137
mitogenome Contig 3	24	p4	(GAAA)3	12	75929	75940
mitogenome Contig 3	25	p4	(TTCT)3	12	76058	76069
mitogenome Contig 3	26	p4	(CAGT)3	12	77000	77011
mitogenome Contig 3	27	p1	(A)13	13	77310	77322
mitogenome Contig 3	28	p3	(TGT)4	12	81488	81499
mitogenome Contig 3	29	p4	(TCTT)3	12	85558	85569
mitogenome Contig 3	30	p1	(A)10	10	85574	85583
mitogenome Contig 3	31	p2	(GA)5	10	90749	90758
mitogenome Contig 3	32	p4	(AAGT)3	12	93508	93519
mitogenome Contig 3	33	p4	(AAGC)3	12	98367	98378
mitogenome Contig 3	34	p6	(TCCTAC)3	18	102966	102983
mitogenome Contig 3	35	p4	(AAGA)3	12	103960	103971
mitogenome Contig 3	36	p2	(AT)5	10	106871	106880
mitogenome Contig 3	37	p1	(A)10	10	107144	107153
mitogenome Contig 3	38	p4	(TCTT)3	12	107462	107473
mitogenome Contig 3	39	p1	(C)10	10	111613	111622
mitogenome Contig 3	40	p2	(TC)5	10	120828	120837
mitogenome Contig 3	41	p4	(GAAA)3	12	122107	122118
mitogenome Contig 3	42	p4	(TTCA)3	12	123185	123196
mitogenome Contig 3	43	p3	(AAG)4	12	126330	126341
mitogenome Contig 3	44	p4	(TATC)3	12	134616	134627
mitogenome Contig 3	45	p4	(TCTT)3	12	134778	134789
mitogenome Contig 3	46	p1	(C)10	10	135084	135093
mitogenome Contig 3	47	p1	(T)10	10	135123	135132
mitogenome Contig 3	48	p4	(TTAA)3	12	135764	135775
mitogenome Contig 3	49	p1	(A)10	10	135971	135980
mitogenome Contig 3	50	p5	(CTAGA)3	15	137816	137830
mitogenome Contig 3	51	p2	(AT)8	16	139367	139382
mitogenome Contig 3	52	p1	(A)10	10	145776	145785
mitogenome Contig 3	53	p1	(A)10	10	149479	149488
mitogenome Contig 3	54	p4	(TGAT)3	12	154032	154043
mitogenome Contig 3	55	p1	(T)13	13	155833	155845
mitogenome Contig 3	56	p1	(A)10	10	157827	157836
mitogenome Contig 3	57	p5	(ACTTA)3	15	159731	159745
mitogenome Contig 4	1	p1	(T)11	11	4186	4196
mitogenome Contig 4	2	p4	(TCTT)3	12	4374	4385
mitogenome Contig 4	3	p4	(TTTC)3	12	10249	10260
mitogenome Contig 4	4	p3	(GAA)4	12	10587	10598
mitogenome Contig 4	5	p4	(CAAG)3	12	10695	10706
mitogenome Contig 4	6	p4	(CTTA)3	12	15535	15546
mitogenome Contig 4	7	p3	(GAA)4	12	16832	16843
mitogenome Contig 4	8	p4	(TGCT)3	12	18561	18572
mitogenome Contig 4	9	p3	(CTT)4	12	22483	22494
mitogenome Contig 4	10	p1	(A)10	10	22603	22612
mitogenome Contig 4	11	p1	(T)11	11	24616	24626
mitogenome Contig 4	12	p2	(TA)5	10	30680	30689
mitogenome Contig 4	13	p2	(AG)5	10	44049	44058
mitogenome Contig 4	14	p4	(ATGG)3	12	49391	49402
mitogenome Contig 4	15	p6	(CTTATC)4	24	51533	51556
mitogenome Contig 4	16	p6	(CATTGG)4	24	51569	51592
mitogenome Contig 4	17	p4	(ATTT)3	12	56542	56553
mitogenome Contig 4	18	p2	(AT)6	12	57536	57547
mitogenome Contig 4	19	p1	(A)10	10	58243	58252
mitogenome Contig 4	20	p4	(CTTT)3	12	58683	58694
mitogenome Contig 4	21	p1	(T)13	13	58744	58756
mitogenome Contig 4	22	p3	(CTG)4	12	60234	60245
mitogenome Contig 4	23	p2	(TC)5	10	63013	63022
mitogenome Contig 4	24	p1	(T)10	10	64853	64862
mitogenome Contig 4	25	p1	(T)10	10	66965	66974
mitogenome Contig 4	26	p4	(AGTC)3	12	68865	68876
mitogenome Contig 4	27	p2	(CT)5	10	74820	74829
mitogenome Contig 4	28	p2	(TA)6	12	76596	76607
mitogenome Contig 4	29	p1	(T)10	10	80795	80804
mitogenome Contig 4	30	p3	(GAT)4	12	81401	81412
mitogenome Contig 4	31	p4	(TTAT)6	24	89614	89637
mitogenome Contig 4	32	p4	(AAAG)3	12	90285	90296
mitogenome Contig 4	33	p3	(AGA)4	12	109019	109030
mitogenome Contig 4	34	p4	(CTTG)3	12	113006	113017
mitogenome Contig 4	35	p1	(A)11	11	117361	117371
mitogenome Contig 4	36	p4	(ACTT)3	12	119887	119898
mitogenome Contig 4	37	p3	(TCT)4	12	119969	119980
mitogenome Contig 4	38	p1	(T)16	16	123225	123240
mitogenome Contig 4	39	p1	(A)10	10	127770	127779
mitogenome Contig 4	40	p1	(T)10	10	128395	128404
mitogenome Contig 4	41	p4	(AAGC)3	12	131764	131775
mitogenome Contig 4	42	p1	(T)11	11	132664	132674
mitogenome Contig 4	43	p4	(AGAC)3	12	132970	132981
mitogenome Contig 4	44	p4	(CTAA)3	12	140089	140100
mitogenome Contig 4	45	p2	(CT)5	10	141461	141470
mitogenome Contig 4	46	p3	(TAT)4	12	142132	142143
mitogenome Contig 4	47	p2	(AT)5	10	143145	143154
mitogenome Contig 4	48	p4	(TGCT)3	12	143427	143438
mitogenome Contig 4	49	p4	(CCCT)3	12	144298	144309
mitogenome Contig 4	50	p2	(TA)5	10	145504	145513
mitogenome Contig 4	51	p2	(AG)5	10	146643	146652
mitogenome Contig 4	52	p1	(T)10	10	147704	147713
mitogenome Contig 4	53	p4	(CTAG)3	12	149752	149763
mitogenome Contig 4	54	p4	(GATA)3	12	150438	150449
mitogenome Contig 4	55	p1	(T)10	10	151962	151971
mitogenome Contig 4	56	p2	(AG)5	10	154222	154231
mitogenome Contig 4	57	p3	(CTT)5	15	159591	159605
mitogenome Contig 4	58	p4	(GATA)3	12	160063	160074
mitogenome Contig 5	1	p1	(A)13	13	2529	2541
mitogenome Contig 5	2	p1	(A)10	10	2982	2991
mitogenome Contig 5	3	p1	(T)18	18	3752	3769
mitogenome Contig 5	4	p1	(T)11	11	4324	4334
mitogenome Contig 5	5	p2	(AT)7	14	4877	4890
mitogenome Contig 5	6	p2	(GA)6	12	8135	8146
mitogenome Contig 5	7	p1	(A)11	11	12242	12252
mitogenome Contig 5	8	p2	(GA)5	10	13303	13312
mitogenome Contig 5	9	p3	(GAA)4	12	15962	15973
mitogenome Contig 5	10	p2	(TC)5	10	21478	21487
mitogenome Contig 5	11	p4	(TCAT)3	12	22914	22925
mitogenome Contig 5	12	p3	(GAA)4	12	24857	24868
mitogenome Contig 5	13	p2	(TC)5	10	26237	26246
mitogenome Contig 5	14	p4	(TTCT)3	12	26975	26986
mitogenome Contig 5	15	p2	(AT)5	10	27756	27765
mitogenome Contig 5	16	p5	(CTCTT)3	15	28322	28336
mitogenome Contig 5	17	p1	(T)10	10	29682	29691
mitogenome Contig 5	18	p4	(AAAG)3	12	33254	33265
mitogenome Contig 5	19	p2	(CT)5	10	33411	33420
mitogenome Contig 5	20	p3	(AGA)4	12	33966	33977
mitogenome Contig 5	21	p1	(A)10	10	35255	35264
mitogenome Contig 5	22	p1	(A)10	10	39547	39556
mitogenome Contig 5	23	p3	(CAA)4	12	41419	41430
mitogenome Contig 5	24	p1	(G)11	11	41912	41922
mitogenome Contig 5	25	p4	(GATA)3	12	51910	51921
mitogenome Contig 5	26	p4	(AGAA)3	12	54845	54856
mitogenome Contig 5	27	p4	(ACCC)3	12	56010	56021
mitogenome Contig 5	28	p4	(GGAG)3	12	58469	58480
mitogenome Contig 5	29	p4	(TTCA)3	12	59724	59735
mitogenome Contig 5	30	p1	(T)10	10	60278	60287
mitogenome Contig 5	31	p4	(GAAA)3	12	61247	61258
mitogenome Contig 5	32	p5	(TCTAT)3	15	62135	62149
mitogenome Contig 5	33	p1	(A)13	13	62156	62168
mitogenome Contig 5	34	p2	(AT)6	12	64202	64213
mitogenome Contig 5	35	p3	(TTA)4	12	65230	65241
mitogenome Contig 5	36	p4	(TCAA)3	12	67288	67299
mitogenome Contig 5	37	p5	(GAAAT)3	15	71185	71199
mitogenome Contig 5	38	p6	(CGCATT)3	18	73523	73540
mitogenome Contig 5	39	p1	(A)10	10	95399	95408
mitogenome Contig 5	40	p1	(A)11	11	97032	97042
mitogenome Contig 6	1	p3	(CTT)4	12	298	309
mitogenome Contig 6	2	p4	(TCAT)3	12	7107	7118
mitogenome Contig 6	3	p1	(A)14	14	8453	8466
mitogenome Contig 6	4	p2	(TA)5	10	12865	12874
mitogenome Contig 6	5	p4	(ATAG)3	12	12971	12982
mitogenome Contig 6	6	p5	(TTGAA)3	15	14146	14160
chloroplast genome	1	p5	(TTTTA)3	15	300	314
chloroplast genome	2	p4	(AACA)3	12	406	417
chloroplast genome	3	p1	(T)13	13	1832	1844
chloroplast genome	4	p1	(T)16	16	6681	6696
chloroplast genome	5	p1	(A)11	11	6758	6768
chloroplast genome	6	p1	(A)11	11	7043	7053
chloroplast genome	7	p4	(CAAA)3	12	7436	7447
chloroplast genome	8	p1	(A)15	15	7445	7459
chloroplast genome	9	p1	(T)14	14	7600	7613
chloroplast genome	10	p2	(AT)9	18	7706	7723
chloroplast genome	11	p2	(AT)5	10	7725	7734
chloroplast genome	12	p4	(ATCT)3	12	8168	8179
chloroplast genome	13	p1	(T)11	11	8201	8211
chloroplast genome	14	p3	(TAA)4	12	8246	8257
chloroplast genome	15	p1	(A)15	15	8256	8270
chloroplast genome	16	p1	(T)17	17	8437	8453
chloroplast genome	17	p1	(T)10	10	10304	10313
chloroplast genome	18	p1	(A)14	14	12531	12544
chloroplast genome	19	p1	(T)13	13	12630	12642
chloroplast genome	20	p1	(T)18	18	13275	13292
chloroplast genome	21	p1	(A)21	21	13815	13835
chloroplast genome	22	p3	(TTA)4	12	14426	14437
chloroplast genome	23	p1	(T)10	10	14898	14907
chloroplast genome	24	p1	(A)12	12	16775	16786
chloroplast genome	25	p1	(T)12	12	18990	19001
chloroplast genome	26	p1	(A)16	16	23461	23476
chloroplast genome	27	p1	(T)10	10	26772	26781
chloroplast genome	28	p4	(TCAA)3	12	28837	28848
chloroplast genome	29	p2	(AT)7	14	29718	29731
chloroplast genome	30	p1	(A)10	10	30776	30785
chloroplast genome	31	p1	(T)14	14	30877	30890
chloroplast genome	32	p2	(AT)5	10	31078	31087
chloroplast genome	33	p1	(T)15	15	31205	31219
chloroplast genome	34	p1	(A)13	13	32480	32492
chloroplast genome	35	p1	(A)10	10	33123	33132
chloroplast genome	36	p1	(A)13	13	36249	36261
chloroplast genome	37	p2	(AT)5	10	36389	36398
chloroplast genome	38	p1	(A)15	15	36696	36710
chloroplast genome	39	p6	(TTATAT)3	18	37618	37635
chloroplast genome	40	p6	(TTATAT)3	18	37638	37655
chloroplast genome	41	p2	(TA)5	10	37825	37834
chloroplast genome	42	p1	(T)13	13	44877	44889
chloroplast genome	43	p1	(T)13	13	46285	46297
chloroplast genome	44	p1	(A)15	15	48826	48840
chloroplast genome	45	p2	(AT)5	10	49856	49865
chloroplast genome	46	p1	(T)17	17	51282	51298
chloroplast genome	47	p4	(TTTA)4	16	53568	53583
chloroplast genome	48	p1	(T)10	10	56803	56812
chloroplast genome	49	p1	(T)15	15	59432	59446
chloroplast genome	50	p1	(A)16	16	59467	59482
chloroplast genome	51	p6	(TTTTTC)3	18	61253	61270
chloroplast genome	52	p2	(TG)5	10	62808	62817
chloroplast genome	53	p2	(TC)5	10	63226	63235
chloroplast genome	54	p6	(TGGTTG)3	18	65673	65690
chloroplast genome	55	p4	(TTCT)3	12	65717	65728
chloroplast genome	56	p1	(T)11	11	67458	67468
chloroplast genome	57	p1	(A)10	10	68473	68482
chloroplast genome	58	p1	(T)15	15	68934	68948
chloroplast genome	59	p1	(A)16	16	69748	69763
chloroplast genome	60	p5	(TAAAA)3	15	71260	71274
chloroplast genome	61	p5	(TAATA)3	15	71747	71761
chloroplast genome	62	p1	(T)14	14	72255	72268
chloroplast genome	63	p1	(T)13	13	72319	72331
chloroplast genome	64	p1	(A)13	13	72652	72664
chloroplast genome	65	p1	(T)10	10	73390	73399
chloroplast genome	66	p1	(T)14	14	73947	73960
chloroplast genome	67	p1	(T)11	11	77046	77056
chloroplast genome	68	p1	(T)11	11	79877	79887
chloroplast genome	69	p1	(T)17	17	82557	82573
chloroplast genome	70	p1	(T)11	11	83059	83069
chloroplast genome	71	p1	(A)13	13	83127	83139
chloroplast genome	72	p4	(ATAA)3	12	83139	83150
chloroplast genome	73	p1	(T)11	11	84293	84303
chloroplast genome	74	p1	(T)17	17	84528	84544
chloroplast genome	75	p3	(ATT)4	12	84685	84696
chloroplast genome	76	p1	(T)11	11	84718	84728
chloroplast genome	77	p1	(T)12	12	86132	86143
chloroplast genome	78	p1	(T)14	14	86242	86255
chloroplast genome	79	p5	(TCCGG)3	15	97048	97062
chloroplast genome	80	p4	(TTTA)3	12	101474	101485
chloroplast genome	81	p1	(T)12	12	105550	105561
chloroplast genome	82	p1	(A)14	14	110597	110610
chloroplast genome	83	p1	(A)11	11	111867	111877
chloroplast genome	84	p1	(T)11	11	113766	113776
chloroplast genome	85	p1	(T)10	10	115239	115248
chloroplast genome	86	p3	(ATT)4	12	115351	115362
chloroplast genome	87	p5	(ATTTT)3	15	115882	115896
chloroplast genome	88	p1	(A)17	17	116694	116710
chloroplast genome	89	p1	(A)14	14	118019	118032
chloroplast genome	90	p1	(T)14	14	118176	118189
chloroplast genome	91	p1	(A)17	17	120740	120756
chloroplast genome	92	p1	(T)10	10	123501	123510
chloroplast genome	93	p1	(T)16	16	123918	123933
chloroplast genome	94	p3	(TAA)4	12	125970	125981
chloroplast genome	95	p2	(AT)8	16	126356	126371
chloroplast genome	96	p1	(T)17	17	126849	126865
chloroplast genome	97	p1	(T)10	10	128337	128346
chloroplast genome	98	p1	(T)11	11	128959	128969
chloroplast genome	99	p1	(T)15	15	129098	129112
chloroplast genome	100	p1	(A)12	12	129326	129337
chloroplast genome	101	p1	(T)11	11	129403	129413
chloroplast genome	102	p1	(A)10	10	131101	131110
chloroplast genome	103	p1	(T)11	11	131283	131293
chloroplast genome	104	p1	(T)11	11	132311	132321
chloroplast genome	105	p1	(T)14	14	133578	133591
chloroplast genome	106	p1	(A)12	12	138627	138638
chloroplast genome	107	p4	(TAAA)3	12	142703	142714
chloroplast genome	108	p5	(CCGGA)3	15	147126	147140
chloroplast genome	109	p1	(A)14	14	157933	157946

## Sheet: TableS5
Table S5. Relative synonymous codon usage (RSCU) in the organelle genome of E. chloranthoides.
mitogenome	Ala	GCU	GCA	GCC	GCG
		1.59	1.02	0.92	0.46
	Arg	AGA	CGA	CGU	AGG	CGG	CGC
		1.38	1.3	1.22	0.77	0.76	0.57
	Asn	AAU	AAC
		1.36	0.64
	Asp	GAU	GAC
		1.37	0.63
	Cys	UGU	UGC
		1.24	0.76
	End	UAA	UGA	UAG
		1.32	1.24	0.44
	Gln	CAA	CAG
		1.54	0.46
	Glu	GAA	GAG
		1.38	0.62
	Gly	GGA	GGU	GGG	GGC
		1.44	1.28	0.73	0.54
	His	CAU	CAC
		1.51	0.49
	Ile	AUU	AUC	AUA
		1.32	0.84	0.84
	Leu	UUA	CUU	UUG	CUA	CUC	CUG
		1.46	1.29	1.15	0.96	0.63	0.51
	Lys	AAA	AAG
		1.17	0.83
	Met	AUG
		1
	Phe	UUU	UUC
		1.14	0.86
	Pro	CCU	CCA	CCC	CCG
		1.47	1.05	0.75	0.73
	Ser	UCU	UCA	AGU	UCC	UCG	AGC
		1.36	1.18	1.07	0.92	0.84	0.63
	Thr	ACU	ACA	ACC	ACG
		1.37	1.03	1	0.6
	Trp	UGG
		1
	Tyr	UAU	UAC
		1.52	0.48
	Val	GUU	GUA	GUG	GUC
		1.17	1.12	0.9	0.8
chloroplast genome	Ala	GCU	GCA	GCC	GCG
		1.79	1.05	0.66	0.5
	Arg	AGA	CGA	CGU	AGG	CGC	CGG
		1.78	1.35	1.33	0.66	0.45	0.43
	Asn	AAU	AAC
		1.54	0.46
	Asp	GAU	GAC
		1.58	0.42
	Cys	UGU	UGC
		1.44	0.56
	End	UAA	UAG	UGA
		1.52	0.78	0.7
	Gln	CAA	CAG
		1.54	0.46
	Glu	GAA	GAG
		1.5	0.5
	Gly	GGA	GGU	GGG	GGC
		1.58	1.29	0.66	0.47
	His	CAU	CAC
		1.51	0.49
	Ile	AUU	AUA	AUC
		1.46	0.94	0.6
	Leu	UUA	CUU	UUG	CUA	CUC	CUG
		1.88	1.28	1.22	0.81	0.4	0.4
	Lys	AAA	AAG
		1.5	0.5
	Met	AUG
		1
	Phe	UUU	UUC
		1.34	0.66
	Pro	CCU	CCA	CCC	CCG
		1.53	1.14	0.76	0.57
	Ser	UCU	AGU	UCA	UCC	UCG	AGC
		1.72	1.28	1.15	0.96	0.52	0.37
	Thr	ACU	ACA	ACC	ACG
		1.68	1.16	0.73	0.43
	Trp	UGG
		1
	Tyr	UAU	UAC
		1.6	0.4
	Val	GUU	GUA	GUG	GUC
		1.49	1.42	0.59	0.5

## Sheet: TableS6
Table S6. The chi-square testing of RSCU of organelle encoded PCGs in E. chloranthoides.
Organelle genome	Amino_Acid	Num_Codons	Degrees_of_Freedom	Chi2_Statistic	P_Value	Status
chloroplast genome	Met	1	0	NaN	NaN	N/A (insufficient data)
chloroplast genome	Pro	4	3	124.323	0	Extremely significant
chloroplast genome	Thr	4	3	254.589	0	Extremely significant
chloroplast genome	Leu	6	5	668.89	0	Extremely significant
chloroplast genome	Lys	2	1	308.501	0	Extremely significant
chloroplast genome	Gln	2	1	231.704	0	Extremely significant
chloroplast genome	Ile	3	2	242.39	0	Extremely significant
chloroplast genome	Arg	6	5	356.273	0	Extremely significant
chloroplast genome	Asn	2	1	294.261	0	Extremely significant
chloroplast genome	Val	4	3	259.656	0	Extremely significant
chloroplast genome	Ser	6	5	343.898	0	Extremely significant
chloroplast genome	Ala	4	3	316.024	0	Extremely significant
chloroplast genome	Gly	4	3	317.479	0	Extremely significant
chloroplast genome	Cys	2	1	49	0	Extremely significant
chloroplast genome	Tyr	2	1	293.892	0	Extremely significant
chloroplast genome	Phe	2	1	145.362	0	Extremely significant
chloroplast genome	Glu	2	1	301.003	0	Extremely significant
chloroplast genome	His	2	1	142.545	0	Extremely significant
chloroplast genome	Asp	2	1	290.792	0	Extremely significant
chloroplast genome	End	3	2	10.963	0.004163	Statistically Significant
chloroplast genome	Trp	1	0	NaN	NaN	N/A (insufficient data)
mitogenome	Met	1	0	NaN	NaN	N/A (insufficient data)
mitogenome	Lys	2	1	12.1945	0.000479	Extremely significant
mitogenome	Glu	2	1	63.0681	0	Extremely significant
mitogenome	Ala	4	3	72.0979	0	Extremely significant
mitogenome	Ile	3	2	25.3343	3e-06	Extremely significant
mitogenome	Arg	6	5	60.231	0	Extremely significant
mitogenome	Val	4	3	14.7286	0.002064	Statistically Significant
mitogenome	Leu	6	5	105.094	0	Extremely significant
mitogenome	Ser	6	5	34.9631	2e-06	Extremely significant
mitogenome	Tyr	2	1	58.5984	0	Extremely significant
mitogenome	Asp	2	1	32	0	Extremely significant
mitogenome	Pro	4	3	44.0602	0	Extremely significant
mitogenome	Phe	2	1	9.50694	0.002047	Statistically Significant
mitogenome	Thr	4	3	30.2909	1e-06	Extremely significant
mitogenome	His	2	1	60	0	Extremely significant
mitogenome	Gly	4	3	84.2208	0	Extremely significant
mitogenome	Cys	2	1	7.44961	0.006345	Statistically Significant
mitogenome	Trp	1	0	NaN	NaN	N/A (insufficient data)
mitogenome	Gln	2	1	67.83	0	Extremely significant
mitogenome	Asn	2	1	28.7234	0	Extremely significant
mitogenome	End	3	2	4.32258	0.115176	Not Significant

## Sheet: TableS7
Table S7. RNA editing sites predicted in the mitochondrial genome of E. chloranthoides.
gene	Base position	Amino position	Codon change	Amino change	Left motifs	Edited site	Right motifs	Probability
atp1	1039	347	CCC->UCC	Pro->Ser	ATATTCCCACCAATGTGATC	C	CCATTACTGATGGACAAATC	1
atp1	1178	393	UCA->UUA	Ser->Leu	GAAACAAGTCTGCGGTAGTT	C	AAAACTAGAATTGGCACAAT	1
atp1	1292	431	CCG->CUG	Pro->Leu	TGCAAGGCTGACAGAAGTAC	C	GAAACAACCACAATATGCAC	1
atp1	1415	472	CCA->CUA	Pro->Leu	GCAATATGAGAGAGCCATTC	C	AAGTAGTGTCAAACCAGAAT	0.945
atp1	1490	497	CCA->CUA	Pro->Leu	TAACGAAAGAAAAATAGAAC	C	AGATGCATTCTTAAAAGAAA	0.999
atp4	23	8	UCU->UUU	Ser->Phe	GTTATTTGCTGCTATTTTAT	C	TATTTGTGCATTAAGTTCGA	0.965
atp4	53	18	UCA->UUA	Ser->Leu	ATTAAGTTCGAAGAAAATCT	C	AATCTATAATGAAGAAATGA	1
atp4	82	28	CGU->UGU	Arg->Cys	ATGAAGAAATGATAGTAGCT	C	GTTGTTTTATAGGCTTTCTC	0.984
atp4	179	60	UCG->UUG	Ser->Leu	CCAGGCTATTCAGGAAGAAT	C	GCAGCAATTCCCCAATCCTA	0.998
atp4	191	64	CCC->CUC	Pro->Leu	GGAAGAATCGCAGCAATTCC	C	CAATCCTAACGAAGTAGTTC	0.999
atp4	212	71	CCU->CUU	Pro->Leu	CAATCCTAACGAAGTAGTTC	C	TCCGGAATCCAATGAACAAC	1
atp4	214	72	CCG->UUG	Pro->Leu	ATCCTAACGAAGTAGTTCCT	C	CGGAATCCAATGAACAACAA	0.903
atp4	215	72	CCG->UUG	Pro->Leu	TCCTAACGAAGTAGTTCCTC	C	GGAATCCAATGAACAACAAC	1
atp4	380	127	ACU->AUU	Thr->Ile	AGCAACACTTCAAAATGCCA	C	TTCTTCCCGTCGCATCCGTC	0.992
atp6	167	56	CCG->CUG	Pro->Leu	GCTTATTTATGATTTCGTGC	C	GAACCCGGTAAACGAACAAA	0.999
atp6	173	58	CCG->CUG	Pro->Leu	TTATGATTTCGTGCCGAACC	C	GGTAAACGAACAAATAGGAG	0.983
atp6	229	77	CGC->UGC	Arg->Cys	TGAAACAAAAGTTTTTCCCT	C	GCATCTCGGTCACTTTTACT	0.998
atp6	236	79	UCG->UUG	Ser->Leu	AAAGTTTTTCCCTCGCATCT	C	GGTCACTTTTACTTTTTCGT	0.99
atp6	254	85	UCG->UUG	Ser->Leu	CTCGGTCACTTTTACTTTTT	C	GTTATTTCGTAATCCCCAGG	0.998
atp6	262	88	CGU->UGU	Arg->Cys	CTTTTACTTTTTCGTTATTT	C	GTAATCCCCAGGGTATGATA	0.999
atp6	269	90	CCC->CUU	Pro->Leu	TTTTTCGTTATTTCGTAATC	C	CCAGGGTATGATACCTTATA	0.997
atp6	270	90	CCC->CUU	Pro->Leu	TTTTCGTTATTTCGTAATCC	C	CAGGGTATGATACCTTATAG	0.968
atp6	401	134	UCC->UUC	Ser->Phe	GCTTCATTTTTTAAGCTTTT	C	CTTACCCGCAGGAGTCCCAC	0.999
atp6	460	154	CCU->UCU	Pro->Ser	TAGTACTCCTGGAGCTAATC	C	CTCATTGTTTTCGTGCATTA	0.997
atp6	463	155	CAU->UAU	His->Tyr	TACTCCTGGAGCTAATCCCT	C	ATTGTTTTCGTGCATTAAGC	1
atp6	485	162	UCA->UUA	Ser->Leu	TTGTTTTCGTGCATTAAGCT	C	AGGAATACGTTTATTTGCTA	1
atp6	527	176	UCA->UUA	Ser->Leu	TATGATGGCCGGTCATAGTT	C	AGTAAAGATTTTAAGTGGGT	1
atp6	548	183	UCC->UUC	Ser->Phe	AGTAAAGATTTTAAGTGGGT	C	CGCTTGGACTATGCTATGTA	1
atp6	599	200	CCU->CUU	Pro->Leu	TTTCTATTTCATAGGGGATC	C	TGGTCCTTTATTTATAGTTC	0.997
atp6	664	222	CAU->UAU	His->Tyr	GTGTAGCTATATTACAAGCT	C	ATGTTTCTACGATCTTAATC	0.998
atp6	671	224	UCU->UUU	Ser->Phe	TATATTACAAGCTCATGTTT	C	TACGATCTTAATCTGTATTT	0.998
atp6	707	236	ACA->AUA	Thr->Ile	TATTTACTTGAATGATGCTA	C	AAATCTCCATCAAAGTGGTT	1
atp6	718	240	CAA->UAA	Gln->End	ATGATGCTACAAATCTCCAT	C	AAAGTGGTTCTTTTTTTATA	0.929
atp8	30	10	UUC->UUU	Phe->Phe	CTGGATAAATTTACTTATTT	C	ACACAATTCTTCTGGTCATG	0.965
atp8	47	16	UCA->UUA	Ser->Leu	TTTCACACAATTCTTCTGGT	C	ATGCCTTTTCCTCTTTACTT	0.996
atp8	58	20	CUC->UUC	Leu->Phe	TCTTCTGGTCATGCCTTTTC	C	TCTTTACTTTCTATATTCTA	0.996
atp8	76	26	CUA->UUA	Leu->Leu	TCCTCTTTACTTTCTATATT	C	TAATATGCAATGATAGAGAT	0.93
atp8	222	74	UUC->UUU	Phe->Phe	GATATCTTGCGAAAAGGTTT	C	AGCACCGGTGTATCCTATAT	0.999
atp9	20	7	UCA->UUA	Ser->Leu	TATGTTAGAAGGTGCAAAAT	C	AATAGGTGCCGGAGCTGCAA	1
atp9	96	32	AUC->AUU	Ile->Ile	AACGTCTTCAGTTCTTTAAT	C	CATTCCGTGGCGCGAAATCC	0.994
atp9	205	69	CUG->UUG	Leu->Leu	TTGCCCTAATGATGGCCTTT	C	TGATCTCATTCGTATTCTGA	0.997
atp9	212	71	UCA->UUA	Ser->Leu	AATGATGGCCTTTCTGATCT	C	ATTCGTATTCTGATCTCTTA	0.999
ccmB	28	10	CAU->UAU	His->Tyr	GACTCTTTCTTGAACTATAT	C	ATAAACAGATCTTCCCCTCC	0.988
ccmB	43	15	CCC->UCC	Pro->Ser	TATATCATAAACAGATCTTC	C	CCTCCACACCAATCACGAGT	0.995
ccmB	71	24	CCA->CUA	Pro->Leu	ACCAATCACGAGTTTTTCTC	C	ATTCCTCTCGTATATCGTCG	0.992
ccmB	80	27	UCG->UUG	Ser->Leu	GAGTTTTTCTCCATTCCTCT	C	GTATATCGTCGTAACGCCCT	0.969
ccmB	87	29	AUC->AUU	Ile->Ile	TCTCCATTCCTCTCGTATAT	C	GTCGTAACGCCCTTAATGCT	0.963
ccmB	128	43	UCA->UUA	Ser->Leu	AGGTTTTGAAAAAGACTTTT	C	ATGTCATTCCCATTTAGGTC	0.998
ccmB	137	46	UCC->UUC	Ser->Phe	AAAAGACTTTTCATGTCATT	C	CCATTTAGGTCCGATTCGGA	0.988
ccmB	148	50	CCG->UUG	Pro->Leu	CATGTCATTCCCATTTAGGT	C	CGATTCGGATCCCTCCGTTG	0.989
ccmB	149	50	CCG->UUG	Pro->Leu	ATGTCATTCCCATTTAGGTC	C	GATTCGGATCCCTCCGTTGT	0.996
ccmB	154	52	CGG->UGG	Arg->Trp	ATTCCCATTTAGGTCCGATT	C	GGATCCCTCCGTTGTTTTCT	0.975
ccmB	160	54	CCU->UCU	Pro->Ser	ATTTAGGTCCGATTCGGATC	C	CTCCGTTGTTTTCTTTTCCT	0.993
ccmB	164	55	CCG->CUG	Pro->Leu	AGGTCCGATTCGGATCCCTC	C	GTTGTTTTCTTTTCCTCCTG	0.993
ccmB	179	60	CCU->CUU	Pro->Leu	CCCTCCGTTGTTTTCTTTTC	C	TCCTGCACCTTTTCCTCGAA	0.925
ccmB	181	61	CCU->UCU	Pro->Ser	CTCCGTTGTTTTCTTTTCCT	C	CTGCACCTTTTCCTCGAAAT	0.927
ccmB	193	65	CCU->UUU	Pro->Phe	CTTTTCCTCCTGCACCTTTT	C	CTCGAAATGAGAAAGAAGAT	0.944
ccmB	194	65	CCU->UUU	Pro->Phe	TTTTCCTCCTGCACCTTTTC	C	TCGAAATGAGAAAGAAGATG	0.994
ccmB	286	96	CGG->UGG	Arg->Trp	TTCTACAATTGGTAGGTCAC	C	GGGTTATTCAAATAAGTTGT	0.999
ccmB	338	113	CCG->CUG	Pro->Leu	TTTTCCCATGTTACAACTTC	C	GTACAAATTCGGTCGATCCG	0.997
ccmB	367	123	CGG->UGG	Arg->Trp	TCGGTCGATCCGGAATGGAT	C	GGTTAAACATTCCATTAGGG	0.979
ccmB	379	127	CCA->UUA	Pro->Leu	GAATGGATCGGTTAAACATT	C	CATTAGGGAGCCTGGTCTTG	0.919
ccmB	380	127	CCA->UUA	Pro->Leu	AATGGATCGGTTAAACATTC	C	ATTAGGGAGCCTGGTCTTGA	0.999
ccmB	424	142	CGU->UGU	Arg->Cys	TTATGTGTGGTATTCATTCT	C	GTTCGGCTCTTGGAATCACA	0.992
ccmB	428	143	UCG->UUG	Ser->Leu	GTGTGGTATTCATTCTCGTT	C	GGCTCTTGGAATCACATCCA	0.996
ccmB	467	156	UCG->UUG	Ser->Leu	CAGCAGTGGTTGGAACAGCT	C	GCAAAATCCAACCACTTCAC	0.975
ccmB	475	159	CCA->UUA	Pro->Leu	GTTGGAACAGCTCGCAAAAT	C	CAACCACTTCACCTACTTTA	0.998
ccmB	476	159	CCA->UUA	Pro->Leu	TTGGAACAGCTCGCAAAATC	C	AACCACTTCACCTACTTTAT	0.998
ccmB	485	162	UCA->UUA	Ser->Leu	CTCGCAAAATCCAACCACTT	C	ACCTACTTTATTGCCCCCAA	0.993
ccmB	503	168	CCA->CUA	Pro->Leu	TTCACCTACTTTATTGCCCC	C	AACCTTTTCTCGTACCTCTA	0.995
ccmB	512	171	UCU->UUU	Ser->Phe	TTTATTGCCCCCAACCTTTT	C	TCGTACCTCTATTGAAACAG	0.99
ccmB	514	172	CGU->UGU	Arg->Cys	TATTGCCCCCAACCTTTTCT	C	GTACCTCTATTGAAACAGAA	0.991
ccmB	551	184	UCA->UUA	Ser->Leu	AGAATGGTTTCATGTTCTTT	C	ATCGATTGGTTATTCCTCTC	0.997
ccmB	554	185	UCG->UUG	Ser->Leu	ATGGTTTCATGTTCTTTCAT	C	GATTGGTTATTCCTCTCCGT	0.994
ccmB	566	189	UCC->UUC	Ser->Phe	TCTTTCATCGATTGGTTATT	C	CTCTCCGTTCGTATGTCTTT	0.966
ccmB	569	190	UCU->UUU	Ser->Phe	TTCATCGATTGGTTATTCCT	C	TCCGTTCGTATGTCTTTTTC	0.958
ccmB	572	191	CCG->CUG	Pro->Leu	ATCGATTGGTTATTCCTCTC	C	GTTCGTATGTCTTTTTCCAA	0.999
ccmB	596	199	UCG->UUG	Ser->Leu	CGTATGTCTTTTTCCAATTT	C	GGTCCCGATTAGTTTCCAAG	0.972
ccmB	601	201	CCG->UCG	Pro->Ser	GTCTTTTTCCAATTTCGGTC	C	CGATTAGTTTCCAAGATTGA	0.985
ccmC	5	2	UCC->UUC	Ser->Phe	AGGACCAAATTCTCACATGT	C	CGTTTCGTTATTACAACCTT	0.997
ccmC	76	26	CGG->UGG	Arg->Trp	CGCAAATTCTCATTGGATCT	C	GGTTGTTCTTAACAGCGATG	1
ccmC	103	35	CAU->UAU	His->Tyr	TCTTAACAGCGATGGCTATT	C	ATTTAAGTCTTCGGGTAGCA	0.999
ccmC	115	39	CGG->UGG	Arg->Trp	TGGCTATTCATTTAAGTCTT	C	GGGTAGCACCACTAGATCTT	0.991
ccmC	133	45	CUU->UUU	Leu->Phe	TTCGGGTAGCACCACTAGAT	C	TTCAACAAGGTGGAAATTCT	0.987
ccmC	179	60	GCG->GUG	Ala->Val	TTTGTATGTACATGTTCCTG	C	GGCTCGGATGAGTATTCTTG	1
ccmC	184	62	CGG->UGG	Arg->Trp	ATGTACATGTTCCTGCGGCT	C	GGATGAGTATTCTTGTTTAT	0.994
ccmC	281	94	ACA->AUA	Thr->Ile	TCGCTCTTCCGGAACCGGTA	C	AGAAATTGGTGTTTTTTTTA	0.935
ccmC	331	111	CGG->UGG	Arg->Trp	CCTTAGTTACTGGGGGGTTT	C	GGGGAAGACCTATGTGGGGC	0.999
ccmC	395	132	UCG->UUG	Ser->Leu	TTTAACCTCTGTATTCATCT	C	GTTCCTTATTTACCTGGGTG	0.996
ccmC	399	133	UUC->UUU	Phe->Phe	ACCTCTGTATTCATCTCGTT	C	CTTATTTACCTGGGTGCACT	0.994
ccmC	400	134	CUU->UUU	Leu->Phe	CCTCTGTATTCATCTCGTTC	C	TTATTTACCTGGGTGCACTG	0.999
ccmC	421	141	CGU->UGU	Arg->Cys	TTATTTACCTGGGTGCACTG	C	GTTTTCAAAAGCTTCCTGTC	0.999
ccmC	436	146	CCU->UCU	Pro->Ser	CACTGCGTTTTCAAAAGCTT	C	CTGTCGAACCGGCTTCTATT	0.999
ccmC	446	149	CCG->CUG	Pro->Leu	TCAAAAGCTTCCTGTCGAAC	C	GGCTTCTATTTCAATCCGTG	0.996
ccmC	458	153	UCA->UUA	Ser->Leu	TGTCGAACCGGCTTCTATTT	C	AATCCGTGCTGGACCGATCG	0.979
ccmC	463	155	CGU->UGU	Arg->Cys	AACCGGCTTCTATTTCAATC	C	GTGCTGGACCGATCGATATA	0.999
ccmC	467	156	GCU->GUU	Ala->Val	GGCTTCTATTTCAATCCGTG	C	TGGACCGATCGATATACCAA	0.997
ccmC	473	158	CCG->CUG	Pro->Leu	TATTTCAATCCGTGCTGGAC	C	GATCGATATACCAATAATCA	0.995
ccmC	497	166	UCU->UUU	Ser->Phe	CGATATACCAATAATCAAGT	C	TTCAGTCAACTGGTGGAATA	0.999
ccmC	521	174	UCG->UUG	Ser->Leu	AGTCAACTGGTGGAATACAT	C	GCATCAACCTGGGAGCATTA	0.999
ccmC	548	183	UCU->UUU	Ser->Phe	ACCTGGGAGCATTAGCCGAT	C	TGGTACATCAATACATGTTC	0.994
ccmC	568	190	CCU->UCU	Pro->Ser	CTGGTACATCAATACATGTT	C	CTATGCCCATTCCAATCTTG	0.999
ccmC	575	192	CCC->CUC	Pro->Leu	ATCAATACATGTTCCTATGC	C	CATTCCAATCTTGTCTAACT	0.998
ccmC	605	202	UCC->UUC	Ser->Phe	CTTGTCTAACTTTGCTAACT	C	CCCCTTCTCAACCCGTATCT	1
ccmC	608	203	CCC->CUC	Pro->Leu	GTCTAACTTTGCTAACTCCC	C	CTTCTCAACCCGTATCTTCT	0.998
ccmC	614	205	UCA->UUA	Ser->Leu	CTTTGCTAACTCCCCCTTCT	C	AACCCGTATCTTCTTTGTTC	0.99
ccmC	650	217	CCU->CUU	Pro->Leu	TGTTCTGGAAACACGTCTTC	C	TATTCCATCTTTTCTCGAAT	0.997
ccmC	656	219	CCA->CUA	Pro->Leu	GGAAACACGTCTTCCTATTC	C	ATCTTTTCTCGAATCTCCTT	0.995
ccmC	673	225	CCU->UCU	Pro->Ser	TTCCATCTTTTCTCGAATCT	C	CTTTAACGGAAGAAATAGAA	0.998
ccmFC	38	13	UCC->UUC	Ser->Phe	CTTTTTATTTTTCATTACTT	C	CATGGTCGTGCCTCGTGGCA	0.994
ccmFC	50	17	CCU->CUU	Pro->Leu	CATTACTTCCATGGTCGTGC	C	TCGTGGCACGGCAGCACCCG	1
ccmFC	52	18	CGU->UGU	Arg->Cys	TTACTTCCATGGTCGTGCCT	C	GTGGCACGGCAGCACCCGTA	0.984
ccmFC	103	35	CCC->UCC	Pro->Ser	GGTTCGTCAGTAGAGATGTT	C	CCATAGGTGCCCCTTCTTCC	0.998
ccmFC	122	41	UCC->UUC	Ser->Phe	TCCCATAGGTGCCCCTTCTT	C	CAATGGTACTATAATTCCAA	0.988
ccmFC	155	52	UCA->UUA	Ser->Leu	AATTCCAATTCCTATCTCTT	C	ATTCCCTCTTTTGGTCTATC	0.956
ccmFC	303	101	GCC->GCU	Ala->Ala	GAAACTAGAGCTAGAAACGC	C	TCATTTCGTTTCGTTCCCGT	0.91
ccmFC	305	102	UCA->UUA	Ser->Leu	AACTAGAGCTAGAAACGCCT	C	ATTTCGTTTCGTTCCCGTTC	1
ccmFC	310	104	CGU->UGU	Arg->Cys	GAGCTAGAAACGCCTCATTT	C	GTTTCGTTCCCGTTCTTCAT	0.99
ccmFC	334	112	CUU->UUU	Leu->Phe	TCGTTCCCGTTCTTCATTTC	C	TTCTTCTCGAATCCAAGGGG	0.938
ccmFC	391	131	CGU->UGU	Arg->Cys	AATCTTTATGCGGTGTGCTC	C	GTTTACTATTCTTTCGTACT	0.984
ccmFC	406	136	CGU->UGU	Arg->Cys	TGCTCCGTTTACTATTCTTT	C	GTACTTTCTTCTCTTTATCA	0.998
ccmFC	875	292	UCU->UUU	Ser->Phe	TCATTTTCATGGACCCACTT	C	TCATTCCATTTGTGGTAATT	0.994
ccmFC	1160	387	UCG->UUG	Ser->Leu	ATTTACGGATCTATATGCTT	C	GATTGGAACTGGAAGTTCCA	0.999
ccmFC	1234	412	CGG->UGG	Arg->Trp	TGCCTTTTCTTTTTTTTATT	C	GGATAGGATTTATGTTAGCT	0.973
ccmFC	1259	420	UCG->UUG	Ser->Leu	AGGATTTATGTTAGCTTCGT	C	GGGAGGCTCGCGTAGTTTGT	0.988
ccmFC	1268	423	UCG->UUG	Ser->Leu	GTTAGCTTCGTCGGGAGGCT	C	GCGTAGTTTGTTACGTCAGC	0.962
ccmFC	1315	439	CGA->UGA	Arg->End	AGGAGAAGTTGCGTTGGAAT	C	GAGAAAGTTCCGTGGAGTTC	0.998
ccmFN	38	13	CCG->CUG	Pro->Leu	GTTTCATTATTCGTTATTTC	C	GGGTCTTTTCGTTGCATTCA	0.99
ccmFN	98	33	CCU->CUU	Pro->Leu	ACCAGCGTTTGGTGCAGCAC	C	TTCATTTTGGTGCATTCTTC	0.976
ccmFN	137	46	UCG->UUG	Ser->Leu	TCTTTCTTTCCTTGGTCTTT	C	GTTCCGTCATATTTCTAATA	0.988
ccmFN	142	48	CGU->UGU	Arg->Cys	CTTTCCTTGGTCTTTCGTTC	C	GTCATATTTCTAATAACTTA	0.989
ccmFN	248	83	UCA->UUA	Ser->Leu	TCATGAGGGTAGTATTTTAT	C	ATGGTGTCGGATCCCAAGTT	0.999
ccmFN	256	86	CGG->UGG	Arg->Trp	GTAGTATTTTATCATGGTGT	C	GGATCCCAAGTTTTTATGGA	0.999
ccmFN	263	88	CCA->CUA	Pro->Leu	TTTATCATGGTGTCGGATCC	C	AAGTTTTTATGGATTCCTTC	1
ccmFN	283	95	CUU->UUU	Leu->Phe	CAAGTTTTTATGGATTCCTT	C	TTTGTTACCGGGGTCGACCC	0.995
ccmFN	375	125	UUC->UUU	Phe->Phe	TCTTCCTTTGTCTCGAACTT	C	GTGAAGAACTCCATTCTATC	0.995
ccmFN	719	240	CCU->CUU	Pro->Leu	CATTGCTTTGTTTTTCTCTC	C	TTTCCTATCAGCGAGTTCCG	0.999
ccmFN	728	243	UCA->UUA	Ser->Leu	GTTTTTCTCTCCTTTCCTAT	C	AGCGAGTTCCGATCCTTTTG	0.991
ccmFN	766	256	CGU->UGU	Arg->Cys	TTGTTCGAAATTTATTCGTT	C	GTACCGAACCGCTTGCAGAA	0.995
ccmFN	788	263	UCA->UUA	Ser->Leu	TACCGAACCGCTTGCAGAAT	C	AAATCCTGTTCCACAAGATC	0.981
ccmFN	800	267	CCA->CUA	Pro->Leu	TGCAGAATCAAATCCTGTTC	C	ACAAGATCCTATATCAGCTA	0.999
ccmFN	815	272	UCA->UUA	Ser->Leu	TGTTCCACAAGATCCTATAT	C	AGCTATACATCCTCCTTGCA	0.991
ccmFN	964	322	CGC->UGC	Arg->Cys	AAAAGAATGGAACGCTGCTT	C	GCTCTGCTGGATGCGTCGGA	0.993
ccmFN	1282	428	CGG->UGG	Arg->Trp	GAATTTGGATCTTGACATGT	C	GGTGGTTTTTAACCGTAGGC	0.992
ccmFN	1310	437	CCA->CUA	Pro->Leu	TTTAACCGTAGGCATCTTGC	C	AGGAAGTTGGTGGGCTCATC	1
ccmFN	1327	443	CAU->UAU	His->Tyr	TGCCAGGAAGTTGGTGGGCT	C	ATCATGAATTAGGTCGGGGT	1
ccmFN	1342	448	CGG->UGG	Arg->Trp	GGGCTCATCATGAATTAGGT	C	GGGGTGGCTGGTGGTTTCGG	0.999
ccmFN	1360	454	CGG->UGG	Arg->Trp	GTCGGGGTGGCTGGTGGTTT	C	GGGATCCCGTAGAAAATGCT	0.999
ccmFN	1393	465	CGG->UGG	Arg->Trp	AAAATGCTTCTTTTATGCCT	C	GGGTATTAGCCACAGCTCGT	1
ccmFN	1411	471	CGU->UGU	Arg->Cys	CTCGGGTATTAGCCACAGCT	C	GTATTCATTCAGTAATTCTA	0.996
ccmFN	1454	485	UCC->UUC	Ser->Phe	CCTTCTTCATTCTTGGACCT	C	CTTTCTTAATATTGTGACTC	0.986
ccmFN	1474	492	CUU->UUU	Leu->Phe	CCTTTCTTAATATTGTGACT	C	TTCCATGCTGTGTCTCAGGA	0.999
ccmFN	1478	493	CCA->CUA	Pro->Leu	TCTTAATATTGTGACTCTTC	C	ATGCTGTGTCTCAGGAACCT	0.995
ccmFN	1490	497	UCA->UUA	Ser->Leu	GACTCTTCCATGCTGTGTCT	C	AGGAACCTTTTCAATACGGT	1
ccmFN	1525	509	CCC->UCC	Pro->Ser	TACGGTCTGGATTGCTAGCT	C	CCGTTCATAGTTTTGCTACA	1
cob	286	96	CUC->UUC	Leu->Phe	CTAATGGGGCAAGTATGTTT	C	TCATTGTGGTTCACCTTCAT	0.999
cob	298	100	CAC->UAC	His->Tyr	GTATGTTTCTCATTGTGGTT	C	ACCTTCATATTTTTCGTGGT	0.999
cob	325	109	CAU->UAU	His->Tyr	ATATTTTTCGTGGTCTATAT	C	ATGCGAGTTATAGCAGTCCT	1
cob	407	136	ACA->AUA	Thr->Ile	AATGATTTTGACAGCTTTTA	C	AGGATACGTACTACCTTGGG	0.989
cob	568	190	CAU->UAU	His->Tyr	ATCGTTTTTTTAGTCTTCAT	C	ATTTACTCCCCTTTATTTTA	0.997
cob	853	285	CAU->UAU	His->Tyr	AATGGTATTTCCTACCGATC	C	ATGCCATTCTTCGTAGTATA	0.999
cob	908	303	CCA->CUA	Pro->Leu	AGGTGTAGCCGCAATAGCAC	C	AGTTTTTATATGTCTGTTGG	0.998
cob	982	328	CAC->UAC	His->Tyr	GTTCAAGTTTTCGCCCGATT	C	ACCAAGGAATATTTTGGTTG	0.999
cob	1081	361	CCU->UCU	Pro->Ser	TTGTTACTATTGGACAAATT	C	CTCCTTTTGTTTTCTTCTTG	0.997
cob	1084	362	CCU->UCU	Pro->Ser	TTACTATTGGACAAATTCCT	C	CTTTTGTTTTCTTCTTGTTT	0.994
cob	1124	375	CCG->CUG	Pro->Leu	TTTTGCCATAACGCCCATTC	C	GGGACGAGTTGGAAGAGGAA	0.995
cox1	11	4	CCG->CUG	Pro->Leu	TCTCCATTTTATGACAAATC	C	GGTCCGATGGCTGTTCTCCA	0.999
cox1	15	5	GUC->GUU	Val->Val	CATTTTATGACAAATCCGGT	C	CGATGGCTGTTCTCCACTAA	0.988
cox1	242	81	UCU->UUU	Ser->Phe	GCCAGCGATGATAGGTGGAT	C	TGGTAATTGGTCTGTTCCGA	0.996
cox1	254	85	UCU->UUU	Ser->Phe	AGGTGGATCTGGTAATTGGT	C	TGTTCCGATTCTGATAGGTG	1
cox1	443	148	UCA->UUA	Ser->Leu	TTCTGGAGGAGCAGTTGATT	C	AGCAATTTCTAGTCTTCATC	0.996
cox1	452	151	UCU->UUU	Ser->Phe	AGCAGTTGATTCAGCAATTT	C	TAGTCTTCATCTATCTGGTG	1
cox1	515	172	UCC->UUC	Ser->Phe	CAATTTTATAACAACTATCT	C	CAACATGCGTGGACCTGGAA	1
cox1	551	184	UCA->UUA	Ser->Leu	TGGAATGACTATGCATAGAT	C	ACCCCTATTTGTGTGGTCCG	1
cox1	590	197	CCA->CUA	Pro->Leu	CGTTCTAGTGACAGCATTCC	C	ACTGTTATTATCACTTCCGG	0.998
cox1	668	223	UCU->UUU	Ser->Phe	AAACTTTAATACAACCTTTT	C	TGATCCCGCTGGAGGGGGAG	0.999
cox1	715	239	CGG->UGG	Arg->Trp	TATTATACCAGCATCTCTTT	C	GGTTCTTCGGTCATCCAGAG	0.997
cox1	746	249	CCC->CUC	Pro->Leu	TCATCCAGAGGTGTATATTC	C	CATTCTGCCTGGATCCGGTA	0.998
cox1	761	254	UCC->UUC	Ser->Phe	TATTCCCATTCTGCCTGGAT	C	CGGTATCATAAGTCATATCG	0.996
cox1	1186	396	CAC->UAC	His->Tyr	TTGCTTTATTTGCAGGATTT	C	ACTATTGGGTGGGTAAAATC	1
cox1	1405	469	CGG->UGG	Arg->Trp	TATCCGTAGTTGGGATTTGT	C	GGTTCTTCGTGGTCGTAACA	0.999
cox1	1433	478	UCA->UUA	Ser->Leu	CGTGGTCGTAACAATCACTT	C	AAGCAGTGGAAATAACAAAA	0.999
cox1	1489	497	CCA->UCA	Pro->Ser	CTTGGGCTGTTGAACAGAAT	C	CAACCACACTGGAATGGATG	0.998
cox2	38	13	CCU->CUU	Pro->Leu	GTTATTCCTAACAATTGCTC	C	TTGTGATGCAGCGGAACCAT	0.962
cox2	71	24	UCU->UUU	Ser->Phe	GGAACCATGGCAATTAGGAT	C	TCAAGACGCAGCAACACCTA	1
cox2	163	55	CGG->UGG	Arg->Trp	TAATTGTGGTTTTCGTATTA	C	GGATCTTGGTTCGCGCTTTA	0.994
cox2	253	85	CGG->UGG	Arg->Trp	GAACTACTATCGAGATTCTT	C	GGACCATCTTTCCTAGTCTC	0.99
cox2	278	93	CCG->CUG	Pro->Leu	CATCTTTCCTAGTCTCATCC	C	GATGTTCATTGCTATACCAT	0.973
cox2	379	127	CGG->UGG	Arg->Trp	CTATTGGACATCAATGGTAT	C	GGACTTATGAGTATTCAGAC	0.998
cox2	443	148	ACG->AUG	Thr->Met	ACTCACTTTTGACAGTTATA	C	GATTCCAGAAGATGATCTAG	0.999
cox2	476	159	UCA->UUA	Ser->Leu	TGATCTAGAATTGGGTCAAT	C	ACGTTTATTAGAAGTGGACA	1
cox2	544	182	CCU->UCU	Pro->Ser	ATATACGTATTATTGTAACA	C	CTGCTGATGTACCTCATAGT	1
cox2	557	186	CCU->CUU	Pro->Leu	TGTAACACCTGCTGATGTAC	C	TCATAGTTGGGCTGTACCTT	0.996
cox2	581	194	UCA->UUA	Ser->Leu	TAGTTGGGCTGTACCTTCCT	C	AGGTGTCAAATGTGATGCCG	1
cox2	632	211	UCG->UUG	Ser->Leu	TTTAAATCAGATCTCTATTT	C	GGTACAACGAGAAGGAGTTT	0.999
cox2	698	233	ACG->AUG	Thr->Met	TGGAACTAATCATGCCTTTA	C	GCCTATCGTCGTAGAAGCTG	1
cox2	721	241	CCU->UCU	Pro->Ser	CTATCGTCGTAGAAGCTGTT	C	CTAGGAAAGATTATGGTTCT	0.999
cox2	742	248	CGG->UGG	Arg->Trp	CTAGGAAAGATTATGGTTCT	C	GGGTATCCAATCAATTAATC	0.999
cox3	289	97	CUU->UUU	Leu->Phe	TCGTATCGGAGGTTATGTTC	C	TTTTTGCTTTTTTTTGGGCT	1
cox3	311	104	UCU->UUU	Ser->Phe	TTTTGCTTTTTTTTGGGCTT	C	TTTTCATTCTTCTTTGGCAC	0.998
cox3	413	138	CCU->CUU	Pro->Leu	AATCCCTTTTCTTAATACCC	C	TATTCTCCTTTCATCCGGAG	0.995
cox3	512	171	UCA->UUA	Ser->Leu	TGCTTTAGTAGCTACCGTTT	C	ACTGGCTCTAGTATCCACTG	1
cox3	527	176	UCC->UUC	Ser->Phe	CGTTTCACTGGCTCTAGTAT	C	CACTGGCTTTCAAGGAATGG	1
cox3	754	252	CGG->UGG	Arg->Trp	GGCATTTTGTAGACGTGGTT	C	GGTTATTCCTATTTGTCTCT	1
matR	32	11	UCC->UUC	Ser->Phe	GATCAGAATGGTACTCGAAT	C	CATTTACGACCCCGAGTTTC	0.9
matR	326	109	CCA->CUA	Pro->Leu	TGTACTACTATCGGCCCTAC	C	AGGCAACATCTACCTACACA	0.995
matR	413	138	UCG->UUG	Ser->Leu	GATTGTTCAGAGAATCAGAT	C	GGTTCTATTAAGGACAGGTC	0.973
matR	1679	560	UCC->UUC	Ser->Phe	CGGAGACATCGTAAATTGGT	C	CGCGGGCATCGCGATAAGTC	0.996
matR	1700	567	CCU->CUU	Pro->Leu	CGCGGGCATCGCGATAAGTC	C	TCTGTCCTACTACAGGTGCC	0.999
matR	1720	574	CGC->UGC	Arg->Cys	CTCTGTCCTACTACAGGTGC	C	GCGACAACCTTTACCAAGTC	1
matR	1734	578	UAC->UAU	Tyr->Tyr	AGGTGCCGCGACAACCTTTA	C	CAAGTCCGAACGATTGTCGA	0.996
matR	1756	586	CAC->UAC	His->Tyr	AAGTCCGAACGATTGTCGAC	C	ACCAGATCCGCTGGTCTGCA	0.995
matR	1826	609	CCA->CUA	Pro->Leu	CTCGGCGCGGAATATAATCC	C	AAAGTACTCCAAAGACTCAA	0.998
matR	1844	615	UCA->UUA	Ser->Leu	CCCAAAGTACTCCAAAGACT	C	AAATATTGTAAATCAAGAAG	1
mttB	16	6	CAU->UAU	His->Tyr	TATATATATCCTATGAATTT	C	ATTTCGCACCGGAAACTATT	0.987
mttB	25	9	CCG->UUG	Pro->Leu	CCTATGAATTTCATTTCGCA	C	CGGAAACTATTCTAGGAGAA	0.987
mttB	26	9	CCG->UUG	Pro->Leu	CTATGAATTTCATTTCGCAC	C	GGAAACTATTCTAGGAGAAG	0.985
mttB	59	20	UCC->UUC	Ser->Phe	AGGAGAAGTTCGAATCCGTT	C	CGTTCGGATATTGATCGGTC	0.946
mttB	64	22	CGG->UGG	Arg->Trp	AAGTTCGAATCCGTTCCGTT	C	GGATATTGATCGGTCTTGGT	0.987
mttB	112	38	CCG->UCG	Pro->Ser	GGTTTACGTGTTACTGGTTC	C	CGGAAGAGTTAATCTTTCCA	1
mttB	131	44	CCA->CUA	Pro->Leu	CCCGGAAGAGTTAATCTTTC	C	ATTAGCTAAACCCTTTCTTA	0.992
mttB	178	60	CGU->UGU	Arg->Cys	CTTTGGACTCGTATTTTGTT	C	GTACACAATCAACGGAGGCC	0.998
mttB	188	63	UCA->UUA	Ser->Leu	GTATTTTGTTCGTACACAAT	C	AACGGAGGCCTTCCCGACAT	1
mttB	202	68	CCG->UCG	Pro->Ser	CACAATCAACGGAGGCCTTC	C	CGACATATGTTGCAACGTCT	0.999
mttB	262	88	CAU->UAU	His->Tyr	TCGTCTTTCCTTTAATAAGT	C	ATCAAATTTGGTGCTTTTTG	0.998
mttB	328	110	CUC->UUC	Leu->Phe	GGACGAAATACAATAGATTC	C	TCCATTTAAGTGGTTTTCGC	0.983
mttB	331	111	CAU->UAU	His->Tyr	CGAAATACAATAGATTCCTC	C	ATTTAAGTGGTTTTCGCTTC	0.992
mttB	346	116	CGC->UGC	Arg->Cys	TCCTCCATTTAAGTGGTTTT	C	GCTTCTCCTTGTTCCTGTTC	0.998
mttB	373	125	CCU->UUU	Pro->Phe	CCTTGTTCCTGTTCCTAACT	C	CTCCCCGGGTAGTTCCCAAT	0.948
mttB	374	125	CCU->UUU	Pro->Phe	CTTGTTCCTGTTCCTAACTC	C	TCCCCGGGTAGTTCCCAATG	0.998
mttB	376	126	CCC->UCC	Pro->Ser	TGTTCCTGTTCCTAACTCCT	C	CCCGGGTAGTTCCCAATGTT	0.99
mttB	379	127	CGG->UGG	Arg->Trp	TCCTGTTCCTAACTCCTCCC	C	GGGTAGTTCCCAATGTTTGG	0.995
mttB	472	158	CAU->UAU	His->Tyr	TACAACCTAAGATCTACGAC	C	ATATTATGTTAACTGTTCGT	0.995
mttB	497	166	UCG->UUG	Ser->Leu	TATGTTAACTGTTCGTATTT	C	GTTCATTCCATCGGTATGCT	0.994
mttB	505	169	CCA->UCA	Pro->Ser	CTGTTCGTATTTCGTTCATT	C	CATCGGTATGCTCTCAGGTA	0.978
mttB	541	181	CGU->UGU	Arg->Cys	AGGTACCTGTTATTGTGATC	C	GTTTGCCAGAACCAAGGGGT	0.991
mttB	548	183	CCA->CUA	Pro->Leu	TGTTATTGTGATCCGTTTGC	C	AGAACCAAGGGGTCTTTCTG	0.992
mttB	554	185	CCA->CUA	Pro->Leu	TGTGATCCGTTTGCCAGAAC	C	AAGGGGTCTTTCTGTGGAAA	0.998
mttB	578	193	UCC->UUC	Ser->Phe	GGGTCTTTCTGTGGAAACCT	C	CACGAAAAATCGTCGTTTTT	0.998
mttB	610	204	CCG->UCG	Pro->Ser	GTCGTTTTTTTATGGTTTTT	C	CGCTTCTCACAGCTGCTCTT	0.996
mttB	660	220	AUC->AUU	Ile->Ile	CCGGATATCTGGTGCCAAAT	C	GTCGCCCGTTTCCTTATTTC	0.997
mttB	667	223	CGU->UGU	Arg->Cys	TCTGGTGCCAAATCGTCGCC	C	GTTTCCTTATTTCTTTGATA	0.997
mttB	672	224	UUC->UUU	Phe->Phe	TGCCAAATCGTCGCCCGTTT	C	CTTATTTCTTTGATAATAGA	0.932
mttB	713	238	UCG->UUG	Ser->Leu	GTTGGCTATCTTTGTGGCAT	C	GATTGTACAAGTTCGTGAAG	0.999
nad1	167	56	UCG->UUG	Ser->Leu	ACAACCTCTAGCAGATGGTT	C	GAAATTGATTCTAAAAGAAC	1
nad1	215	72	UCC->UUC	Ser->Phe	ACCAAGTAGTGCTAATTTCT	C	CCTTTTTAGAATGGCTCCAG	1
nad1	265	89	CGG->UGG	Arg->Trp	TTATGTTAAGTCTGGTCGCT	C	GGGCCGTTGTACCTTTTGAT	0.999
nad1	307	103	CCG->UUG	Pro->Leu	ATGGTATGGTATTGTCAGAT	C	CGAACATAGGGCTACTTTAT	0.995
nad1	308	103	CCG->UUG	Pro->Leu	TGGTATGGTATTGTCAGATC	C	GAACATAGGGCTACTTTATT	1
nad1	368	123	ACA->AUA	Thr->Ile	AGGTGTTTATGGAATTATTA	C	AGCGGGTCGGTCTAGTAATT	0.997
nad1	376	126	CGG->UGG	Arg->Trp	ATGGAATTATTACAGCGGGT	C	GGTCTAGTAATTCGAAATAT	0.99
nad1	436	146	CCU->UCU	Pro->Ser	GATCTGCAGCTCAAATGGTC	C	CTTATGAAGTCTCTATTGGT	0.998
nad1	490	164	CCC->UCU	Pro->Ser	CTGTACTAATATGTGTAGGT	C	CCCGTAATTCGAGTGAGATT	0.997
nad1	492	164	CCC->UCU	Pro->Ser	GTACTAATATGTGTAGGTCC	C	CGTAATTCGAGTGAGATTGT	0.989
nad1	493	165	CGU->UGU	Arg->Cys	TACTAATATGTGTAGGTCCC	C	GTAATTCGAGTGAGATTGTC	0.995
nad1	500	167	UCG->UUG	Ser->Leu	ATGTGTAGGTCCCCGTAATT	C	GAGTGAGATTGTCATGGCGC	1
nad1	536	179	UCU->UUU	Ser->Phe	GGCGCAAAAGCAGATATGGT	C	TGGTATTCCCTTGTTCCCTG	0.998
nad1	573	191	UUC->UUU	Phe->Phe	CCTGTATTGGTTATGTTCTT	C	ATTTCTCGTCTAGCAGAAAC	1
nad1	580	194	CGU->UGU	Arg->Cys	TGGTTATGTTCTTCATTTCT	C	GTCTAGCAGAAACTAATCGA	1
nad1	635	212	UCA->UUA	Ser->Leu	CCCAGAAGCGGAAGCTGAAT	C	AGTTGCAGGCTATAATGTAG	0.999
nad1	725	242	CCA->CUA	Pro->Leu	TATGATCTTAATGAGTGGTC	C	ATGCACATCGCTCTCTCCAG	0.995
nad1	734	245	UCG->UUG	Ser->Leu	AATGAGTGGTCCATGCACAT	C	GCTCTCTCCAGGGGGTTGGC	0.958
nad1	743	248	CCA->CUA	Pro->Leu	TCCATGCACATCGCTCTCTC	C	AGGGGGTTGGCCGCCTATCC	0.977
nad1	755	252	CCG->CUG	Pro->Leu	GCTCTCTCCAGGGGGTTGGC	C	GCCTATCCTAGATCTTCCCA	0.933
nad1	802	268	CGG->UGG	Arg->Trp	AGAAGATCCCGGGCTCGATC	C	GGTTTAGTATCAAGGTGATT	1
nad1	823	275	CUC->UUC	Leu->Phe	GGTTTAGTATCAAGGTGATT	C	TCTTTCTCTTTCTATATATA	0.98
nad1	898	300	CGG->UGG	Arg->Trp	ATCAATTAATGGGACTTGGC	C	GGAAAGTGTTCTTGCCTCTA	0.999
nad1	928	310	CGG->UGG	Arg->Trp	TCTTGCCTCTATCATTAGCC	C	GGGTAGTCCCCGTTTCTGGT	0.998
nad1	937	313	CCC->UCC	Pro->Ser	TATCATTAGCCCGGGTAGTC	C	CCGTTTCTGGTGTTTTAGTC	0.98
nad2	26	9	UCC->UUC	Ser->Phe	CAATCTTTTTTTAGCGGTTT	C	CCCAGAGATCTTTCTCATTA	0.997
nad2	56	19	UCC->UUC	Ser->Phe	CTTTCTCATTAATGCAACCT	C	CATTTTGCTCATTCATGGAG	1
nad2	223	75	CUU->UUU	Leu->Phe	CCCATTTATTCTGGAATAAT	C	TTTTTAGGAGGGACAATTTT	0.997
nad2	308	103	UCU->UUU	Ser->Phe	CATTTCGATGTGTTTCGATT	C	TTCCGAACAAGAGAGGTTTG	0.997
nad2	311	104	UCC->UUC	Ser->Phe	TTCGATGTGTTTCGATTCTT	C	CGAACAAGAGAGGTTTGATG	0.999
nad2	367	123	CGC->UGC	Arg->Cys	TATTAATTCTACTTACTACT	C	GCAGTATGCTCTTTATGATC	0.993
nad2	394	132	CAU->UAU	His->Tyr	TGCTCTTTATGATCTCGGCT	C	ATGATTCAATTGCCATGTAT	0.997
nad2	401	134	UCA->UUA	Ser->Leu	TATGATCTCGGCTCATGATT	C	AATTGCCATGTATTTAGCTA	0.995
nad2	428	143	CCU->CUU	Pro->Leu	CATGTATTTAGCTATTGAGC	C	TCAAAGTTTATGTTTTTATG	0.999
nad2	497	166	UCG->UUG	Ser->Leu	ATTTTCCACGGAAGCCGGCT	C	GAAATATTTGATCTTAGGTG	0.999
nad2	523	175	CCC->UCC	Pro->Ser	ATTTGATCTTAGGTGCATTT	C	CCTCTGGAATATTATTGTTT	0.997
nad2	662	221	UCU->UUU	Ser->Phe	TATTTTTATGGGGATTTTAT	C	TATCGCTGTAGGATTCCTAT	0.992
nad2	800	267	UCA->UUA	Ser->Leu	CTCTATTTTTGCTAATATTT	C	ACGTGTTTCTATTTATGGTT	0.966
nad2	809	270	UCU->UUU	Ser->Phe	TGCTAATATTTCACGTGTTT	C	TATTTATGGTTCCTATGGAG	0.998
nad2	920	307	CCU->CUU	Pro->Leu	CCAAACGAAAGTCAAAAGAC	C	TCTAGCTCATAGTTCAATTG	0.999
nad2	928	310	CAU->UAU	His->Tyr	AAGTCAAAAGACCTCTAGCT	C	ATAGTTCAATTGGACATGTA	0.995
nad2	958	320	CGU->UGU	Arg->Cys	TTGGACATGTAGGTTATATT	C	GTACTGGTTTCTCATGTGGA	1
nad2	962	321	ACU->AUU	Thr->Ile	ACATGTAGGTTATATTCGTA	C	TGGTTTCTCATGTGGAACTA	0.994
nad2	1058	353	UCA->UUA	Ser->Leu	AGCTGCATTCGCCATAGTTT	C	AGCATTACGGCAAACCCGTG	0.999
nad2	1127	376	UCG->UUG	Ser->Leu	AGCCAAAACGAATCCTATTT	C	GGCTATTACCTTCTCCATTA	0.999
nad2	1246	416	CUA->UUA	Leu->Leu	TTGGGGCTTACTTCCTAGCC	C	TAGTGGGACTAGTTTCTAGC	0.942
nad2	1298	433	GCG->GUG	Ala->Val	TTTTTATTATATACGCTTAG	C	GAAAAGAATGTTTTTTGATA	1
nad2	1400	467	UCA->UUA	Ser->Leu	GACTTCCTCTTTTATTACTT	C	ATCCTTTCTATATCCCTCTC	0.914
nad2	1403	468	UCC->UUC	Ser->Phe	TTCCTCTTTTATTACTTCAT	C	CTTTCTATATCCCTCTCCTT	0.946
nad2	1408	470	CUA->UUA	Leu->Leu	CTTTTATTACTTCATCCTTT	C	TATATCCCTCTCCTTTCTTC	0.917
nad2	1457	486	UCA->UUA	Ser->Leu	TCATCAAATGGCACTCAGTT	C	ATATCTTTAAGTTCGATCAT	1
nad3	5	2	UCA->UUA	Ser->Leu	GAAGTGGGCTGTGGTGATGT	C	AGAATTTGCACCTATTTTTA	0.957
nad3	44	15	CCG->CUG	Pro->Leu	TATCTATTTAGTGATCAGTC	C	GCTAGTTTCTTTGATCCCAC	1
nad3	62	21	CCA->CUA	Pro->Leu	TCCGCTAGTTTCTTTGATCC	C	ACTCGGTCTTCCTTTTCCAT	0.999
nad3	80	27	CCA->CUA	Pro->Leu	CCCACTCGGTCTTCCTTTTC	C	ATTTTCTTCCAATAGTTCGA	0.983
nad3	146	49	UCC->UUC	Ser->Phe	CGAATGTGGTTTCGATCCTT	C	CGGTGATGCCAGAAGTCGTT	1
nad3	208	70	CCU->UUU	Pro->Phe	TTTCAATTTTATTTATTATC	C	CTGATCTTGAAGTAACCTTT	0.911
nad3	209	70	CCU->UUU	Pro->Phe	TTCAATTTTATTTATTATCC	C	TGATCTTGAAGTAACCTTTT	0.982
nad3	230	77	UCC->UUC	Ser->Phe	TGATCTTGAAGTAACCTTTT	C	CTTTCCTTGGGCAGTACCTC	0.999
nad3	247	83	CCU->UCU	Pro->Ser	TTTCCTTTCCTTGGGCAGTA	C	CTCCCAACAAGATTGATCCG	0.992
nad3	251	84	CCC->CUC	Pro->Leu	CTTTCCTTGGGCAGTACCTC	C	CAACAAGATTGATCCGTTTG	0.998
nad3	266	89	CCG->CUG	Pro->Leu	ACCTCCCAACAAGATTGATC	C	GTTTGGATTTTGGTCCATGA	1
nad3	317	106	UCU->UUU	Ser->Phe	ATTGATTTTGACGATTGGAT	C	TCTCTATGAATGGAAAAGGG	1
nad3	344	115	UCG->UUG	Ser->Leu	TGAATGGAAAAGGGGTGCTT	C	GGATCGGGAGTAATCACTAG	0.998
nad3	349	117	CGG->UGG	Arg->Trp	GGAAAAGGGGTGCTTCGGAT	C	GGGAGTAATCACTAGTGATA	1
nad4	29	10	UCU->UUU	Ser->Phe	ACATTTCTGTGAATGCTATT	C	TGATTTAAGTGGTCCTATTC	1
nad4	44	15	CCU->CUU	Pro->Leu	CTATTCTGATTTAAGTGGTC	C	TATTCTGTGTCCCGTGCTAG	0.997
nad4	74	25	ACU->AUU	Thr->Ile	TCCCGTGCTAGGAAGCATTA	C	TCCTCTTTTCATTCCAAATT	0.997
nad4	77	26	CCU->CUU	Pro->Leu	CGTGCTAGGAAGCATTACTC	C	TCTTTTCATTCCAAATTCAA	0.999
nad4	107	36	CCG->CUG	Pro->Leu	TCCAAATTCAAGAATACGAC	C	GATACGATTGATTGGTCTGT	0.999
nad4	158	53	CCU->CUU	Pro->Leu	TATTACTTTTTTTTATTCCC	C	TGTTCCTCGGATACAATTCG	0.99
nad4	164	55	CCU->CUU	Pro->Leu	TTTTTTTTATTCCCCTGTTC	C	TCGGATACAATTCGATCCTT	0.997
nad4	166	56	CGG->UGG	Arg->Trp	TTTTTTATTCCCCTGTTCCT	C	GGATACAATTCGATCCTTCT	0.999
nad4	197	66	UCU->UUU	Ser->Phe	CGATCCTTCTACGGCCAAAT	C	TCAATTTGTGGAAAGCCTTC	0.998
nad4	362	121	ACA->AUA	Thr->Ile	TTATGGGAAAGAGTATATTA	C	AGCATCGCTAATTCGTGAAT	0.993
nad4	368	123	UCG->UUG	Ser->Leu	GAAAGAGTATATTACAGCAT	C	GCTAATTCGTGAATTTCTAA	0.995
nad4	376	126	CGU->UGU	Arg->Cys	ATATTACAGCATCGCTAATT	C	GTGAATTTCTAATGATCGCC	0.986
nad4	403	135	CGC->UGC	Arg->Cys	TTCTAATGATCGCCGTGTTC	C	GCATGCTGGATCTTCTACTA	1
nad4	433	145	CUU->UUU	Leu->Phe	ATCTTCTACTATTCTATGTT	C	TTCCCGAAAGCGTGCCAATC	0.999
nad4	436	146	CCC->UUC	Pro->Phe	TTCTACTATTCTATGTTCTT	C	CCGAAAGCGTGCCAATCCCT	0.999
nad4	437	146	CCC->UUC	Pro->Phe	TCTACTATTCTATGTTCTTC	C	CGAAAGCGTGCCAATCCCTA	0.992
nad4	449	150	CCA->CUA	Pro->Leu	TGTTCTTCCCGAAAGCGTGC	C	AATCCCTATGTTCATTATTA	0.995
nad4	608	203	UCA->UUA	Ser->Leu	AACCACCGATTTACAAATAT	C	ATTAACCACAGAATTTAGTG	0.999
nad4	659	220	UCU->UUU	Ser->Phe	AATCTTTCTGTGGATTGCTT	C	TTTCGCCTCTTTCGCCGTCA	0.986
nad4	767	256	CCU->CUU	Pro->Leu	CGTCATCTTGGCAGGAATTC	C	TTCAAAATTGGGAACCCACG	0.997
nad4	770	257	UCA->UUA	Ser->Leu	CATCTTGGCAGGAATTCCTT	C	AAAATTGGGAACCCACGGGT	1
nad4	784	262	CAC->UAC	His->Tyr	TTCCTTCAAAATTGGGAACC	C	ACGGGTTTTTGAGATTTTCA	0.968
nad4	836	279	UCC->UUC	Ser->Phe	TCCCGAAGCGACACTTTGTT	C	CACTCCTTTCATTTATACTT	0.995
nad4	857	286	UCA->UUA	Ser->Leu	CACTCCTTTCATTTATACTT	C	AAGCGCGATTGCTATAATAT	1
nad4	977	326	CCG->CUG	Pro->Leu	GACTATTGGTATGTTTAGTC	C	GAACATACAGGGAATTGGAG	1
nad4	1006	336	CUA->UUA	Leu->Leu	AGGGAATTGGAGGTAGCATT	C	TACCGATGTTAAGTCATGGA	0.952
nad4	1010	337	CCG->CUG	Pro->Leu	AATTGGAGGTAGCATTCTAC	C	GATGTTAAGTCATGGACTGG	1
nad4	1033	345	CCU->UCU	Pro->Ser	TGTTAAGTCATGGACTGGTT	C	CTTCAGCCCTTTTTCTATGT	0.999
nad4	1101	367	UAC->UAU	Tyr->Tyr	ACTCGACTTGTTAGATATTA	C	GGAGGTTTAGTGAGCACCAT	0.964
nad4	1129	377	CUC->UUC	Leu->Phe	TAGTGAGCACCATGCCGAAT	C	TCTCTACCATTTTCTTCTCT	1
nad4	1148	383	UCU->UUU	Ser->Phe	TCTCTCTACCATTTTCTTCT	C	TTCTACTTTGGCCAATATGA	0.998
nad4	1151	384	UCU->UUU	Ser->Phe	CTCTACCATTTTCTTCTCTT	C	TACTTTGGCCAATATGAGTT	0.996
nad4	1172	391	UCA->UUA	Ser->Leu	TACTTTGGCCAATATGAGTT	C	ACCTGGTACTAGCAGCTTTA	1
nad4	1205	402	CCC->CUC	Pro->Leu	CAGCTTTATCGGAGAATTTC	C	CATCTTAGTAGGAGCTTTCC	0.999
nad4	1355	452	UCA->UUA	Ser->Leu	CCTCCATAAATTCTCCGATT	C	AAATGGCAGAGAAGTTTCCA	0.992
nad4	1373	458	UCC->UUC	Ser->Phe	TTCAAATGGCAGAGAAGTTT	C	CATTTTTATACCTTTTATTG	0.999
nad4	1405	469	CGG->UGG	Arg->Trp	CTTTTATTGTTGGAGTTGTT	C	GGATGGGTGTTCACCCCAAA	0.999
nad4	1417	473	CAC->UAC	His->Tyr	GAGTTGTTCGGATGGGTGTT	C	ACCCCAAAGTGTTCCCGGAC	0.999
nad4	1433	478	CCG->CUG	Pro->Leu	TGTTCACCCCAAAGTGTTCC	C	GGACTGCATGCATACATCCG	0.998
nad4L	2	1	ACG->AUG	Thr->Met	TACATTCCACGTTCCCGAAA	C	GGATCTTATAAAATATTTCA	0.999
nad4L	41	14	UCU->UUU	Ser->Phe	CACATTTTCTATGATTATCT	C	TATTTTAGGTATTCGGGGAA	1
nad4L	55	19	CGG->UGG	Arg->Trp	TTATCTCTATTTTAGGTATT	C	GGGGAATCCTCCTTAATAGA	0.997
nad4L	86	29	CCU->CUU	Pro->Leu	CCTTAATAGACGAAATATTC	C	TATTATGTCAATGCCAATTG	0.982
nad4L	95	32	UCA->UUA	Ser->Leu	ACGAAATATTCCTATTATGT	C	AATGCCAATTGAATCAATGT	1
nad4L	100	34	CCA->UCA	Pro->Ser	ATATTCCTATTATGTCAATG	C	CAATTGAATCAATGTTATTA	1
nad4L	110	37	UCA->UUA	Ser->Leu	TATGTCAATGCCAATTGAAT	C	AATGTTATTAGCAGTGAATT	0.994
nad4L	131	44	UCG->UUG	Ser->Leu	AATGTTATTAGCAGTGAATT	C	GAACTTTTTGGTCTTTTCTG	0.998
nad4L	158	53	UCG->UUG	Ser->Leu	TTTGGTCTTTTCTGTTTCTT	C	GGATGATATGATGGGTCAAT	0.995
nad4L	179	60	UCA->UUA	Ser->Leu	GGATGATATGATGGGTCAAT	C	ATTTGCTTCATTGGTTCCAA	1
nad4L	188	63	UCA->UUA	Ser->Leu	GATGGGTCAATCATTTGCTT	C	ATTGGTTCCAACAGTGGCAG	0.999
nad4L	197	66	CCA->CUA	Pro->Leu	ATCATTTGCTTCATTGGTTC	C	AACAGTGGCAGCTGCGGAAT	0.999
nad5	155	52	CCG->CUG	Pro->Leu	TGCTTTTTATGAAGTCGCAC	C	GGGAGCTAGTGCTTGCTATC	1
nad5	242	81	CCG->CUG	Pro->Leu	GGGCTTCTTGTTCGATAGCC	C	GACCGTAGTGATGTTAATTG	1
nad5	272	91	UCC->UUC	Ser->Phe	GATGTTAATTGTGGTTACAT	C	CATAAGTAGCTTGGTCCATC	0.999
nad5	315	105	UCC->UCU	Ser->Ser	TATTCCATTTCATATATGTC	C	GAGGATCCGCATAGCCCTCG	0.989
nad5	358	120	CUU->UUU	Leu->Phe	TTATGTGTTATTTATCCATT	C	TTACTTTTTTTATGCCAATG	0.994
nad5	374	125	CCA->CUA	Pro->Leu	CATTCTTACTTTTTTTATGC	C	AATGTTGGTGACTGGAGATA	0.997
nad5	398	133	UCU->UUU	Ser->Phe	GTTGGTGACTGGAGATAACT	C	TCTTCAATTATTCCTAGGAT	0.996
nad5	494	165	ACA->AUA	Thr->Ile	TCAGGCAGATAAAGCAGCTA	C	AAAAGCTATGCTTGTCAATC	1
nad5	539	180	CCU->CUU	Pro->Leu	AGGTGATTTTGGATTAGCTC	C	TGGGATTTCGGGTCGTTTTA	1
nad5	548	183	UCG->UUG	Ser->Leu	TGGATTAGCTCCTGGGATTT	C	GGGTCGTTTTACTCTCTTTC	0.998
nad5	553	185	CGU->UGU	Arg->Cys	TAGCTCCTGGGATTTCGGGT	C	GTTTTACTCTCTTTCAAACA	0.999
nad5	598	200	CGU->UGU	Arg->Cys	ACTTTTCAACCATTTTTGCT	C	GTGCTAGTGCCCCCAGAAAT	0.999
nad5	629	210	UCU->UUU	Ser->Phe	CCCCAGAAATTCTTTGATTT	C	TTGCAATATGAGATTGAATG	0.975
nad5	713	238	UCG->UUG	Ser->Leu	GAAATCTGCACAGATAGGAT	C	GCATACTTGGTCACCCGATG	0.999
nad5	725	242	UCA->UUA	Ser->Leu	GATAGGATCGCATACTTGGT	C	ACCCGATGCTATGGAGGGTC	1
nad5	764	255	UCG->UUG	Ser->Leu	TCCCACTCCAGTATCCGCTT	C	GATTCATGCAGCTACTATGG	0.995
nad5	835	279	CCA->UCA	Pro->Ser	GCTCCCCTTTATTTGAATAC	C	CACCTACGGCTTTGATTGTT	1
nad5	863	288	UCU->UUU	Ser->Phe	GGCTTTGATTGTTATTACTT	C	TGCAGGAGCTACGACGTCAT	0.999
nad5	875	292	ACG->AUG	Thr->Met	TATTACTTCTGCAGGAGCTA	C	GACGTCATTCCTTGCGGCAA	1
nad5	1310	437	UCA->UUA	Ser->Leu	TTCTTATTACTCTTTTCGTT	C	ACTTTTTCTAACATTTCTAG	0.999
nad5	1490	497	CCC->CUC	Pro->Leu	CAATTTTTGGGCCAATTCCC	C	CTTCGTACTACCAAAAAATG	0.999
nad5	1550	517	ACC->AUC	Thr->Ile	GTTTGCTGCTCCAACCATTA	C	CAAACTAATACCTATTCTGT	0.998
nad5	1580	527	UCA->UUA	Ser->Leu	ACCTATTCTGTTTAGTACTT	C	AGGTGCTTCTCTTGCGTATA	0.996
nad5	1589	530	UCU->UUU	Ser->Phe	GTTTAGTACTTCAGGTGCTT	C	TCTTGCGTATAATGTAAATC	0.99
nad5	1610	537	CCC->CUC	Pro->Leu	TCTTGCGTATAATGTAAATC	C	CGTAGCGGATCAATTCCAAC	0.984
nad5	1895	632	UCA->UUA	Ser->Leu	CTTTGCAATGTTACTTGGTT	C	AACTCTATTTGTGACTTTTT	0.993
nad5	1916	639	UCU->UUU	Ser->Phe	AACTCTATTTGTGACTTTTT	C	TCGTATGTGGGACTCTCTAT	0.996
nad5	1918	640	CGU->UGU	Arg->Cys	CTCTATTTGTGACTTTTTCT	C	GTATGTGGGACTCTCTATCT	1
nad6	26	9	CCU->CUU	Pro->Leu	ACTTTCTGTTTTGTCGAGCC	C	TGCTTTGGTCTCTGGTTTGA	0.999
nad6	53	18	GCA->GUA	Ala->Val	GGTCTCTGGTTTGATGGTTG	C	ACGTGCTAAAAATCCGGTAC	1
nad6	88	30	CCC->UUC	Pro->Phe	CGGTACATTCCGTTTTGTTT	C	CCATCCTAGTCTTTCGCGAC	0.992
nad6	89	30	CCC->UUC	Pro->Phe	GGTACATTCCGTTTTGTTTC	C	CATCCTAGTCTTTCGCGACA	1
nad6	103	35	CGC->UGC	Arg->Cys	TGTTTCCCATCCTAGTCTTT	C	GCGACATTTCAGGGTTACTT	0.969
nad6	146	49	UCC->UUC	Ser->Phe	TTTGTTAGGTCTCGACTTCT	C	CGCTATGATCTTCCCAGTAG	1
nad6	161	54	CCA->CUA	Pro->Leu	CTTCTCCGCTATGATCTTCC	C	AGTAGTTCATATAGGAGCTA	0.999
nad6	169	57	CAU->UAU	His->Tyr	CTATGATCTTCCCAGTAGTT	C	ATATAGGAGCTATAGCCGTT	1
nad6	191	64	UCA->UUA	Ser->Leu	TATAGGAGCTATAGCCGTTT	C	ATTCCTATTCGTTGTTATGA	0.999
nad6	446	149	UCC->UUC	Ser->Phe	TTTACTTTATACCTACTATT	C	CGTCTGGTTTTTGGTTCCTA	0.999
nad6	463	155	CCU->UCU	Pro->Ser	ATTCCGTCTGGTTTTTGGTT	C	CTAGTCTGATTTTATTAGTA	0.996
nad7	38	13	UCG->UUG	Ser->Leu	GCAAATAAAAAATTTCACTT	C	GAATTTCGGACCTCAACATC	0.995
nad7	45	15	UUC->UUU	Phe->Phe	AAAAATTTCACTTCGAATTT	C	GGACCTCAACATCCTGCTGC	0.997
nad7	77	26	UCG->UUG	Ser->Leu	TCCTGCTGCTCATGGTGTTT	C	GCGATCAGTATTGGAAATGA	0.996
nad7	83	28	UCA->UUA	Ser->Leu	TGCTCATGGTGTTTCGCGAT	C	AGTATTGGAAATGAACGGAG	0.999
nad7	200	67	UCU->UUU	Ser->Phe	TCTTCAAGCTTTACCTTATT	C	TGATCGTTCAGACTATGTTT	0.995
nad7	209	70	UCA->UUA	Ser->Leu	TTTACCTTATTCTGATCGTT	C	AGACTATGTTTCTACGATGG	0.989
nad7	224	75	ACG->AUG	Thr->Met	TCGTTCAGACTATGTTTCTA	C	GATGGCCCAAGAACACGCTC	1
nad7	244	82	CAU->UAU	His->Tyr	CGATGGCCCAAGAACACGCT	C	ATTCTTCAGCCGTAGAGAGA	0.999
nad7	251	84	UCA->UUA	Ser->Leu	CCAAGAACACGCTCATTCTT	C	AGCCGTAGAGAGACTTTTGA	0.993
nad7	316	106	CGU->UGU	Arg->Cys	AATATATACGAGTGTTATTC	C	GTGAAATAACTCGAATTTCA	0.997
nad7	335	112	UCA->UUA	Ser->Leu	CCGTGAAATAACTCGAATTT	C	AAATCATTCACTTGCTTTAA	0.999
nad7	344	115	UCA->UUA	Ser->Leu	AACTCGAATTTCAAATCATT	C	ACTTGCTTTAACTACTCATG	0.999
nad7	383	128	UCA->UUA	Ser->Leu	TGCTATGGATGTGGGAGCAT	C	AACTCCGTTCCTGTGGGCTT	1
nad7	533	178	UCC->UUC	Ser->Phe	ATGTCGAGATATTGATTCTT	C	CACACAACAATTTGCTTCTC	0.985
nad7	578	193	UCA->UUA	Ser->Leu	CGACGAATTAGAAGAGATGT	C	AACCGGAAACCGTATCTGGA	1
nad7	679	227	CCA->UCA	Pro->Ser	GTGGTGTAATGTTAAGAGGT	C	CAGGGGTATGCTGGGATTTG	0.995
nad7	724	242	CAU->UAU	His->Tyr	GAGCAGCACCTTACGATGTT	C	ATGACCAATCGGATCCTGAC	1
nad7	734	245	UCG->UUG	Ser->Leu	TTACGATGTTCATGACCAAT	C	GGATCCTGACGTACCAGTAG	1
nad7	739	247	CCU->UUU	Pro->Phe	ATGTTCATGACCAATCGGAT	C	CTGACGTACCAGTAGGTACC	0.999
nad7	740	247	CCU->UUU	Pro->Phe	TGTTCATGACCAATCGGATC	C	TGACGTACCAGTAGGTACCA	0.999
nad7	769	257	CGC->UGC	Arg->Cys	CAGTAGGTACCAGAGGAGAT	C	GCTATGATCGTTACTGTATC	1
nad7	789	263	AUC->AUU	Ile->Ile	CGCTATGATCGTTACTGTAT	C	CGTATCGAAGAGATGCGACA	0.922
nad7	836	279	CCU->CUU	Pro->Leu	TCGGATCATTGTGCAATGTC	C	TAATAAAATGCCTAGTGGCA	0.999
nad7	926	309	UCA->UUA	Ser->Leu	GAAACTATCCATGGAATCCT	C	AATTCACCATTTCGAACCTT	0.999
nad7	944	315	CCU->CUU	Pro->Leu	CTCAATTCACCATTTCGAAC	C	TTATACAGAAGGTTTTTCCG	0.999
nad7	973	325	CCU->UCU	Pro->Ser	AAGGTTTTTCCGTACCAGCT	C	CTTCTACCTATACCGCAGTT	0.999
nad7	1050	350	CCC->CCU	Pro->Pro	AGTAATGGAAGCAATCGTCC	C	TACCGTCGTAAAATAAGAGC	0.966
nad7	1057	353	CGU->UGU	Arg->Cys	GAAGCAATCGTCCCTACCGT	C	GTAAAATAAGAGCACCTGGC	0.998
nad7	1079	360	UCU->UUU	Ser->Phe	TAAAATAAGAGCACCTGGCT	C	TGCCCATTCACAAGGACTCG	0.999
nad7	1088	363	UCA->UUA	Ser->Leu	AGCACCTGGCTCTGCCCATT	C	ACAAGGACTCGATTCTATGT	0.996
nad7	1103	368	UCU->UUU	Ser->Phe	CCATTCACAAGGACTCGATT	C	TATGTCCAAACATCACATGC	0.999
nad7	1124	375	CCA->CUA	Pro->Leu	TATGTCCAAACATCACATGC	C	AGCAGATGTGGTCACCATCA	1
nad7	1137	379	GUC->GUU	Val->Val	CACATGCCAGCAGATGTGGT	C	ACCATCATAGGTACTCAAGA	0.941
nad7	1166	389	UCU->UUU	Ser->Phe	AGGTACTCAAGATATTGTGT	C	TGGAGAGGTGGATAGATAGG	1
nad9	83	28	UCU->UUU	Ser->Phe	ATGGGAAGATGGGAATAGAT	C	TGATACAGACTACGCATTTG	0.912
nad9	152	51	UCG->UUG	Ser->Leu	CTATACAAGGGTTCAAGTTT	C	GATCGATATTTGCGGAGTTG	0.998
nad9	175	59	CAU->UAU	His->Tyr	TCGATATTTGCGGAGTTGAT	C	ATCCCTCTCGAAAACTCAGA	0.997
nad9	283	95	CCG->UCG	Pro->Ser	ACGAAGTAACACGAATCTCT	C	CGGTAGTCAGTCTCTTTCCA	0.969
nad9	313	105	CGG->UGG	Arg->Trp	GTCTCTTTCCATCAGCCGGC	C	GGTGTGAGCGAGAAGTTTGG	0.998
nad9	353	118	UCC->UUC	Ser->Phe	GGATATGTTTGGTCTTTCTT	C	CATCAATCATCCGGATCTAC	0.999
nad9	383	128	UCA->UUA	Ser->Leu	TCCGGATCTACGCCGTATAT	C	AACAGATTATGGTTTCGAGG	0.998
nad9	424	142	CUU->UUU	Leu->Phe	GTCATCCATTACGAAAAGAC	C	TTCCTTTGAGTGGATATATG	0.955
rpl10	101	34	UCG->UUG	Ser->Leu	ATCATTCCATTCCAGTGGCT	C	GACCAGTAACCAATGGCGAA	0.998
rpl10	134	45	CCA->CUA	Pro->Leu	ATGGCGAAAACTCAAAAATC	C	ATGGTTTCCCGGTAGAACCC	0.994
rpl10	155	52	CCA->CUA	Pro->Leu	ATGGTTTCCCGGTAGAACCC	C	ATTTCGCCCAAGTTGTTGCG	0.975
rpl10	239	80	UCG->UUG	Ser->Leu	TGCAGGTCCCACTTGTATAT	C	GTATTTGGCCGAAGAAGCAT	0.994
rpl16	104	35	ACU->AUU	Thr->Ile	TGGTTTTGGAAGATATGGCA	C	TAAAAGTTGTAAAGCTGGTC	0.998
rpl16	164	55	ACA->AUA	Thr->Ile	TGAAGCAGCGCGTCGGGCTA	C	AATCGGACAATTCCATCGTG	1
rpl16	232	78	CUC->UUC	Leu->Phe	GTAAGATATGGGTAAGAGTT	C	TCGCAGATCTCCCTATTACC	0.995
rpl16	321	107	UCC->UCU	Ser->Ser	GGTTGGATTGCTCGTGTGTC	C	ACGGGACAAATCCTATTTGA	0.913
rpl16	401	134	CCA->CUA	Pro->Leu	TACATTAGCGGCGCATAAAC	C	ATGTTCGTCAACCAAGTTTG	0.997
rpl16	407	136	UCG->UUG	Ser->Leu	AGCGGCGCATAAACCATGTT	C	GTCAACCAAGTTTGTTCAGT	0.992
rpl2	215	72	CCA->CUA	Pro->Leu	TCGTTCTTCTCGGATCGCTC	C	AGTACGATGGATCGAGGGGG	0.996
rpl5	35	12	UCA->UUA	Ser->Leu	TTTTCATTACGAAGATGTAT	C	ACGTCAGGATCCGTTGCTCA	0.99
rpl5	47	16	CCG->CUG	Pro->Leu	AGATGTATCACGTCAGGATC	C	GTTGCTCAAACCGAATCACG	0.998
rpl5	59	20	CCG->CUG	Pro->Leu	TCAGGATCCGTTGCTCAAAC	C	GAATCACGCCAACGTTATGG	0.998
rpl5	64	22	CAC->UAC	His->Tyr	ATCCGTTGCTCAAACCGAAT	C	ACGCCAACGTTATGGAAGTT	0.94
rpl5	92	31	UCG->UUG	Ser->Leu	CGTTATGGAAGTTCCTGGAT	C	GTGTGAAATAAGAGTAGTAC	0.999
rpl5	169	57	CCG->UCG	Pro->Ser	GAAAATTGGCTATGGAGATT	C	CGCGCGGTCAGAAATTCATA	0.96
rpl5	172	58	CGC->UGC	Arg->Cys	AATTGGCTATGGAGATTCCG	C	GCGGTCAGAAATTCATACAG	1
rpl5	320	107	UCG->UUG	Ser->Leu	GCATGGAATGTCTAATTTTT	C	GGTCAGAATCTCGACGGTAA	0.99
rpl5	332	111	UCG->UUG	Ser->Leu	TAATTTTTCGGTCAGAATCT	C	GACGGTAATGTCTTTGTTAG	0.953
rpl5	515	172	CCA->CUA	Pro->Leu	CACACAAGATGAGACTTTAC	C	ACCGTGGAGCGGCTTTTTGC	0.994
rpl5	518	173	CCG->CUG	Pro->Leu	ACAAGATGAGACTTTACCAC	C	GTGGAGCGGCTTTTTGCAAA	0.999
rps1	158	53	CCU->CUU	Pro->Leu	AATTTGTATGCAAGATGAGC	C	TACAGGAGTGCCAATCAACC	0.996
rps1	209	70	UCC->UUC	Ser->Phe	GTTTGAGAATAAGGTGGGAT	C	CACAGATCTAGTGGCCGGTG	0.981
rps10	62	21	ACG->AUG	Thr->Met	AGAAAGACCACCAAAAGTAA	C	GACCACCAAGATACGCATAG	0.999
rps10	76	26	CGC->UGC	Arg->Cys	AAGTAACGACCACCAAGATA	C	GCATAGTGATTCGATCTTTT	0.949
rps10	298	100	CGG->UGG	Arg->Trp	AATTGCGCAAGAAGTTCTTT	C	GGTTAAAACGCCAGCGTATA	1
rps10	362	121	UCG->UUG	Ser->Leu	ATTTTCTTGCAAGACCCGTT	C	GGATAAGGGAAAACTCCAGA	0.998
rps12	100	34	CGC->UGC	Arg->Cys	GTCCCCAGAAGCAAGGAGTA	C	GCCCGCGTGTTTCAACGAGA	0.999
rps12	104	35	CCG->CUG	Pro->Leu	CCAGAAGCAAGGAGTACGCC	C	GCGTGTTTCAACGAGAACAC	1
rps12	196	66	CAC->UAC	His->Tyr	ATCGACATGATATATTTGCT	C	ACATTCCGGGCGAAGGCCAT	0.994
rps12	221	74	UCG->UUG	Ser->Leu	TCCGGGCGAAGGCCATAATT	C	GCAGGAACATTCTATGGTCT	0.973
rps12	269	90	UCG->UUG	Ser->Leu	AGGTGGTAGAGTGAAAGATT	C	GCCAGGTGTGAAATCCCATT	0.983
rps12	284	95	UCC->UUC	Ser->Phe	AGATTCGCCAGGTGTGAAAT	C	CCATTGTATTCGAGGAGTCA	1
rps13	37	13	CGU->UGU	Arg->Cys	CTAAAAAAGCCATTCAGGTT	C	GTTGTCGATTAGGTATCAGT	0.938
rps13	180	60	UUC->UUU	Phe->Phe	CGAGCAGACATCGAACGATT	C	ATTTCTATTTCTTGTTATCG	0.995
rps13	224	75	UCG->UUG	Ser->Leu	AATTCGTCATCAAGATGGAT	C	GCCCTTACGCGGTCAACGAA	0.999
rps19	116	39	UCG->UUG	Ser->Leu	GTCACGTAGATCTTCTATTT	C	GCCGGAATTCGTAAATTGCT	0.96
rps19	163	55	CCU->UUU	Pro->Phe	AAATTTACAATGGAAAAACT	C	CTGTTCGTTGTAAGATCACT	0.974
rps19	164	55	CCU->UUU	Pro->Phe	AATTTACAATGGAAAAACTC	C	TGTTCGTTGTAAGATCACTG	0.947
rps3	64	22	CGG->UGG	Arg->Trp	ATCGTAGTTCAGATTCAAGT	C	GGTTCAGTGATTATTATTAT	1
rps3	69	23	UUC->UUU	Phe->Phe	AGTTCAGATTCAAGTCGGTT	C	AGTGATTATTATTATGGTAA	0.984
rps3	92	31	UCA->UUA	Ser->Leu	TGATTATTATTATGGTAAAT	C	AGTGTATCAAGATGTCAATC	0.998
rps3	512	171	UCA->UUA	Ser->Leu	AAAGAAGAATCTTTCTAAAT	C	ACTTCGGGTCAGCGGGGCCT	0.986
rps3	713	238	UCG->UUG	Ser->Leu	GCGCCCCTCCTTGAATTATT	C	GGTCATGCAATATTTATTGA	0.996
rps3	890	297	UCG->UUG	Ser->Leu	CGCTTTTTTTGTAGAAAGCT	C	GACCAGCGAGAAAAAGTGTT	0.972
rps3	1031	344	CCA->CUA	Pro->Leu	CGGTGCTACCTTTTTCTTTC	C	AAGGGATGGGGTTGGGGTGT	0.999
rps3	1364	455	CCG->CUG	Pro->Leu	TGTTTATCAAAGTGCTTCTC	C	GATTGCTCAAGACATCTCTT	1
rps3	1502	501	UCA->UUA	Ser->Leu	TATATGTTGTTCAGGTCGAT	C	AGAAGGCGCAGAAATAGCTA	1
rps3	1555	519	CGU->UGU	Arg->Cys	GAAAGTATGGAAAAACATCT	C	GTAATGTATTTAACCAGAAA	0.997
rps3	1588	530	CCU->UCU	Pro->Ser	ACCAGAAAATAGATTATGCT	C	CTGCGGAAGTATCTACTCGT	0.998
rps3	1619	540	UCA->UUA	Ser->Leu	ATCTACTCGTTACGGAATCT	C	AGGTGTCAAAGTGTGGATTT	1
rps4	61	21	CGG->UGG	Arg->Trp	GTCTACTTTCAGTAAATGTT	C	GGAACAGAGAACTTACAATA	0.999
rps4	145	49	CCG->UCG	Pro->Ser	CTATTAAGAGAAAGATTTAT	C	CGAGAGTAAATCTGAACAGT	0.945
rps4	176	59	UCA->UUA	Ser->Leu	TCTGAACAGTTACATCCAAT	C	ACAAACTACACGAAAGTTGT	0.979
rps4	205	69	CAU->UAU	His->Tyr	CACGAAAGTTGTCTCTTTTT	C	ATGGGGATTTACCCATCACA	0.986
rps4	274	92	CAU->UAU	His->Tyr	CATATATCCCTTTAATACTC	C	ATCCAGAAACAAGATTTGAC	0.908
rps4	302	101	CCG->CUG	Pro->Leu	AACAAGATTTGACGTTATTC	C	GGTTCGTCTCCATTTTCGTG	0.996
rps4	319	107	CGU->UGU	Arg->Cys	TTCCGGTTCGTCTCCATTTT	C	GTGAAACTATTCCTCAAGCA	0.984
rps4	347	116	CCG->CUG	Pro->Leu	TATTCCTCAAGCAAGGCAGC	C	GATAAGTCATCGAAAGGTTT	0.989
rps4	494	165	UCA->UUA	Ser->Leu	ATCTTTCTATATCGAAATAT	C	AGTTGAAAAAATCATAGGCA	0.998
rps4	926	309	UCG->UUG	Ser->Leu	CGAACTACCTACTCATTATT	C	GGAGGTGAATCATAGAACAC	0.995
rps4	937	313	CAU->UAU	His->Tyr	CTCATTATTCGGAGGTGAAT	C	ATAGAACACTAAAAGCTGTG	0.985
rps4	1022	341	CCU->CUU	Pro->Leu	ATTGAAAGATCTAAACCTTC	C	TCTTCGGAGCGAAAACGGAC	0.958
sdh4	29	10	UCG->UUG	Ser->Leu	GGCATTTTGTAGACGTGGTT	C	GGTTATTCCTATTTGTCTCT	1
sdh4	150	50	CCC->CCU	Pro->Pro	AAGAATGACTGCAGCTTTCC	C	ACTCCCTTTGATTATCATAT	0.989
sdh4	198	66	ACC->ACU	Thr->Thr	AGTCTCTTCCACTTTCCTAC	C	AAATCTCTCTTTATTCTGGC	0.961

## Sheet: TableS8
Table S8. The homologous DNA fragment in the E. chloranthoides mitochondrial genome.
Number	Mitochondrial genome	% Identity	Alignment Length	Mismatches	Gap Openings	Alignment start (chloroplast genome)	Alignment end (chloroplast genome)	Alignment start (mitochondrial genome)	Alignment end (mitochondrial genome)	E-value	Bit Score	MTPT annotation
MTPT1	Chromosome 1	96.809	94	3	0	68380	68473	98332	98239	1.37e-37	158	complete trnW-CCA
MTPT2	Chromosome 1	90.824	1068	79	6	34034	35089	156660	155600	0	1411	partial trnH-GUG;partial psbD;partial psbC
MTPT3	Chromosome 1	88.608	237	27	0	20979	21215	303186	303422	4.67e-77	289	partial trnH-GUG;partial rpoC2
MTPT4	Chromosome 1	87.651	332	30	7	35212	35534	155617	155288	3.48e-103	375	partial trnH-GUG;partial psbC
MTPT5	Chromosome 1	83.721	129	4	2	100457	100585	128736	128625	5.05e-22	106	partial trnH-GUG
	Chromosome 1	83.721	129	4	2	143603	143731	128625	128736	5.05e-22	106	partial trnH-GUG
MTPT6	Chromosome 2	93.151	73	5	0	54608	54680	153953	154025	8.13e-23	108	partial trnH-GUG;partial trnM-CAU
MTPT7	Chromosome 3	95.522	67	3	0	1	67	133699	133765	6.71e-23	108	partial trnH-GUG
MTPT8	Chromosome 3	93.421	76	5	0	39270	39345	130157	130082	1.44e-24	113	partial trnH-GUG;partial psaB
MTPT9	Chromosome 4	97.368	38	1	0	141003	141040	29611	29574	4.12e-10	65.8	partial trnH-GUG
	Chromosome 4	97.368	38	1	0	103148	103185	29574	29611	4.12e-10	65.8	partial trnH-GUG
MTPT10	Chromosome 5	95.238	84	3	1	111478	111560	59275	59192	2.41e-30	132	complete trnN-GUU
	Chromosome 5	95.238	84	3	1	132628	132710	59192	59275	2.41e-30	132	complete trnN-GUU
MTPT11	Chromosome 5	94.624	93	5	0	30906	30998	3450	3358	3.1e-34	145	complete trnD-GUC
MTPT12	Chromosome 5	81.609	87	4	7	88591	88665	42819	42733	3.21e-09	62.1	complete trnI-CAU
	Chromosome 5	81.609	87	4	7	155523	155597	42733	42819	3.21e-09	62.1	partial trnH-GUG;complete trnI-CAU

## Sheet: TableS9
Table S9. Using long-reads to validate potential repeat-mediated recombinations in mitogenome based on BLASTn.
The recombinant sequence represents four potential genomic paths inferred, where (1-1,1-2) and (2-1,2-2) respectively denote the major configuration and potential minor configuration. The major configuration was obtained by extending 1,000 bp on both ends based on the repetitive sequence, while the minor configuration involved artificially swapping extended 1,000 bp sequences to simulate recombin…
Path	Reads ID	Identity (%)	Alignment (bp)	Mismatch	Gap	reference_start	reference_end	Reads_start	Reads_end	e-valve	Score
R1_p1-1	bf0faf25-0117-4310-b531-113248e6a4a9	99.175	14295	41	59	1	14259	14892	29145	0	25673
R1_p1-1	68799351-d1e2-46b2-905d-c7d906d8bef4	99.174	14286	49	53	1	14259	17029	2786	0	25664
R1_p1-1	406fde5f-3b94-4363-a895-f3facf167cad	99.069	14286	42	64	1	14259	28325	14104	0	25560
R1_p1-1	fa058910-5040-4d82-865f-2f695bff3181	98.979	14299	37	73	3	14259	37262	23031	0	25495
R1_p1-1	1d6d9dfd-3fca-4f61-a8a0-fbcbbcf5c5df	98.999	14284	45	75	1	14259	27965	13755	0	25495
R1_p1-1	740ed28d-18e4-4a05-9758-dbe748b2928a	98.901	14292	58	71	1	14259	14530	305	0	25431
R1_p1-1	4ba7dbd4-773c-493d-9aff-f14f1dcc99ee	98.861	14310	59	87	1	14259	18672	4416	0	25427
R1_p1-1	841784c9-97f4-4933-8481-c65ef8a3ec45	98.84	14310	51	85	1	14259	26945	12700	0	25399
R1_p1-1	400bd73a-fc4e-4139-b921-e4e94952fd17	98.79	14294	63	84	1	14259	23227	37445	0	25337
R1_p1-1	da9efe52-b8bc-49a9-909b-495899407b9b	98.708	14314	61	96	1	14259	159	14403	0	25294
R1_p1-1	971ceb8f-10ab-4f74-99b6-d7cdd8918a87	98.657	14296	102	75	1	14259	9384	23626	0	25254
R1_p1-1	53991d41-ed95-4876-b654-1db859fe75fc	98.672	14303	71	86	1	14259	30306	16079	0	25250
R1_p1-1	47e29179-5664-4289-9477-499a1e330392	98.651	14310	68	90	1	14259	16383	2148	0	25241
R1_p1-1	bdc03c4c-59ea-42ac-823d-df6eaa6a06c3	98.637	14304	67	95	1	14259	14333	113	0	25217
R1_p1-1	495022b7-f81f-4822-a69f-3c1061763b50	98.603	14312	68	97	1	14259	4460	18692	0	25200
R1_p1-1	c6c20947-ff52-4546-bf78-525409439b6d	98.602	14303	73	104	1	14259	25263	39482	0	25187
R1_p1-1	a6dcc7d8-4683-4cfd-8306-7bd4ce4a52fd	98.547	14315	74	100	1	14259	17590	3354	0	25159
R1_p1-1	3c20270e-1bed-4a13-beb8-0174ca9b2369	98.518	14301	83	102	1	14259	19453	33666	0	25115
R1_p1-1	0914ab49-d688-46b6-9f24-565e208687d7	98.484	14314	85	102	1	14259	18619	4383	0	25110
R1_p1-1	049e27ac-5e60-4116-ac83-76e2695f13f4	98.47	14315	86	101	1	14259	17713	31950	0	25098
R1_p1-1	47449bcf-e114-408d-8f69-8198d361405e	98.476	14305	79	100	1	14259	5506	19717	0	25080
R1_p1-1	ed165c58-2eaf-456b-937b-ec6b603e550b	98.495	14282	77	96	1	14259	1495	15661	0	25056
R1_p1-1	2ed0e62a-8f77-4187-bd5d-50944a52db0f	98.413	14300	86	107	1	14257	22040	7839	0	25019
R1_p1-1	8dbd4b9f-b25e-4584-a718-b6d2fabb8136	98.364	14307	95	100	1	14259	19432	5217	0	24995
R1_p1-1	a2348c65-1661-4ed3-ad2e-7e14c8aeb88e	98.315	14301	90	111	1	14259	24105	9914	0	24934
R1_p1-1	f077334e-9946-40bb-b612-801df648e0cd	98.308	14303	79	120	1	14259	16206	2023	0	24921
R1_p1-1	b3abfe4c-6d29-4412-885f-24a29ea0a7e4	98.246	14309	107	114	1	14259	8463	22677	0	24901
R1_p1-1	da1a536c-6b29-4672-8c54-f75c90f634c2	98.199	14322	87	133	1	14259	21200	6987	0	24860
R1_p1-1	ee084ac9-e489-4790-8a68-8b91572fa109	98.19	14311	106	120	12	14259	19228	5008	0	24851
R1_p1-1	8d950ec0-bfa2-4321-acec-6150088cb5f0	97.898	14317	118	138	1	14259	22860	8669	0	24602
R1_p1-1	287393ff-4047-4ceb-895b-b857a4ea4cf2	97.73	14319	133	151	4	14259	14326	28515	0	24465
R1_p1-1	cd151f82-9b63-468e-b1a6-a3d205846028	97.724	14321	123	150	1	14259	27867	13688	0	24452
R1_p1-1	fe0883cd-eb05-4a85-ba90-9fe6566cb999	97.439	14331	173	152	1	14259	16484	2276	0	24253
R1_p1-1	c0a1e5e5-0803-48b2-a7a9-1792aa7a576e	97.519	14308	122	160	1	14259	19128	5005	0	24240
R1_p1-1	f334ce4b-0d22-4dbc-a5fa-cb237eee3cf3	96.818	14363	170	214	1	14259	24606	38785	0	23726
R1_p1-2	7013630f-23d8-4300-ad01-5ac35fa994c7	99.188	14283	32	60	1	14259	11289	25511	0	25656
R1_p1-2	8f2a53ed-91e5-4d2c-a16e-6646bed94e4a	99.125	14282	39	56	1	14259	23402	9184	0	25603
R1_p1-2	f1959bc9-6872-4b8d-bab4-ca86bfcdfeee	99.049	14294	50	71	1	14259	20248	34490	0	25564
R1_p1-2	6710e4ea-33be-4224-81d5-954e1b18c88c	99.02	14293	53	65	1	14259	19109	33348	0	25538
R1_p1-2	6fb92ad7-681a-4790-adf6-d3684b401f2a	99.007	14296	47	66	1	14259	17546	31783	0	25525
R1_p1-2	04eb0ebb-1cb6-4d7e-9daa-1cefd7882e5e	98.978	14291	50	79	1	14259	17843	3617	0	25494
R1_p1-2	d1f6886c-90c6-455f-83e9-d666de7ef018	98.958	14299	47	76	1	14259	14953	717	0	25486
R1_p1-2	49dd5ca7-068d-4fc1-8d21-a4bfea19c0c8	98.922	14285	64	66	1	14259	39959	25739	0	25444
R1_p1-2	2f12b365-318a-48a8-a421-2ec9bd38b538	98.839	14297	51	78	1	14259	36392	22173	0	25375
R1_p1-2	2d78f20e-7f8f-42e2-9692-0930d3330464	98.777	14309	58	91	3	14259	34051	19808	0	25346
R1_p1-2	c1e7ccab-1b5b-4bd0-ba6d-5472976c1bb0	98.726	14283	65	90	4	14259	25812	11620	0	25259
R1_p1-2	7797776a-9f52-43d3-b723-c0cc3d69aabd	98.698	14287	67	89	1	14259	19923	5728	0	25242
R1_p1-2	7aa27053-367f-462c-ba8f-d337cdc73417	98.65	14300	81	93	1	14259	16917	2689	0	25235
R1_p1-2	2d679d51-7379-44d4-8c4c-1f8d02d6f4cf	98.594	14296	75	101	1	14259	29810	15604	0	25170
R1_p1-2	7015afc9-442f-482c-870b-11ac3bb56108	98.574	14304	53	100	1	14259	12708	26905	0	25145
R1_p1-2	16042898-e8ae-43a7-8d9a-cc3e036fe147	98.539	14310	55	97	1	14259	166	14372	0	25126
R1_p1-2	f7305b45-7aac-4a9c-8f17-28e3fe190f91	98.505	14312	82	106	4	14259	20514	6279	0	25122
R1_p1-2	ee148194-79b2-4c98-9839-b637c5d57feb	98.544	14290	74	106	1	14259	22683	8497	0	25113
R1_p1-2	7e29f92a-4059-4c57-8ef5-a24d3d4be611	98.156	14318	105	109	1	14259	5866	20083	0	24831
R1_p1-2	7b2f48e9-003c-4f56-ba97-be54ff451012	98.101	14326	99	127	1	14259	16297	2078	0	24788
R1_p1-2	192b0792-007e-4c48-bcb2-53bd4ba67245	98.024	14320	129	119	1	14259	14230	4	0	24735
R1_p1-2	76be385b-6590-4df3-8da2-475f825296b6	97.754	14336	127	160	1	14259	20183	34400	0	24509
R1_p1-2	9867224d-9665-46d5-9762-e2e347a67948	97.693	14347	120	164	1	14259	9	14232	0	24465
R1_p1-2	303fb85f-617c-4e22-aa26-6940f56ff4b9	97.433	14337	161	152	1	14259	14659	452	0	24245
R1_p1-2	ec4b80d6-7f8f-4580-a1d1-2b34ff4a82d3	97.261	14314	158	158	1	14251	3587	17729	0	24046
R1_p1-2	c493c0bc-4b49-4b31-aef2-245e6ef2f43c	96.179	14393	220	251	1	14259	17953	32149	0	23228
R1_p1-2	cb89b7d2-8ed6-4ddc-b2d9-823f3180d545	96.23	14349	240	222	1	14259	20616	6479	0	23222
R1_p1-2	c1767dfc-9e4a-4b91-8f0f-3de67f00d5c4	94.619	14383	357	326	1	14259	44419	30330	0	21887
R1_p2-1	4fb216f2-4ce8-4d33-8ba5-9980b831d4d0	99.265	14282	24	68	4	14259	18624	32850	0	25717
R1_p2-1	fdf38036-73d4-4e79-b67a-d25c906d406d	99.181	14279	53	53	1	14259	3464	17698	0	25662
R1_p2-1	4d0abfc9-9c03-458b-963e-e095e2192dd0	99.111	14280	38	65	1	14248	1541	15763	0	25584
R1_p2-1	26bcf02e-c0e0-4619-b5e0-3b40b2a0a0ed	99.083	14293	40	77	1	14259	4166	18401	0	25584
R1_p2-1	653c8b0e-d003-4dbb-a1f4-aa26624de6d0	98.992	14289	55	61	1	14259	10254	24483	0	25507
R1_p2-1	ddef4255-2828-405a-bdcf-8b8f7fe11742	98.951	14303	65	61	1	14259	7224	21485	0	25503
R1_p2-1	fe1f415c-da70-408d-88b1-089a56740019	98.881	14296	54	82	1	14259	39813	25587	0	25416
R1_p2-1	4041ace3-f46c-4bec-ae42-856129a95226	98.79	14297	67	81	1	14259	6871	21099	0	25346
R1_p2-1	50dec7b4-f540-4db2-ae41-d40f442a9dee	98.762	14296	79	75	1	14259	22288	36522	0	25329
R1_p2-1	4627aed3-6a88-4c84-bc86-b72d8d8eea5f	98.783	14294	60	77	1	14259	27903	13689	0	25327
R1_p2-1	56c15ffc-8f50-479f-9ee1-2ad8f0b42edb	98.673	14317	51	99	1	14259	7445	21680	0	25257
R1_p2-1	b0a5a517-676d-4346-82cb-bddabdecd62f	98.637	14311	76	96	1	14259	393	14636	0	25237
R1_p2-1	70d0ea14-62d7-45a6-b033-d80162fb32b2	98.65	14298	78	88	1	14259	38833	24612	0	25228
R1_p2-1	f67505ff-046c-4511-b392-45b0e5df49f0	98.594	14299	71	96	1	14259	18992	4784	0	25172
R1_p2-1	23b8bc32-387d-4e2c-a718-db3465ee5995	98.573	14295	84	94	1	14259	2491	16701	0	25158
R1_p2-1	0286b7a8-3e31-4a8b-99e3-a76ae9af87a7	98.538	14300	87	102	1	14259	9113	23331	0	25137
R1_p2-1	5499d040-9b39-4e96-93f8-0004c990858b	98.558	14288	84	88	1	14259	4440	18634	0	25132
R1_p2-1	852d1216-446c-4ffd-8448-967f0e3efc35	98.504	14301	89	94	4	14259	5627	19847	0	25108
R1_p2-1	bce8007c-f557-40c3-81be-5b0390310dda	98.426	14297	106	88	1	14259	20422	6207	0	25045
R1_p2-1	3d62c7f6-d08a-4d53-b648-6f0cfe639aba	98.44	14296	86	96	1	14259	18679	4484	0	25037
R1_p2-1	523adf63-ed76-405f-b5e2-88a061cf20f9	98.225	14311	102	125	1	14259	10853	25063	0	24881
R1_p2-1	3256a050-4f50-4ac9-8844-e7e2198a9777	98.191	14318	108	119	1	14259	2669	16894	0	24866
R1_p2-1	6e7f8b89-a03e-46f9-be2c-d67b36a66154	98.202	14293	88	122	1	14259	65394	51237	0	24814
R1_p2-1	15a79a9d-17a0-405b-a756-54cfd363f9dc	98.152	14287	93	132	5	14259	6883	21030	0	24762
R1_p2-1	f50590af-c1d2-43be-95dc-824b8a611c8b	97.82	14311	118	127	1	14259	7109	21277	0	24520
R1_p2-1	17c376f4-1dcc-4bf1-b88e-b23d9e5fac01	97.647	14322	133	138	3	14259	19332	5150	0	24393
R1_p2-1	83770250-77f9-4c9c-8201-360aa3402397	96.875	14336	192	190	1	14257	13977	28135	0	23756
R1_p2-1	3d8d0d23-c268-48ac-b23d-d963d3cc1b89	96.775	14356	169	208	1	14259	19310	5152	0	23675
R1_p2-2	574beabd-5f3c-4f51-b952-38fbcad622e1	99.069	14292	48	66	1	14259	15883	1644	0	25577
R1_p2-2	f1efb143-1b19-45b1-b462-cc11c0c9e624	98.993	14295	48	73	1	14259	25305	11071	0	25512
R1_p2-2	a359241d-1b9a-4959-8f26-09a775455aa8	98.859	14291	61	71	1	14259	9822	24042	0	25394
R1_p2-2	1156c2d1-73a0-44f4-8e0f-6dc423c49861	98.811	14292	69	76	4	14259	17334	31560	0	25357
R1_p2-2	16e95f7a-f453-48ec-9a84-a2e49f71b4b0	98.824	14289	53	86	1	14259	24174	9971	0	25350
R1_p2-2	cd98b184-737b-4701-a371-c59e9f381417	98.736	14316	62	92	1	14259	15807	30060	0	25324
R1_p2-2	a8284296-ed5d-442c-ab6e-8113eb18d518	98.728	14308	58	94	1	14259	535	14767	0	25300
R1_p2-2	1a912fde-5a47-437a-84b1-c8f6920c5d26	98.727	14300	66	94	1	14259	22528	36752	0	25292
R1_p2-2	47596ae5-ccf3-4d7f-a506-3901ac2b8b4d	98.694	14314	60	91	1	14259	6537	20778	0	25279
R1_p2-2	58144060-5386-4bd9-a9eb-96e22754c488	98.685	14293	62	90	1	14259	14645	445	0	25237
R1_p2-2	f3f388b7-417a-4490-9c04-fb56f4993b41	98.595	14306	73	99	1	14259	3053	17277	0	25187
R1_p2-2	e3b74f09-1059-4b43-ba1b-5456a6deefc7	98.545	14299	80	101	1	14259	23008	8798	0	25135
R1_p2-2	c0823f76-356f-45cb-8769-84a368990a5b	98.497	14304	72	112	1	14259	1510	15715	0	25091
R1_p2-2	6d6bcb4e-4e87-42a2-ba97-a4f0b46c9702	98.414	14310	92	92	4	14259	40391	26163	0	25043
R1_p2-2	e6b5aafe-4303-42ba-bcea-176356a07f57	98.413	14306	92	97	1	14259	10736	24953	0	25036
R1_p2-2	23fca18c-b8b5-415e-93d6-fb1f2bf87dd8	98.412	14294	89	111	1	14259	24932	10742	0	25012
R1_p2-2	83a6d2cd-8fa9-4ba0-a401-cdfb6015365e	98.363	14297	93	107	1	14259	27381	13188	0	24975
R1_p2-2	a0b74f51-0c9a-4ba5-95d2-171e3b0fca8e	98.322	14306	99	104	1	14259	2795	17006	0	24958
R1_p2-2	eb645e68-2207-4000-86d4-2980c9efcde2	98.303	14317	95	115	1	14259	716	14942	0	24956
R1_p2-2	7ccb780d-85f4-4d37-93bb-2cc42f36b698	98.143	14327	111	120	1	14259	4064	18303	0	24840
R1_p2-2	4764d919-2925-403c-9f4d-cd14db3adff9	98.093	14314	102	132	1	14259	24422	10225	0	24762
R1_p2-2	62171428-0dad-45ed-87ae-daf4fee35eeb	97.842	14319	136	135	1	14259	7637	21842	0	24570
R1_p2-2	cdf6dbf0-03c1-4acb-9260-eb6210ff09cc	97.691	14335	99	166	1	14259	9475	23653	0	24424
R1_p2-2	2b8a53e1-4873-4225-b083-0ac2eeb0aba6	97.439	14331	157	176	4	14259	25352	11157	0	24238
R1_p2-2	d0b0283b-f276-47a9-bfbf-b24fac8ac687	97.353	14318	120	169	4	14259	14385	265	0	24101
R1_p2-2	23367b2b-b339-465e-80bb-d0d8024a6592	97.196	14371	157	201	1	14259	22906	8670	0	24079
R1_p2-2	f5f41bdc-2c10-4f40-a6ab-30a8b51cb549	96.567	14359	221	207	1	14259	6984	21170	0	23534
R1_p2-2	e18504b7-4ca7-4a25-a9d9-7107496d01a9	96.342	14299	200	217	1	14211	33827	47890	0	23209
R1_p2-2	56a4e626-28e6-479e-a60b-e11373388208	95.955	14338	197	259	1	14259	15762	1729	0	22910
R1_p2-2	74604b99-2c2e-4a42-8a94-616b9a7b04f4	95.76	14364	282	239	4	14259	28300	14156	0	22849
R1_p2-2	ea97fe0f-5438-4e5c-a98d-f6c316bb6872	91.569	14411	581	474	89	14259	14624	608	0	19296
R1_p2-2	1c3025ec-4a19-496b-988e-a5de93f8e26e	91.523	14427	581	478	1	14259	39575	25623	0	19274
R2_p1-1	20e5a3e3-760b-4830-84d2-3f689b43c677	99.241	7511	26	29	1	7500	17141	9651	0	13525
R2_p1-1	8f2a53ed-91e5-4d2c-a16e-6646bed94e4a	99.254	7505	18	29	1	7500	38667	31196	0	13514
R2_p1-1	478bc1cf-5325-46f8-becf-f7370d1f5095	99.11	7524	23	36	1	7500	25492	17989	0	13483
R2_p1-1	bba0d1ba-6509-4a43-a773-f62e331538f4	99.095	7512	26	36	1	7500	8001	520	0	13457
R2_p1-1	b6a5dc1d-445f-44f4-9276-6207127da3fa	99.082	7513	27	36	1	7500	15993	8510	0	13453
R2_p1-1	a8ff1f5a-cd83-467c-84eb-fb0857aaa4f6	99.043	7521	21	40	1	7500	10832	3342	0	13442
R2_p1-1	0c58f05d-cb1d-4738-8d6e-82e0c74eb165	99.015	7515	31	35	1	7500	10949	3463	0	13428
R2_p1-1	95c72cee-b0ff-429b-92ae-2c41591c8936	98.962	7518	33	35	1	7500	12992	5502	0	13409
R2_p1-1	9750c7bc-52ea-4561-b52c-a65f9caf85d0	98.975	7513	28	41	1	7500	37530	30054	0	13402
R2_p1-1	5182c79d-d5c1-42b6-8b35-0cbc4612a40e	98.87	7520	36	43	1	7500	2778	10268	0	13370
R2_p1-1	44629164-5491-48f8-ae0f-8c4884fce12a	98.896	7515	31	36	1	7500	1172	8649	0	13370
R2_p1-1	b5b890e5-9d2a-4bb6-8f16-103aa109f094	98.818	7528	37	42	1	7500	7680	177	0	13361
R2_p1-1	f798d2c7-5dbf-4fbe-b021-c1489ae72e66	98.895	7513	23	46	1	7487	8222	15700	0	13359
R2_p1-1	c5d4c360-9db2-4547-be1f-80ea23e3a56e	98.83	7523	28	52	1	7500	14917	7432	0	13350
R2_p1-1	24c9bdc5-343d-4ed4-b284-a80cde12fdab	98.829	7516	41	37	1	7500	14543	7059	0	13348
R2_p1-1	09817e8f-369b-4d3b-9c39-50c0f356a693	98.83	7519	35	44	1	7500	8595	1111	0	13348
R2_p1-1	e01b42e2-6356-42f5-b540-defb433b41b2	98.829	7518	34	42	1	7500	822	8303	0	13346
R2_p1-1	b1e4b3e3-e51c-4691-913f-c559df6339b1	98.816	7519	29	46	1	7500	11734	4257	0	13337
R2_p1-1	4f0c137e-3671-4f7a-9f71-2ceeb8f6f4ca	98.79	7523	32	50	1	7500	9361	16847	0	13333
R2_p1-1	6fb92ad7-681a-4790-adf6-d3684b401f2a	98.738	7530	29	47	1	7500	2267	9760	0	13319
R2_p1-1	d673a2b4-f248-413c-b011-f0934a3603e7	98.711	7527	43	43	1	7500	3192	10691	0	13313
R2_p1-1	e3b74f09-1059-4b43-ba1b-5456a6deefc7	98.736	7515	46	35	1	7500	38282	30802	0	13306
R2_p1-1	30fbf610-2db8-404a-9181-6925de5abb6a	98.762	7514	32	38	1	7500	2134	9600	0	13304
R2_p1-1	3832bc4e-8060-4f5f-8069-b9f991a59995	98.672	7528	39	45	1	7500	6097	13591	0	13291
R2_p1-1	016da028-9c41-4ce1-b669-386deffabdd7	98.644	7523	49	47	1	7500	24044	31536	0	13278
R2_p1-1	4fdd19c0-16ba-481b-934d-9eab9039de58	98.658	7525	30	52	1	7500	574	8052	0	13271
R2_p1-1	040dac90-2721-48f5-8bbb-419a934cf466	98.617	7521	38	51	1	7500	4600	12075	0	13252
R2_p1-1	12786a5b-daf1-4493-8228-bbc5dade8766	98.616	7515	45	53	1	7500	24185	31655	0	13247
R2_p1-1	9c6075b3-3c93-47e1-bbac-9722157db8b9	98.591	7522	44	46	1	7500	8964	16445	0	13247
R2_p1-1	bd5897d3-7133-494c-a238-54f98e93a015	98.524	7522	50	51	2	7500	37	7520	0	13219
R2_p1-1	af99f828-76f5-4ef2-af34-17b721ad1473	98.511	7523	48	53	1	7500	8275	794	0	13213
R2_p1-1	ce711d94-c724-4f09-8dc7-300943b54386	98.498	7523	35	54	1	7500	45735	38268	0	13195
R2_p1-1	26bacdb3-c601-4402-a39d-7661e040168e	98.472	7525	41	58	1	7500	1933	9408	0	13191
R2_p1-1	60896146-4b50-4590-9741-a75545acfb9e	98.366	7528	51	57	1	7500	13528	6045	0	13154
R2_p1-1	10374602-85c1-43ee-bba8-c577d2718620	98.338	7522	52	62	1	7500	15312	7842	0	13130
R2_p1-1	bb6d4e6d-6d7b-40ba-88e8-2474ee35c17f	98.286	7528	60	56	1	7500	8208	15694	0	13123
R2_p1-1	619a7400-2425-4f9b-b8a3-4db123f5f6ff	98.246	7524	54	61	1	7500	10353	17822	0	13092
R2_p1-1	bd231f19-56d1-4286-9ab6-6946f8c7651c	98.283	7514	46	55	1	7500	28551	21107	0	13084
R2_p1-1	7fea5e3e-a886-4cf9-92ef-a77611af9c78	98.218	7520	63	56	1	7500	14431	6963	0	13079
R2_p1-1	3ccacf49-1dc9-4750-bc41-84c4b31b9b5d	98.103	7538	45	72	1	7500	13322	5845	0	13038
R2_p1-1	4e6c7ab7-4b24-48da-80ae-043d059cb8d9	98.04	7550	50	71	1	7500	28008	20507	0	13032
R2_p1-1	cc941739-0df8-4c84-b68f-e6587c449ac4	98.073	7523	59	60	1	7500	24356	31815	0	13010
R2_p1-1	74b77b3b-167f-49a8-b315-3c2239e88cdf	97.982	7532	53	76	1	7500	11054	3590	0	12975
R2_p1-1	099126a7-a1e2-49b7-8cdb-c0b8aa1b9c98	97.992	7520	54	67	1	7500	14378	21820	0	12960
R2_p1-1	e86d76c7-e27f-416b-a864-75edfd824cc5	97.879	7543	59	81	1	7500	38323	45807	0	12949
R2_p1-1	8f10c310-c2d1-410c-9ab0-d1f6ccb13eb6	97.641	7544	61	82	1	7500	10030	17500	0	12837
R2_p1-1	b03668cf-7b33-491e-a779-07f7dd8ab435	97.397	7531	90	87	1	7500	619	8074	0	12724
R2_p1-1	2b8a53e1-4873-4225-b083-0ac2eeb0aba6	97.241	7540	89	97	1	7500	40579	33119	0	12661
R2_p1-1	d16477ff-6f04-4f92-a294-0487cf95fe25	97.11	7542	81	96	1	7500	1549	8995	0	12593
R2_p1-1	1402c157-0fe8-4a82-b057-234032a59be5	96.907	7566	92	116	1	7500	8154	15643	0	12545
R2_p1-1	fa421764-d782-42f0-9ea2-acb24e02469f	96.955	7554	80	107	1	7500	13876	6419	0	12538
R2_p1-1	ffd02fc7-34b0-43e6-ae1c-4be3489e93ed	96.73	7553	97	118	1	7500	13043	5588	0	12441
R2_p1-1	b3d221b9-38f8-455b-96d1-ef450715db82	96.268	7475	129	114	1	7429	11610	4240	0	12120
R2_p1-1	22ed92d7-d412-49d7-9258-1333ec0dd56e	94.001	7601	220	182	1	7500	7580	115	0	11293
R2_p1-1	9de11aa2-a7fb-4527-88d6-d60175aeeda1	93.532	7607	231	191	1	7500	23906	31358	0	11081
R2_p1-1	ea97fe0f-5438-4e5c-a98d-f6c316bb6872	93.195	7627	242	227	1	7500	29867	22391	0	10953
R2_p1-1	af15a6bc-4050-4901-a7b2-08636a4dc928	93.236	7584	256	199	1	7500	17840	10430	0	10925
R2_p1-2	7abca510-fe95-4dfc-bd7d-0be97267146c	99.374	7511	12	27	1	7500	2947	10433	0	13577
R2_p1-2	0087b137-beae-48d4-8e73-b1d23117d949	99.308	7516	18	29	1	7500	36239	28742	0	13561
R2_p1-2	c4c7864f-2e52-4f91-a6f0-0dfe661fe018	99.308	7511	15	31	1	7500	7976	492	0	13548
R2_p1-2	255e387f-b3dd-4891-8755-aaa3ccbe6141	99.268	7510	23	24	1	7500	9031	16518	0	13535
R2_p1-2	6c0dbb79-4287-4969-98cf-37ff9295af3f	99.241	7511	24	26	1	7500	4015	11503	0	13524
R2_p1-2	3afb1118-f5aa-4cce-a68c-32362deb747c	99.11	7524	18	41	1	7500	17163	9665	0	13477
R2_p1-2	be34c929-7213-4515-b812-c7d52b89a37a	99.109	7516	17	35	1	7500	11462	3981	0	13463
R2_p1-2	0c3b8577-326d-4957-9c10-e4a001799873	99.082	7514	28	31	1	7500	47667	55153	0	13455
R2_p1-2	98f608d9-fc0f-4511-944c-22421fad983d	99.094	7506	29	30	1	7500	37312	29840	0	13448
R2_p1-2	22b200c2-aa54-434b-b9ae-088122e51fa7	99.03	7525	20	41	1	7500	8623	16119	0	13442
R2_p1-2	cb36891d-5ac2-4c4d-93dc-16cee842ae2d	99.081	7508	24	35	1	7500	11122	3652	0	13441
R2_p1-2	a73d2904-f2bf-4dd1-bc2b-bf1705f71f7b	99.054	7509	32	35	1	7500	12347	4869	0	13437
R2_p1-2	96138d6f-ce17-4c52-8815-f8518a6ea8da	98.977	7524	26	41	1	7500	31383	23887	0	13420
R2_p1-2	8b8c1cb2-7c26-425d-9a59-f1ff8a04ac91	98.989	7519	25	39	1	7500	2872	10358	0	13417
R2_p1-2	3afa37f8-e8a4-45d4-90f3-edf0ac58428d	98.976	7521	26	37	1	7500	10961	3471	0	13415
R2_p1-2	84e99fd3-8fb3-4680-a877-0497df55f948	98.963	7524	21	36	1	7500	10355	2865	0	13409
R2_p1-2	a14113b7-e6f4-4bbb-aa2e-d4059631dae7	99.001	7510	24	35	3	7500	35483	28013	0	13405
R2_p1-2	556f1cae-66f2-456f-ae78-14f27583f9d8	98.975	7515	23	39	1	7500	40416	47891	0	13402
R2_p1-2	15877941-bcc8-41aa-9d11-f1e663df28a8	98.909	7519	38	42	1	7500	7826	333	0	13391
R2_p1-2	b1eaf10a-269e-4985-bd66-fcc202113292	98.857	7525	31	40	1	7500	22311	29805	0	13369
R2_p1-2	175daaf7-2801-4d3a-85a9-1a7edc492779	98.844	7528	31	45	1	7500	8801	1302	0	13369
R2_p1-2	53a17d05-49a4-48ca-9174-33bb946762e7	98.895	7510	33	42	1	7500	10618	3149	0	13363
R2_p1-2	d3db7dbc-7ae7-42e1-98e5-e187391c96a2	98.844	7524	27	46	1	7500	14591	7104	0	13357
R2_p1-2	428eede3-c3b9-4a8c-8b02-d3114fffab4a	98.817	7523	31	44	1	7500	17222	9735	0	13346
R2_p1-2	ac3b7edd-56f1-4c46-8034-13e235183d18	98.855	7511	32	40	1	7500	9207	16674	0	13345
R2_p1-2	c4296646-1fe9-4fb9-908b-7b2337ef6a1b	98.842	7510	28	44	1	7500	10874	18334	0	13332
R2_p1-2	591d867f-43d9-42ec-ae76-783554a814a7	98.775	7510	47	38	1	7500	19129	26603	0	13317
R2_p1-2	364d9fa4-6966-4f79-b111-4d8532b9a01b	98.737	7519	45	40	1	7500	9711	2224	0	13313
R2_p1-2	055caeb5-7183-468d-bc8c-ff37377a4d10	98.75	7517	40	47	1	7500	1851	9330	0	13311
R2_p1-2	62fb5d2e-7f29-4776-8ecd-751fe8cc6a25	98.75	7519	33	47	1	7500	28176	20700	0	13308
R2_p1-2	155359d1-ff61-4e32-a494-6949148918f5	98.723	7516	46	41	1	7500	12603	20084	0	13302
R2_p1-2	3abb92cf-d00e-46fe-b74e-4b155f5723ca	98.565	7526	39	49	1	7500	9206	1724	0	13236
R2_p1-2	0e8623e9-8788-4f7e-b17f-db90e58882da	98.591	7524	28	51	1	7500	2335	9804	0	13236
R2_p1-2	b2c176a7-ed55-45cc-9d12-ec361d259a0c	98.565	7526	35	50	1	7500	2987	10465	0	13232
R2_p1-2	4e51b8e0-c673-4c0a-aeba-403a8b345bc5	98.551	7525	40	46	1	7500	15710	23190	0	13228
R2_p1-2	1e140f34-8900-4547-83fb-46aa289b25bd	98.564	7521	38	57	1	7500	18369	10898	0	13226
R2_p1-2	1a0c85f3-dfc1-432b-a263-2744d69df34b	98.513	7533	38	51	1	7500	3526	11017	0	13223
R2_p1-2	075dd507-6e0a-4f88-89fc-a9cd9045b5dc	98.511	7523	44	54	1	7500	26951	34428	0	13210
R2_p1-2	ba9f592c-c04a-4fa6-bb90-239c22138ed6	98.448	7540	26	55	1	7500	22861	30349	0	13191
R2_p1-2	8a984d74-7513-4a51-b836-bfc57347d0db	98.434	7535	43	51	1	7500	12036	4542	0	13191
R2_p1-2	cf9467a3-f561-439e-b325-07a7f7dd8caf	98.418	7521	51	47	1	7500	8719	1246	0	13167
R2_p1-2	624d993b-19f4-4890-a1ad-8b9c55567c5c	98.379	7526	55	50	1	7500	30626	38110	0	13160
R2_p1-2	1cbdcbca-feed-4093-8520-46f9caae9ef4	98.315	7535	43	66	1	7500	209	7694	0	13134
R2_p1-2	20cbd31f-349b-4508-93ee-34af5c8f7d87	98.313	7530	50	56	1	7500	52701	45219	0	13130
R2_p1-2	97c07ecd-a8f7-478b-9a8f-87d9eccb781a	98.223	7539	49	57	1	7500	1037	8529	0	13101
R2_p1-2	2579629d-7dfc-4944-bd2a-dd3dd5759816	98.271	7517	52	52	3	7500	8180	723	0	13090
R2_p1-2	54d408ab-70f5-4ab8-a46f-bb085f1cc9b5	98.206	7525	42	68	1	7500	785	8241	0	13062
R2_p1-2	dd0c8da0-405f-4b52-b33e-38410b26d8e5	98.166	7524	42	69	1	7500	17673	10222	0	13042
R2_p1-2	543dbab3-38dc-4293-a645-b4f83edd5f5e	97.992	7519	71	57	1	7500	14479	21936	0	12975
R2_p1-2	69902370-45f5-4aaf-a374-3735a4440e03	97.931	7493	60	71	40	7500	4034	11463	0	12890
R2_p1-2	5952349e-e165-411f-b4e2-67ef2591f50a	97.797	7535	51	76	1	7500	29442	21988	0	12888
R2_p1-2	b3496d25-f3cd-4bcb-8561-de12a52bc183	97.707	7545	68	88	1	7500	11056	3572	0	12877
R2_p1-2	c113c20f-dbe4-4141-8454-7bf69b781800	97.411	7533	92	75	1	7500	15596	8134	0	12735
R2_p1-2	58c09fb6-7be9-4bef-a83b-fbb16c4ec162	97.384	7531	84	89	1	7500	2188	9636	0	12711
R2_p1-2	091d4a82-8b94-4122-95c8-602d4ae174c1	97.282	7541	87	93	1	7500	13704	6241	0	12682
R2_p1-2	a5e27967-af91-4b59-b371-98ead407d0d3	97.318	7531	83	86	1	7500	11980	4538	0	12678
R2_p1-2	69104e39-5c0f-4d7b-b1ea-b7f80d0b2790	97.125	7549	90	99	1	7500	21360	13890	0	12621
R2_p1-2	43b1b6bf-9174-4da1-9af1-6bf8f5ae8a73	96.976	7540	99	110	1	7500	2576	10026	0	12541
R2_p1-2	4ea00eb9-98ba-4f8e-84f1-9b74532f6847	96.486	7541	104	118	1	7500	8068	648	0	12309
R2_p1-2	93649ce6-7899-4ee5-86e4-9d14d3f615b4	96.048	7592	136	136	1	7500	6681	14200	0	12207
R2_p1-2	be7e7f5e-7713-4cd5-b3b4-2249413071da	95.505	7541	154	147	1	7500	15056	7660	0	11876
R2_p1-2	b4b64520-421e-4191-b12f-cb4b8c6ea638	95.304	7559	153	151	1	7500	18434	25849	0	11806
R2_p1-2	20be5d50-d781-45db-a9b1-70f29fcb7f11	93.295	7636	223	212	1	7500	15227	7745	0	10997
R2_p1-2	968f9549-f92f-49fe-874d-b8a6a88c7846	86.153	7684	501	427	1	7500	10824	18128	0	7775
R2_p2-1	a5ed0e01-636b-4679-90f0-0b3e924c940c	99.587	7503	11	15	1	7500	16934	9449	0	13666
R2_p2-1	86f33cea-3bd3-4b52-9b6d-d1316711cb8c	99.401	7507	11	26	1	7500	11092	18571	0	13583
R2_p2-1	783a1a7b-e5a5-45a0-96cc-e343810de545	99.334	7512	20	24	1	7500	11607	4114	0	13568
R2_p2-1	7d5ccfdd-072c-4d4b-8f3c-b10fb716c9b3	99.321	7512	16	30	1	7500	9875	2387	0	13557
R2_p2-1	0b5ee240-2fc9-46b8-9a39-afafb6835c44	99.242	7518	16	34	1	7500	24430	16936	0	13529
R2_p2-1	fc2f559e-a56c-45b5-9b9c-81b19c4bd617	99.202	7522	22	29	1	7500	9575	2070	0	13524
R2_p2-1	9061db8c-1d4f-40a9-9a44-76b57fb04d94	99.11	7525	22	38	1	7500	2423	9927	0	13483
R2_p2-1	a76682c8-7635-465f-b44b-d3f6f03f6c4d	99.109	7517	25	33	1	7500	4936	12427	0	13472
R2_p2-1	c9391336-fc76-40e4-bda9-24a24ae6f1b4	99.054	7509	26	36	1	7493	24608	32087	0	13431
R2_p2-1	0c963eef-bf87-4655-8c23-1b4b9819cce3	98.989	7521	28	36	1	7500	11614	19107	0	13424
R2_p2-1	fa16f6fa-f5c2-4977-8617-614bfc69875f	98.963	7520	21	41	1	7500	8616	16098	0	13402
R2_p2-1	d01f6b83-39cc-4025-802e-ad0855db5396	98.963	7520	20	45	1	7500	18922	26403	0	13402
R2_p2-1	7f33bf1a-271c-412c-a48a-b7a6c28c050c	98.897	7525	38	33	1	7500	26945	19441	0	13394
R2_p2-1	6167a7b3-9820-455e-91f1-67a4009b0759	98.922	7515	41	34	1	7500	2408	9897	0	13393
R2_p2-1	7b1fbe90-064b-466c-8197-c88783921d73	98.936	7516	30	41	1	7500	15448	7967	0	13391
R2_p2-1	544d61e5-2d9a-4787-8038-86a85e4a76bd	98.896	7519	30	43	1	7500	29492	22008	0	13376
R2_p2-1	60f06f0d-83ba-44e4-a6eb-588cf8132c3b	98.909	7516	27	39	1	7500	25592	18116	0	13374
R2_p2-1	63d3796a-17f5-48f4-b2e4-3ba21cb4528b	98.883	7517	29	43	1	7500	25992	33470	0	13365
R2_p2-1	3e818550-3bee-4bcb-a8b3-2c60445ba4f6	98.844	7523	34	38	1	7500	14851	7359	0	13361
R2_p2-1	0e5bb7ab-d176-4091-b609-13dd869fd014	98.842	7516	38	42	1	7500	22805	15323	0	13352
R2_p2-1	8cf24a56-dc40-40f5-b553-a7fa85be653b	98.869	7515	24	44	1	7500	60573	53105	0	13350
R2_p2-1	290d8424-83fb-4afa-b3b7-d01c02fbfb37	98.777	7521	39	37	1	7500	8625	1137	0	13330
R2_p2-1	1c376358-2546-43ba-96b8-94ba658c7e68	98.789	7517	34	43	1	7500	3430	10906	0	13324
R2_p2-1	7e8c7efc-acd7-46fb-935a-b58874a6be66	98.737	7524	35	45	1	7500	10235	2748	0	13313
R2_p2-1	7271d102-bb28-44a9-ac17-166e8c92c14f	98.645	7525	34	55	1	7500	8530	16011	0	13269
R2_p2-1	18568b41-bba0-45b1-b3ad-34105ba0c02b	98.873	7453	25	43	1	7426	27110	34530	0	13243
R2_p2-1	0918d9b9-42bc-4c4b-bf71-7aef4b8a3298	98.526	7529	48	46	1	7500	10833	3339	0	13230
R2_p2-1	3d8232f7-761a-4f59-bd52-b1ebcf141184	98.524	7522	47	49	1	7500	15009	7530	0	13217
R2_p2-1	9118ef7e-7da1-4f06-9ee9-89e74bc59768	98.418	7524	47	54	1	7500	9491	16966	0	13169
R2_p2-1	d1cc1ecc-9937-4ec5-8d5d-381f7f61a02a	98.353	7528	54	57	1	7500	3181	10666	0	13151
R2_p2-1	cb487d59-41f8-4e06-a71f-46e028814d0e	98.339	7525	43	56	1	7500	25008	32475	0	13128
R2_p2-1	e1c77ee5-84c9-4d4a-b64a-a83981732690	98.26	7528	57	64	1	7500	41262	33781	0	13108
R2_p2-1	168073bb-fad9-437a-bbee-af8c9a58869e	98.182	7537	66	59	1	7500	7662	15164	0	13093
R2_p2-1	bd961297-d69d-41aa-9a7f-f6e18a7610bd	98.218	7521	45	71	1	7500	23420	30872	0	13064
R2_p2-1	37f92587-920c-417a-b5b1-62b4cb617a02	98.179	7522	57	57	1	7500	6989	14452	0	13058
R2_p2-1	0fb3f4c8-a90f-461e-8bdb-cc30f9628b07	98.115	7535	57	68	1	7500	12782	20266	0	13049
R2_p2-1	71b52735-fb2d-4b85-a6ff-e93a24a2f269	98.126	7526	64	60	1	7500	21327	13853	0	13045
R2_p2-1	0607ac5b-c27e-4cb0-b1b9-21b7d943eb60	98.113	7524	60	63	1	7500	6521	13986	0	13032
R2_p2-1	cca1a7a8-3f17-4330-92cc-4bbd388dd8ba	98.008	7529	56	69	1	7500	8468	15931	0	12986
R2_p2-1	47e3c065-b266-4747-999d-483953a27f41	97.955	7532	75	56	1	7500	8101	617	0	12983
R2_p2-1	0102087c-0bcf-4ea8-9034-0d05437ea121	97.667	7545	72	80	1	7500	9296	1811	0	12863
R2_p2-1	289a9a40-807c-4e79-bcbd-08b6662e0710	97.547	7543	83	88	1	7500	18286	10803	0	12811
R2_p2-1	20455bd9-b411-4f3a-8ed3-aec03b7c2edf	97.496	7549	78	84	1	7500	24019	16533	0	12791
R2_p2-1	0f49dfff-1719-420e-900d-ba950e6e8bb6	97.452	7534	77	87	1	7500	6801	14253	0	12743
R2_p2-1	430a3442-f8cc-4642-afd6-fecfb7a1d983	96.999	7532	80	101	1	7500	17741	25158	0	12523
R2_p2-1	9c0f5671-9c0f-48ba-b862-5f12ec6fde27	96.761	7534	96	104	1	7496	20289	12866	0	12425
R2_p2-1	f30642d2-d6c3-4090-ad32-d12357564175	95.794	7560	139	133	1	7500	8727	16167	0	12033
R2_p2-1	6ed513a5-92e2-489e-9221-8f7c8f70a830	93.477	7588	191	227	1	7500	22195	29566	0	10990
R2_p2-1	fbb0f593-c65d-4bda-846a-625a086fa05b	91.772	7608	305	246	1	7490	34318	26914	0	10285
R2_p2-1	2cc56bd2-6111-4abf-98c8-4f06c7fd3e1c	91.612	7654	271	275	1	7500	17832	10396	0	10235
R2_p2-2	3b8adec1-ca01-40d5-86a2-ee85a655f1f0	99.348	7513	22	23	1	7500	23488	15990	0	13577
R2_p2-2	7158ae9c-53a7-4fa1-93a0-95639e50e34e	99.188	7516	21	38	1	7500	3647	11138	0	13505
R2_p2-2	d118cbd5-3f76-4645-8768-85c68fb6b9da	99.175	7516	17	33	1	7500	17599	10113	0	13494
R2_p2-2	f1efb143-1b19-45b1-b462-cc11c0c9e624	99.082	7517	31	35	1	7500	40553	33058	0	13465
R2_p2-2	1156c2d1-73a0-44f4-8e0f-6dc423c49861	99.055	7512	31	34	1	7500	2043	9526	0	13442
R2_p2-2	8ffbb8f2-e8e8-462b-9c07-12822c75364b	99.002	7517	32	38	1	7500	12178	19668	0	13426
R2_p2-2	f1959bc9-6872-4b8d-bab4-ca86bfcdfeee	99.015	7513	25	39	1	7500	4970	12446	0	13418
R2_p2-2	d1f6886c-90c6-455f-83e9-d666de7ef018	98.989	7514	31	39	1	7500	30228	22746	0	13413
R2_p2-2	a8bf15e9-55e0-4f9b-a0dc-6ec56825a098	98.975	7513	22	41	1	7500	40750	48220	0	13396
R2_p2-2	7a1c9d3e-5aab-4179-b309-c0fd989d4f5a	98.922	7517	38	38	1	7500	40866	48356	0	13393
R2_p2-2	8e027fe7-379d-4ce7-8e4b-7a928d96f15d	98.948	7512	34	36	1	7500	17025	9547	0	13393
R2_p2-2	027858db-6724-4366-bc33-91000af1e2e4	98.922	7516	38	35	1	7500	14688	7200	0	13391
R2_p2-2	722849e8-7240-4c82-97bf-6511d494c024	98.87	7519	34	34	1	7500	10558	3072	0	13367
R2_p2-2	feff6289-abbf-4fea-b5fc-b429d23c0de9	98.882	7514	32	43	1	7500	26623	19148	0	13363
R2_p2-2	6710e4ea-33be-4224-81d5-954e1b18c88c	98.869	7515	29	40	1	7500	3851	11324	0	13356
R2_p2-2	1a912fde-5a47-437a-84b1-c8f6920c5d26	98.843	7518	35	44	1	7500	7256	14739	0	13354
R2_p2-2	4a2784e9-dfce-4178-ac14-eb476624f3e2	98.804	7524	38	42	1	7500	6432	13927	0	13348
R2_p2-2	579441cd-cf09-4a1d-829f-85a8c60d47d5	98.736	7517	35	48	1	7500	15483	8010	0	13300
R2_p2-2	76599e5f-ff18-4121-b2b0-7206b893988f	98.685	7528	37	43	1	7500	9997	17490	0	13296
R2_p2-2	168c25ef-5020-4df6-91f1-ab6a4f3ac80b	98.683	7518	33	48	1	7500	27765	35234	0	13274
R2_p2-2	1861cba0-8fc1-4aba-9f62-e3b024ac05d5	98.63	7516	41	45	1	7500	21047	28516	0	13252
R2_p2-2	4fab5355-017a-48a8-bfb9-4b205ffd7774	98.525	7523	55	47	1	7500	11908	19397	0	13226
R2_p2-2	e87173c7-5dc7-4a05-9585-e8165cd56e7a	98.473	7529	42	53	1	7500	16832	9348	0	13199
R2_p2-2	8eb5240d-bd95-48f0-8bbe-d4eb3b62fe32	98.443	7515	49	60	1	7500	23451	30912	0	13167
R2_p2-2	cd98b184-737b-4701-a371-c59e9f381417	98.339	7524	59	58	1	7500	522	8003	0	13141
R2_p2-2	6c29b109-ca71-4b4a-b35f-10828816ebcf	98.339	7527	49	53	1	7500	39395	46872	0	13138
R2_p2-2	cee18d8d-4d95-440a-86c8-34eb3018849b	98.258	7521	53	56	1	7500	12572	20035	0	13092
R2_p2-2	b0c64944-cfac-4175-8a99-b943a77b1b07	98.195	7534	49	68	1	7500	9587	17067	0	13079
R2_p2-2	192b0792-007e-4c48-bcb2-53bd4ba67245	98.18	7526	55	60	1	7500	29492	22023	0	13064
R2_p2-2	8b8349b1-10c5-4e73-b590-b3f05aa19932	98.1	7526	54	71	1	7500	14511	7049	0	13023
R2_p2-2	dcddc426-5159-4815-b314-0fef7d0929c0	98.008	7529	57	71	1	7500	16911	9447	0	12986
R2_p2-2	5cae671b-3859-4540-85f8-ec8296cea7e5	97.838	7540	60	84	1	7500	10093	2617	0	12925
R2_p2-2	a7ed5557-f84c-48c5-9ea0-0e3812ee5d42	97.586	7539	77	80	1	7500	11063	18535	0	12816
R2_p2-2	234a53ac-b84e-4ff1-a7d5-2364ee745e4f	97.33	7528	99	71	1	7500	19241	11788	0	12694
R2_p2-2	e18504b7-4ca7-4a25-a9d9-7107496d01a9	97.026	7532	99	95	1	7500	18662	26100	0	12552
R2_p2-2	76be385b-6590-4df3-8da2-475f825296b6	96.914	7551	97	105	1	7500	4913	12378	0	12528
R2_p2-2	b3aa7af6-b9ac-41c3-baec-644ae1d5dc55	96.599	7556	114	112	1	7500	16648	24116	0	12397
R2_p2-2	b87e84da-2594-49bb-92ba-259b5bc9f718	96.534	7560	109	109	1	7500	12210	4744	0	12368
R2_p2-2	09d601dc-51a4-4f98-81a4-3fbacf1b0a7e	95.568	7558	145	140	1	7500	13515	20940	0	11926
R2_p2-2	854c32ae-ec3a-4cfe-9f39-182c816cc1ad	95.554	7557	144	160	1	7500	25691	18270	0	11917
R2_p2-2	cb89b7d2-8ed6-4ddc-b2d9-823f3180d545	95.516	7561	154	143	1	7500	35786	28350	0	11913
R2_p2-2	c55245ba-bf02-47aa-bdab-679ca7f54f46	95.614	7546	120	133	1	7500	18926	26306	0	11906
R2_p2-2	dd7a2333-8b85-40ff-bb55-21a21c62932c	95.309	7546	142	150	1	7500	26583	19204	0	11779
R2_p2-2	c493c0bc-4b49-4b31-aef2-245e6ef2f43c	94.947	7560	171	168	1	7494	2784	10198	0	11649
R2_p2-2	52ada38d-86b2-449d-8991-0dbb4d87b259	94.174	7587	182	197	3	7500	18908	11493	0	11322
R2_p2-2	1c3025ec-4a19-496b-988e-a5de93f8e26e	90.267	7552	329	302	44	7500	54392	47152	0	9500
R2_p2-2	5bcb89a2-36f9-49b7-b08f-bdd7d5aa601e	89.903	7646	359	315	1	7500	1649	9027	0	9461
R2_p2-2	1a141408-5bdd-473a-b831-5a15d1cc8e4a	89.687	7641	363	347	1	7485	21065	13694	0	9352
R3_p1-1	dbd005bf-e5e5-4cfc-bdce-d6cb6e474954	99.587	5565	12	10	1	5562	30694	25138	0	10139
R3_p1-1	6f685eca-c808-48ad-ba85-00d464561b0d	99.515	5565	7	13	1	5562	21287	26834	0	10109
R3_p1-1	e2902d26-858f-448c-89b2-9d7b34f5666c	99.407	5568	5	15	1	5562	11886	6341	0	10074
R3_p1-1	fee51f44-03cd-42c6-b814-b0cd4a4aae96	99.336	5572	14	19	1	5562	10624	16182	0	10063
R3_p1-1	fb26e544-88b9-468f-9da9-276e73617274	99.353	5565	14	20	1	5562	13619	19164	0	10057
R3_p1-1	2bc3f8f7-aa2f-430c-9770-e0a4517dc55a	99.353	5567	11	18	1	5562	13792	8246	0	10057
R3_p1-1	932ec07d-d5c9-4e4d-a905-c5a00187613b	99.318	5570	12	19	1	5562	9962	4411	0	10052
R3_p1-1	844da9ed-9d49-43e2-812f-8040c2217c07	99.193	5575	20	21	1	5562	22766	17204	0	10022
R3_p1-1	14b783be-f21a-4d21-9547-ebdefb814112	99.193	5576	18	21	1	5562	7654	13216	0	10022
R3_p1-1	9e89a843-eea5-45b2-a78e-39960dd6a8df	99.175	5578	13	24	1	5562	25110	30670	0	10015
R3_p1-1	8fd0185b-b39d-4309-a645-1a7b299f1cb6	99.192	5571	19	19	1	5562	38173	32620	0	10015
R3_p1-1	535fc435-5dab-4732-8116-23a3fd87abf7	99.175	5574	18	23	1	5562	29010	23453	0	10013
R3_p1-1	55e33714-8884-4df4-a7d6-99e87ed3dc5e	99.139	5578	20	23	1	5562	6156	11721	0	10009
R3_p1-1	e77dc89a-667b-4359-a64c-613863a039cc	99.192	5568	19	18	1	5562	10878	16425	0	10009
R3_p1-1	fc958971-725e-42fa-9f0d-941ce3a4eca0	99.156	5572	18	22	1	5562	2898	8450	0	10002
R3_p1-1	b67fd26d-96bc-47ef-8c56-d6c9ed8dbd34	99.156	5570	17	24	1	5562	21584	16037	0	9998
R3_p1-1	d1340bb1-1563-4ef7-abc9-48f7eef13892	99.156	5570	14	23	1	5562	23122	17578	0	9995
R3_p1-1	9d5bce29-b2af-49a5-8c20-aca8609531c6	99.103	5574	13	25	1	5562	8997	14545	0	9982
R3_p1-1	2fec538b-e89c-4e1c-9fe1-aa45d0a61399	99.067	5574	22	25	1	5562	23698	29253	0	9978
R3_p1-1	b142abd5-8cb4-4744-a60e-bb999e8754af	99.067	5574	18	27	1	5562	28999	23448	0	9974
R3_p1-1	2d76547b-4e52-42d8-855e-bc77a5035990	99.085	5571	15	30	1	5562	42222	36679	0	9973
R3_p1-1	c5d58929-395c-4dc0-90ea-8df12d26d027	99.119	5565	13	28	1	5556	13595	19132	0	9973
R3_p1-1	2a478b1a-dc88-4864-ac94-7895c9ceba91	99.049	5575	20	24	1	5562	26662	21108	0	9971
R3_p1-1	1be9afe6-7652-43a9-9523-3c08a3898cad	98.996	5580	22	26	1	5562	22987	17424	0	9963
R3_p1-1	2ea5b42a-d81e-4569-b055-a33bc37f0a7a	98.996	5579	20	28	1	5562	12260	6701	0	9960
R3_p1-1	0359181f-bb78-4115-a11e-10879b7e0630	99.187	5535	16	23	1	5520	7935	13455	0	9945
R3_p1-1	1d79f6bf-78df-419f-bcb3-9ee48a662b6e	98.942	5579	25	27	1	5562	6256	695	0	9945
R3_p1-1	f8d13013-3712-42af-b094-193c153cc820	98.959	5573	26	25	1	5562	6376	11927	0	9941
R3_p1-1	263cd16c-b928-45db-b2cf-08b30cfe56b8	98.96	5575	20	27	1	5562	13551	19100	0	9939
R3_p1-1	b369370b-c080-4779-994b-9c274c4b4fae	98.925	5580	24	27	1	5562	11808	17369	0	9939
R3_p1-1	a55fb8a4-bac2-4741-89d8-608f01405af2	98.977	5574	15	28	1	5562	20686	26229	0	9939
R3_p1-1	d56b0b94-b297-4add-b9f9-37442f4c57cf	98.96	5575	16	36	1	5562	29464	35009	0	9936
R3_p1-1	81ee2bad-9137-4b2d-8101-96a66aaa3121	98.942	5578	18	31	1	5562	6223	11775	0	9936
R3_p1-1	11d8a132-7183-44d9-8c39-4f3242f69b94	98.976	5569	19	29	1	5562	3665	9202	0	9934
R3_p1-1	6fd25752-0e02-476a-9dec-51b5ba4edf1a	98.889	5580	22	33	1	5562	2439	7996	0	9925
R3_p1-1	b1c5dce4-c538-4872-9469-521e4bd66915	98.923	5573	23	31	1	5562	9622	15168	0	9925
R3_p1-1	d02b189e-3563-444b-9829-51d86066bbb2	98.906	5578	20	32	1	5562	5601	11153	0	9925
R3_p1-1	b2f7fec3-d40c-4c15-9b06-7d36a285c9ec	98.888	5578	23	33	1	5562	22331	16777	0	9921
R3_p1-1	7874efec-a5be-48fc-9dcd-a7b56400e2a7	98.923	5573	19	30	1	5562	20587	15045	0	9921
R3_p1-1	6ef108e9-3c07-45fb-8e23-5fe6efe57404	98.905	5569	34	21	1	5562	63511	69059	0	9921
R3_p1-1	b7778c56-2036-4c20-bc6e-aa82b6ad79f3	98.871	5581	22	31	1	5562	22486	16928	0	9919
R3_p1-1	4063d8e8-124d-4b78-b4b4-1b3035968f46	98.887	5570	31	24	1	5562	16737	11191	0	9913
R3_p1-1	41fdee5d-4e6f-45e4-9c60-82a3d14bfe4f	98.852	5576	22	31	1	5562	9639	4092	0	9904
R3_p1-1	9e5d7260-2516-4505-bd12-8527f1d43045	98.799	5581	32	26	1	5562	5046	10610	0	9902
R3_p1-1	51b1dfd1-e20a-43db-99eb-aa791fcc34ac	98.833	5572	24	32	1	5562	8187	13727	0	9891
R3_p1-1	293218b6-cd81-415a-af49-c0753462c9b4	98.782	5582	24	35	1	5562	8390	2833	0	9891
R3_p1-1	b2e45a8e-036b-4969-9f81-2af63f4b7933	98.763	5579	26	31	1	5562	3981	9533	0	9880
R3_p1-1	9712dfc8-880c-4ec1-931a-b677ca9a7e64	98.781	5577	16	40	1	5562	4679	10218	0	9875
R3_p1-1	eb1e0905-fbb6-4b16-8d29-c99d00aef6f6	98.726	5575	28	38	1	5562	9398	3854	0	9862
R3_p1-1	6ddf5f13-84a9-410e-9205-2f4a63375330	98.726	5574	26	39	1	5562	18505	24045	0	9858
R3_p1-1	4025d3c2-a696-483f-81f4-42afacf3fbee	98.708	5573	23	36	1	5562	10049	4515	0	9847
R3_p1-1	4551d018-3401-462d-a7b8-b1aa1e697c95	98.621	5585	31	37	1	5562	28226	22665	0	9845
R3_p1-1	af0cdcac-f3bc-49e7-a565-a3eda96940ec	98.639	5584	23	36	1	5562	1684	7236	0	9841
R3_p1-1	02a5e80f-eed3-4a34-bea0-f0bdd5c112db	98.603	5584	35	37	1	5562	11324	5762	0	9840
R3_p1-1	36256a0e-2323-4baf-b19c-945af664d203	98.619	5577	37	33	1	5562	16555	11004	0	9836
R3_p1-1	86b56b30-1675-4967-8374-8aa2eb09e85d	98.62	5579	25	40	1	5562	35842	30299	0	9828
R3_p1-1	3fe6707f-d1fe-496b-8cf2-833f009487a1	98.585	5584	24	39	1	5562	6166	11716	0	9823
R3_p1-1	6f7eae40-fe36-47b4-a8e5-61292ce32d16	98.602	5580	25	40	1	5562	3339	8883	0	9823
R3_p1-1	25dfd95b-49aa-48ab-92d1-76ea8ce180df	98.551	5589	28	43	1	5562	6483	921	0	9823
R3_p1-1	dfe7b4be-b4ff-4b2b-b5ca-ec12a162b7cd	98.55	5585	31	40	1	5562	18965	13408	0	9819
R3_p1-1	91ca9c35-f9a4-45b7-9c9c-c5fe3a4fbf89	98.584	5578	32	41	1	5562	2096	7642	0	9819
R3_p1-1	b10d4218-b80e-4c92-86fe-b834fa171e7b	98.773	5541	25	33	29	5562	4	5508	0	9816
R3_p1-1	a0d575fa-d894-4b0b-ac52-c25ef21e6c95	98.929	5507	26	27	1	5494	5487	1	0	9812
R3_p1-1	eceb5bf0-890f-4e62-b96e-20840544df36	98.549	5582	30	36	1	5562	15517	21067	0	9812
R3_p1-1	79aa8220-fa08-4a9c-bb2c-27048864f6de	98.566	5580	26	38	1	5562	15010	20553	0	9812
R3_p1-1	33633862-3cba-4a63-81bb-423c3a31764e	98.565	5576	30	37	1	5562	2107	7646	0	9808
R3_p1-1	7b600e5a-1a21-481b-9fa9-a9c25d40ac58	98.529	5576	39	36	1	5562	25645	31191	0	9803
R3_p1-1	28404053-c54f-44e3-9267-51f29e0194fb	98.494	5578	37	36	1	5562	6396	850	0	9792
R3_p1-1	f85a73c8-5af9-44d9-adca-ae087afe2663	98.546	5571	27	39	1	5562	23303	28828	0	9790
R3_p1-1	176ebd3c-3d1f-4485-8816-63641fe70b09	98.511	5576	24	39	1	5562	15096	20626	0	9782
R3_p1-1	2d8a7cea-8b05-4793-a2fc-369f81651136	98.527	5568	33	38	1	5562	13987	8463	0	9782
R3_p1-1	41d392f7-3425-4da5-8a6e-d5e828676464	98.443	5588	25	47	1	5562	26773	21222	0	9780
R3_p1-1	5a8719ed-4e72-4c46-82ce-debb658a71b1	98.407	5588	34	45	1	5562	35250	29692	0	9775
R3_p1-1	f9cce18f-c7ef-4eba-85e5-c4a3c885f23c	98.422	5576	33	36	1	5562	74	5608	0	9758
R3_p1-1	1bc0fbd5-85a7-467b-9406-aa483b07b4a5	98.352	5581	26	46	1	5562	1375	6908	0	9736
R3_p1-1	15b51502-edb6-4f01-967c-73c98e43fbeb	98.35	5577	31	41	1	5562	6277	11807	0	9732
R3_p1-1	7c2a7b25-d05b-4fd0-b086-b175051f8359	98.282	5587	38	48	1	5562	14865	9312	0	9732
R3_p1-1	7bef0b82-c67e-48ba-a61c-31c15c4523ef	98.28	5581	35	42	1	5562	37086	31548	0	9718
R3_p1-1	1110ac42-14ad-41c3-8fd4-8d5cefeade6c	98.208	5581	44	43	1	5562	59924	54381	0	9701
R3_p1-1	aea50c7d-c1b5-41f3-9ff9-a02c08a07631	98.225	5579	40	48	1	5562	15720	21256	0	9699
R3_p1-1	0f0d3455-0f4c-4a04-997f-6ab26b614288	98.191	5584	38	41	1	5562	1210	6752	0	9694
R3_p1-1	0a3e90cc-45a7-44fa-ae4e-b4b3797e9311	98.122	5591	43	49	1	5562	8188	13745	0	9686
R3_p1-1	811f2d94-bbbf-4da3-b89b-f47483ae1efc	98.206	5575	38	47	1	5562	11535	6010	0	9684
R3_p1-1	9839bb4f-195e-43e2-806b-2d6b2cf7d5e7	98.173	5583	35	52	1	5562	12444	17980	0	9683
R3_p1-1	c27db0fb-54ce-42b8-88eb-af26575cba12	98.088	5595	38	53	1	5562	16215	10657	0	9675
R3_p1-1	d977bf37-7b82-4282-a151-023c5a6bab43	98.038	5606	32	62	1	5562	15035	9464	0	9672
R3_p1-1	2ff6f4d2-500f-426f-8d48-856b359d6045	98.051	5594	50	41	1	5562	3868	9434	0	9672
R3_p1-1	17f330ea-d4ad-450b-aacb-7a266c5affc9	98.031	5587	42	54	1	5562	26109	20566	0	9646
R3_p1-1	7d446ded-99b8-4d69-99b3-fede742bb787	98.082	5578	38	46	1	5562	20214	14690	0	9644
R3_p1-1	6aed42d1-f7a9-48cf-928f-4c83324b51b0	98.061	5570	58	37	1	5562	17208	22735	0	9642
R3_p1-1	1d983050-d41e-4689-8a9d-42c091c410ad	98.012	5583	42	54	1	5562	18628	24162	0	9631
R3_p1-1	699f9c78-19d2-4028-be1d-106ced8f91f4	97.868	5581	51	53	1	5562	14560	9029	0	9585
R3_p1-1	6a69b86e-7bc1-4577-9cb8-effa62bc3d3b	97.867	5578	48	51	1	5562	43940	49462	0	9575
R3_p1-1	8e56f33e-2a5e-4e0f-a195-55d19a7557a2	97.723	5577	49	52	1	5562	13661	19174	0	9524
R3_p1-1	bbd2057d-244d-4de2-9a59-9a5feaf6b892	97.621	5591	52	61	1	5562	2505	8043	0	9513
R3_p1-1	8f299cba-ada7-4f0c-959d-ba2b4e2930fc	97.551	5594	65	58	1	5562	7556	2003	0	9505
R3_p1-1	68f76f93-a6ae-4410-a0d5-4b733dc599ba	97.568	5591	59	58	1	5562	13217	7675	0	9500
R3_p1-1	8c907b68-4fb9-4394-b446-ea31d08a92dd	97.549	5589	57	59	1	5562	18535	24070	0	9489
R3_p1-1	3aa64354-503c-4acf-b112-3a0042b435a2	97.53	5586	57	72	1	5562	11356	16884	0	9476
R3_p1-1	fd5bc0c6-77b0-4dec-9edb-40a8922319ea	97.491	5581	56	60	1	5562	8161	2646	0	9454
R3_p1-1	9beedc72-e6d3-40eb-8929-3a9c42336000	97.408	5594	60	68	1	5562	11345	5805	0	9448
R3_p1-1	fecd545e-f046-40b4-88a1-5243076cb162	97.335	5590	62	62	1	5562	790	6320	0	9417
R3_p1-1	4affb189-9112-440b-b75f-1891c0b56f1f	97.366	5581	58	63	1	5562	55118	49608	0	9409
R3_p1-1	75ef3ed3-1963-46e3-89e9-09756baa3ade	97.283	5594	65	64	1	5562	14389	19927	0	9407
R3_p1-1	1f939495-15ea-46fe-9e19-c0a969025c2d	97.136	5587	66	69	1	5562	1098	6615	0	9345
R3_p1-1	02cb8459-4aa2-4b47-882e-32c771f4fee1	97.119	5589	59	72	1	5562	14909	9396	0	9335
R3_p1-1	1dcbc04f-b214-43f6-bfcd-3869774a775d	96.982	5600	61	81	6	5562	20216	14682	0	9306
R3_p1-1	f9e89d7d-f6c9-486f-9485-5b58332b3f9d	96.679	5601	80	77	1	5562	35663	30130	0	9215
R3_p1-1	5e5cff6a-c3f3-4cf5-86b2-bd9ab51c50a1	96.045	5638	84	101	1	5562	8054	2480	0	9047
R3_p1-1	a7cd98f9-35ad-432e-997b-564e890da825	96.132	5610	97	97	1	5562	11302	5765	0	9047
R3_p1-1	8bbd6141-af50-4ddd-a592-4d239f4bd10b	95.905	5616	102	98	1	5562	11112	5571	0	8979
R3_p1-1	83e3134f-89bf-4138-903e-10fbb76f7635	95.808	5630	95	102	1	5562	41256	46812	0	8959
R3_p1-1	37d35515-ba51-490b-9e4c-cd132a51a4cd	95.63	5607	98	106	6	5562	23234	17725	0	8861
R3_p1-1	944f62f0-055f-4550-9e5e-354f54f7ef4c	95.485	5626	75	124	1	5562	7755	2245	0	8817
R3_p1-1	9017ce80-cac1-498e-b519-daa1b36d730f	95.36	5625	119	98	1	5558	34781	40330	0	8811
R3_p1-1	0dac3d11-675e-42e5-af1a-e40c47ff573b	95.49	5587	97	101	1	5553	7143	12608	0	8778
R3_p1-1	6e131ae1-ba99-4f18-b2ad-05e23b825eb6	95.575	5559	89	111	26	5562	13422	7999	0	8757
R3_p1-1	6cedda82-7b4e-490f-a463-d43a1d68ebf8	94.204	5590	135	126	1	5542	14662	20110	0	8353
R3_p1-1	014bd96d-c11a-451f-b2e1-874bd24dd619	93.216	5631	167	161	6	5562	14212	8723	0	8083
R3_p1-1	3cddce82-f9bc-45e1-b1d3-fc1349e14850	92.696	5641	203	165	1	5562	8177	13687	0	7941
R3_p1-1	37040db9-00e1-45d2-8899-5c7cf6696a42	92.73	5612	148	161	1	5562	33786	28385	0	7864
R3_p1-1	dd1f034e-68b2-4180-9499-2093d63dae16	89.286	5619	271	236	1	5532	6612	1238	0	6735
R3_p1-2	5616d742-4f1c-4f42-9294-a10451b7d5a6	99.444	5572	6	20	1	5562	10009	4453	0	10094
R3_p1-2	21e4ebfa-a157-423f-9bc0-846620b0ef95	99.317	5567	16	18	3	5562	8259	13810	0	10050
R3_p1-2	f0417774-8fba-4a66-a392-92e448828f03	99.245	5565	17	19	6	5562	3081	8628	0	10021
R3_p1-2	8ec51716-f7d8-4edc-bb91-b6a64a2b11bd	99.139	5576	21	20	1	5562	522	6084	0	10006
R3_p1-2	363f3627-a7aa-4745-a0f2-6b3d08e692e2	99.138	5569	26	20	1	5562	15650	10097	0	9998
R3_p1-2	bd537b2a-309a-43ee-90fb-9cd4e17824cc	98.996	5580	18	29	1	5562	10999	16558	0	9960
R3_p1-2	bab07233-6444-48ee-b723-3347344bc7d2	98.959	5572	21	28	1	5562	27768	33312	0	9934
R3_p1-2	88ab7721-deb1-4d96-a491-8e27adce84cf	98.906	5576	17	25	1	5562	22361	27906	0	9919
R3_p1-2	81bcf77d-c472-4e36-b2b5-afa6f50c4fe9	98.888	5575	22	29	1	5562	9062	3515	0	9915
R3_p1-2	75d67a97-f503-41f5-a083-6ded0f261ae0	98.853	5579	22	30	1	5562	7199	1646	0	9910
R3_p1-2	c6fd025f-d786-404c-9764-c2f8effa9a99	98.834	5575	28	29	1	5562	7736	2186	0	9901
R3_p1-2	9aca4546-d761-4798-b04a-f2b0c31c7846	98.71	5582	32	31	1	5562	5827	266	0	9873
R3_p1-2	6ef108e9-3c07-45fb-8e23-5fe6efe57404	98.726	5572	30	32	1	5562	29809	35349	0	9858
R3_p1-2	2db6f554-28da-4299-b25e-0714c747f492	98.673	5575	25	34	1	5562	30486	36024	0	9840
R3_p1-2	901d66b5-0b0f-44f2-90d1-ac90100c0840	98.638	5578	24	38	1	5562	6465	924	0	9832
R3_p1-2	1a6c31d3-5470-4934-81db-5f9580c4e61f	98.495	5583	32	40	1	5562	18768	13217	0	9797
R3_p1-2	caf45e6d-5828-4fec-961b-e00569e45f1c	98.477	5580	31	38	1	5562	10537	16080	0	9784
R3_p1-2	06d004c0-3261-4b0f-8088-dd000d8ab0de	98.477	5582	25	38	1	5562	8127	13668	0	9782
R3_p1-2	dd548f92-c849-40f9-9da3-16ac2988bfee	98.404	5577	36	34	1	5562	7852	2314	0	9756
R3_p1-2	d21483a7-b3f9-430e-9d2a-8bd4892f06a5	98.243	5577	36	41	1	5562	33845	39374	0	9699
R3_p1-2	15143ce0-f38e-4346-b6d0-7db5838e4529	97.909	5595	49	57	1	5562	16439	10880	0	9622
R3_p1-2	1fd4e7c0-e8ba-405d-901b-8beac6f8cd8c	97.959	5585	42	49	1	5562	5743	208	0	9616
R3_p1-2	3199f1a3-e7fa-4d63-9209-d719539478f2	96.315	5618	78	87	1	5562	29409	23865	0	9108
R3_p2-1	5fb7d034-1c7f-44da-b23d-9f653d34aa1f	99.444	5572	14	13	1	5562	10613	5049	0	10102
R3_p2-1	afdc7e41-21fa-4c27-a956-56d77bf82245	99.425	5566	10	19	1	5562	15489	9942	0	10081
R3_p2-1	e63f56b9-b1cc-461d-a703-68932890e349	99.407	5567	13	16	1	5562	26126	31677	0	10080
R3_p2-1	a090d911-848f-4a3b-b35f-402eb6c84294	99.336	5573	16	17	1	5562	6193	11755	0	10067
R3_p2-1	c20e285d-bb5d-46ef-bf7d-463259843923	99.318	5574	9	22	1	5562	17475	11919	0	10056
R3_p2-1	47315577-ff06-4901-b861-bb304ca90b61	99.335	5568	12	20	1	5562	8646	14194	0	10054
R3_p2-1	049ef7bd-f0b2-4eb9-b928-e5407ce5b84a	99.282	5571	17	20	1	5562	11723	6167	0	10045
R3_p2-1	9943f0ef-cb41-4c99-bf4a-98c83f93605e	99.246	5569	17	17	1	5562	10773	16323	0	10028
R3_p2-1	fc08eae4-fdf8-43a4-b1f7-dac0fec686d5	99.263	5565	16	20	1	5562	4404	9946	0	10026
R3_p2-1	15b77e2c-a2a6-4fe9-8687-da83a083209c	99.228	5571	12	21	1	5562	3256	8804	0	10021
R3_p2-1	03c0990e-e96c-446f-9560-942db8c623db	99.175	5575	17	25	1	5562	14603	9045	0	10013
R3_p2-1	a8f59b16-dccb-45af-8815-28e8049548a5	99.122	5580	11	32	1	5562	4395	9954	0	9998
R3_p2-1	c54bac4a-41ad-4769-9d39-c40ffb03b332	99.138	5571	21	17	1	5562	7096	12648	0	9997
R3_p2-1	d197017f-502c-4b0f-bb12-3228660e1076	99.12	5570	20	24	1	5562	8729	3181	0	9987
R3_p2-1	37487058-e601-4b61-8124-cceca3e044d1	99.103	5573	17	27	1	5562	5176	10726	0	9984
R3_p2-1	12666fce-0385-40bb-84b0-4d45148c9995	99.103	5574	12	31	1	5562	14390	8843	0	9982
R3_p2-1	00a2582f-d12b-4a4e-82ef-1fb04a537be0	99.049	5575	19	28	1	5562	3912	9465	0	9971
R3_p2-1	b99b652c-3ad8-4b49-b52f-368288f0af2d	99.032	5577	19	27	1	5562	16413	10857	0	9967
R3_p2-1	1f7f0bab-0661-44fa-9c04-ce46a706d2cc	99.031	5572	23	25	1	5562	3307	8857	0	9961
R3_p2-1	a4606ce5-9af0-46b7-8c57-89e970385519	99.066	5568	17	25	1	5562	11985	17523	0	9961
R3_p2-1	eab07fe1-6878-457a-b34f-5543dae7ad9e	99.031	5571	17	28	1	5562	19126	24668	0	9954
R3_p2-1	08ebc3e4-955e-4e5d-80a0-146dd0930207	99.048	5566	19	22	1	5562	10648	5113	0	9954
R3_p2-1	57258452-138a-4aad-afac-3a246947690a	98.961	5582	21	26	1	5562	25304	19740	0	9952
R3_p2-1	50b7ec6e-6e84-4369-8f62-873f03b1acd6	98.96	5579	23	25	1	5562	25196	19636	0	9949
R3_p2-1	d345e1f8-444d-4410-8f20-3218b1c81927	98.977	5571	24	24	1	5558	18402	23952	0	9941
R3_p2-1	87721fbb-651e-4999-a991-e9fa9bdcc94d	98.942	5579	22	29	1	5562	7697	2139	0	9941
R3_p2-1	e2fa01c5-a3b8-4e2f-a777-585411ebcd19	98.925	5581	21	33	1	5562	13587	19147	0	9937
R3_p2-1	ddfd9ee8-06c2-4d65-9f4e-2765b69331bc	98.959	5573	15	28	1	5562	18646	13106	0	9930
R3_p2-1	207b1598-9326-4e84-be2c-13ac6a576bf4	98.924	5575	22	29	1	5562	13582	19131	0	9928
R3_p2-1	78d2cd8a-5811-4083-89c5-aae264284ada	98.889	5579	24	24	1	5562	5233	10790	0	9925
R3_p2-1	542324a3-20a6-4bc5-834a-fc95d644d140	98.87	5576	31	26	1	5562	11278	16835	0	9919
R3_p2-1	5aaf7dcc-c577-43b1-9bb0-82bd19e6305a	98.905	5571	24	24	1	5562	10302	4760	0	9915
R3_p2-1	a5b45a82-51e9-4e63-8dca-0a6e1d8d8909	98.887	5572	26	30	1	5562	19127	13582	0	9913
R3_p2-1	71f9533c-176f-446e-8e14-fdfab221c16a	98.853	5581	13	40	1	5562	2062	7610	0	9904
R3_p2-1	cc08466b-af62-4475-83bc-d82edc4003dd	98.817	5578	29	28	1	5562	9808	15364	0	9901
R3_p2-1	406f7492-95a7-4185-b4a1-f322421b234a	98.817	5580	22	32	1	5562	18487	24040	0	9899
R3_p2-1	a46eab6a-88bc-47e2-ba5f-664522572130	98.8	5582	26	29	1	5562	10990	5430	0	9899
R3_p2-1	c76553e3-94bc-4e7b-adc3-88e4089426ea	98.834	5575	24	35	1	5562	10728	16274	0	9897
R3_p2-1	dcd26c4c-2e0b-4cb8-b7e2-98e552ae7ee4	98.764	5581	28	27	1	5562	6318	760	0	9886
R3_p2-1	bce31c9d-dbe2-4fbc-8c09-ab0efeb53308	98.816	5572	23	29	1	5562	3207	8745	0	9884
R3_p2-1	466983e0-98a0-45db-81d4-3fe0b75fa407	98.798	5574	23	37	1	5562	2749	8290	0	9882
R3_p2-1	931b4ff1-ac0a-44db-bf17-fb353cc9fab9	98.674	5581	29	35	1	5562	9520	3966	0	9854
R3_p2-1	08f10db7-a751-4f67-ab04-2b92e7bcf20a	98.691	5578	27	41	1	5562	16049	10502	0	9854
R3_p2-1	f6dad491-3626-4253-8d34-f9e312c3dba4	98.64	5590	22	43	1	5562	14480	8917	0	9852
R3_p2-1	a0d87c22-34b9-4922-b6d3-9a1feb595187	98.673	5578	31	35	1	5562	16398	21948	0	9851
R3_p2-1	cd20a94a-b8b4-4e16-949a-74955db6e659	98.674	5580	25	36	1	5562	6432	11980	0	9849
R3_p2-1	27ad5421-52d7-4d87-ac98-773f87fbdf44	98.674	5581	22	43	1	5562	20220	14673	0	9849
R3_p2-1	1fa29b3d-970a-4247-93a3-0120df6faac3	98.57	5593	27	35	1	5562	7402	1832	0	9836
R3_p2-1	ecf1ec93-f9a8-4d96-bd7a-0b2a812626db	98.637	5577	24	36	1	5562	16223	21762	0	9830
R3_p2-1	e61886f1-c945-4ae3-803c-8bfbf5eba0dd	98.621	5584	16	36	1	5562	21499	15955	0	9828
R3_p2-1	d1377e0d-406e-4712-a7f8-9e236d9ae76a	98.636	5572	30	37	1	5562	49215	54750	0	9827
R3_p2-1	229229cc-6988-4abc-8690-49c7a3240e9f	98.568	5587	29	34	1	5562	11738	6178	0	9827
R3_p2-1	d9daf741-52d0-4f0d-b982-528fd0bb9e81	98.602	5580	29	36	1	5562	6194	11742	0	9827
R3_p2-1	11731cdb-4911-45d5-8284-70c1db33681f	98.514	5586	29	38	1	5562	8535	2980	0	9806
R3_p2-1	fcc0f1a3-64a7-4330-88de-5cc03e128348	98.548	5578	30	40	1	5562	24152	29694	0	9804
R3_p2-1	3dc3764b-54ea-442b-9b7b-bcd8858a8cdc	98.513	5581	28	43	1	5562	10130	15674	0	9795
R3_p2-1	dd67a4bd-e59b-4822-a797-5c3c998cf064	98.477	5581	34	39	1	5562	10730	16278	0	9788
R3_p2-1	4b6cade7-9047-47ef-8b33-61797fc0c0cb	98.475	5575	37	39	1	5562	12480	18019	0	9780
R3_p2-1	40754e6a-5359-4245-81f8-41092e51cd6f	98.439	5575	40	31	1	5562	16152	21692	0	9769
R3_p2-1	4beedab2-dc2c-43ae-b2a8-59bae897d825	98.424	5583	30	46	1	5562	1346	6891	0	9769
R3_p2-1	f8af840e-a1cd-4328-b7db-46ee18430664	98.439	5573	35	41	1	5562	3163	8694	0	9762
R3_p2-1	465354d9-419f-4681-9611-def44ef638cb	98.335	5584	34	44	1	5562	81	5627	0	9742
R3_p2-1	4333d6ab-da90-4490-82e5-50c1f6dac7ab	98.42	5569	25	39	1	5562	180	5692	0	9738
R3_p2-1	732ea903-5365-49b9-aef3-687e961bc11f	98.315	5577	44	34	1	5562	8916	14457	0	9732
R3_p2-1	f3fc3706-4bfa-4f87-9f54-253759eaa87b	98.247	5590	32	47	1	5562	6073	522	0	9720
R3_p2-1	effc52ff-e747-4487-abe6-61c07017e446	98.23	5593	33	52	1	5560	15671	10112	0	9720
R3_p2-1	1abf3fd9-ff59-4ef4-8ddd-6b31c7ec5a1e	98.211	5589	45	38	1	5562	6960	12520	0	9716
R3_p2-1	3eea0b78-3aab-4dfc-963a-d83e95b8d80b	98.261	5579	42	41	1	5562	1641	7181	0	9714
R3_p2-1	d928a51a-4245-4b9f-b28f-d1aafd27c542	98.228	5587	38	49	1	5562	6085	535	0	9712
R3_p2-1	07cb5a3f-5abc-4ee5-8e8c-56a34d24a254	98.262	5581	30	47	1	5562	12128	17660	0	9707
R3_p2-1	b5d772b1-eefc-48f1-9400-8b5b2e7525b8	98.174	5586	31	57	1	5562	23038	17500	0	9684
R3_p2-1	42422755-ab9f-45c8-81c4-bf483434c4ac	98.139	5589	35	51	1	5562	13520	7974	0	9681
R3_p2-1	2927161a-b33f-4138-a507-85b8f0272cdd	98.07	5596	36	47	1	5562	18217	12660	0	9670
R3_p2-1	8be07a3c-cc8a-47fb-8156-7eaa8628bf8e	98.1	5580	43	42	1	5562	13170	7636	0	9659
R3_p2-1	672f364b-427b-4237-8170-fc8d2e3e9902	97.996	5590	45	52	1	5562	8663	3113	0	9640
R3_p2-1	30034d1f-e6a0-4da4-863a-6324c380586a	98.064	5578	41	54	1	5562	17142	11616	0	9640
R3_p2-1	e1a2ddd3-8a3c-4500-86e0-6c2eeb4ef03b	97.978	5588	45	50	1	5562	11307	16852	0	9631
R3_p2-1	7a0e0208-cbd9-48d4-a851-aa6522c973d0	98.027	5576	47	38	1	5562	287	5813	0	9629
R3_p2-1	14676aa9-2e10-4f93-bf0a-8f54d3e089d2	97.975	5579	46	51	1	5562	301	5829	0	9614
R3_p2-1	ac3a271a-3379-47ca-ad2d-df31962077b9	97.888	5586	57	48	1	5562	26065	20517	0	9605
R3_p2-1	eba56903-8120-4b87-ba36-9ebeefeef908	97.771	5609	42	64	1	5562	14887	9315	0	9588
R3_p2-1	4199dac1-1a4a-4613-8823-87442c4f4de7	97.869	5584	48	51	1	5562	9344	14878	0	9587
R3_p2-1	1de4cda4-34eb-4dfe-a427-3c18898a7f24	97.817	5588	53	55	1	5562	25005	30549	0	9579
R3_p2-1	d375a77e-5d23-4d9d-ad35-9e4cf5a8a008	98.066	5532	48	47	55	5562	16030	21526	0	9568
R3_p2-1	01ef477a-164c-4c70-b3a6-0fdc184c2c79	97.78	5585	50	49	1	5562	10138	4605	0	9559
R3_p2-1	7762ebe3-839f-40af-9519-a6e7bfa60f4a	97.73	5595	37	58	1	5562	11066	5529	0	9546
R3_p2-1	43dfdc9d-42e1-4241-8c18-7299086383ec	97.743	5583	50	60	1	5562	5717	190	0	9542
R3_p2-1	1fddbf9e-42ef-4af6-bfea-8f2fba33be45	97.672	5583	66	50	1	5562	11582	17121	0	9531
R3_p2-1	16b9135d-4b0a-486e-8f69-8926522e9bed	97.519	5602	65	61	1	5562	594	6161	0	9507
R3_p2-1	93a39406-0d25-46fd-9475-41625ead86f5	97.569	5595	51	60	1	5562	10950	16492	0	9500
R3_p2-1	fe0ceda0-8bea-4d70-8cc8-2bcd82891f6f	97.6	5584	50	58	1	5562	28308	22787	0	9492
R3_p2-1	879a2e69-c79d-4d9b-8ac6-3eb246000a8f	97.582	5583	56	59	1	5562	22265	27789	0	9489
R3_p2-1	be52d402-c4e5-4040-9e12-9e5d280e70a7	97.548	5588	52	58	1	5562	6305	777	0	9481
R3_p2-1	5cb4f373-a235-41dc-9ad7-1b780f2df24c	97.51	5582	61	59	1	5562	9298	3775	0	9467
R3_p2-1	c3862141-9d9d-4e26-9653-705fef37ac8f	97.495	5589	52	72	1	5562	1235	6762	0	9465
R3_p2-1	c4381915-b3bb-41ef-a4ce-390039a76823	97.543	5577	51	62	1	5562	9626	4121	0	9461
R3_p2-1	c89927b6-1896-4cd7-aa2e-c7aad8c2c0e8	97.357	5599	69	65	1	5562	7296	12852	0	9446
R3_p2-1	65d83665-052d-4b07-a1db-d80f3afdc046	97.406	5589	50	70	1	5562	5437	10957	0	9430
R3_p2-1	7387dcc9-7041-4d40-ae9f-f593bc360d6e	97.242	5583	55	68	11	5560	17256	11740	0	9365
R3_p2-1	6ac052cf-4f3b-4875-aff5-c38dabc9fed5	96.695	5597	83	76	1	5562	5132	10661	0	9217
R3_p2-1	325a3f18-a3f1-489c-a414-d4c49cf29485	96.727	5592	78	87	1	5562	9872	15388	0	9215
R3_p2-1	6651ad6c-034e-4aed-b13f-6594eac851c3	96.76	5586	71	77	1	5562	30915	36414	0	9212
R3_p2-1	afac9d8d-a6ea-4acb-b24f-912cdcd340ac	96.586	5594	79	83	2	5562	11484	5970	0	9169
R3_p2-1	83e3134f-89bf-4138-903e-10fbb76f7635	96.243	5616	83	98	1	5562	7692	13233	0	9084
R3_p2-1	f30794cc-7ba7-483f-b5de-44a8c66c63cf	95.48	5597	113	112	1	5556	12782	7285	0	8805
R3_p2-1	57649d09-bf11-4d82-b855-965434e4b556	95.499	5599	88	119	11	5562	12444	6963	0	8793
R3_p2-1	b8f8e88c-2f5b-4c48-8702-271d32bdb47a	95.138	5594	139	108	1	5562	20199	14707	0	8700
R3_p2-1	1672448a-2f98-489e-84dd-c6cb08476d6a	95.052	5598	135	104	1	5562	18615	24106	0	8672
R3_p2-1	ee462d01-322d-4faa-9542-9dcd79230467	94.917	5607	127	105	1	5562	10665	5172	0	8630
R3_p2-1	652476f2-a052-4cab-8628-737f962410d0	94.847	5589	123	121	1	5562	6734	12184	0	8573
R3_p2-1	9bfa1971-ff7c-4776-ba52-7e135aa4c64d	93.974	5609	152	123	9	5562	9364	3887	0	8314
R3_p2-1	30701594-55bc-47b6-b3ff-d19173611031	93.616	5623	154	147	3	5562	1275	6755	0	8205
R3_p2-1	2f3cf573-5b4c-4ee8-b497-090b39d7704b	93.518	5646	151	155	1	5562	8438	13952	0	8200
R3_p2-1	07b6c3ae-624c-455c-945d-87e4975a5776	93.561	5622	144	174	1	5551	19895	25369	0	8176
R3_p2-1	c57265bb-0450-4c09-a33c-c215131b0fa1	92.192	5648	201	185	1	5560	10187	4692	0	7766
R3_p2-1	327d9423-c8c8-46ad-bd8b-79f061a85ab5	89.485	5687	224	255	2	5562	9336	3898	0	6844
R3_p2-2	f8db4d18-4a32-4b5c-a971-75cb50e59d81	99.479	5565	15	14	6	5562	7553	1995	0	10104
R3_p2-2	9cd8da9f-bb9b-41e1-a1c5-054d336e50d2	99.425	5565	14	16	1	5562	10812	5263	0	10083
R3_p2-2	f34c43fd-24cb-4415-aed5-cf5e5a322e05	99.39	5572	14	16	1	5562	7584	2023	0	10083
R3_p2-2	e1f8490b-3902-4eeb-8eea-261b2da6003c	99.354	5573	12	17	1	5562	4718	10277	0	10070
R3_p2-2	66a93234-e06a-4734-b738-1e318221bf25	99.336	5570	11	24	1	5562	4109	9660	0	10057
R3_p2-2	2de76e58-9a1a-47b8-9856-f0b5d91b0124	99.3	5572	16	17	1	5562	9111	3553	0	10052
R3_p2-2	cf82e745-e30c-421a-a9e4-a43680ee70dd	99.318	5573	7	20	1	5562	15585	21137	0	10052
R3_p2-2	7b0b3bc0-6245-4d60-881a-00fcfec5d0b9	99.229	5577	14	21	1	5562	21431	15869	0	10033
R3_p2-2	c871fd3f-0373-4894-8df2-13a14010de2e	99.193	5574	16	25	1	5562	21939	16383	0	10017
R3_p2-2	185d4197-a88f-454f-91c1-83ad58295d34	99.157	5574	29	15	1	5562	41908	36341	0	10017
R3_p2-2	5d79d86b-0978-46a3-b224-aab314896665	99.067	5575	22	24	1	5562	15599	10042	0	9980
R3_p2-2	9b677230-0e46-471d-b0ee-8a0a6e1b2c0f	99.032	5576	13	26	1	5562	10177	15725	0	9960
R3_p2-2	3ed16c8c-fb74-45d0-ad2c-d8819d42d75c	98.959	5572	28	24	1	5562	31906	26355	0	9941
R3_p2-2	eb975227-f099-4a4b-a671-5e9d5ba8bc93	98.889	5583	20	34	1	5562	12943	7382	0	9928
R3_p2-2	a88b7368-7feb-4d2e-8e17-45d69879f9e1	98.872	5585	18	31	1	5562	14693	9131	0	9923
R3_p2-2	db7d6836-0628-42e3-a519-eb47b738d837	98.94	5567	22	30	1	5562	3993	9527	0	9919
R3_p2-2	eb31aa4a-9d5e-4541-98c1-7895c0a71fc1	98.889	5579	15	31	1	5562	3480	9028	0	9915
R3_p2-2	c513004d-fa33-4750-8bc8-f98561d5e823	98.905	5571	20	28	1	5562	4453	9991	0	9912
R3_p2-2	09465407-4dd5-4444-ba03-1dcce4f81426	98.887	5572	17	30	1	5562	7991	13527	0	9904
R3_p2-2	26469f3a-8ed8-41d5-820e-394f5a4a1922	98.818	5582	25	35	1	5562	8176	13736	0	9904
R3_p2-2	ef8e7fb9-6d27-4219-b1ce-b03a6777a134	98.764	5582	24	34	2	5562	11226	16783	0	9884
R3_p2-2	142364e9-dbcc-4587-9d2e-cf84999d45aa	98.762	5572	22	28	1	5562	2743	8277	0	9864
R3_p2-2	edb047d4-f136-40f0-8592-079d0ba9502d	98.654	5574	37	33	1	5562	6853	1306	0	9843
R3_p2-2	4c26b39a-5820-43cd-a834-51edf4865059	98.673	5576	25	33	1	5562	7681	2141	0	9841
R3_p2-2	b09874cd-6417-47bf-b475-2179e3715e61	98.62	5580	32	31	1	5562	16321	21873	0	9836
R3_p2-2	9f85c4f0-5a26-4fce-88c1-04850e41b456	98.653	5568	32	33	6	5562	11799	6264	0	9827
R3_p2-2	d98ee4c7-09fc-4d6a-a94e-510ef5ea4abf	98.514	5585	41	33	1	5562	17204	11639	0	9816
R3_p2-2	11f0bdab-1157-4839-9e21-752f56287a32	98.584	5580	22	39	1	5562	37938	43478	0	9814
R3_p2-2	56c35582-8ed7-4732-be4f-6ec7fc33f276	98.567	5581	23	41	3	5562	8864	14408	0	9810
R3_p2-2	d5c06700-155b-4eb9-8761-c7c9127478ca	98.494	5578	37	35	1	5562	12850	18396	0	9792
R3_p2-2	17611d6f-4dc0-4f55-9128-38ae9407e9f6	98.511	5576	27	39	1	5562	7518	13051	0	9786
R3_p2-2	6a0ea7a6-1b5b-4615-b40f-a6873d367dd3	98.442	5585	31	45	1	5562	27963	22412	0	9780
R3_p2-2	0ca181ff-f63b-4a43-8703-bc3ffd2b15a8	98.387	5580	37	40	1	5562	473	6017	0	9756
R3_p2-2	ad4807c3-55bc-4051-b18d-b0c832dcf01f	98.371	5585	34	42	1	5562	13620	8070	0	9756
R3_p2-2	58c88142-4ec7-4f89-a88b-57178225d1a5	98.317	5585	39	38	1	5562	6802	12354	0	9742
R3_p2-2	be017bb3-0b03-4edb-b1c3-dbe7de563f1b	98.246	5586	39	43	1	5562	2785	8335	0	9718
R3_p2-2	f9f1253f-b1e2-40e8-af5b-1b282e26ec1e	98.245	5585	40	47	1	5562	10508	16057	0	9718
R3_p2-2	7012c8a6-9238-4f2b-8871-42d43ff9e9f5	98.209	5583	34	52	1	5562	14076	8539	0	9696
R3_p2-2	2cd04ee2-87da-407f-bfdb-dfcca81cd09b	98.243	5578	28	55	4	5562	15362	9836	0	9694
R3_p2-2	317fe037-18b1-4d8e-8a25-1d4de4759b2c	98.103	5587	45	42	1	5562	3143	8693	0	9673
R3_p2-2	812e649b-76e2-43c4-88d3-72f26fd65ae0	98.121	5589	33	51	1	5562	16502	10959	0	9673
R3_p2-2	f735e4b7-6770-4be8-97e5-6a66d7c6968e	98.101	5581	48	54	1	5562	45734	51275	0	9666
R3_p2-2	5586aa39-1a86-4c7c-b4e5-740df01b819b	98.136	5579	38	45	1	5562	19319	24848	0	9666
R3_p2-2	827be706-2e76-46ad-a008-34b3a6756484	98.136	5578	31	55	1	5558	3601	9125	0	9657
R3_p2-2	c8cdd684-b64f-465c-9f04-c3f4dd96ea87	97.994	5584	50	41	1	5562	16743	11200	0	9635
R3_p2-2	5a9f1a41-dc3b-4f0f-b206-03043ba1e8d6	97.962	5594	44	57	1	5562	8866	3311	0	9635
R3_p2-2	ca43a0af-7f24-43e6-88df-0919d1ed1fc2	97.587	5594	47	65	1	5562	10871	16408	0	9502
R3_p2-2	1b6895c3-c7c5-497b-9bf1-53c33e1e6984	97.499	5597	53	71	3	5562	8187	2641	0	9479
R3_p2-2	d680e4bc-ce41-4f33-9754-0ef4fbfc7400	97.51	5583	59	66	1	5562	14538	9015	0	9467
R3_p2-2	bd0b0025-e296-40b0-9724-777fc592fb36	97.455	5579	56	62	1	5562	6418	11927	0	9437
R3_p2-2	103c542b-ddfc-475a-b9ac-efc194bd680f	97.331	5582	65	67	1	5562	6443	926	0	9406
R3_p2-2	a9c2b7ef-9236-41ff-ad3d-65825433789d	97.183	5608	45	76	3	5562	27487	21945	0	9376
R3_p2-2	963a5267-d04e-4eb7-829e-8c9dc1b1e31b	97.158	5595	64	70	1	5562	11399	5867	0	9363
R3_p2-2	90f42e5e-8177-4c7f-b715-7eec8a6aacf1	96.911	5601	68	87	1	5562	17212	11678	0	9287
R3_p2-2	5cdf69cb-4be2-4b10-addf-3f004042f6fd	96.535	5599	80	95	1	5562	13604	8083	0	9160
R3_p2-2	4038bbd6-3d65-492a-acf9-fa8e0c2f6c6e	96.205	5587	90	84	1	5562	6046	557	0	9031
R3_p2-2	b22532f7-2943-448e-9270-1bed886ee71a	96.018	5600	79	100	1	5561	26457	20963	0	8973
R3_p2-2	f3f54d36-59ea-4369-9149-5c7bdd53b914	96.022	5555	94	95	13	5541	10542	15995	0	8916
R3_p2-2	9e310a5d-b5e0-49b9-b308-12ffe8352cd2	95.559	5629	91	120	5	5562	13266	7726	0	8863
R3_p2-2	1f45352e-c61f-4e26-96da-3efd058bbc48	93.607	5631	158	157	3	5562	6252	753	0	8218
R3_p2-2	461820c4-04bf-45a6-91a0-ff7f219f86a3	89.764	5627	309	230	12	5562	5695	11130	0	6953
R4_p1-1	7013630f-23d8-4300-ad01-5ac35fa994c7	99.594	4436	3	12	1	4430	30915	35341	0	8078
R4_p1-1	0f7bf959-657f-41b8-a609-1c7c3a9bd846	99.572	4436	5	13	1	4430	19690	15263	0	8074
R4_p1-1	bb9b6d0f-c7a6-4aa0-b6da-fc1eda579ee8	99.527	4438	6	10	1	4430	5715	10145	0	8065
R4_p1-1	597903d6-3299-4412-a0ee-f47ab23aa51b	99.526	4435	8	11	1	4430	17738	13312	0	8061
R4_p1-1	15364b71-c9e1-425a-9f98-360583ae1245	99.482	4437	7	14	1	4430	7241	2814	0	8052
R4_p1-1	50dec7b4-f540-4db2-ae41-d40f442a9dee	99.459	4438	8	12	1	4430	41936	46365	0	8048
R4_p1-1	88cc84d7-bc87-40e4-b4b1-9a3b2e805725	99.415	4443	7	13	1	4430	7567	12003	0	8043
R4_p1-1	4d0abfc9-9c03-458b-963e-e095e2192dd0	99.437	4437	3	14	1	4430	21180	25601	0	8035
R4_p1-1	a2bf66da-0a99-4083-8e5b-6914a969529e	99.347	4438	12	15	1	4430	11105	6677	0	8019
R4_p1-1	8a0ae6d0-5913-44d0-9bc5-e1ed0cf218e9	99.369	4435	6	15	1	4430	6292	10709	0	8015
R4_p1-1	2845dfe3-7126-45b4-82dd-97f38e90cbc0	99.324	4439	8	16	1	4430	8673	13098	0	8011
R4_p1-1	6710e4ea-33be-4224-81d5-954e1b18c88c	99.323	4432	10	13	1	4430	38759	43172	0	8000
R4_p1-1	63ea1813-9ee2-45e8-baac-338d7908b5a3	99.323	4434	6	15	1	4430	5292	879	0	8000
R4_p1-1	7a18f926-a8d0-43b0-aa47-e46bf9ac2182	99.256	4437	13	18	1	4430	7055	11478	0	7993
R4_p1-1	1686255e-da9a-45ab-9e60-23ce78c32c3a	99.278	4432	12	15	1	4430	22547	18134	0	7989
R4_p1-1	acf7ed49-46e5-4e40-9e23-401f692d2a0c	99.234	4441	6	17	1	4430	16871	12448	0	7987
R4_p1-1	0916c563-7de9-49bb-a494-e3ec430c76fd	99.212	4440	12	17	1	4430	49498	45072	0	7984
R4_p1-1	2f12b365-318a-48a8-a421-2ec9bd38b538	99.212	4440	10	21	1	4430	16774	12350	0	7982
R4_p1-1	b1e57547-ce92-4def-b748-e0e7e46c74fd	99.211	4437	13	18	1	4430	16021	20442	0	7980
R4_p1-1	aab6cc2b-8288-4b8d-86c6-0ec11700baa3	99.211	4437	12	21	1	4430	27420	23000	0	7978
R4_p1-1	0a311339-e549-48dd-b32e-675e249c639a	99.189	4439	13	18	1	4430	586	5010	0	7976
R4_p1-1	7e61ea9e-3b0a-4dc5-9889-bb1dd6e5eaf4	99.321	4416	12	16	17	4430	751	5150	0	7973
R4_p1-1	d114f571-9c99-42fa-bab1-e99ef96fff84	99.145	4444	11	22	1	4430	17651	13221	0	7971
R4_p1-1	ca4a362a-3daf-4cc2-b295-19771e3ebebb	99.123	4445	14	20	1	4430	10873	6439	0	7969
R4_p1-1	2d78f20e-7f8f-42e2-9692-0930d3330464	99.144	4440	15	17	1	4430	14383	9957	0	7967
R4_p1-1	6cd905f0-1400-401c-83f4-257a6a68ebad	99.144	4438	15	20	1	4430	13751	18173	0	7963
R4_p1-1	4abb57fd-fc65-4bd7-aa6b-11f1f5829976	99.1	4445	8	15	1	4430	15483	11056	0	7958
R4_p1-1	66850ef6-0452-4b75-a642-2011fbe1287f	99.077	4443	19	11	1	4430	7282	2849	0	7958
R4_p1-1	44cacd2e-424c-479e-95d0-df9b8ed84a10	99.077	4443	19	18	1	4430	17198	12765	0	7958
R4_p1-1	eb11ad64-611d-4159-b5a1-5e3a3b94247f	99.099	4439	15	17	1	4430	6886	11308	0	7952
R4_p1-1	9b66a706-d454-4259-acf3-4e850d4ad5d0	99.055	4446	14	21	1	4430	774	5207	0	7952
R4_p1-1	8744f938-b47a-40b4-a249-29730fb4b7c5	99.143	4432	13	19	1	4428	13354	8944	0	7950
R4_p1-1	883fb600-4e15-4fb6-8492-b73683790474	99.032	4444	17	22	1	4430	2254	6685	0	7945
R4_p1-1	e4208a28-e428-4853-a223-7c14e1f72f31	99.032	4443	14	26	1	4430	18931	14505	0	7939
R4_p1-1	20919596-393d-4e8d-84c1-a796d05a8de7	98.988	4448	14	22	1	4430	7414	11848	0	7936
R4_p1-1	aed27e27-d243-4399-9c96-a6e4ba5d0bc5	99.009	4441	15	23	1	4430	10995	15417	0	7930
R4_p1-1	a5e4055f-5fd5-4cca-b0b6-01da40bef3ae	98.965	4444	21	18	1	4430	17951	22383	0	7928
R4_p1-1	de7dcebd-387a-4a18-92c0-575e1aac91d2	98.943	4445	13	27	1	4430	3806	8231	0	7917
R4_p1-1	26bcf02e-c0e0-4619-b5e0-3b40b2a0a0ed	98.985	4435	17	21	1	4428	23805	28218	0	7915
R4_p1-1	49dd5ca7-068d-4fc1-8d21-a4bfea19c0c8	98.92	4445	17	26	1	4430	20335	15907	0	7914
R4_p1-1	b0f77732-b5e2-49dd-95ad-e00c9ebf2e3e	98.92	4445	14	25	1	4430	13131	17556	0	7912
R4_p1-1	8f5a298b-cd09-4ca2-a1f2-2d74cdd8ada2	98.918	4436	26	20	1	4430	3288	7707	0	7906
R4_p1-1	f0d3a0f9-a1f6-4c0e-8645-de8a8c75dee9	98.984	4431	14	21	7	4430	7525	3119	0	7904
R4_p1-1	c37fe8e2-9680-4d24-b034-9ebfa5eb1661	98.985	4432	10	26	11	4430	9347	13755	0	7902
R4_p1-1	0e37e005-4ca7-46ff-9288-494ac0f80a4a	98.896	4438	17	20	1	4430	8634	4221	0	7895
R4_p1-1	b68cddd1-c3d7-40a7-ab57-6ced9dd9d443	98.874	4440	18	26	1	4430	1090	5507	0	7893
R4_p1-1	299c2096-d9cb-47f2-81ec-4d5c7bad3d06	98.895	4436	17	22	1	4430	20724	16315	0	7891
R4_p1-1	fe1f415c-da70-408d-88b1-089a56740019	98.851	4439	21	20	1	4430	20178	15761	0	7888
R4_p1-1	fdf38036-73d4-4e79-b67a-d25c906d406d	98.829	4441	20	24	1	4430	23106	27525	0	7884
R4_p1-1	83770250-77f9-4c9c-8201-360aa3402397	98.829	4440	19	32	1	4430	33494	37910	0	7880
R4_p1-1	5366359a-8775-4877-a8ba-47877416ed70	98.85	4436	18	25	7	4430	30326	25912	0	7878
R4_p1-1	f00015fc-da13-4d67-a2b9-7c7aec9c158a	98.829	4439	17	26	1	4430	11254	6842	0	7877
R4_p1-1	915589fa-3252-418e-a06c-515a59207418	98.763	4448	18	29	1	4430	13438	9010	0	7875
R4_p1-1	03f6d9a2-6fa7-4e3b-8aac-e56984cb1eef	98.981	4414	13	28	34	4430	1	4399	0	7873
R4_p1-1	493c30e6-4606-43a1-9a49-559d1ad7c5cc	98.826	4431	24	24	7	4430	5860	1451	0	7869
R4_p1-1	c1e7ccab-1b5b-4bd0-ba6d-5472976c1bb0	98.74	4446	23	24	1	4430	6224	1796	0	7869
R4_p1-1	a527969a-eed1-45d1-9f2a-3ae53d109561	98.805	4436	20	25	7	4430	23840	19426	0	7867
R4_p1-1	da35194b-9083-43ca-bf41-f41cbe6ad16c	98.761	4439	24	24	1	4430	8637	4221	0	7864
R4_p1-1	5615f6f7-8548-4402-a9a4-a3538ab94b80	98.76	4437	23	27	1	4430	10124	14535	0	7860
R4_p1-1	4041ace3-f46c-4bec-ae42-856129a95226	98.717	4444	20	27	1	4430	26494	30914	0	7856
R4_p1-1	14d46953-39ba-4a22-8182-5f7da41593b6	98.718	4447	13	21	1	4430	19932	15513	0	7856
R4_p1-1	520c8991-dbd2-4fbd-85b5-dde9efd9ded8	98.695	4445	24	28	1	4430	2418	6843	0	7856
R4_p1-1	482066af-cfe8-4cd7-add5-4c445034adf7	98.716	4439	27	24	1	4430	8862	4445	0	7854
R4_p1-1	dae5656e-38de-45fe-9765-8322d7700ba0	98.673	4447	24	31	1	4430	8831	4403	0	7853
R4_p1-1	9450dc71-aa80-4e62-b816-caadd84abe16	98.651	4449	24	26	1	4430	2713	7144	0	7851
R4_p1-1	052e76d4-8412-4321-a1e1-82dc5f69265b	98.673	4445	17	29	1	4430	17634	13217	0	7843
R4_p1-1	efa5ae40-e637-4023-8eca-108fc69cf793	98.672	4444	20	23	7	4430	4898	474	0	7843
R4_p1-1	17f93c7f-f5e8-4e18-9589-9d9f0a6e1000	98.628	4445	27	27	1	4430	61580	66005	0	7840
R4_p1-1	0a530604-8d3c-4c03-8733-82b17f273285	98.65	4443	22	33	1	4430	19254	23671	0	7838
R4_p1-1	3594d604-aed0-420b-bc96-dd82e6c24395	98.604	4442	29	24	1	4430	4844	424	0	7829
R4_p1-1	2d679d51-7379-44d4-8c4c-1f8d02d6f4cf	98.626	4439	25	26	1	4430	10191	5780	0	7827
R4_p1-1	795d565e-b29f-4b17-abfd-6f5c4e0ef6c3	98.605	4444	17	30	1	4430	6303	1891	0	7821
R4_p1-1	20ae4e5a-c226-4f7e-8cb2-015506440627	98.647	4434	19	25	1	4430	12875	17271	0	7817
R4_p1-1	9540c5bd-59c4-4dfd-b2b6-b445aad6c5bc	98.58	4438	27	25	1	4430	5036	9445	0	7814
R4_p1-1	8110c5c0-3b5b-4980-a5d9-fac595e37b8c	98.515	4444	35	26	1	4430	11218	6792	0	7812
R4_p1-1	70d0ea14-62d7-45a6-b033-d80162fb32b2	98.494	4450	28	27	1	4430	19192	14762	0	7810
R4_p1-1	678467c4-35c2-4fbc-a85e-869edacdbf7c	98.537	4443	28	32	1	4430	555	4973	0	7810
R4_p1-1	175b4691-8dbc-4c2a-831a-2a5dbae578c4	98.493	4447	31	27	1	4430	6423	1996	0	7808
R4_p1-1	a290e7f9-de28-4d30-b324-db39ea0ae431	98.558	4439	26	30	1	4430	20150	15741	0	7808
R4_p1-1	2bec95d9-1720-4998-93d7-d1bd2b46be78	98.558	4438	26	26	1	4430	32714	28307	0	7806
R4_p1-1	aed973c9-c261-4fee-92c8-4eb0fd45ad21	98.495	4451	20	33	1	4430	24501	20077	0	7805
R4_p1-1	68acc7b6-d77b-45db-8ff1-f90ddcc0473e	98.493	4445	31	27	1	4430	18643	14220	0	7805
R4_p1-1	6e7f8b89-a03e-46f9-be2c-d67b36a66154	98.493	4447	24	31	1	4430	45851	41431	0	7801
R4_p1-1	dcd7b5f6-39d5-4520-9f79-c32fa6b4743c	98.451	4454	19	35	1	4430	8611	4184	0	7797
R4_p1-1	7b588a4f-c1ed-4b0a-a669-0e56e6f95db0	98.514	4440	22	35	1	4430	14033	9628	0	7793
R4_p1-1	5943bcbc-3527-4df4-95f0-a5ca260b66cd	98.448	4446	30	32	1	4430	18435	14013	0	7792
R4_p1-1	f9af7f94-2624-4235-a075-4df3fd9a35dd	98.427	4449	26	37	1	4430	4351	8774	0	7788
R4_p1-1	781b9d44-77f8-4fe6-ab19-8eef71952d6e	98.427	4451	22	38	1	4430	24219	19796	0	7788
R4_p1-1	ebc03dc7-119f-44d1-8ca3-ae48385345a2	98.492	4443	17	30	1	4430	3598	8003	0	7788
R4_p1-1	bab2ae4b-3275-484d-9054-2425706a2723	98.424	4442	32	31	1	4430	6353	1938	0	7781
R4_p1-1	6d0e5696-d53c-4269-9b34-d0f184486517	98.425	4445	25	34	1	4430	11643	16057	0	7779
R4_p1-1	dbb810de-d5e3-4cba-b81b-3b616bc61ba1	98.573	4416	32	25	21	4430	12046	16436	0	7777
R4_p1-1	a9a135a3-b373-4ea3-bece-1e1c33bb2b44	99.034	4348	18	21	93	4430	1	4334	0	7775
R4_p1-1	7f8a77a4-a513-44e7-8ce0-cdee467340ec	98.358	4445	33	33	1	4430	12029	16448	0	7768
R4_p1-1	4380b050-345d-49ec-8794-e3e4b8b73e12	98.338	4453	24	36	1	4430	686	5111	0	7768
R4_p1-1	523adf63-ed76-405f-b5e2-88a061cf20f9	98.272	4457	31	39	1	4430	30443	34880	0	7762
R4_p1-1	4627aed3-6a88-4c84-bc86-b72d8d8eea5f	98.378	4439	25	36	1	4430	8284	3884	0	7755
R4_p1-1	3072179b-f9f3-48ee-8d20-b3e59109c281	98.226	4452	29	43	1	4430	13510	17933	0	7738
R4_p1-1	15b3f971-060c-4f9c-affa-6814ae8aea4c	98.288	4438	34	31	1	4430	12069	16472	0	7736
R4_p1-1	6479b489-52fd-40ac-b604-c12fd36ee730	98.311	4440	23	36	1	4430	411	4808	0	7736
R4_p1-1	e13e7005-a616-4a77-94aa-d20a6de93338	98.353	4431	28	34	11	4430	9752	14148	0	7736
R4_p1-1	ff272645-1fe2-4f80-87d6-f6e432cffbe2	98.288	4438	32	29	11	4430	12154	7743	0	7734
R4_p1-1	799cfe98-3859-489c-a6fc-6ec8680ede52	98.203	4451	28	38	1	4430	9501	5082	0	7729
R4_p1-1	2cde380b-fe86-40ee-b680-cb93e9c41846	98.243	4440	34	33	1	4430	9599	5194	0	7727
R4_p1-1	6fb92ad7-681a-4790-adf6-d3684b401f2a	98.219	4436	38	35	1	4429	37194	41595	0	7716
R4_p1-1	a948f2ff-ef3a-4cce-a3de-7d38d299fbc4	98.694	4363	27	24	1	4353	13846	18188	0	7714
R4_p1-1	1def68ba-6494-4020-afc8-2c53e71b20d4	98.112	4449	43	27	1	4430	637	5063	0	7712
R4_p1-1	4338be81-2d54-4ba9-9b9f-ed598035fa61	98.114	4453	33	41	1	4430	14132	9708	0	7710
R4_p1-1	5a33314a-5bfa-4f63-987c-ef24b9a652d3	98.131	4442	45	31	1	4430	10450	6035	0	7709
R4_p1-1	90d1fa8d-c322-4839-92be-fa59550a4da4	98.197	4436	35	34	7	4427	4454	49	0	7707
R4_p1-1	4c198c16-4b02-4375-9024-5a35e38ba925	98.065	4445	35	39	1	4430	23424	19016	0	7685
R4_p1-1	5811ffb7-d3bc-42ff-a41a-029eee5d2cf9	97.976	4446	30	50	1	4430	33647	29246	0	7657
R4_p1-1	2bc8fd00-319b-4ed4-bf2a-aa5c799ae029	97.91	4449	34	51	1	4430	15028	10620	0	7646
R4_p1-1	fd0e77fd-fe7e-4695-b3ee-4f44e6f89e09	97.804	4463	32	45	1	4430	808	5237	0	7638
R4_p1-1	a525df6d-2d7b-4bca-a7d1-21ccbd908ca0	97.783	4465	34	51	1	4430	12214	16648	0	7637
R4_p1-1	101a505c-dcf6-4e23-8c18-513174325a4e	97.887	4448	33	52	1	4430	11140	15544	0	7637
R4_p1-1	0cfb3431-77ce-448a-a28f-8f6a40111148	97.822	4453	42	40	1	4430	1520	5940	0	7635
R4_p1-1	a67c815b-d2d3-4d37-b929-19ea7177f94d	97.843	4450	41	43	1	4430	3112	7526	0	7635
R4_p1-1	991c81ff-85f9-4f6c-add3-e7755cee90ec	97.839	4443	48	40	1	4430	15395	19802	0	7629
R4_p1-1	d9cdde73-5717-4577-9857-295753d133d4	97.839	4442	48	38	3	4430	7356	2949	0	7627
R4_p1-1	5d5f796d-58bb-462f-8e14-c0d003dd7d66	97.798	4451	39	46	1	4430	7148	2736	0	7622
R4_p1-1	fd94a181-0e42-453d-b010-5bcc3692ad5a	97.904	4436	31	36	2	4430	45696	41316	0	7620
R4_p1-1	21e60cdb-ae6b-4093-b3cc-6a9108118548	97.69	4459	54	42	1	4430	5814	1376	0	7618
R4_p1-1	53a6473f-19af-4d70-940b-fcc4305a3d8f	97.796	4447	43	45	1	4430	13890	18298	0	7618
R4_p1-1	1a3edda2-42bb-4ee9-b6c8-e26770e09eea	97.713	4460	45	49	1	4429	10670	15103	0	7618
R4_p1-1	608de730-f0cf-4ec5-b879-f738b3702829	97.733	4455	44	47	1	4430	19214	14792	0	7614
R4_p1-1	a515bb36-453a-46d2-b14c-043d7bf691a9	97.73	4450	49	42	1	4430	26571	22154	0	7611
R4_p1-1	562b056d-adca-40f2-be31-f902c2cb59a1	97.691	4461	40	44	7	4430	44622	40188	0	7609
R4_p1-1	86d1cd07-cc2a-4bbc-a198-101a9dcc35fa	97.752	4449	43	49	1	4430	3947	8357	0	7609
R4_p1-1	f395ddac-53aa-4620-b146-c62d3e134355	97.73	4450	46	49	1	4430	4623	209	0	7607
R4_p1-1	ed35ee8b-9242-42e3-b4cb-f48579271a4f	97.79	4435	46	40	11	4430	667	5064	0	7600
R4_p1-1	52f0ef85-4521-4423-bcbc-70b4ef621d4a	97.898	4425	28	43	34	4430	29460	25073	0	7596
R4_p1-1	caa2b7d0-3487-4b59-b2b2-3f2f089b3a8b	97.617	4448	56	44	1	4430	9940	5525	0	7581
R4_p1-1	411a1994-ee6b-456c-8d14-86180c7f67de	97.639	4448	44	48	1	4430	23555	19151	0	7576
R4_p1-1	10a7596e-b932-440e-8031-ad288421deb5	97.723	4436	40	41	1	4421	388	4777	0	7576
R4_p1-1	63ea46b7-245a-46d9-8000-0bb179ac9ecc	97.528	4450	48	53	1	4430	184	4591	0	7552
R4_p1-1	4cd96866-b160-40da-9ec0-71d344519642	97.438	4450	45	46	9	4430	16242	20650	0	7522
R4_p1-1	e4d0302e-bc76-4c03-b588-cf009e9ac1b1	97.371	4451	59	45	1	4430	6188	10601	0	7518
R4_p1-1	28d4c369-c998-4e19-ad94-45dc26a4e6a1	97.351	4454	51	47	1	4430	10304	14714	0	7509
R4_p1-1	86cfb9e4-20f6-4807-8455-f5025f2ce17a	97.332	4461	35	58	1	4428	28062	23653	0	7502
R4_p1-1	d4099916-a71c-49a9-baa6-40f95589e8fc	97.283	4454	52	56	1	4430	2467	6875	0	7491
R4_p1-1	7f523e52-ae7a-4f19-b7dd-f491be2e3374	97.262	4456	51	59	1	4430	8467	4057	0	7487
R4_p1-1	478dbcaa-3cef-423a-a375-34cfabd26116	97.177	4463	49	59	1	4430	16815	12397	0	7472
R4_p1-1	643ea6da-9acf-4303-a853-2ac2b8bce115	97.292	4431	45	42	1	4416	322	4692	0	7448
R4_p1-1	707d4b69-326c-4b34-90d7-cbcc7772dd0d	97.084	4458	60	47	1	4430	897	5312	0	7448
R4_p1-1	27fc4313-e7f4-467d-a766-9849f790206f	97.033	4449	66	54	1	4430	18476	14075	0	7424
R4_p1-1	a7a70fb0-1fe4-46ff-b9b8-2bd981170a2d	97.013	4452	53	62	1	4430	15381	10988	0	7411
R4_p1-1	33b4cc39-25ab-4c58-9acb-b4e781a8cbf5	96.928	4460	57	63	1	4430	1319	5728	0	7404
R4_p1-1	1f9dfa50-be06-41ca-8fc4-3e8523ec4801	96.944	4450	59	60	1	4430	7598	3206	0	7393
R4_p1-1	c1767dfc-9e4a-4b91-8f0f-3de67f00d5c4	96.879	4454	65	59	1	4430	24966	20563	0	7387
R4_p1-1	becb5478-a133-4883-a6a3-21889c699ed4	96.919	4447	57	63	1	4430	10567	6184	0	7380
R4_p1-1	79bd9e9d-ecb7-4cca-847a-05b83be22f43	96.898	4449	57	67	7	4430	19823	15431	0	7376
R4_p1-1	c930dfd7-e520-4a0b-814f-6ade783414b7	96.753	4465	69	64	1	4430	4710	287	0	7372
R4_p1-1	0ba25648-863f-4e7d-a455-0c261e68db40	96.797	4465	48	83	1	4421	3303	7716	0	7365
R4_p1-1	a9074a4e-1665-45d3-9e13-05f50fcd97ca	96.734	4470	59	70	1	4430	2844	7266	0	7365
R4_p1-1	3f85a86d-8b88-4a04-9a83-9cc11633930d	96.788	4452	69	54	1	4430	17067	21466	0	7361
R4_p1-1	f74be3c7-fbe8-451e-a819-9a6d78132b12	96.825	4441	49	51	1	4430	15158	19517	0	7336
R4_p1-1	2fb96177-f49a-4fe4-ba7e-6f4e897bfbf3	96.56	4477	64	75	1	4430	16806	12373	0	7332
R4_p1-1	6aa59c51-bc43-405a-947c-869925b350e5	97.273	4364	37	49	7	4353	4299	1	0	7324
R4_p1-1	e906afb8-0a81-4440-9e66-8f6ee4cf9732	96.524	4459	68	58	1	4430	740	5140	0	7295
R4_p1-1	2616e9ca-49e6-4be5-92ba-f416e6b0f289	96.517	4450	66	69	1	4430	2917	7297	0	7276
R4_p1-1	3b625383-2f05-4cd6-83c4-2c82c84955dd	96.324	4461	56	86	1	4416	5236	9633	0	7230
R4_p1-1	74cd6518-9450-4c99-9e68-75c1ab75f995	95.999	4474	83	79	1	4429	31383	26961	0	7182
R4_p1-1	ec4b80d6-7f8f-4580-a1d1-2b34ff4a82d3	96.118	4456	69	84	3	4430	23109	27488	0	7175
R4_p1-1	ebb82bf3-683b-4db0-8c59-56ec91b3f456	96.07	4453	85	71	1	4428	14232	9845	0	7171
R4_p1-1	2f147aa8-324f-4280-8495-4ffac42af0a1	95.921	4462	72	85	7	4428	7222	2831	0	7131
R4_p1-1	29a08c50-85e7-407c-8465-46176a7ef757	95.657	4467	82	82	1	4430	5726	1335	0	7071
R4_p1-1	ba39bc6f-4538-42af-8890-48615336579a	95.425	4481	104	83	1	4430	8571	4141	0	7046
R4_p1-1	62b2c3d0-08ab-47b6-b365-e14ca395a1b3	95.236	4492	89	95	1	4430	19643	15215	0	6994
R4_p1-1	3b7ee105-edd1-4a2f-8092-fd52b1a75c6a	94.761	4486	97	105	1	4429	9977	5573	0	6855
R4_p1-1	b0a69e2f-4122-4a58-9c15-4f904ea8de04	94.458	4457	104	101	1	4429	11021	6680	0	6730
R4_p1-1	cca86ec0-3846-4e2e-b0f3-367f465c7d1b	93.838	4479	143	105	1	4430	19319	23713	0	6619
R4_p1-1	67e0bb2b-ab8e-453d-ad4b-5410faedbe43	93.183	4474	146	125	1	4429	7283	2924	0	6425
R4_p1-1	722857be-fdd4-4a0c-aed6-86f04791c08b	92.624	4474	165	148	22	4427	2245	6621	0	6281
R4_p1-1	0bf9c7b0-56ea-427d-bbc0-75c398fd8952	89.517	4512	225	206	11	4430	2275	6630	0	5483
R4_p1-2	6e24bdcd-b98e-406d-af0f-82b0aaebcc7a	99.684	4436	4	7	1	4430	921	5352	0	8106
R4_p1-2	d51f3243-bd5f-4945-9e67-b37d84345cde	99.617	4434	7	9	1	4430	1270	5697	0	8085
R4_p1-2	87c5bed9-bc9f-4b8e-b871-988c61c533f6	99.482	4440	8	12	1	4430	7851	12285	0	8058
R4_p1-2	bf47819b-f69e-40cc-8d51-5426bbd92188	99.504	4432	8	11	1	4430	10253	14672	0	8050
R4_p1-2	f1efb143-1b19-45b1-b462-cc11c0c9e624	99.391	4434	15	8	1	4430	44590	49015	0	8028
R4_p1-2	c4c7864f-2e52-4f91-a6f0-0dfe661fe018	99.391	4434	12	14	1	4430	12016	16438	0	8024
R4_p1-2	245c90de-d3c6-4b48-bf47-09334463c6db	99.413	4429	12	12	7	4430	9718	14137	0	8022
R4_p1-2	591d867f-43d9-42ec-ae76-783554a814a7	99.368	4432	8	16	1	4430	15088	10675	0	8011
R4_p1-2	5587ece1-9da3-4c29-90ad-03f3cff1e9e6	99.324	4440	7	19	1	4430	6085	10511	0	8011
R4_p1-2	d118cbd5-3f76-4645-8768-85c68fb6b9da	99.279	4437	12	16	1	4430	21640	26063	0	7998
R4_p1-2	a6d5ed2a-1c55-47f9-b6fe-6c77f9dc6dee	99.279	4438	7	18	1	4430	2972	7392	0	7995
R4_p1-2	309686d7-c2cb-4f9c-ad94-f88378777b29	99.167	4444	12	20	1	4430	2457	6889	0	7978
R4_p1-2	d38bf23d-e2d2-4d9d-affb-d07c96f27ecc	99.189	4438	15	15	1	4430	7930	3506	0	7976
R4_p1-2	722849e8-7240-4c82-97bf-6511d494c024	99.21	4433	15	17	1	4430	14589	19004	0	7974
R4_p1-2	175daaf7-2801-4d3a-85a9-1a7edc492779	99.167	4440	13	20	1	4430	12841	17266	0	7973
R4_p1-2	c4518f94-681f-4b9c-a15a-b2a9a27f98c7	99.211	4434	9	18	1	4430	22415	18004	0	7971
R4_p1-2	98f608d9-fc0f-4511-944c-22421fad983d	99.122	4443	16	18	1	4430	41352	45784	0	7967
R4_p1-2	99f867a8-f23b-4dda-8fce-07ee1ab66c46	99.1	4446	14	17	1	4430	11002	15437	0	7965
R4_p1-2	4aa762cf-04e9-4aa9-813b-620f8dce0265	99.143	4436	19	16	1	4430	15462	11040	0	7963
R4_p1-2	f46c66db-5cad-4e73-818e-d6d5d92ea0d8	99.122	4440	16	20	1	4430	8236	12662	0	7962
R4_p1-2	28ac5263-5226-4e30-9671-45f8de514991	99.166	4436	10	20	1	4430	7857	3443	0	7962
R4_p1-2	3afb1118-f5aa-4cce-a68c-32362deb747c	99.099	4439	16	24	1	4430	21206	25629	0	7954
R4_p1-2	7dc862fe-f6a0-43cb-ae4a-0a66dbc5b92e	99.099	4441	11	22	1	4430	2456	6878	0	7952
R4_p1-2	364d9fa4-6966-4f79-b111-4d8532b9a01b	99.098	4437	17	22	1	4430	13751	18171	0	7950
R4_p1-2	a4130ac3-692e-4391-ab96-1417eee4e046	99.098	4436	9	27	1	4430	985	5395	0	7941
R4_p1-2	53a17d05-49a4-48ca-9174-33bb946762e7	99.01	4446	16	22	1	4430	14659	19092	0	7941
R4_p1-2	4b80f9c3-ceb6-49d0-9d61-8b85bbd41479	99.032	4441	18	20	1	4430	35390	30964	0	7939
R4_p1-2	19d1443b-6b00-48a6-9ea5-04a406c5bfaf	99.054	4438	16	22	1	4430	1194	5613	0	7939
R4_p1-2	8ffbb8f2-e8e8-462b-9c07-12822c75364b	99.076	4436	11	22	1	4430	8132	3721	0	7938
R4_p1-2	4ffec5ec-b324-445f-9d23-f9da390aadbb	99.031	4436	20	19	1	4430	7573	3155	0	7932
R4_p1-2	b1eaf10a-269e-4985-bd66-fcc202113292	98.987	4443	17	26	1	4430	18276	13849	0	7930
R4_p1-2	18fe09fc-86f8-40af-ab3c-6466340d10bd	99.008	4437	23	17	1	4430	2142	6564	0	7930
R4_p1-2	96138d6f-ce17-4c52-8815-f8518a6ea8da	98.965	4446	14	28	1	4430	35429	39858	0	7926
R4_p1-2	ad622bc5-3057-4a2c-80e3-17963b897555	98.943	4447	18	23	1	4430	3886	8320	0	7925
R4_p1-2	62fb5d2e-7f29-4776-8ecd-751fe8cc6a25	98.942	4443	20	23	1	4430	32223	36651	0	7919
R4_p1-2	126c4d63-2878-4acd-90da-571342ddec2d	98.942	4444	14	29	1	4430	235	4659	0	7915
R4_p1-2	c4296646-1fe9-4fb9-908b-7b2337ef6a1b	98.92	4445	19	19	1	4430	6830	2400	0	7915
R4_p1-2	057c2f3a-55c4-4121-a22f-f42088e7ab78	98.942	4441	17	25	1	4430	9077	13498	0	7914
R4_p1-2	8a143d1e-4e6f-4d58-b08f-94b67c705e60	98.92	4443	19	22	1	4430	3640	8066	0	7912
R4_p1-2	3afa37f8-e8a4-45d4-90f3-edf0ac58428d	98.898	4447	15	24	1	4430	15010	19439	0	7910
R4_p1-2	ac3b7edd-56f1-4c46-8034-13e235183d18	98.941	4438	10	23	1	4430	5160	752	0	7901
R4_p1-2	a220dcec-23b6-4758-b667-bec872cf146e	98.875	4446	15	25	1	4430	2282	6708	0	7901
R4_p1-2	9760808e-c778-43c8-8450-cdb1fe47d852	98.896	4437	23	23	1	4430	2780	7197	0	7899
R4_p1-2	8f33f56b-d6bb-4134-92b0-88aa9cf9ec0e	98.874	4439	18	28	1	4430	25087	20672	0	7891
R4_p1-2	075dd507-6e0a-4f88-89fc-a9cd9045b5dc	98.851	4440	24	23	1	4430	22929	18507	0	7891
R4_p1-2	c03b924c-ba1e-4037-a10f-84dfbaf862ff	98.83	4444	18	30	1	4430	9455	13878	0	7888
R4_p1-2	251e1abf-3adb-4006-a419-01d0fab72b0e	98.808	4446	20	26	1	4430	8359	3931	0	7886
R4_p1-2	624d993b-19f4-4890-a1ad-8b9c55567c5c	98.829	4441	22	24	1	4430	26580	22159	0	7886
R4_p1-2	4e51b8e0-c673-4c0a-aeba-403a8b345bc5	98.829	4440	22	28	1	4430	11666	7247	0	7884
R4_p1-2	a0dc08bc-9ec8-471b-9625-7321ec93ac81	98.829	4441	19	28	1	4430	17728	13310	0	7882
R4_p1-2	027858db-6724-4366-bc33-91000af1e2e4	98.764	4451	19	27	1	4430	18732	23167	0	7882
R4_p1-2	13f5c922-00e8-4959-bad2-af4c684fb60d	98.872	4431	20	23	12	4430	1768	6180	0	7878
R4_p1-2	8a984d74-7513-4a51-b836-bfc57347d0db	98.807	4442	20	24	1	4430	16093	20513	0	7878
R4_p1-2	4fab5355-017a-48a8-bfb9-4b205ffd7774	98.74	4445	24	26	1	4430	7860	3433	0	7869
R4_p1-2	435f07b1-f579-49b5-a287-ba27b3cf6f3a	98.784	4439	21	25	1	4430	8796	13210	0	7867
R4_p1-2	b61f5c02-94b8-4a28-8314-3a4847d26724	98.762	4442	21	23	1	4430	19137	14718	0	7867
R4_p1-2	96df1747-9f0b-42a6-ab2a-457176a40ae5	98.761	4440	24	24	1	4430	12892	8474	0	7866
R4_p1-2	3abb92cf-d00e-46fe-b74e-4b155f5723ca	98.956	4408	16	24	35	4430	13263	17652	0	7858
R4_p1-2	0c3b8577-326d-4957-9c10-e4a001799873	98.717	4441	25	25	1	4430	43625	39206	0	7856
R4_p1-2	168c25ef-5020-4df6-91f1-ab6a4f3ac80b	98.717	4442	22	27	1	4430	23729	19311	0	7854
R4_p1-2	9ae4bc66-27c6-4de2-a621-946ed7193c4e	98.782	4434	17	17	1	4430	5556	9956	0	7854
R4_p1-2	065165e6-af03-4485-b1a1-ec1cce770e22	98.716	4438	25	24	1	4430	21057	16644	0	7851
R4_p1-2	a64cec48-354b-4c3b-ba67-b35311774b41	98.651	4449	20	36	1	4430	9491	5064	0	7847
R4_p1-2	a94edd51-8c66-4c04-87fb-a5820a3b19ba	98.694	4440	22	27	1	4430	9827	14240	0	7845
R4_p1-2	d1bf4eab-efce-49f1-b886-4b18346c20c2	98.671	4438	24	26	1	4430	5909	1499	0	7836
R4_p1-2	13c50f7d-bae2-475d-97a5-06d691b88311	98.582	4444	31	28	1	4430	1029	5454	0	7829
R4_p1-2	8b567654-b9aa-4ce1-b3a1-a4494f3268bc	98.56	4444	32	28	1	4430	4677	9102	0	7823
R4_p1-2	581f82d7-abb8-4e23-bfb5-5b1dde40b49d	98.54	4453	22	37	1	4430	11895	7463	0	7823
R4_p1-2	556f1cae-66f2-456f-ae78-14f27583f9d8	98.56	4444	28	30	1	4430	36366	31945	0	7819
R4_p1-2	b7df4aa2-7fe8-4779-912f-cbba6b699b53	98.538	4447	28	29	1	4430	9307	4881	0	7817
R4_p1-2	1aa6006e-69c8-4a74-aaa8-c1540b9d6549	98.561	4446	23	29	1	4430	4572	152	0	7817
R4_p1-2	76599e5f-ff18-4121-b2b0-7206b893988f	98.517	4450	29	29	1	4430	5946	1514	0	7817
R4_p1-2	6663c4c4-b2c7-4826-aa3a-0e78dd76808a	98.603	4437	25	28	1	4430	11158	15564	0	7816
R4_p1-2	87456e68-d771-4ee9-bacd-8239b953862f	98.582	4442	22	32	1	4430	3196	7608	0	7816
R4_p1-2	b664992e-6d4a-4ac7-820d-5b646283f7b8	98.561	4447	16	30	1	4430	22754	18339	0	7814
R4_p1-2	84e99fd3-8fb3-4680-a877-0497df55f948	98.517	4450	25	29	1	4430	14381	18809	0	7814
R4_p1-2	79039981-eecd-4cd3-9aa4-3ff9a3eedd1c	98.558	4439	28	28	1	4430	781	5192	0	7810
R4_p1-2	1861cba0-8fc1-4aba-9f62-e3b024ac05d5	98.581	4439	19	34	1	4430	17008	12605	0	7808
R4_p1-2	4c7d38d6-d61c-42eb-8265-024b0f5f7ce8	98.494	4449	27	29	1	4430	628	5055	0	7808
R4_p1-2	9fb14209-5013-497e-a8dd-d6d053a60339	98.537	4444	23	31	1	4430	16352	11937	0	7808
R4_p1-2	155359d1-ff61-4e32-a494-6949148918f5	98.47	4445	29	30	1	4430	8559	4139	0	7795
R4_p1-2	dcf357fe-2123-4d7b-b487-e3fa2e32446e	98.448	4447	29	31	1	4430	4571	148	0	7793
R4_p1-2	f35954bc-f963-4d4c-a783-5a673dc21a7c	98.383	4453	29	31	1	4430	26114	21682	0	7784
R4_p1-2	ba9f592c-c04a-4fa6-bb90-239c22138ed6	98.512	4436	19	33	2	4430	18821	14426	0	7782
R4_p1-2	c2b9ceed-0575-48a9-8610-7b90422acc2f	98.425	4444	28	32	1	4430	25445	21030	0	7781
R4_p1-2	752f1f79-3e8e-4a84-86d8-2653d1808f35	98.381	4447	32	32	1	4430	14436	10013	0	7777
R4_p1-2	d1a5aeb6-0632-4cda-8f31-8fa7d953ebe2	98.382	4450	24	38	1	4430	4758	9179	0	7775
R4_p1-2	22b200c2-aa54-434b-b9ae-088122e51fa7	98.425	4445	18	40	8	4430	4565	151	0	7773
R4_p1-2	428eede3-c3b9-4a8c-8b02-d3114fffab4a	98.38	4445	31	28	1	4430	21256	25674	0	7771
R4_p1-2	cbb36c64-0e06-4fc8-8554-6d71f13a7ca3	98.401	4439	27	26	1	4430	32916	28513	0	7764
R4_p1-2	0bf40752-d2fa-46bb-ac7a-7510b8fa2e5a	98.379	4443	25	32	1	4430	9914	14322	0	7762
R4_p1-2	8eb5240d-bd95-48f0-8bbe-d4eb3b62fe32	98.335	4445	27	39	1	4430	19408	14996	0	7755
R4_p1-2	3dfe5ccd-c611-4e7b-b55b-10d8ccffd3d4	98.312	4443	32	31	1	4430	9607	14019	0	7749
R4_p1-2	d731567f-62e2-433b-8f0a-3abd95a08ab3	98.289	4442	34	30	2	4430	5625	10037	0	7744
R4_p1-2	9aab6776-ab6e-4567-b70d-00704c50b109	98.246	4448	35	32	1	4430	5486	1064	0	7742
R4_p1-2	cdb04ad0-049c-45f3-8e2b-8bb39d62a378	98.288	4440	35	30	1	4430	6377	1969	0	7740
R4_p1-2	be77a310-3bbc-492c-9314-7c10d00cda13	98.268	4445	31	41	1	4427	5081	9497	0	7740
R4_p1-2	255e387f-b3dd-4891-8755-aaa3ccbe6141	98.246	4447	35	37	1	4430	4984	564	0	7740
R4_p1-2	f52daef8-ac30-46ba-ae0f-42e9fcf4dba7	98.204	4455	31	41	1	4430	20265	15835	0	7738
R4_p1-2	dcddc426-5159-4815-b314-0fef7d0929c0	98.183	4457	29	41	1	4430	20946	25377	0	7734
R4_p1-2	4fc1dd1a-1180-47bd-bdb1-7cc09ad1b44b	98.159	4453	29	37	1	4430	5016	9438	0	7720
R4_p1-2	9d03d25a-556c-4aa7-a682-7919b17bbf7f	98.158	4452	29	42	1	4430	2255	6675	0	7718
R4_p1-2	4e1f3c97-cd89-4be7-baf9-7b29ec081be4	98.133	4445	42	36	1	4430	10339	14757	0	7710
R4_p1-2	d13fdc15-3a18-49e2-aa96-d8bc5e18a92d	98.091	4453	36	32	1	4430	320	4746	0	7707
R4_p1-2	db24ea0a-1fc0-45e4-ae1d-2ff9d2a58d06	98.151	4436	34	34	1	4430	22756	18363	0	7694
R4_p1-2	ffacb65d-8c57-4455-847a-cd46a98507fd	98.047	4454	31	45	1	4430	18168	22589	0	7692
R4_p1-2	7a1c9d3e-5aab-4179-b309-c0fd989d4f5a	98.045	4451	31	45	1	4430	36837	32422	0	7686
R4_p1-2	066c7eb2-c473-4f40-a766-0635866ed3de	97.957	4454	48	34	1	4430	11703	7269	0	7681
R4_p1-2	cf9467a3-f561-439e-b325-07a7f7dd8caf	98.026	4458	19	46	1	4430	12753	17169	0	7681
R4_p1-2	c6226355-ea49-41dd-9a09-ac9d28337d37	98.107	4438	31	44	1	4430	4304	8696	0	7681
R4_p1-2	3faae3fd-7beb-4d01-8b5c-a3329f5cf895	98.019	4443	43	36	1	4430	8703	4293	0	7675
R4_p1-2	b3496d25-f3cd-4bcb-8561-de12a52bc183	97.976	4446	43	40	1	4430	15087	19501	0	7668
R4_p1-2	4322576b-3048-4c1d-b1b6-043c31a3d6a3	97.931	4447	32	47	1	4430	7054	2651	0	7648
R4_p1-2	309d85d7-5af2-4ac9-9838-d27987362d41	97.803	4461	45	41	1	4430	5526	1088	0	7646
R4_p1-2	7f4f0656-f33a-475c-adc3-7ad9233bec7a	97.865	4450	44	38	1	4430	5609	1191	0	7644
R4_p1-2	5debb55f-fc32-4081-8ed4-32570d3df01c	97.906	4442	37	42	1	4430	14146	9749	0	7637
R4_p1-2	248f6a9c-2848-4da3-b0bb-39f58e66daa7	97.799	4453	43	44	1	4430	4264	8684	0	7629
R4_p1-2	98e391d1-e24e-4173-ab10-86a1c8c89d01	97.822	4454	32	49	1	4430	9067	4655	0	7627
R4_p1-2	4e339a24-4297-4827-ac8d-4ad66c3370af	97.799	4452	30	43	1	4430	1462	5867	0	7616
R4_p1-2	5952349e-e165-411f-b4e2-67ef2591f50a	97.708	4450	46	42	1	4430	33482	37895	0	7601
R4_p1-2	7419a4b3-066d-4be3-a05c-aa235104173a	97.687	4453	46	48	5	4430	4847	9269	0	7600
R4_p1-2	7ffb0262-d8ad-4da8-aa14-89ec5f25ab3c	97.729	4448	39	51	1	4430	3549	7952	0	7598
R4_p1-2	b0c64944-cfac-4175-8a99-b943a77b1b07	97.706	4447	39	46	1	4430	5548	1148	0	7589
R4_p1-2	579441cd-cf09-4a1d-829f-85a8c60d47d5	97.597	4453	53	45	1	4430	19516	23937	0	7581
R4_p1-2	a7ed5557-f84c-48c5-9ea0-0e3812ee5d42	97.451	4472	39	57	1	4430	7021	2583	0	7557
R4_p1-2	3e093e4c-d361-42e8-a540-0753d8f95894	97.532	4457	40	54	1	4430	3725	8138	0	7557
R4_p1-2	f504e019-f1ca-4e83-9fc7-e43383634eb5	97.508	4455	43	48	1	4430	8624	13035	0	7550
R4_p1-2	b596ed85-7435-42e9-b4d1-2ea7d3adc2de	97.509	4456	39	50	1	4430	8453	4044	0	7548
R4_p1-2	152079fb-dd59-4333-9450-67058372b1e3	97.487	4457	42	46	1	4430	3321	7734	0	7546
R4_p1-2	a3312297-fd6a-47eb-b23c-fd67fd6df027	97.524	4443	46	49	1	4430	2671	7062	0	7537
R4_p1-2	22968cf3-6cae-4cc9-a89f-0dc45a97419e	97.31	4461	56	48	1	4430	2849	7276	0	7515
R4_p1-2	a5bd0e02-e8c6-45e8-ab32-796a740096e5	97.393	4450	44	51	1	4430	8019	3622	0	7509
R4_p1-2	bd7321d9-b1c4-42cd-bea8-dcf885923c67	97.323	4446	57	51	1	4430	5819	1420	0	7494
R4_p1-2	f7cbea40-f73a-4001-89a5-0060304efc61	97.22	4460	60	52	1	4430	1508	5933	0	7491
R4_p1-2	1e87daac-da4f-4a53-b57c-b716c5419164	97.259	4451	58	52	1	4430	2620	7027	0	7485
R4_p1-2	b29789af-d3e7-44eb-a00a-f09a3cee717a	97.213	4449	68	45	1	4430	11800	7389	0	7478
R4_p1-2	96e6c5ef-dcdc-4e2b-ae15-07ca9a69b2eb	97.215	4452	60	50	1	4430	5302	893	0	7476
R4_p1-2	735d2627-9f00-44cb-9969-002838380767	97.148	4453	61	57	1	4430	22685	27094	0	7459
R4_p1-2	31eaa49d-6c3d-4daa-b7ea-496cd610522d	97.061	4457	62	56	1	4430	8669	13083	0	7441
R4_p1-2	c7ede094-580b-4b54-a614-a7c402b79c63	97.19	4448	38	69	1	4430	34611	30233	0	7441
R4_p1-2	cbfebd67-f326-4f31-b62d-6479a26caf47	96.813	4455	66	63	1	4430	4720	317	0	7371
R4_p1-2	26c649c1-89b5-48b5-aea3-301c2030faf1	96.797	4465	54	68	1	4430	883	5293	0	7371
R4_p1-2	2ef6b2d9-9e57-4044-9788-20848cd4c98d	96.664	4467	63	69	1	4430	12711	8294	0	7345
R4_p1-2	e18504b7-4ca7-4a25-a9d9-7107496d01a9	96.802	4440	66	60	1	4430	14634	10261	0	7343
R4_p1-2	6c29b109-ca71-4b4a-b35f-10828816ebcf	96.451	4480	71	67	1	4430	35363	30922	0	7312
R4_p1-2	cee18d8d-4d95-440a-86c8-34eb3018849b	96.433	4457	74	68	1	4430	8547	4149	0	7271
R4_p1-2	4ea00eb9-98ba-4f8e-84f1-9b74532f6847	96.359	4477	59	72	1	4430	12082	16501	0	7269
R4_p1-2	757b130f-7ebb-4833-abe4-e8609d49110e	96.225	4477	66	71	1	4430	17757	13337	0	7236
R4_p1-2	d2d4761a-590f-4151-9460-72d6a176d036	96.192	4464	80	73	1	4430	20042	15635	0	7219
R4_p1-2	a8bf15e9-55e0-4f9b-a0dc-6ec56825a098	96.207	4456	90	66	1	4430	36716	32314	0	7219
R4_p1-2	8a5a15de-966e-41ff-a619-b20306c2a832	96.315	4451	61	68	1	4430	946	5314	0	7215
R4_p1-2	b3aa7af6-b9ac-41c3-baec-644ae1d5dc55	96.169	4464	65	77	1	4430	12600	8209	0	7199
R4_p1-2	122c1fad-0bee-423d-b9b3-581e5525d7de	96.062	4469	87	70	1	4430	9633	5215	0	7195
R4_p1-2	ab4233f7-839f-4c8e-8342-f63f256d2b3e	95.996	4471	80	81	1	4430	13601	9189	0	7173
R4_p1-2	cb89b7d2-8ed6-4ddc-b2d9-823f3180d545	95.929	4471	71	83	1	4430	39826	44226	0	7145
R4_p1-2	f68b2492-3bfe-4740-be4d-4b0bb770f05f	95.84	4471	82	79	1	4430	5090	9497	0	7131
R4_p1-2	91ee94cd-45eb-4bc1-bea5-4c3f9f6cb49f	95.743	4463	85	83	1	4430	11370	6980	0	7092
R4_p1-2	02b40eb3-9b1a-48e7-8344-210e1cff83e5	95.511	4478	87	86	1	4430	10575	6164	0	7051
R4_p1-2	dd7a2333-8b85-40ff-bb55-21a21c62932c	95.585	4462	73	92	1	4428	30622	34993	0	7035
R4_p1-2	28014fac-652e-43af-abae-681228b46319	95.507	4474	73	81	1	4430	8588	4199	0	7031
R4_p1-2	09d601dc-51a4-4f98-81a4-3fbacf1b0a7e	95.455	4466	88	93	1	4430	9508	5122	0	7016
R4_p1-2	1f8c23ae-9dd1-4166-aef0-d3e00b7cefd4	95.428	4462	90	83	1	4430	26479	22100	0	7005
R4_p1-2	ca087a9c-2155-43cc-92d5-32cdc837f634	95.362	4463	95	88	12	4430	7294	11688	0	6992
R4_p1-2	b4b64520-421e-4191-b12f-cb4b8c6ea638	94.652	4469	116	90	1	4430	14419	10035	0	6815
R4_p1-2	3696e983-09f1-42cd-bca4-c54561510a5a	94.442	4462	103	105	1	4430	47950	43602	0	6732
R4_p1-2	52c39500-bd87-4665-83a7-5a01d4a1d7d7	93.133	4500	146	131	1	4430	10949	6543	0	6447
R4_p1-2	b2405d68-8827-4559-8f57-f94fb4231688	92.235	4533	145	148	1	4430	18855	14427	0	6229
R4_p1-2	968f9549-f92f-49fe-874d-b8a6a88c7846	92.037	4483	174	138	1	4430	6832	2480	0	6131
R4_p1-2	ce0dae1e-4c02-4089-903a-aee558815e49	91.784	4491	181	145	1	4430	18898	14535	0	6076
R4_p1-2	15692ffb-a92b-4751-b375-3854fafb9397	91.071	4491	178	173	1	4430	4505	8833	0	5866
R4_p1-2	16e7dd72-697b-4f94-8f50-c58a486f3269	90.647	4512	199	173	1	4430	9824	5454	0	5788
R4_p1-2	57cb6570-a317-4e70-9f13-99c38d7f89f5	90.413	4506	196	189	1	4422	4608	8961	0	5710
R4_p1-2	c6a9b627-c7d3-459a-862c-b8f3509208c2	88.473	4520	244	205	10	4430	28453	24112	0	5204
R4_p2-1	81e215d3-ccf7-451d-97a8-422b7bafe6fb	99.324	4438	7	22	1	4430	3648	8070	0	8008
R4_p2-1	a079d72a-1753-4b3b-a653-d82132cdf9dd	99.301	4437	16	12	1	4430	18739	23167	0	8008
R4_p2-1	99578b6c-0f62-4a24-89dd-907107be070a	98.829	4442	24	22	1	4430	15127	10702	0	7890
R4_p2-1	279ab4b6-39c7-40a4-a8b8-42744d5f2695	98.74	4446	20	25	1	4430	18649	14224	0	7867
R4_p2-1	da51eb32-eb7c-421a-8109-d985623220f7	98.698	4454	16	26	1	4430	5552	9987	0	7866
R4_p2-1	5a007302-e578-4c84-8c50-5e19e5dca1d4	98.428	4454	21	42	1	4430	3744	8172	0	7792
R4_p2-1	9c057578-4242-40e0-aaa3-30c7a73ed88b	98.133	4445	28	49	1	4430	45953	41549	0	7697
R4_p2-1	ec53065a-0719-4435-be6f-c685f5fe0fc7	97.187	4443	52	48	1	4430	4574	192	0	7444
R4_p2-1	38641501-3359-44b9-9614-578b3982e4ff	95.49	4501	82	96	1	4430	6799	11249	0	7075
R4_p2-2	c55245ba-bf02-47aa-bdab-679ca7f54f46	99.279	4436	16	16	1	4430	14883	10458	0	8000
R4_p2-2	5ba07771-d4ce-4040-959a-86971504de48	98.964	4439	19	25	1	4430	5254	9674	0	7917
R4_p2-2	6459f972-0c25-4611-a1c1-fd417485ad32	98.873	4438	21	22	1	4430	1988	6404	0	7891
R4_p2-2	eae1975c-1ca7-45e5-9531-89aa7268ca71	98.468	4439	28	29	1	4428	18154	13745	0	7784
R4_p2-2	5cae671b-3859-4540-85f8-ec8296cea7e5	97.775	4449	50	41	1	4430	14128	18546	0	7622
R4_p2-2	b7099f8a-503e-4908-b2d3-55aaed11744b	97.17	4452	56	56	1	4430	41141	36738	0	7459
R4_p2-2	8297799a-4feb-49ba-986a-44d2506acd83	95.025	4402	126	76	1	4365	6106	10451	0	6830
R5_p1-1	f7a50958-4140-497e-8704-8fa482649305	99.556	4280	3	13	1	4276	6899	2632	0	7784
R5_p1-1	c8f7f6e8-81ee-46eb-b4bc-43706c50d97d	99.51	4283	4	13	1	4276	19188	14916	0	7777
R5_p1-1	56d6dd07-775b-4058-908f-57b731f47a1e	99.486	4279	8	12	1	4276	23031	18764	0	7768
R5_p1-1	47449bcf-e114-408d-8f69-8198d361405e	99.439	4281	11	12	1	4276	20732	25004	0	7760
R5_p1-1	45778910-d1a0-4572-a295-38fb2557994a	99.347	4290	11	14	1	4276	14907	19193	0	7751
R5_p1-1	c476dd15-ea72-412f-9376-988b5bd1b73a	99.369	4281	12	15	1	4276	17268	12998	0	7742
R5_p1-1	f1efb143-1b19-45b1-b462-cc11c0c9e624	99.369	4282	6	19	1	4276	10058	5792	0	7738
R5_p1-1	406fde5f-3b94-4363-a895-f3facf167cad	99.369	4277	10	16	1	4276	13090	8830	0	7733
R5_p1-1	efe7bbe4-b8b6-432d-8df7-2a99f88e5d3a	99.277	4289	8	16	1	4276	7510	11788	0	7727
R5_p1-1	aedcc35b-cf6a-4bf4-9e8f-0c346f873d68	99.3	4285	9	19	1	4276	4442	170	0	7727
R5_p1-1	e9fc2838-5d12-42dc-8f06-0ebe2d000240	99.322	4279	12	16	1	4276	11884	7620	0	7725
R5_p1-1	3b0afe46-7e17-4b8d-8052-23d1fade4eca	99.253	4286	10	18	1	4276	9931	5658	0	7718
R5_p1-1	b0b87215-4548-4056-9481-3e0f5cdfa160	99.207	4287	9	20	1	4276	4714	442	0	7705
R5_p1-1	327c391c-4f68-4040-aca3-5c3e60955e0f	99.138	4290	15	19	1	4276	13081	8800	0	7697
R5_p1-1	81fb754f-c971-4b9b-a50a-b733c5755b46	99.182	4281	13	15	1	4276	5543	9806	0	7692
R5_p1-1	42c4edb6-df2b-4ad8-adf3-dfd6400220c5	99.137	4289	9	20	1	4276	4645	8918	0	7690
R5_p1-1	ecff2b06-82af-4e62-ad1a-9a1fbf3d3711	99.159	4280	14	18	1	4276	10550	14811	0	7685
R5_p1-1	ed165c58-2eaf-456b-937b-ec6b603e550b	99.113	4286	16	16	1	4276	16667	20940	0	7685
R5_p1-1	80621e9a-6e23-4016-bab2-7859b35325e9	99.136	4282	15	21	1	4276	10245	5980	0	7683
R5_p1-1	7108f12a-9588-4854-b6e5-0734e0e35e7c	99.113	4282	18	17	1	4276	11723	7456	0	7679
R5_p1-1	60654aaa-ba23-49b2-8f59-22b13dbfa2dd	99.09	4285	18	19	1	4276	22123	17851	0	7677
R5_p1-1	146f4745-1f6b-43fa-a814-ef7f3328ee07	99.112	4281	12	22	1	4276	11864	16123	0	7672
R5_p1-1	d77163d6-9aca-4081-9958-5df1b055ee99	99.021	4291	16	17	1	4276	842	5121	0	7668
R5_p1-1	1d6d9dfd-3fca-4f61-a8a0-fbcbbcf5c5df	99.066	4284	12	19	1	4276	12741	8478	0	7664
R5_p1-1	bb4d36e9-6102-452f-9cf3-32de388b1241	99.02	4287	11	22	1	4276	1779	6045	0	7655
R5_p1-1	83a6d2cd-8fa9-4ba0-a401-cdfb6015365e	98.996	4285	18	20	1	4276	12177	7909	0	7651
R5_p1-1	ac8aa21e-6f55-4d3f-ae56-fa6146281efd	98.975	4291	13	24	1	4276	4150	8424	0	7651
R5_p1-1	049e27ac-5e60-4116-ac83-76e2695f13f4	99.019	4282	16	19	1	4276	32954	37215	0	7651
R5_p1-1	b2cfedf1-ce99-4b10-9e56-4bccdd3d56b0	98.996	4284	18	20	1	4276	3114	7380	0	7649
R5_p1-1	fa058910-5040-4d82-865f-2f695bff3181	98.929	4294	16	24	1	4276	22021	17740	0	7648
R5_p1-1	38ca1124-4d59-4a34-b290-c7c7ab370ed4	98.973	4285	14	24	1	4276	2084	6347	0	7642
R5_p1-1	e28b7aaa-16ea-4137-b69a-d1c602f989ad	98.996	4281	15	24	1	4276	563	4820	0	7642
R5_p1-1	47596ae5-ccf3-4d7f-a506-3901ac2b8b4d	98.949	4283	16	26	1	4276	21780	26040	0	7633
R5_p1-1	841784c9-97f4-4933-8481-c65ef8a3ec45	98.949	4283	15	23	1	4276	11697	7438	0	7633
R5_p1-1	1d0a041c-a9f3-46b0-af2c-b1ffbefc4236	98.926	4283	19	20	1	4276	2247	6509	0	7629
R5_p1-1	b583f5e6-75f0-4649-a865-11042913d00f	98.926	4282	20	25	4	4276	127	4391	0	7629
R5_p1-1	871bc732-36ff-4c4d-9f88-b3a2943c0350	98.881	4290	13	20	1	4276	1324	5592	0	7624
R5_p1-1	a1bfd091-7e9c-42bf-9035-dc5a99051de5	98.902	4280	23	20	1	4276	6698	2439	0	7622
R5_p1-1	16e95f7a-f453-48ec-9a84-a2e49f71b4b0	98.881	4288	13	25	1	4276	8964	4700	0	7620
R5_p1-1	294fb5e3-c523-4747-b476-922147a502a9	98.881	4289	9	26	1	4276	17966	13704	0	7618
R5_p1-1	4eb515b5-f273-48c6-a20a-67cc1f4fc15e	98.857	4287	19	24	1	4276	6652	10919	0	7618
R5_p1-1	dc30a57d-8c80-4ea2-ae89-74d2b9154d60	98.811	4291	24	23	1	4276	5592	9870	0	7616
R5_p1-1	f8b68bbe-fc1a-4d99-8311-f285782d62ec	98.834	4289	20	26	1	4276	12017	7746	0	7616
R5_p1-1	23aa9c36-17b6-425a-8a12-10b6259c42a3	98.856	4285	17	21	1	4276	6118	10379	0	7613
R5_p1-1	a419c422-8c87-4c8f-97c3-707295b43647	98.856	4284	18	24	1	4276	6122	10382	0	7611
R5_p1-1	1156c2d1-73a0-44f4-8e0f-6dc423c49861	98.855	4281	21	26	4	4276	32561	36821	0	7609
R5_p1-1	4440d030-4fc6-40b3-8cea-452da154d7dd	98.856	4283	17	21	1	4276	26987	22730	0	7609
R5_p1-1	c70037bc-bec8-4e02-9787-5aa99e1d26fc	98.833	4285	20	26	1	4276	8317	4054	0	7609
R5_p1-1	da1a536c-6b29-4672-8c54-f75c90f634c2	98.743	4296	24	21	1	4276	5970	1685	0	7607
R5_p1-1	ba88bcc2-d6ee-42b3-b58f-7c756859f304	98.81	4284	28	18	1	4276	4434	8702	0	7607
R5_p1-1	8c7cfdc5-2e26-484b-97dc-0f85e7c6d8fc	98.765	4291	22	25	1	4276	4938	664	0	7601
R5_p1-1	d9e992ac-a43c-40e2-9738-fa3f475254bd	98.743	4297	16	30	1	4276	8800	13079	0	7601
R5_p1-1	d9e6a942-b211-42e2-9ba3-ac3edfd1be37	98.788	4289	18	24	1	4276	5841	10108	0	7601
R5_p1-1	13a6db0e-065a-46b9-a0a6-5544ccb8249e	98.787	4288	19	23	1	4276	2983	7249	0	7600
R5_p1-1	5925db56-5bb0-40f4-8df2-552b2e285fb8	98.764	4287	24	22	1	4276	22074	26342	0	7596
R5_p1-1	d490861d-615d-4a79-96dc-9fec180be754	98.81	4287	10	23	1	4276	7513	3257	0	7596
R5_p1-1	b937108b-d839-4f4a-977a-308027e0ccc3	98.763	4283	20	23	1	4276	40118	35862	0	7585
R5_p1-1	e3b74f09-1059-4b43-ba1b-5456a6deefc7	98.717	4288	22	29	1	4276	7783	3517	0	7583
R5_p1-1	1b032d01-41b2-467b-8874-df6ebbf5d0c4	98.717	4288	18	30	1	4276	10552	6290	0	7579
R5_p1-1	24467b84-ebd8-48bd-9700-1d16e4015b6e	98.716	4284	21	23	1	4276	2231	6488	0	7576
R5_p1-1	4e664a99-0f9d-437a-9b8a-2040a76dcf02	98.717	4286	18	29	1	4276	5011	753	0	7576
R5_p1-1	bb8f5f60-911f-4448-a8ed-e76c0198024d	98.672	4292	18	31	1	4276	12046	7778	0	7574
R5_p1-1	82add78b-aa61-43f5-8939-a88d2ade9393	98.695	4290	15	33	1	4276	6374	10636	0	7574
R5_p1-1	8dbd4b9f-b25e-4584-a718-b6d2fabb8136	99.101	4227	12	19	1	4219	4209	1	0	7572
R5_p1-1	cd4efb97-76dd-40b7-b3d6-577904ab9034	98.694	4289	15	29	1	4276	4525	8785	0	7572
R5_p1-1	39fb3338-b560-4aa8-8bc8-8dce75eaf6e7	98.648	4290	23	30	1	4276	15127	19395	0	7568
R5_p1-1	f016662b-76c1-4a16-9d88-1a54805efc77	98.601	4288	31	24	1	4276	7666	11936	0	7559
R5_p1-1	1df4fa17-1bef-45ea-b590-91836cf76f94	98.623	4284	31	22	1	4276	20740	16477	0	7559
R5_p1-1	b6872a5c-0f43-4ff4-90db-a73880aa5d6a	98.624	4288	23	24	1	4276	7778	12041	0	7559
R5_p1-1	ef3d432d-5b26-48ce-82b5-62e0e50339c2	98.646	4285	21	27	1	4276	12054	7798	0	7557
R5_p1-1	84c63bf8-a6aa-40bd-a526-b0de85584f65	98.624	4287	21	26	1	4276	5758	1499	0	7555
R5_p1-1	53991d41-ed95-4876-b654-1db859fe75fc	98.646	4284	21	27	1	4276	15075	10821	0	7555
R5_p1-1	73ff35c7-32f5-461b-b265-e74ae82f12e6	98.554	4289	34	25	1	4276	10282	6009	0	7552
R5_p1-1	8d950ec0-bfa2-4321-acec-6150088cb5f0	98.533	4294	28	29	1	4276	7655	3379	0	7548
R5_p1-1	55f18175-7d1c-480f-9e86-bb5f20a4f994	98.579	4292	14	41	1	4276	3973	8233	0	7544
R5_p1-1	75aabd99-eaa7-4d14-89ba-08c1331eaf5d	98.577	4287	22	34	1	4276	6300	10558	0	7542
R5_p1-1	cb2d11ec-c930-45ff-87fa-191891cedd57	98.576	4283	27	24	1	4276	4389	134	0	7540
R5_p1-1	da9efe52-b8bc-49a9-909b-495899407b9b	98.6	4285	17	28	1	4276	15411	19661	0	7540
R5_p1-1	045d13d1-abc8-461f-82ea-88cba9273d82	98.553	4284	31	25	1	4276	6156	10416	0	7539
R5_p1-1	62171428-0dad-45ed-87ae-daf4fee35eeb	98.554	4288	14	33	1	4276	22841	27092	0	7531
R5_p1-1	210a19d4-e105-4ccb-bafa-5d0a1f888c97	98.462	4292	32	25	1	4276	6445	10718	0	7529
R5_p1-1	2ae83b19-23f7-4d0f-8489-835aa53fef12	98.509	4291	19	30	1	4276	5082	9342	0	7528
R5_p1-1	ea9f13df-ed32-4cf5-a08c-94b70503d0e0	98.415	4290	27	30	1	4276	1356	5618	0	7507
R5_p1-1	a39e5f08-0271-419b-a1e9-a58fecc8d3e4	98.371	4297	25	40	1	4276	11810	7538	0	7505
R5_p1-1	66d530ff-72c9-42c2-9b24-324fc7ccf75d	98.436	4285	25	33	1	4276	18069	13818	0	7504
R5_p1-1	4764d919-2925-403c-9f4d-cd14db3adff9	98.392	4291	22	33	1	4276	9211	4953	0	7498
R5_p1-1	971ceb8f-10ab-4f74-99b6-d7cdd8918a87	98.324	4296	31	31	4	4276	24642	28919	0	7496
R5_p1-1	0b37a4d9-07e1-4826-953d-78d462acb3b5	98.39	4287	27	32	1	4276	6523	2268	0	7496
R5_p1-1	ff96e78d-2758-45fb-94d2-0d5d9eabb238	98.325	4298	24	35	1	4276	13217	17488	0	7494
R5_p1-1	3effb393-860e-44f8-8143-f0c331e641fd	98.3	4294	33	32	1	4276	17267	12996	0	7489
R5_p1-1	08f84714-fd4e-46df-b423-36c8f3e1d863	98.838	4218	15	23	1	4211	2476	6666	0	7487
R5_p1-1	a9ebf7f7-54ac-40d3-b413-31c17924b54d	98.344	4287	28	37	1	4276	12801	17055	0	7483
R5_p1-1	8e6541dd-5cd6-41cf-8ec6-092fe14d86b7	98.343	4286	23	30	1	4276	25071	29318	0	7478
R5_p1-1	6d6bcb4e-4e87-42a2-ba97-a4f0b46c9702	98.231	4297	30	32	1	4276	25155	20884	0	7472
R5_p1-1	05fed4de-3f4d-4746-beef-68d2cecedb73	98.342	4282	25	28	1	4276	5851	10092	0	7472
R5_p1-1	3435c214-d78a-4921-8c72-66302788d79c	98.253	4294	28	32	1	4276	724	4988	0	7470
R5_p1-1	a0b74f51-0c9a-4ba5-95d2-171e3b0fca8e	98.253	4292	31	32	1	4276	18015	22278	0	7470
R5_p1-1	f828937b-740c-44cb-9cd9-ff03fbc4f75b	98.251	4289	34	24	1	4276	9983	14243	0	7467
R5_p1-1	a8284296-ed5d-442c-ab6e-8113eb18d518	98.23	4294	31	27	1	4276	15768	20034	0	7467
R5_p1-1	13f7a1b2-8ed8-4522-be46-df9a7929b2a8	98.208	4296	29	36	1	4276	13112	8845	0	7463
R5_p1-1	b4c2db85-a3a4-4200-bdc1-3f7f3a062b0b	98.251	4289	23	41	1	4276	4953	9202	0	7457
R5_p1-1	f2f660ab-53b6-421c-a9b2-5e227a777f06	98.162	4298	31	40	1	4276	32145	27874	0	7456
R5_p1-1	b1cc59cb-81d4-4735-bf66-213c2e2de38e	98.183	4292	29	43	1	4276	15626	11368	0	7448
R5_p1-1	2ed0e62a-8f77-4187-bd5d-50944a52db0f	98.203	4285	35	34	1	4276	6828	2577	0	7448
R5_p1-1	002a6796-cab4-46fd-96e5-75ceb91c523b	98.138	4296	31	33	1	4276	11529	7263	0	7444
R5_p1-1	ec2bf119-a0e8-4af9-9d67-32e5756c4499	98.181	4288	33	35	1	4276	1669	5923	0	7444
R5_p1-1	8d8f500a-9327-44f0-bb58-4f39723b9188	98.181	4288	30	38	1	4276	4624	8875	0	7443
R5_p1-1	5001c85a-187c-4967-9a30-d71600ae4e15	98.156	4285	42	33	1	4276	13597	9341	0	7441
R5_p1-1	3d2545b1-09a3-4c9e-bdd5-7b7cbd148096	98.091	4295	35	32	1	4276	8879	13145	0	7433
R5_p1-1	50b23483-7016-4af1-9237-e17e829ba8a5	98.069	4299	31	40	1	4276	7305	3036	0	7432
R5_p1-1	d99c2365-92a6-44f7-af55-6aa07782705d	98.025	4304	32	42	1	4276	11506	7228	0	7428
R5_p1-1	7c8ee8a0-b8f1-4dd4-8d6c-7e63b072760d	97.999	4298	34	43	1	4276	6333	2066	0	7413
R5_p1-1	ba19cae0-4737-4f2c-9dc4-fc8fc3f14758	98.066	4292	26	45	1	4276	13505	17755	0	7413
R5_p1-1	f700e39c-4558-4fd0-bca3-9abab2686c0f	98.042	4291	32	39	1	4276	481	4734	0	7411
R5_p1-1	455aa00e-4cae-4699-a7cd-65ca7b17c66d	98.042	4291	31	42	1	4276	926	5178	0	7409
R5_p1-1	23367b2b-b339-465e-80bb-d0d8024a6592	97.976	4299	33	41	1	4276	7657	3390	0	7408
R5_p1-1	7ccb780d-85f4-4d37-93bb-2cc42f36b698	98.021	4295	25	42	4	4276	19316	23572	0	7406
R5_p1-1	193bef28-7a78-49e8-aa61-ce2a9d934a67	98.016	4285	37	40	1	4276	10588	6343	0	7398
R5_p1-1	8457d984-6456-446a-9dbc-8c67959da158	97.862	4304	37	41	1	4276	6251	1975	0	7387
R5_p1-1	bf929370-569d-4e2a-9f95-fd2bf3cd9ce1	97.862	4304	35	45	1	4276	15985	11711	0	7385
R5_p1-1	3c20270e-1bed-4a13-beb8-0174ca9b2369	97.904	4294	38	37	1	4276	34676	38935	0	7384
R5_p1-1	9a6abde3-d406-45d8-bae0-c53ed307978e	97.86	4299	31	51	1	4276	14879	19139	0	7372
R5_p1-1	ff8256cc-2e94-4729-a8a0-6bc4a7cfa214	97.836	4298	31	45	1	4276	4411	154	0	7365
R5_p1-1	e86d76c7-e27f-416b-a864-75edfd824cc5	97.791	4300	35	44	1	4276	10246	14509	0	7360
R5_p1-1	a2348c65-1661-4ed3-ad2e-7e14c8aeb88e	97.79	4298	33	44	1	4276	8903	4646	0	7354
R5_p1-1	2f2f95a7-f656-4499-ad8e-61b76fe207bf	97.788	4295	37	41	1	4276	5665	9920	0	7352
R5_p1-1	d07896fa-1ce6-4295-b226-9153262b33e1	97.604	4299	43	44	1	4276	30656	26395	0	7313
R5_p1-1	72160aec-3be9-42d6-a4f1-1936e5e06c22	97.563	4308	32	56	1	4276	316	4582	0	7306
R5_p1-1	1f64684e-febb-4697-a628-f332176c5cd9	97.626	4296	35	47	1	4276	17235	12987	0	7306
R5_p1-1	74604b99-2c2e-4a42-8a94-616b9a7b04f4	97.446	4307	49	53	1	4276	13146	8870	0	7287
R5_p1-1	e18504b7-4ca7-4a25-a9d9-7107496d01a9	97.483	4291	38	51	1	4276	48922	53157	0	7262
R5_p1-1	7f9c4156-e304-484f-8031-274dc4c9ae38	97.441	4298	37	53	1	4276	27059	22813	0	7260
R5_p1-1	8c38e4bf-a876-4904-9861-75669368a9fe	97.229	4294	44	57	1	4276	6719	10955	0	7201
R5_p1-1	23fca18c-b8b5-415e-93d6-fb1f2bf87dd8	97.201	4287	54	54	1	4276	9734	5503	0	7191
R5_p1-1	cdf6dbf0-03c1-4acb-9260-eb6210ff09cc	97.118	4302	52	55	1	4275	24664	28920	0	7191
R5_p1-1	9f25d11e-5135-4ab1-9e27-f310858e8913	97.024	4301	53	57	1	4276	20894	16644	0	7164
R5_p1-1	2e8d9501-353b-4852-9765-c57dfaf39533	96.978	4302	36	70	1	4276	5543	1310	0	7138
R5_p1-1	2b8a53e1-4873-4225-b083-0ac2eeb0aba6	96.863	4303	54	62	1	4276	10150	5902	0	7123
R5_p1-1	facb0310-2bbc-444d-8d1c-f3a26c4c88d4	96.749	4307	54	57	1	4276	9047	13298	0	7099
R5_p1-1	b7ced34a-d29b-4966-93b7-8affd99596b6	96.768	4301	57	59	1	4276	8671	12914	0	7097
R5_p1-1	17fffa20-32ab-44d3-8efc-293d49fdd2ea	96.702	4306	51	68	1	4276	3664	7908	0	7081
R5_p1-1	f334ce4b-0d22-4dbc-a5fa-cb237eee3cf3	97.08	4247	43	56	1	4220	39801	43993	0	7081
R5_p1-1	e805d795-ffce-4403-811d-0b3d87d37df2	96.671	4295	78	60	1	4276	9506	5258	0	7079
R5_p1-1	ca847408-3b92-46b4-aacf-f63ac1dc9bf3	96.518	4308	54	73	1	4276	4816	573	0	7036
R5_p1-1	dec88412-a7a3-4377-91fd-a6265100e61a	96.447	4306	61	65	1	4276	9275	13518	0	7020
R5_p1-1	cd151f82-9b63-468e-b1a6-a3d205846028	96.215	4306	75	67	1	4276	12676	8429	0	6968
R5_p1-1	e70d6f6f-dad1-4eb7-8324-5ece79d47074	95.97	4318	68	73	1	4276	17917	13664	0	6913
R5_p1-1	01a31339-3653-41c8-b2c2-e2b329fdf04b	95.913	4306	81	66	1	4276	4174	8414	0	6889
R5_p1-1	0de54833-87d9-4d45-a44a-2f6685d4cca3	95.815	4301	89	71	7	4276	8083	3843	0	6861
R5_p1-1	7e50eaa6-a387-468d-a1e1-600347f3973d	95.714	4316	81	84	1	4276	21867	26118	0	6850
R5_p1-1	6933798a-16ec-4e01-8a44-757ffed94890	95.49	4324	91	87	1	4276	17488	13221	0	6809
R5_p1-1	d9d62b27-fc3d-4ec4-9313-e4b64951443a	95.594	4290	100	73	1	4275	12448	16663	0	6793
R5_p1-1	ffd02fc7-34b0-43e6-ae1c-4be3489e93ed	95.44	4276	76	87	38	4272	40928	36731	0	6706
R5_p1-1	495022b7-f81f-4822-a69f-3c1061763b50	95.178	4314	91	84	2	4276	19702	23937	0	6706
R5_p1-1	1c3025ec-4a19-496b-988e-a5de93f8e26e	93.332	4319	120	128	1	4276	24613	20420	0	6226
R5_p1-1	7bf553c7-1a3d-4300-9262-dc60fc128082	92.895	4335	144	120	3	4276	26839	22608	0	6148
R5_p1-1	ce3dcc42-d6f4-4879-87f9-83572fcd9a45	92.783	4337	162	121	1	4276	16106	11860	0	6135
R5_p1-1	051a4be7-0eea-49d7-9969-a03b28feb0e7	91.764	4347	178	129	2	4276	13035	17273	0	5879
R5_p1-2	9f7a40fa-10dd-4738-adf0-91190e39049a	99.556	4282	7	11	1	4276	25886	21611	0	7792
R5_p1-2	fed8abff-7db5-4ccd-90e7-24567683e54a	99.533	4283	7	9	1	4276	11705	15981	0	7786
R5_p1-2	623b4405-6f45-4585-9ca8-fa25f5979677	99.463	4282	9	10	1	4276	7041	11314	0	7768
R5_p1-2	b9422d17-5558-4027-a38f-e15dd2f5c754	99.37	4288	7	14	1	4276	9044	13323	0	7751
R5_p1-2	676d6ee2-3d90-4eda-a773-474f90239d2e	99.439	4278	7	11	1	4276	6726	10988	0	7751
R5_p1-2	70b5e0c7-85db-499c-8c88-36dc7862b36b	99.416	4280	6	16	1	4276	4910	646	0	7747
R5_p1-2	93a1a37e-a0f1-4170-b698-adde2e44667b	99.393	4281	11	11	1	4276	10851	15121	0	7747
R5_p1-2	64bbce6f-06fb-43c5-a04d-ca35e6fe2f60	99.347	4285	6	18	1	4276	6441	2170	0	7738
R5_p1-2	e3d5c288-a30a-462b-8a84-4991dc52c315	99.3	4286	15	11	1	4276	4698	8978	0	7734
R5_p1-2	7bc28fd6-ebd6-4abb-8278-980758a184e1	99.254	4289	9	13	1	4276	15352	11074	0	7721
R5_p1-2	494e8a76-a9a3-4d30-8f42-ad8d799c3e2f	99.322	4279	3	14	1	4276	22280	26535	0	7718
R5_p1-2	f5dbf0bb-f197-498a-8fe0-e83eb4d5dc1e	99.253	4285	8	19	1	4276	13682	9413	0	7714
R5_p1-2	8153a257-dd5a-4e41-9fa6-b0079b770a53	99.253	4284	8	19	1	4276	9647	5380	0	7712
R5_p1-2	f1364c9a-e674-4a3c-9ddb-92f4cc53a711	99.207	4289	13	18	1	4276	19687	23967	0	7712
R5_p1-2	602be9ee-0482-40e0-9b97-9aced860e730	99.207	4288	11	18	1	4276	12461	16737	0	7709
R5_p1-2	97b8a65d-28f6-4f82-8b85-ff13f3557ccf	99.161	4290	13	20	1	4276	1555	5835	0	7701
R5_p1-2	04df0b6c-d57a-4610-8ee5-adc4bfdb9777	99.184	4287	7	20	1	4276	8784	4515	0	7697
R5_p1-2	5ae5133a-a4bf-46b9-8eb5-73f02a9b07a2	99.205	4279	13	14	1	4276	3170	7430	0	7694
R5_p1-2	f26284c0-caec-4a70-abf5-86c09df1dc33	99.137	4287	15	19	1	4276	7204	11479	0	7692
R5_p1-2	4e7e0300-59e3-4161-b730-7cdaf627e8f7	99.16	4286	10	23	1	4276	4699	430	0	7692
R5_p1-2	511c3d67-b2c6-4474-9d88-5407f7cbffa1	99.205	4278	8	16	1	4276	25773	21520	0	7688
R5_p1-2	4a060b16-d561-4963-aec5-fd4b294291ea	99.114	4288	16	19	1	4276	28193	32470	0	7688
R5_p1-2	801c0a20-fccc-4c3e-9a48-00a2fccf9971	99.114	4288	13	15	1	4276	10000	5726	0	7685
R5_p1-2	36eee097-97ce-4e0a-afa6-b47eae998f1a	99.136	4283	13	18	1	4276	11519	7254	0	7683
R5_p1-2	17de7ea4-572c-447e-b5d3-19ab979e455a	99.068	4290	19	16	1	4276	7329	11611	0	7681
R5_p1-2	8766537c-cac5-4de8-ad21-b41c7a6d9dc6	99.113	4286	13	20	1	4276	20997	16727	0	7681
R5_p1-2	5d166415-0c29-4348-9a4c-f485eeb9e770	99.135	4279	14	17	1	4276	44479	48737	0	7675
R5_p1-2	c3a39f76-00f8-49c5-b450-fd4619f164e3	99.067	4286	18	18	1	4276	2728	7001	0	7673
R5_p1-2	e5b6a1c6-c77f-4326-b2c2-30e30d4c5582	99.067	4287	15	17	1	4276	897	5169	0	7672
R5_p1-2	71142e0b-da08-4474-86fe-1f02cf23eaaa	99.067	4287	10	21	1	4276	4458	8725	0	7668
R5_p1-2	6ab4b534-8a39-4721-a7d9-20a5b4995178	99.044	4289	14	20	1	4276	6532	2258	0	7668
R5_p1-2	48a77c10-ba1c-46ad-9677-0c73e342976f	99.089	4282	11	23	1	4276	11043	6784	0	7666
R5_p1-2	f9318470-65d2-44eb-a2e4-5fd25730988a	99.044	4288	9	23	1	4276	875	5142	0	7662
R5_p1-2	25cf9945-3033-4578-a090-db7e0231d301	99.043	4286	13	20	1	4276	896	5163	0	7662
R5_p1-2	3f565c76-d136-4f7c-9a2f-fc159c41ed71	99.021	4290	12	26	1	4276	59439	55166	0	7662
R5_p1-2	dc192c84-ba28-4458-8598-f54b1ff22eb1	99.021	4289	14	22	1	4276	2258	6531	0	7662
R5_p1-2	ef8ad35d-7fcf-46b0-ad88-85bfbb268ec9	98.998	4292	12	24	1	4276	1962	6238	0	7659
R5_p1-2	702a9200-89ac-46c6-8d6d-467dd0ffe6e6	99.019	4283	19	21	1	4276	18865	14599	0	7655
R5_p1-2	203c8547-6b8c-4b79-b3f6-45a6fb9ae531	99.134	4271	6	22	1	4264	16675	20921	0	7653
R5_p1-2	eea6cff8-7acd-4313-9afd-07d2ff228b27	98.997	4286	16	20	1	4276	11508	7240	0	7651
R5_p1-2	cf428e68-c4e4-4eb6-96eb-fb8fe1e76de5	98.973	4285	22	18	1	4276	17556	21827	0	7649
R5_p1-2	95fce188-ea2d-40ac-bead-480ccc51d946	99.019	4281	16	19	1	4276	4701	8960	0	7649
R5_p1-2	0dabc99e-9ddf-4d2f-9d16-9f6945bbf3e8	98.997	4286	11	19	1	4276	28622	32885	0	7648
R5_p1-2	533d4ec0-54bd-4abf-a67e-b57d7711d928	98.996	4284	15	19	1	4276	17941	22204	0	7648
R5_p1-2	c306463a-cd9c-467e-ba4e-73c528dcf812	98.973	4283	20	18	1	4276	4643	8908	0	7644
R5_p1-2	5698dff1-49b9-440c-8292-48bf94f9b35c	98.973	4286	10	24	1	4276	18416	22677	0	7640
R5_p1-2	8a41bd9a-9534-43b0-bb6b-7a30f7e5481a	98.926	4285	23	20	1	4276	10932	6662	0	7637
R5_p1-2	444d1d95-d603-419d-81ac-9a0f05acee37	99.018	4277	11	20	8	4276	5969	1716	0	7637
R5_p1-2	1c3e189c-c0fe-4697-ad10-ebc6ff9282ff	98.972	4280	18	21	1	4276	13012	8755	0	7637
R5_p1-2	b3f0a666-a17e-4f1a-b667-26d8dca5c430	98.949	4283	17	20	1	4276	33926	29665	0	7635
R5_p1-2	7e6c6d8e-8c4c-4798-ac08-e8c34052b326	99.017	4274	12	26	15	4276	43689	39434	0	7633
R5_p1-2	56193c7f-5165-41dd-9913-eead37cc39da	98.926	4285	19	26	1	4276	3476	7742	0	7633
R5_p1-2	8e6e39ae-593e-45b0-bd40-9a53b686cf8c	98.949	4280	18	17	1	4276	5845	10101	0	7629
R5_p1-2	40dd9520-320b-411e-93e2-4d039ddd6f01	98.881	4290	17	26	1	4276	5534	1262	0	7627
R5_p1-2	1454045f-ffcc-4c85-bd64-28864bb79269	98.926	4285	10	26	1	4276	11652	7395	0	7625
R5_p1-2	53666023-8e51-41d9-9865-18f2faa34139	98.814	4299	17	27	1	4276	14829	10542	0	7625
R5_p1-2	037c9099-8b97-41de-9200-7198415bc33c	98.814	4299	15	25	1	4276	10720	15005	0	7624
R5_p1-2	9e9722e1-38bd-4e97-a2c4-8f2186a9122c	98.857	4287	25	22	1	4276	17111	12838	0	7624
R5_p1-2	5f1102f3-a165-43b1-a5e7-8206f6cd0f59	98.881	4290	12	26	1	4276	2644	6911	0	7624
R5_p1-2	9462342a-b26f-4621-be9c-44b6d2b45331	98.88	4287	15	25	1	4276	25437	21173	0	7620
R5_p1-2	fc580917-3208-48d3-90a7-fe73dffba4a8	98.813	4295	20	24	1	4276	175	4457	0	7620
R5_p1-2	ff66e93a-37dc-45d7-bd11-a6c1295ed9ea	98.88	4287	13	27	1	4276	2161	6423	0	7618
R5_p1-2	a3abc284-f9ee-4f50-9b3c-8f96660f1614	98.834	4287	24	25	1	4276	13756	9485	0	7616
R5_p1-2	608a4cfe-a220-4356-8b78-68aef682dc28	98.813	4295	16	28	1	4276	11825	16103	0	7616
R5_p1-2	b7ccbeeb-452d-4bfc-80ee-1fec25823037	98.812	4294	17	24	1	4276	6525	2248	0	7616
R5_p1-2	1d093d8c-a050-4876-8653-ddd0cffa1999	98.834	4288	20	24	1	4276	2089	6358	0	7614
R5_p1-2	a87b9323-a8bf-4ffb-b100-f29143f26cd3	98.834	4290	16	26	1	4276	4712	8981	0	7614
R5_p1-2	89a3f523-aebd-4c84-9323-ebd72497ed20	98.879	4283	15	21	1	4276	1050	5306	0	7613
R5_p1-2	30ab92c2-ed02-40d7-ba45-0bb47b265d3f	98.811	4289	21	24	1	4276	11262	15533	0	7611
R5_p1-2	84a147a4-231c-4a43-95bc-6495e0fa2e4d	98.812	4293	14	22	1	4276	22209	17937	0	7611
R5_p1-2	890c1ace-dd7f-4fbf-bb25-f6f8c288c170	98.81	4285	27	18	1	4276	4287	18	0	7609
R5_p1-2	68d53c35-1242-426d-b6e3-c117dceeab55	98.789	4294	15	21	1	4276	1560	5834	0	7607
R5_p1-2	6cfdb209-6bc8-4abe-b39f-31795ef64f71	98.811	4290	16	24	1	4276	21728	25996	0	7607
R5_p1-2	378f4c44-f148-4c2f-85e8-e65adf1aa8fb	98.766	4294	18	24	1	4276	6975	2699	0	7603
R5_p1-2	d7e95420-7ed0-4b2a-a810-d8a3543bdae5	98.833	4286	13	24	1	4276	15755	11497	0	7603
R5_p1-2	28a37eff-d36c-4458-9526-b9702c719e25	98.787	4287	20	30	1	4276	8482	12747	0	7600
R5_p1-2	f4968474-0aac-4540-a763-265c46117472	98.854	4277	20	23	8	4276	25050	20795	0	7600
R5_p1-2	d241b1db-c649-4e30-a3ed-aee1d3573a5d	98.809	4283	21	24	1	4276	13346	17605	0	7600
R5_p1-2	f0b7f944-afd7-4c94-a526-bdd6c26f6f1e	98.718	4291	26	23	1	4276	1158	5434	0	7592
R5_p1-2	9fea7ca0-18fd-43ac-809b-0324262d68c6	98.741	4289	22	18	1	4276	12406	16675	0	7592
R5_p1-2	0529072f-8b32-4d52-8e22-9e88425b4bb0	98.764	4288	13	27	1	4276	15687	11428	0	7589
R5_p1-2	d7563482-b2f0-4369-849a-19b3232a0bdd	98.695	4291	26	25	1	4276	1416	5691	0	7587
R5_p1-2	e5dd1f27-cf68-4751-a7c1-a7e9fe22cef0	98.67	4287	23	24	1	4276	767	5030	0	7570
R5_p1-2	793af03e-4350-4284-8627-505c62b46ad0	98.693	4284	20	26	1	4276	10962	15217	0	7568
R5_p1-2	cd896a7b-8065-4571-91ab-d4695d5ce71b	98.739	4281	12	26	1	4276	22757	18514	0	7568
R5_p1-2	e79d8776-1af2-496c-bee0-e84070c74f6b	98.737	4276	21	21	8	4276	15839	11590	0	7566
R5_p1-2	df3c26c3-cebc-4423-9499-0307241fb71f	98.602	4293	24	32	1	4276	15090	19363	0	7563
R5_p1-2	33188fb7-b0ae-4b39-9f9e-151dd68a604e	98.624	4288	26	28	1	4276	12648	8382	0	7561
R5_p1-2	3f4430c8-ea52-4a63-88be-b8cc870c2965	98.602	4292	24	30	1	4276	5775	1504	0	7561
R5_p1-2	4c56aa22-b41c-4caf-af36-cab7e3ceeee6	98.625	4290	20	28	1	4276	6887	2623	0	7559
R5_p1-2	a916a13a-0e0e-4584-9d47-74e8a2b191ee	98.624	4289	22	26	1	4276	9578	5314	0	7559
R5_p1-2	6cffe6e9-4bb8-42a9-8239-6240f3e07b81	98.625	4290	18	25	1	4276	33562	37824	0	7557
R5_p1-2	18e3dc6e-c9ec-4f54-b97b-91c2cc8b8924	98.647	4288	15	29	1	4276	1178	5434	0	7557
R5_p1-2	dd4ab054-89d8-4617-b2a5-6868e779c10b	98.601	4290	24	28	1	4276	5847	10114	0	7557
R5_p1-2	0bb25630-0bed-49e2-a488-d52389003819	98.602	4293	17	25	1	4276	25593	21327	0	7555
R5_p1-2	1c7f8be7-7272-4f36-9e6c-855796b8dec2	98.624	4287	20	28	1	4276	18761	14503	0	7553
R5_p1-2	ef91f528-a5fe-4e88-a5da-67a3d6b13b15	98.578	4291	24	26	1	4276	8130	3862	0	7552
R5_p1-2	c086a5de-7c53-46c1-9c68-67d900bf3c1c	98.578	4289	24	30	1	4276	17108	12844	0	7548
R5_p1-2	9ecc1f40-f31f-4259-8cf9-40fb1af43d1e	98.554	4289	27	31	1	4276	6000	10266	0	7544
R5_p1-2	3d4b06e2-82e6-406a-9ee5-b4f7734ede5b	98.577	4286	22	23	1	4276	6975	2719	0	7540
R5_p1-2	5612a9e3-2471-4e18-aa8b-4535dff34ef0	98.533	4294	17	32	1	4276	8151	3886	0	7539
R5_p1-2	affbcef1-1977-416b-bb00-94a5b881ab16	98.532	4291	21	34	1	4276	7074	11337	0	7537
R5_p1-2	df4bb3aa-5a42-47a0-ae4c-068b722c009d	98.484	4288	35	24	1	4276	4960	691	0	7531
R5_p1-2	28ae02de-a50b-43f8-b6c1-4663c8ae4f7d	98.485	4291	27	29	1	4276	17939	22206	0	7529
R5_p1-2	8ff28df9-d217-4190-a72d-ac90b0c67ee1	98.532	4291	13	37	1	4276	21038	16783	0	7529
R5_p1-2	296062d8-6b42-437f-89eb-808b30d3ce9b	98.508	4290	23	30	1	4276	6389	2127	0	7529
R5_p1-2	bce02ebe-b119-4f97-afcf-5124f72caf97	98.442	4300	18	25	1	4276	28017	23743	0	7524
R5_p1-2	62e95885-e29f-4f20-b4f6-67a5ba2983da	98.462	4292	27	28	1	4276	10328	14596	0	7524
R5_p1-2	08c22452-48ba-4b6a-8447-7a1428dbb12e	98.439	4292	34	27	1	4276	846	5120	0	7524
R5_p1-2	1dc909df-e6d8-4b0e-8689-3a539c708ae5	98.506	4284	20	32	1	4276	24329	28576	0	7516
R5_p1-2	f72e8173-dc6e-4d40-baa5-fcb293d5da92	98.391	4288	37	22	1	4276	7338	3071	0	7507
R5_p1-2	99df4c1f-b23e-48f2-89a4-e97fcc5f9a62	98.414	4287	31	28	3	4276	20731	24993	0	7505
R5_p1-2	671afe2a-1271-4480-936e-38160f6bd3ce	98.413	4286	31	28	1	4276	37026	32768	0	7504
R5_p1-2	574b1206-6df5-4eda-a9cd-686687413bae	98.37	4295	26	29	1	4276	14107	9838	0	7504
R5_p1-2	1f58cc13-599f-4ece-aa60-b1ae6f2641c9	98.369	4291	32	31	1	4276	13826	9559	0	7502
R5_p1-2	da18f978-9483-4049-ac53-3c6b389893c0	98.345	4291	39	25	1	4276	6606	2333	0	7502
R5_p1-2	d8021c5c-6b6b-423e-8423-b6ca2f8bd539	98.39	4286	30	29	1	4276	6947	2691	0	7496
R5_p1-2	72733e7d-ebb1-4b23-a205-a793854f0bc3	98.392	4290	22	34	1	4276	2323	6579	0	7496
R5_p1-2	29c5a597-3b0b-4fd6-b7be-a49bbfd8a0d1	98.39	4287	27	30	1	4276	16280	12025	0	7496
R5_p1-2	16764a64-fc8c-4381-9f55-7421de7e0c87	98.368	4290	26	31	1	4276	14417	10158	0	7494
R5_p1-2	656e6453-f259-44c1-af0a-f29af50b8488	98.347	4296	19	32	1	4276	6028	1765	0	7492
R5_p1-2	93611116-0a4f-464d-beae-acb02e472023	98.323	4294	29	27	1	4275	14863	19132	0	7491
R5_p1-2	7f9f5d21-67ca-493a-8abc-0d871d70d7e3	98.322	4292	30	35	1	4276	1891	6156	0	7489
R5_p1-2	e2885ec9-0b5d-435f-85ca-68ced8e4c5fb	98.345	4289	29	36	1	4276	590	4849	0	7489
R5_p1-2	0b3b434b-1a6f-4788-9d6e-409b1a838d07	98.322	4291	31	31	1	4276	63047	58783	0	7487
R5_p1-2	fa1285c0-fcba-493d-8506-4912334f3b1b	98.277	4295	32	35	1	4276	8604	12875	0	7483
R5_p1-2	3e34194c-16eb-43c1-a478-d31e5782dba7	98.298	4288	35	28	1	4276	6249	1988	0	7480
R5_p1-2	70ec6115-1132-44be-b679-56e9b411f76e	98.231	4295	28	35	1	4276	23145	18880	0	7467
R5_p1-2	8eafb79e-f866-457d-9534-142f92eb2d17	98.185	4297	33	39	1	4276	10040	5768	0	7461
R5_p1-2	8aba3622-be3f-4927-b358-06dc3cb853ce	98.296	4285	22	35	1	4276	5301	9543	0	7461
R5_p1-2	659fc4ab-2343-4fe1-9a04-654043783cf8	98.271	4279	35	31	8	4276	7639	3390	0	7456
R5_p1-2	800747de-883a-4d19-aa8a-36c68096e2f2	98.206	4293	26	44	1	4276	6900	2642	0	7454
R5_p1-2	0717863c-6b58-4c28-8af6-1f35f3394fbc	98.226	4284	29	35	1	4276	12734	8490	0	7446
R5_p1-2	9f214788-0ac9-4bc7-8b9b-0e288d49ca62	98.16	4294	30	35	1	4276	42463	46725	0	7446
R5_p1-2	5bf5808b-67fb-4f56-bed3-59f073f8170e	98.162	4298	20	47	1	4276	4935	675	0	7444
R5_p1-2	bf92c8b2-fe3b-4120-954d-8d8a86ff43e6	98.023	4300	33	40	7	4276	21409	25686	0	7422
R5_p1-2	6cc331a6-136d-4db1-bf37-9224d388501b	98.022	4298	36	40	1	4276	14356	10086	0	7420
R5_p1-2	bd9356ef-74f7-47df-9292-056fcd773218	98.086	4285	35	35	1	4276	340	4586	0	7415
R5_p1-2	9815c959-3ec3-4e92-972d-fa4cb2176d87	98.065	4290	27	35	1	4276	7751	11998	0	7411
R5_p1-2	da0343cd-2f98-4ac7-9c30-bfc8f2f4f610	98.041	4288	36	35	1	4276	19414	23665	0	7409
R5_p1-2	30089fad-46c1-403f-8630-1295278c9243	97.954	4302	34	43	1	4276	10491	14764	0	7408
R5_p1-2	9de70cc8-6570-4cfe-bb67-edf0f1be4c52	98.037	4280	36	36	7	4276	7928	3687	0	7395
R5_p1-2	67a43bd5-82e7-4871-833c-3a7c4a67bd1b	97.993	4286	36	32	1	4276	1670	5915	0	7393
R5_p1-2	0dedab8f-791e-4540-a988-19f6eb2b9afb	97.925	4290	47	34	1	4276	4786	9047	0	7391
R5_p1-2	49601286-fc11-4055-8d43-886e21292feb	97.973	4291	29	45	1	4276	94131	89884	0	7389
R5_p1-2	ca797a2f-bd64-4664-a207-b0627adcb4d7	97.927	4293	36	41	1	4276	4313	57	0	7385
R5_p1-2	d4909d41-3024-46af-a20a-ce46982a5183	97.95	4293	23	31	1	4276	2061	6305	0	7380
R5_p1-2	3dd37c08-2156-4f3d-9ffa-2ea8d27ea5ce	97.883	4298	31	39	1	4276	20181	15922	0	7378
R5_p1-2	d76052aa-e001-4f12-9a1f-d52f05e9ea72	97.838	4301	36	41	1	4276	29544	33812	0	7374
R5_p1-2	b56b20e6-3893-4bf1-863a-d5edc763c75b	97.879	4291	42	39	1	4276	4513	8769	0	7374
R5_p1-2	af27e42c-8602-47ab-acc0-4687258cd535	97.924	4287	33	39	1	4276	7774	3533	0	7372
R5_p1-2	164e3e3b-bb94-47a6-b220-02ac8774b002	97.858	4295	36	40	1	4276	9172	13429	0	7371
R5_p1-2	bc51f844-a42f-47b0-b357-0735788af3aa	97.879	4290	35	38	1	4276	13378	9131	0	7367
R5_p1-2	55a5715d-262c-484a-8bcb-23f0112d5879	97.813	4298	36	41	1	4276	3532	7793	0	7363
R5_p1-2	c3ad4fad-a0cf-42e4-b33b-619e41f3ebbb	97.762	4290	49	37	1	4276	3176	7432	0	7347
R5_p1-2	6e6339c3-9c86-4879-b42e-9dade89fa93b	98.427	4195	21	34	1	4180	4165	1	0	7339
R5_p1-2	742e6e15-2c62-4c80-9221-ac373138921a	97.739	4291	46	36	1	4276	25579	21325	0	7339
R5_p1-2	654cddd2-a8fd-4d0f-9667-8fc5c902ad12	97.717	4292	41	42	1	4276	32936	28686	0	7330
R5_p1-2	2dced9ad-bdae-4947-9c9d-e8f6b3ea290f	97.736	4284	39	41	1	4276	2791	7024	0	7321
R5_p1-2	9d4db75d-d628-43e6-bc77-7018f410c977	97.672	4296	37	45	1	4276	32382	36634	0	7321
R5_p1-2	73d197e3-cd44-4b89-9fd5-be1523504f36	97.488	4300	36	54	1	4276	8122	12373	0	7276
R5_p1-2	03825936-3321-451b-80b7-c8090b8070dd	97.459	4289	45	46	1	4276	5556	1319	0	7258
R5_p1-2	87a45edc-c103-4455-922d-81c9647cef1f	97.262	4310	53	48	1	4276	7750	3472	0	7245
R5_p1-2	1cf76eb7-313d-4bdd-8988-0a3ac2274eb3	97.299	4295	50	50	1	4276	2173	6420	0	7228
R5_p1-2	576521da-66d7-46e3-b2fe-48c11a31f59e	97.252	4294	58	40	1	4276	17499	21750	0	7221
R5_p1-2	a93b3e10-36ac-4b16-9d55-880ed4e97b6d	97.057	4316	67	42	1	4276	10185	14480	0	7212
R5_p1-2	612cac86-f3d7-4a7b-ab8c-8b8e4116dac7	97.294	4287	44	51	1	4276	2592	6817	0	7208
R5_p1-2	32b428a9-4ab9-4a83-bb85-a6568d6c3902	97.028	4307	49	51	1	4276	20825	16567	0	7171
R5_p1-2	3003175b-b2bb-4da7-9896-ebfa1f25b2fe	97.144	4271	49	53	33	4276	18968	14744	0	7143
R5_p1-2	3b4750bd-5264-46f0-bc6a-6edc0e2d4a48	96.694	4326	49	62	1	4276	3454	7735	0	7110
R5_p1-2	122b4a35-d609-43c6-866e-4b0038965243	96.771	4305	61	53	1	4276	178	4433	0	7108
R5_p1-2	27b39399-5ca5-42d6-9791-b3aac50a313a	96.633	4307	58	63	1	4276	8169	3919	0	7070
R5_p1-2	73359f83-08e2-41e1-8716-00fefcc0a00c	96.326	4300	79	56	1	4276	8632	4388	0	6992
R5_p1-2	4f504a4e-d47b-420b-a40b-f6459d2fd3c0	96.066	4296	74	80	1	4276	8671	12891	0	6909
R5_p1-2	f9362e50-7f98-452b-a8ec-051aa32c7203	95.921	4315	65	83	1	4276	45359	41117	0	6890
R5_p1-2	bb6420c6-a81e-403b-abff-2a2336da58cc	96.121	4279	63	71	38	4276	6090	1875	0	6887
R5_p1-2	50af98f5-8b2d-412c-b0cd-d62f3af2319e	95.826	4312	70	87	1	4276	2747	6984	0	6865
R5_p1-2	b95aa97e-b274-4076-87eb-895db3ac45af	95.693	4319	85	81	1	4276	3056	7316	0	6852
R5_p1-2	373e54b8-c23e-4d91-9c5b-eefc5e59471b	95.675	4301	77	86	1	4276	16327	20543	0	6811
R5_p1-2	69f8b3bd-aec6-436d-959e-8f9b765aa281	95.637	4309	75	86	1	4276	1813	6041	0	6811
R5_p1-2	5feff39a-3577-48f0-b717-a4e03a48a45b	95.537	4324	75	90	1	4276	8327	4074	0	6807
R5_p1-2	54b47edf-17bc-4297-8cf9-bbc6f2cef513	95.502	4313	100	78	1	4276	17950	22205	0	6804
R5_p1-2	b6815d14-47be-404d-aa53-64a9eb5c9910	95.027	4323	100	97	1	4276	17098	12844	0	6685
R5_p1-2	f98fd6e2-8e86-4b40-a538-b626831e330b	95.045	4319	96	85	1	4276	558	4801	0	6682
R5_p1-2	c9f21ad4-169c-4248-9752-bf257f7387fb	94.76	4332	89	103	1	4276	9328	13577	0	6615
R5_p1-2	ca9177bf-07c5-4679-ab1f-8cb22c5ed4cc	94.632	4322	115	90	1	4276	15912	20162	0	6588
R5_p1-2	5df80c54-15ba-44ca-a353-708b1a30312f	94.693	4296	122	89	1	4267	6451	2233	0	6573
R5_p1-2	45d079ae-12f2-43a9-9e72-61c08ab09ca3	94.474	4325	112	98	1	4276	8974	4728	0	6545
R5_p1-2	18a9d799-6340-44f9-97a8-f21a3bf90199	94.474	4325	85	104	1	4276	1459	5678	0	6521
R5_p1-2	a32d7a33-59f4-41a7-b8be-54c096c2d224	94.168	4304	122	96	4	4276	6461	2256	0	6438
R5_p1-2	361e1dcb-55fe-4d90-89a4-1bcb38f54b3b	94.035	4325	121	107	1	4276	33057	37293	0	6431
R5_p1-2	ad28f47c-bdab-4117-b786-b915d7d86a8d	93.808	4344	100	127	7	4276	13690	9442	0	6375
R5_p1-2	93b54c6e-8d1e-4115-ac50-3b185dd01508	93.28	4345	134	122	1	4276	33746	38001	0	6261
R5_p1-2	25295bf9-8bbb-4905-8fc9-5d9f180d2d53	93.234	4316	146	119	7	4276	679	4894	0	6218
R5_p1-2	eb485111-2e5f-4728-bca2-dc7d64b2f337	90.848	4338	167	166	1	4276	17251	21420	0	5600
R5_p1-2	65c51216-a921-4d9d-9f95-05f503bbd2eb	90.686	4359	185	171	1	4276	17049	12829	0	5596
R5_p1-2	9af90448-de60-4313-93c3-67fcffd1548e	90.783	4340	165	163	1	4276	4670	8838	0	5581
R5_p1-2	a13450a1-3109-491b-a409-0d7d3102daaa	89.763	4347	195	179	1	4276	10221	14388	0	5332
R5_p1-2	c281b4d5-2262-4ce7-a2d1-6e2ab97c9ca0	85.102	4363	214	261	7	4276	15699	11680	0	4054
R5_p2-1	d9202b04-009e-4944-84aa-af33f34bc6b9	99.115	4292	14	19	1	4276	19892	15609	0	7694
R5_p2-1	a359241d-1b9a-4959-8f26-09a775455aa8	98.81	4286	20	23	1	4276	25048	29312	0	7603
R5_p2-1	f6f49ab8-7007-4a81-bb61-57e71710ff7a	98.507	4286	26	32	1	4276	1454	5711	0	7526
R5_p2-1	28a3b110-87ea-47e9-8fbe-76987e013d0b	97.461	4293	50	43	1	4276	7624	11874	0	7269
R5_p2-2	2510012f-a21a-4386-ac7e-6fb58ca012d2	98.623	4286	18	31	8	4276	20265	16004	0	7550
R6_p1-1	f3fc3706-4bfa-4f87-9f54-253759eaa87b	99.458	4245	4	12	1	4235	12917	17152	0	7694
R6_p1-1	2ea5b42a-d81e-4569-b055-a33bc37f0a7a	99.317	4243	9	17	1	4235	19116	23346	0	7657
R6_p1-1	c8983c82-650f-428d-a93d-52129eab00dd	99.34	4240	8	14	1	4235	12517	8293	0	7657
R6_p1-1	e9e3494b-023b-4ba3-bcca-ecf7312d0bec	99.176	4247	11	18	1	4235	6026	1792	0	7627
R6_p1-1	3298b14b-0f09-45eb-aba7-de54e525c21b	99.106	4250	11	18	1	4235	10265	14502	0	7613
R6_p1-1	d56b0b94-b297-4add-b9f9-37442f4c57cf	99.128	4244	13	19	1	4235	22603	18375	0	7611
R6_p1-1	58788b68-1587-4c7d-83ab-b67f89812ff6	99.083	4251	11	19	1	4235	8506	12744	0	7609
R6_p1-1	da304b24-5891-478f-8091-3d83a88f87df	99.128	4244	12	20	1	4235	24087	19860	0	7609
R6_p1-1	207b1598-9326-4e84-be2c-13ac6a576bf4	99.128	4245	10	23	1	4235	6724	2497	0	7609
R6_p1-1	02b630f3-f57f-4541-aad7-46ac733b0fd2	99.08	4241	20	15	1	4235	29963	25736	0	7598
R6_p1-1	90b5cd02-4d8f-407f-86b1-e85d0bf6ab9b	99.036	4253	9	20	1	4235	3528	7766	0	7598
R6_p1-1	c20e285d-bb5d-46ef-bf7d-463259843923	99.104	4241	9	20	1	4235	24331	28548	0	7594
R6_p1-1	d375a77e-5d23-4d9d-ad35-9e4cf5a8a008	99.058	4245	13	24	1	4235	9111	4884	0	7592
R6_p1-1	7c1af979-4b8c-4cf4-8f96-fcc439059d6a	99.104	4240	7	25	7	4235	5864	1645	0	7590
R6_p1-1	0fbed402-f543-44ca-94c0-756cfd412864	99.012	4249	13	23	1	4235	12360	8127	0	7587
R6_p1-1	7a83ef73-e87e-412f-a562-a69294a6e0e6	99.033	4240	15	19	1	4235	2013	6231	0	7579
R6_p1-1	9a9d9f0d-e933-4293-a844-c063c3fe79b1	98.965	4252	11	22	1	4235	10578	14813	0	7577
R6_p1-1	57ae7d6b-3ca8-4bab-a9eb-9f4ce5a35b02	99.055	4232	21	16	7	4235	12973	8758	0	7576
R6_p1-1	5f2e578c-4089-4116-8756-52b742d7d063	99.01	4243	12	22	1	4235	4460	8680	0	7576
R6_p1-1	ec4a322f-0659-4512-8f52-9af76d55702b	98.918	4252	14	23	1	4233	2073	6311	0	7568
R6_p1-1	d80d179a-8f47-47a5-bc58-4be8cd4b8316	99.031	4233	14	24	13	4235	26315	22100	0	7564
R6_p1-1	f6014755-2119-442a-9455-d5cff22f9027	98.963	4244	11	23	7	4235	7105	2880	0	7563
R6_p1-1	50a658ce-f88d-4a03-9cab-40709b51e0bb	98.917	4247	17	24	1	4235	8586	4357	0	7561
R6_p1-1	0885dfa7-9511-4fba-9d56-41abfb9c8590	98.916	4245	20	20	1	4235	910	5138	0	7561
R6_p1-1	c817406a-1e1f-4996-9c42-66577ab6ba7b	99.075	4214	17	17	7	4212	5423	1224	0	7546
R6_p1-1	4f2fba84-d3e8-4628-a334-082e5b78d392	99.519	4154	4	13	89	4235	21404	17260	0	7546
R6_p1-1	eab07fe1-6878-457a-b34f-5543dae7ad9e	98.847	4250	12	21	1	4235	12250	8023	0	7542
R6_p1-1	0bdc2c5f-f547-41b9-a220-78647302a0b6	98.937	4232	15	24	7	4235	21891	17687	0	7539
R6_p1-1	b7744e42-f10f-4473-b3d3-374bb368e24f	98.868	4242	14	25	1	4235	4457	243	0	7537
R6_p1-1	a31b8114-a216-4c91-8049-3a2e25c74729	98.8	4249	21	25	1	4235	1445	5677	0	7537
R6_p1-1	6ef108e9-3c07-45fb-8e23-5fe6efe57404	98.89	4236	17	22	7	4235	56645	52433	0	7535
R6_p1-1	25dfd95b-49aa-48ab-92d1-76ea8ce180df	98.801	4252	14	27	1	4235	13340	17571	0	7535
R6_p1-1	2b604bd4-fa8d-4591-819c-59a4ed2f4e7e	98.844	4240	22	23	7	4235	19036	14813	0	7533
R6_p1-1	6aed42d1-f7a9-48cf-928f-4c83324b51b0	98.799	4247	20	27	1	4235	10346	6119	0	7531
R6_p1-1	52ba296c-7ceb-4f53-b829-b639e6b434bd	98.821	4242	20	20	1	4235	4447	229	0	7529
R6_p1-1	aa788bab-6734-4d94-b5a2-48a4ebebad26	98.842	4232	27	17	1	4225	15812	11596	0	7524
R6_p1-1	fe0ceda0-8bea-4d70-8cc8-2bcd82891f6f	98.73	4253	19	25	1	4233	1482	5719	0	7522
R6_p1-1	6c3ac148-02fc-4316-bf7f-2b5a397a4f1f	98.753	4250	18	28	1	4235	16434	12205	0	7522
R6_p1-1	677fdc20-3d9e-4f8f-9f3a-976a8ec184b6	98.776	4248	14	23	1	4235	7023	11245	0	7522
R6_p1-1	d4a39693-2f78-4e42-a0e0-fd4ae6bef421	98.751	4244	24	22	2	4235	1234	5458	0	7516
R6_p1-1	c5a6cf73-fe5e-4576-9a8e-339d3271c4c3	98.752	4247	15	29	1	4235	5839	1619	0	7515
R6_p1-1	3f50f604-c4cc-4ca5-a358-ca66c1fe91ff	98.752	4246	16	27	1	4235	12391	8172	0	7513
R6_p1-1	ac63f859-1c44-4490-9f60-e21982464cea	98.707	4253	14	30	1	4235	22529	18300	0	7511
R6_p1-1	6dc3c479-01af-4c44-b9ca-0c134844e9ac	98.751	4242	19	28	1	4235	3470	7684	0	7509
R6_p1-1	bae3d908-1ed7-4201-bfa2-268e80ef6598	98.659	4251	15	28	1	4235	17887	13663	0	7496
R6_p1-1	37487058-e601-4b61-8124-cceca3e044d1	98.701	4234	25	21	17	4235	32011	27793	0	7487
R6_p1-1	3713daf2-cd78-4639-bc35-9b78b960e5fc	98.61	4244	34	24	1	4235	12142	7915	0	7487
R6_p1-1	a46eab6a-88bc-47e2-ba5f-664522572130	98.612	4250	20	31	1	4235	17849	22074	0	7485
R6_p1-1	9f55323b-0962-428b-b053-7764f8c36cae	98.634	4247	18	30	1	4235	1957	6175	0	7485
R6_p1-1	a0d575fa-d894-4b0b-ac52-c25ef21e6c95	98.656	4242	20	28	4	4235	12340	16554	0	7483
R6_p1-1	8f3e6c10-96a1-483c-9636-eabcaa54adcd	98.634	4246	16	31	1	4235	11764	7550	0	7481
R6_p1-1	e4eaf7f2-9820-4245-8484-cc907cee6a39	98.678	4236	23	28	7	4235	15942	11733	0	7481
R6_p1-1	5a448825-5e28-420a-9c6c-f633391a5787	98.543	4255	21	30	3	4235	19218	14983	0	7476
R6_p1-1	7d0c4c22-8aed-4282-b214-9d0a0e1f33e9	98.566	4253	15	34	1	4235	1074	5298	0	7474
R6_p1-1	32a6a8ee-5e92-4271-b2c7-21ce03fcf644	98.565	4251	17	33	1	4235	23527	19305	0	7472
R6_p1-1	3c4c38d8-05dc-40ff-ae90-b28775cfe4c0	98.453	4265	19	36	1	4235	841	5088	0	7467
R6_p1-1	75198203-4885-4279-94f8-0a5753ef1938	98.609	4241	17	24	1	4235	7323	11527	0	7467
R6_p1-1	4beedab2-dc2c-43ae-b2a8-59bae897d825	98.541	4249	23	32	1	4235	28169	23946	0	7467
R6_p1-1	5596fbd9-d3cc-4ac7-8978-a86aba5b747f	98.427	4260	21	35	1	4235	14067	9829	0	7454
R6_p1-1	68f76f93-a6ae-4410-a0d5-4b733dc599ba	98.493	4248	20	32	1	4235	20065	24281	0	7450
R6_p1-1	effc52ff-e747-4487-abe6-61c07017e446	98.493	4248	19	31	1	4235	22537	26752	0	7448
R6_p1-1	d044aca8-534e-49fc-a0fd-f589c4f556da	98.56	4237	15	34	7	4235	19209	15011	0	7444
R6_p1-1	36e76d99-6c4e-42da-862c-3454d7b54128	98.447	4249	20	30	1	4235	16159	11943	0	7439
R6_p1-1	2ed05686-cac2-45c5-bb0a-07340eb83ed5	98.313	4268	20	32	1	4235	17296	13048	0	7435
R6_p1-1	8a7a28c1-a6a4-4e1f-a99f-905d35642147	98.398	4246	32	31	1	4235	10667	6447	0	7432
R6_p1-1	926bb483-f829-4c5b-b649-9c7e7137df0b	98.444	4243	24	33	2	4235	6505	2296	0	7432
R6_p1-1	f5b4a4be-cb30-4314-96b2-3e5b4f2e666a	98.423	4248	21	39	1	4235	7356	3142	0	7432
R6_p1-1	93f02b3d-f6fb-43ba-9408-5fc3ef2f9b7b	98.398	4245	30	33	2	4235	5275	1058	0	7428
R6_p1-1	6ddf5f13-84a9-410e-9205-2f4a63375330	98.375	4246	35	23	1	4235	11637	7415	0	7428
R6_p1-1	61daa962-d6f7-4975-8d9d-98d89cd6a8f3	98.331	4253	34	30	1	4235	4808	575	0	7426
R6_p1-1	d9f50bc7-d6ca-467a-99ac-a360e120ca72	98.31	4260	21	34	1	4235	3916	8149	0	7420
R6_p1-1	3f64b134-d16d-43d0-9c4c-205a6381ab8e	98.331	4254	26	33	2	4235	1397	5625	0	7420
R6_p1-1	77e0b1f6-3dc1-4e3d-aa57-076733e1d2b5	98.327	4244	34	28	1	4235	19010	14795	0	7409
R6_p1-1	d1377e0d-406e-4712-a7f8-9e236d9ae76a	98.282	4250	36	28	1	4233	42371	38142	0	7409
R6_p1-1	b2283050-3ea2-4f29-b48f-4b2fa7d09237	98.305	4249	28	38	1	4235	3317	7535	0	7408
R6_p1-1	59547801-4d26-497c-b979-838adf772126	98.373	4242	20	31	1	4235	5342	1143	0	7406
R6_p1-1	1206fe07-7427-477c-9149-10719a00d25b	98.282	4248	34	31	1	4235	990	5211	0	7404
R6_p1-1	b7681c7a-bcd5-4a4e-9746-5c27e5726a6c	98.239	4260	24	34	1	4235	9177	4944	0	7404
R6_p1-1	adc48295-2024-4a6a-bebe-3b7b117dc817	98.261	4255	24	32	1	4235	1399	5623	0	7402
R6_p1-1	1de4cda4-34eb-4dfe-a427-3c18898a7f24	98.284	4253	20	41	1	4235	18157	13940	0	7400
R6_p1-1	a957c05f-f851-4b8e-bb46-bf77358c5f6b	98.237	4253	32	32	1	4235	5516	1289	0	7398
R6_p1-1	02a5e80f-eed3-4a34-bea0-f0bdd5c112db	98.192	4258	29	37	1	4235	18161	22393	0	7393
R6_p1-1	dd84bee2-f3bf-4af8-a45b-73221a2fac8f	98.213	4253	27	41	1	4235	18723	14502	0	7387
R6_p1-1	2bc3f8f7-aa2f-430c-9770-e0a4517dc55a	98.258	4248	22	35	1	4235	20648	24856	0	7387
R6_p1-1	83ae6377-38bd-4ba5-850f-bc3b6a5428e9	98.213	4254	25	42	1	4235	12499	8278	0	7387
R6_p1-1	43dd3248-ecde-49b4-a53a-a9eccc76b30d	98.143	4254	35	33	1	4235	17866	13638	0	7378
R6_p1-1	e2fa01c5-a3b8-4e2f-a777-585411ebcd19	98.122	4259	29	35	1	4235	6740	2509	0	7374
R6_p1-1	7d45147a-4907-412c-b980-b56826612f1d	98.208	4241	28	39	1	4229	12608	8404	0	7367
R6_p1-1	e6144ba6-3cd6-443a-8f0a-9b65b61f1308	98.118	4251	34	38	1	4235	13973	9753	0	7365
R6_p1-1	30134340-619c-4237-b4d3-2562a67cd469	98.072	4254	27	39	1	4235	2674	6891	0	7350
R6_p1-1	c5bcd2d3-2991-4a97-a299-9de571235fb5	98.025	4253	33	36	1	4235	5138	919	0	7341
R6_p1-1	354fe91d-35d3-4366-bd18-ca5267d58ee9	98.003	4257	27	44	1	4235	1828	6048	0	7337
R6_p1-1	1d983050-d41e-4689-8a9d-42c091c410ad	98.044	4243	36	37	7	4235	11795	7586	0	7332
R6_p1-1	50b7ec6e-6e84-4369-8f62-873f03b1acd6	97.999	4247	35	36	1	4235	32035	36243	0	7326
R6_p1-1	0a074cba-dc2e-4375-ad32-09adfa4046dd	97.912	4262	31	41	1	4235	9892	14122	0	7324
R6_p1-1	82e3cc13-97ff-49bb-b8d4-5219eb6b2c9c	97.955	4255	29	43	1	4235	10961	6745	0	7323
R6_p1-1	879a2e69-c79d-4d9b-8ac6-3eb246000a8f	97.975	4247	36	40	1	4235	15399	11191	0	7321
R6_p1-1	cb64a36b-3dfc-4a1e-99b4-e533be799f96	97.977	4251	28	39	1	4235	5397	1189	0	7321
R6_p1-1	f1c18afb-44f6-43b6-9748-f3b5de2a8c18	97.976	4248	33	40	1	4235	7646	3439	0	7319
R6_p1-1	ad366e1f-0b57-4f18-a7d2-bf32ae985708	97.93	4252	33	40	1	4235	18387	14174	0	7313
R6_p1-1	78b6f37a-1915-4abe-868d-40002fda2d6d	97.932	4255	26	49	1	4235	7005	11217	0	7313
R6_p1-1	75ef3ed3-1963-46e3-89e9-09756baa3ade	97.774	4267	33	45	1	4235	7550	3314	0	7297
R6_p1-1	c22dddab-9d1a-417b-9e72-4c33e459171d	97.817	4261	30	52	2	4235	194	4418	0	7295
R6_p1-1	78d2cd8a-5811-4083-89c5-aae264284ada	97.746	4260	43	43	1	4235	32074	27843	0	7286
R6_p1-1	b4c9b424-06fa-418b-a0d2-bc0c5722da44	97.806	4238	41	40	7	4235	5362	1168	0	7263
R6_p1-1	8c907b68-4fb9-4394-b446-ea31d08a92dd	97.763	4246	38	48	1	4235	11728	7529	0	7262
R6_p1-1	4d3e2d31-7168-46ec-a000-d4cc8b1f6784	97.628	4258	42	47	1	4235	10046	5825	0	7249
R6_p1-1	c4381915-b3bb-41ef-a4ce-390039a76823	97.65	4255	41	45	1	4235	16473	20688	0	7249
R6_p1-1	c27db0fb-54ce-42b8-88eb-af26575cba12	97.714	4244	42	45	1	4235	23074	27271	0	7249
R6_p1-1	118536a8-22a4-4db0-ba06-b89f2a84ebaf	97.625	4253	50	41	1	4235	1049	5268	0	7247
R6_p1-1	7d446ded-99b8-4d69-99b3-fede742bb787	97.529	4249	44	40	1	4235	27051	31252	0	7208
R6_p1-1	327d9423-c8c8-46ad-bd8b-79f061a85ab5	97.319	4252	56	48	1	4235	16032	20242	0	7167
R6_p1-1	68658b09-af77-46f2-a756-dbea6877d759	96.932	4270	48	55	3	4235	8580	12803	0	7083
R6_p1-1	56165f67-1332-4e6a-adf0-ed7a92f59423	96.949	4261	57	58	1	4235	6738	10951	0	7081
R6_p1-1	3199f1a3-e7fa-4d63-9209-d719539478f2	96.969	4256	60	54	3	4235	2602	6811	0	7081
R6_p1-1	4e2390a1-a670-49db-9a6b-12dfc9a15159	96.948	4259	42	63	1	4235	2164	6358	0	7064
R6_p1-1	c5d58929-395c-4dc0-90ea-8df12d26d027	96.719	4267	52	63	1	4235	6719	2509	0	7023
R6_p1-1	2fa7fc54-ca51-4527-8bb1-b63df543d779	96.462	4268	69	65	1	4235	8122	12340	0	6970
R6_p1-1	9b5eb279-e00f-42f0-963b-20a907f9f48b	96.254	4271	70	62	7	4235	4330	108	0	6918
R6_p1-1	32149712-2e20-4b7c-acc0-6d5363e96074	96.471	4251	39	68	7	4235	7147	2986	0	6916
R6_p1-1	5effcf40-ceb3-461f-91c3-97f7c5c9d486	95.902	4270	84	75	1	4235	13035	8822	0	6831
R6_p1-1	ee462d01-322d-4faa-9542-9dcd79230467	95.57	4266	91	72	5	4235	17474	21676	0	6741
R6_p1-1	83e3134f-89bf-4138-903e-10fbb76f7635	95.501	4268	75	85	1	4235	34429	30246	0	6709
R6_p1-1	944f62f0-055f-4550-9e5e-354f54f7ef4c	94.771	4284	92	86	1	4235	14591	18791	0	6549
R6_p1-1	b8f8e88c-2f5b-4c48-8702-271d32bdb47a	94.637	4289	89	94	1	4235	26930	31131	0	6516
R6_p1-1	8d8b60b2-f093-4f10-b147-5859af0fdf63	94.525	4256	109	91	7	4235	24064	19906	0	6455
R6_p1-1	74f0b046-3acb-4dc6-94a9-ba416b2319b9	92.778	4306	129	133	3	4235	8648	4452	0	6061
R6_p1-1	c57265bb-0450-4c09-a33c-c215131b0fa1	91.936	4303	183	134	1	4235	16914	21120	0	5873
R6_p1-1	5aa1014d-f6ff-48ed-aa00-ca115eb1f043	91.779	4294	158	149	5	4235	11024	6863	0	5794
R6_p1-1	a2dd3094-3098-48d0-a02e-8476db325839	91.601	4310	160	151	1	4235	11764	15946	0	5768
R6_p1-2	a81bd159-70ed-4c6f-8e3c-2407a590cfd5	99.411	4244	8	15	1	4235	4387	152	0	7683
R6_p1-2	0f682cfd-05b0-4c74-9690-3847bf847ec6	99.364	4242	5	16	1	4235	22455	18229	0	7664
R6_p1-2	d75d641e-6d66-4509-9d16-b97775f8e53a	99.292	4240	8	19	1	4235	12401	8179	0	7644
R6_p1-2	4c26b39a-5820-43cd-a834-51edf4865059	99.246	4244	13	14	1	4235	8829	13062	0	7642
R6_p1-2	88ab7721-deb1-4d96-a491-8e27adce84cf	99.153	4250	13	14	1	4235	21207	16966	0	7627
R6_p1-2	9c6be305-279d-4455-9858-1e94ea2cbad8	99.222	4243	5	18	1	4235	3825	8047	0	7627
R6_p1-2	65320765-3c23-4341-b0f1-162834372030	99.245	4239	7	16	1	4235	7149	2932	0	7627
R6_p1-2	f735e4b7-6770-4be8-97e5-6a66d7c6968e	99.198	4242	13	19	1	4235	44579	40352	0	7625
R6_p1-2	8d25a0c9-4393-486d-b095-bd85d69f046c	99.198	4240	9	21	1	4235	7954	3735	0	7618
R6_p1-2	a24ec3f4-41ff-4840-8b8b-6c08385bef53	99.105	4246	13	22	1	4235	11960	7729	0	7607
R6_p1-2	dfa3b6b1-f280-4074-892d-6c02f729b992	99.105	4244	12	23	1	4235	17411	13185	0	7603
R6_p1-2	58c88142-4ec7-4f89-a88b-57178225d1a5	99.059	4251	10	23	1	4235	5665	1429	0	7601
R6_p1-2	5616d742-4f1c-4f42-9294-a10451b7d5a6	99.036	4251	14	22	1	4235	11167	15406	0	7598
R6_p1-2	53f823d8-6512-45f6-9850-bf749d0f7158	99.058	4247	10	23	1	4235	2107	6335	0	7594
R6_p1-2	5706e6c3-3aa6-4074-a444-df170fc7aa57	99.058	4245	14	21	1	4235	5705	1477	0	7594
R6_p1-2	dfe07989-ed78-492b-8c5a-88313d59f976	99.058	4245	13	24	1	4232	3599	7829	0	7592
R6_p1-2	f34c43fd-24cb-4415-aed5-cf5e5a322e05	99.057	4240	18	18	1	4235	15052	19274	0	7589
R6_p1-2	11f0bdab-1157-4839-9e21-752f56287a32	99.01	4242	20	18	1	4235	36787	32561	0	7581
R6_p1-2	8351f277-55fc-49a8-931e-0a5588d93fee	99.033	4242	14	19	1	4235	203	4424	0	7581
R6_p1-2	9c092ae3-38dd-433f-9b3b-93ef1ea29d12	99.01	4241	17	19	1	4235	5054	833	0	7576
R6_p1-2	5034b9d4-ae3d-46d5-8784-48cb63b5aaa1	98.894	4249	19	24	1	4235	29430	25196	0	7561
R6_p1-2	75d67a97-f503-41f5-a083-6ded0f261ae0	98.939	4242	20	21	1	4235	8356	12579	0	7561
R6_p1-2	9f85c4f0-5a26-4fce-88c1-04850e41b456	98.917	4247	15	19	1	4235	12958	17185	0	7559
R6_p1-2	b09874cd-6417-47bf-b475-2179e3715e61	98.939	4243	13	21	1	4235	34123	38341	0	7557
R6_p1-2	21e4ebfa-a157-423f-9bc0-846620b0ef95	98.894	4248	16	25	1	4235	7105	2876	0	7555
R6_p1-2	caf45e6d-5828-4fec-961b-e00569e45f1c	98.94	4244	8	23	1	4235	9385	5170	0	7553
R6_p1-2	c85baf83-ffcf-4de4-bd89-1e46b4673985	98.892	4242	21	23	1	4235	29432	25210	0	7550
R6_p1-2	2de76e58-9a1a-47b8-9856-f0b5d91b0124	98.893	4246	14	26	1	4235	10262	14485	0	7550
R6_p1-2	185d4197-a88f-454f-91c1-83ad58295d34	98.87	4247	19	24	1	4235	43051	47280	0	7550
R6_p1-2	4bd4c830-abf8-4f57-903f-8694c6662c78	98.847	4249	20	22	1	4235	10562	6329	0	7548
R6_p1-2	76d15e68-33c3-449f-bced-6b16e6c51eac	98.893	4244	16	22	1	4235	12560	8339	0	7548
R6_p1-2	93c82115-5991-4be0-b917-4cfd4f8133b5	98.892	4242	15	21	1	4235	988	5204	0	7544
R6_p1-2	d5c06700-155b-4eb9-8761-c7c9127478ca	98.8	4251	15	30	1	4235	11707	7477	0	7535
R6_p1-2	156d56f2-246e-48df-8a35-7d70254a3c4f	98.822	4245	20	22	1	4235	1496	5720	0	7535
R6_p1-2	f8db4d18-4a32-4b5c-a971-75cb50e59d81	98.756	4259	13	27	1	4235	8706	12948	0	7535
R6_p1-2	6ef108e9-3c07-45fb-8e23-5fe6efe57404	98.754	4253	19	25	1	4235	28652	24416	0	7529
R6_p1-2	3d9c9e25-c123-467e-9ec7-136183994e07	98.754	4252	19	28	1	4235	6112	1878	0	7528
R6_p1-2	5d79d86b-0978-46a3-b224-aab314896665	98.73	4253	23	23	1	4235	16750	20989	0	7526
R6_p1-2	ef8e7fb9-6d27-4219-b1ce-b03a6777a134	98.798	4242	23	19	1	4235	10069	5849	0	7526
R6_p1-2	b9ffe38f-afc2-4421-8d00-dad91c098699	98.753	4250	16	28	1	4235	19639	15412	0	7520
R6_p1-2	56c35582-8ed7-4732-be4f-6ec7fc33f276	98.752	4246	17	28	1	4233	7713	3491	0	7515
R6_p1-2	affe803d-9af2-4436-b7c2-209f858cb334	98.752	4247	15	28	1	4235	787	5007	0	7515
R6_p1-2	1b6895c3-c7c5-497b-9bf1-53c33e1e6984	98.751	4245	15	24	1	4235	9340	13556	0	7511
R6_p1-2	9d811591-8af5-4c0b-a67f-6e992d7810e0	98.705	4248	19	30	1	4235	9811	5587	0	7507
R6_p1-2	4bd41bda-54c5-4512-a48f-60680d35f3f5	98.681	4245	21	27	1	4235	25279	21060	0	7496
R6_p1-2	2cd04ee2-87da-407f-bfdb-dfcca81cd09b	98.612	4251	16	31	1	4235	16521	20744	0	7483
R6_p1-2	0e3bfdf1-e31f-457c-a97b-fe4132a6e774	98.633	4242	25	29	1	4232	1009	5227	0	7481
R6_p1-2	d21483a7-b3f9-430e-9d2a-8bd4892f06a5	98.611	4247	22	31	4	4235	32685	28461	0	7481
R6_p1-2	3f65577e-3bff-4073-bcd7-53897d595d75	98.565	4251	18	35	1	4235	690	4913	0	7472
R6_p1-2	46dde4d4-5cfe-4d48-9964-b0a753732491	98.541	4250	24	31	1	4235	6245	10471	0	7470
R6_p1-2	f2fa21fb-8efe-4194-8d63-d7df4a3b16ef	98.608	4238	23	26	1	4232	5062	9269	0	7467
R6_p1-2	81bcf77d-c472-4e36-b2b5-afa6f50c4fe9	98.54	4246	22	32	1	4235	10216	14432	0	7461
R6_p1-2	c539b91c-5907-4478-89a6-559b371c8c1c	98.54	4248	18	30	1	4235	2116	6332	0	7461
R6_p1-2	bab07233-6444-48ee-b723-3347344bc7d2	98.539	4243	28	27	1	4235	26612	22396	0	7461
R6_p1-2	3ed16c8c-fb74-45d0-ad2c-d8819d42d75c	98.494	4250	20	34	1	4235	33053	37273	0	7454
R6_p1-2	09465407-4dd5-4444-ba03-1dcce4f81426	98.494	4251	17	31	1	4235	6844	2625	0	7452
R6_p1-2	9aca4546-d761-4798-b04a-f2b0c31c7846	98.47	4247	31	25	1	4235	6973	11197	0	7452
R6_p1-2	eb975227-f099-4a4b-a671-5e9d5ba8bc93	98.493	4247	22	23	1	4235	14096	18312	0	7450
R6_p1-2	cf82e745-e30c-421a-a9e4-a43680ee70dd	98.448	4252	26	33	1	4235	14431	10203	0	7450
R6_p1-2	3769f1c4-59fd-4d04-adec-84ac43154c71	98.492	4243	30	26	1	4235	1534	5750	0	7450
R6_p1-2	9c0d049f-8f17-47b6-8082-1963bcd8d218	98.47	4249	24	31	1	4235	5355	1134	0	7448
R6_p1-2	9b677230-0e46-471d-b0ee-8a0a6e1b2c0f	98.493	4248	18	28	1	4235	9022	4808	0	7448
R6_p1-2	990df172-e369-45e8-af1f-5ea6b6511a9a	98.426	4256	22	40	1	4235	4344	8575	0	7446
R6_p1-2	c6fd025f-d786-404c-9764-c2f8effa9a99	98.423	4249	29	27	1	4235	8880	13104	0	7441
R6_p1-2	cf7312d3-fdc2-4a01-89f6-2c0b4512cf4b	98.377	4252	27	31	1	4235	6050	1824	0	7432
R6_p1-2	f9f1253f-b1e2-40e8-af5b-1b282e26ec1e	98.354	4252	33	26	1	4235	9360	5129	0	7430
R6_p1-2	1fd4e7c0-e8ba-405d-901b-8beac6f8cd8c	98.445	4244	20	31	1	4235	6894	11100	0	7430
R6_p1-2	5c2b4e39-9a43-4ba3-afe9-d9fb5808832b	98.422	4247	20	34	1	4235	18924	14713	0	7428
R6_p1-2	17006afb-a027-4138-9ca8-2e762daca011	98.353	4251	30	32	1	4235	7688	3462	0	7426
R6_p1-2	2ab18d85-dc8d-4305-90db-0c0e141cfbfd	98.354	4253	27	32	1	4235	2219	6446	0	7426
R6_p1-2	23f76f4b-0c07-4f8f-9a2e-f56cc3548a91	98.377	4252	20	38	1	4235	10453	14672	0	7424
R6_p1-2	ca4c2d89-ca13-4993-835e-6f89f19bdb8c	98.33	4251	25	33	1	4235	2293	6513	0	7415
R6_p1-2	c8cdd684-b64f-465c-9f04-c3f4dd96ea87	98.351	4245	30	30	1	4235	17896	22110	0	7415
R6_p1-2	2da00bb9-e45f-4e28-88b1-178f14d90159	98.284	4255	30	38	1	4235	5008	777	0	7413
R6_p1-2	322afa4a-7e55-42ee-bedf-275d7eaf683e	98.24	4261	28	32	1	4235	31846	27607	0	7409
R6_p1-2	5586aa39-1a86-4c7c-b4e5-740df01b819b	98.238	4256	31	40	1	4235	18175	13943	0	7404
R6_p1-2	2db6f554-28da-4299-b25e-0714c747f492	98.212	4250	34	35	1	4235	29334	25112	0	7389
R6_p1-2	bd537b2a-309a-43ee-90fb-9cd4e17824cc	98.146	4262	29	30	1	4235	9841	5603	0	7387
R6_p1-2	e713af90-f377-42aa-8589-684f66a31b6e	98.165	4250	43	31	1	4235	948	5177	0	7384
R6_p1-2	5a9f1a41-dc3b-4f0f-b206-03043ba1e8d6	98.19	4254	27	36	1	4235	10018	14240	0	7384
R6_p1-2	a52ee064-46c1-4a8e-8107-4a22a52ef61d	98.096	4254	33	39	1	4235	6266	10490	0	7363
R6_p1-2	ca43a0af-7f24-43e6-88df-0919d1ed1fc2	98.116	4247	32	39	1	4235	9722	5512	0	7356
R6_p1-2	c9b6e723-3977-40b1-9ab0-e1a73314f3b9	98.006	4263	29	41	1	4235	5097	9331	0	7350
R6_p1-2	17611d6f-4dc0-4f55-9128-38ae9407e9f6	97.963	4271	28	39	1	4235	6378	2131	0	7350
R6_p1-2	15143ce0-f38e-4346-b6d0-7db5838e4529	98.048	4252	35	35	1	4235	17588	21808	0	7348
R6_p1-2	db8d024f-7972-477f-9276-a47faced8ef5	97.977	4252	39	34	1	4235	30720	26499	0	7332
R6_p1-2	06d004c0-3261-4b0f-8088-dd000d8ab0de	98.002	4254	24	46	1	4235	6987	2776	0	7328
R6_p1-2	d8f3c072-a1cc-46bb-bea5-f6a3da693111	98.262	4200	29	37	1	4183	4173	1	0	7312
R6_p1-2	0e86a6eb-b1f3-44dc-9159-0681a24ef72c	97.861	4254	39	41	1	4235	12086	7866	0	7304
R6_p1-2	569a295c-8f37-4ff0-9c8b-f250a80ce836	97.794	4262	41	46	1	4235	2504	6739	0	7300
R6_p1-2	09dd2c9e-1ca0-43f7-a0e4-a4052cf13fe6	97.99	4228	31	33	15	4235	1103	5283	0	7287
R6_p1-2	f77943d5-52e5-4ad5-95e9-51fb7637bc1c	97.834	4247	42	32	1	4235	1130	5338	0	7287
R6_p1-2	338e787f-40c5-4751-ae41-fc9acd882583	97.897	4233	36	39	20	4235	1729	5925	0	7275
R6_p1-2	646034bd-8fae-4ede-ac08-f366d3c9c1fd	97.743	4253	38	48	1	4235	25759	21547	0	7269
R6_p1-2	a9c2b7ef-9236-41ff-ad3d-65825433789d	97.655	4264	37	47	1	4235	28644	32873	0	7262
R6_p1-2	bd0b0025-e296-40b0-9724-777fc592fb36	97.52	4274	44	52	1	4235	5275	1025	0	7249
R6_p1-2	963a5267-d04e-4eb7-829e-8c9dc1b1e31b	97.626	4255	38	44	1	4235	12559	16770	0	7239
R6_p1-2	0296d8f4-518d-4829-b61a-c557bda1c067	97.997	4194	32	43	1	4180	4156	1	0	7232
R6_p1-2	d7f785b8-f72c-494a-aad9-aba70e67ace9	97.602	4254	29	50	1	4235	2251	6450	0	7223
R6_p1-2	28ee2ff0-d6d9-453b-84ed-202158318304	97.483	4251	42	44	1	4233	14957	10754	0	7197
R6_p1-2	a373ac37-6e6a-4c89-9b38-40b07d26c6d1	97.322	4257	48	51	1	4235	7927	3715	0	7169
R6_p1-2	f489bdf8-70c9-4c30-981a-9e69ade89156	97.272	4252	50	48	1	4235	6176	1974	0	7149
R6_p1-2	901d66b5-0b0f-44f2-90d1-ac90100c0840	97.188	4268	44	54	1	4235	7618	11842	0	7147
R6_p1-2	d680e4bc-ce41-4f33-9754-0ef4fbfc7400	97.294	4250	43	57	1	4235	15681	19873	0	7145
R6_p1-2	813dd4ec-4f04-433d-acf7-5e31c7861722	97.187	4266	37	65	1	4235	3523	7736	0	7136
R6_p1-2	e264f313-908f-4d44-8e4b-8f0cb644c3ac	97.019	4261	50	58	1	4235	8839	4630	0	7094
R6_p1-2	dd548f92-c849-40f9-9da3-16ac2988bfee	96.968	4254	57	54	1	4235	9005	13205	0	7075
R6_p1-2	217416e4-e851-49c5-94a2-634a2a0765f0	96.924	4259	60	58	1	4235	23905	19694	0	7073
R6_p1-2	9781d257-4e97-4039-8863-16fa66fce15f	96.879	4261	58	57	3	4235	838	5051	0	7062
R6_p1-2	812e649b-76e2-43c4-88d3-72f26fd65ae0	96.96	4243	48	54	1	4235	17657	21826	0	7046
R6_p1-2	3199f1a3-e7fa-4d63-9209-d719539478f2	97.382	4164	42	53	3	4141	30554	34675	0	7023
R6_p1-2	4038bbd6-3d65-492a-acf9-fa8e0c2f6c6e	96.624	4266	60	60	1	4235	7196	11408	0	7003
R6_p1-2	103c542b-ddfc-475a-b9ac-efc194bd680f	96.641	4257	71	56	1	4235	7580	11786	0	7003
R6_p1-2	f7551a0c-1b1c-49ce-aa11-2e5eeacd3329	96.71	4255	46	65	1	4235	1440	5620	0	6996
R6_p1-2	5cdf69cb-4be2-4b10-addf-3f004042f6fd	96.64	4256	63	61	1	4235	14752	18948	0	6994
R6_p1-2	e456cc5b-4fe4-4b36-9dba-9ac7957bf1bd	96.511	4270	66	69	1	4235	5641	1420	0	6983
R6_p1-2	26469f3a-8ed8-41d5-820e-394f5a4a1922	96.327	4247	62	67	1	4235	7025	2861	0	6892
R6_p1-2	3bbcb562-86c2-4ba7-a355-3af73c2f3b74	95.971	4269	80	73	1	4235	8169	3959	0	6846
R6_p1-2	1516903f-47e2-47fb-9f8f-7e37990240e9	95.825	4263	70	84	1	4228	4738	8927	0	6787
R6_p1-2	f3f54d36-59ea-4369-9149-5c7bdd53b914	95.039	4273	93	86	1	4235	9401	5210	0	6606
R6_p1-2	b22532f7-2943-448e-9270-1bed886ee71a	95.014	4272	85	102	1	4235	27594	31774	0	6591
R6_p1-2	edb047d4-f136-40f0-8592-079d0ba9502d	94.749	4266	88	96	1	4235	8003	12163	0	6512
R6_p1-2	e7481f42-77e1-4b39-8c37-ee46bf3826bd	94.402	4287	94	112	4	4235	1364	5559	0	6453
R6_p1-2	1f45352e-c61f-4e26-96da-3efd058bbc48	94.193	4271	107	103	1	4235	7385	11550	0	6383
R6_p1-2	461820c4-04bf-45a6-91a0-ff7f219f86a3	93.588	4289	122	129	1	4235	4561	372	0	6255
R6_p1-2	9e310a5d-b5e0-49b9-b308-12ffe8352cd2	92.982	4303	116	122	1	4235	14422	18606	0	6102
R6_p2-2	b9818e2d-82cf-4a26-bdf4-34289ec29940	98.846	4246	16	24	1	4235	9729	5506	0	7539
R6_p2-2	1a6c31d3-5470-4934-81db-5f9580c4e61f	98.682	4248	13	30	1	4235	19922	24139	0	7494
R8_p1-1	20a5918a-599b-4194-aaf4-46b7918eee7a	99.455	4224	6	13	1	4213	42649	46866	0	7657
R8_p1-1	b3145e43-18c3-4b6f-a472-ec6c4a22f52f	99.455	4222	10	13	1	4213	4979	9196	0	7657
R8_p1-1	307c9b42-476c-4170-ab36-f73e4005f7ae	99.478	4217	8	12	4	4213	5372	1163	0	7653
R8_p1-1	e05ee5d3-fe4b-4a13-888e-9ead19f279b7	99.431	4220	11	12	1	4213	5736	9949	0	7648
R8_p1-1	88cc84d7-bc87-40e4-b4b1-9a3b2e805725	99.384	4223	9	15	1	4213	53783	57998	0	7638
R8_p1-1	2b23fb18-ad68-4862-b722-6c8d445bf1de	99.431	4217	4	15	1	4213	14887	10687	0	7637
R8_p1-1	e91ea70a-42ea-4a32-937c-a7c2f2d732fe	99.313	4221	14	14	1	4213	7990	3777	0	7620
R8_p1-1	f9e965a0-9d74-4211-bfeb-1fae64b88cd2	99.266	4223	10	15	1	4213	7217	3006	0	7607
R8_p1-1	73eacf07-e049-4b31-bf7b-876c839db876	99.265	4217	15	11	1	4213	9409	13613	0	7601
R8_p1-1	b743b05d-5a22-46eb-8dfa-cfaa1d3603b1	99.242	4223	8	17	1	4213	3964	8172	0	7600
R8_p1-1	aceb06e8-1bf6-4183-8794-71ed4226ae85	99.265	4218	10	20	1	4213	19765	15564	0	7598
R8_p1-1	b141ef09-e222-4f48-97ed-87221c4b29be	99.242	4223	6	20	1	4213	28154	23948	0	7598
R8_p1-1	eec90588-b1de-480c-bde8-1f80a2d403d5	99.242	4219	11	16	1	4213	39861	35658	0	7594
R8_p1-1	05e49ad2-2d3a-4075-b8b1-eebd3d292729	99.194	4220	12	19	1	4213	31079	26875	0	7585
R8_p1-1	37f17803-5c5c-45c9-80ac-835b3c53cb2f	99.148	4226	13	22	1	4213	15062	10847	0	7583
R8_p1-1	5c3c7a22-a3b1-49f2-9632-28766889f57a	99.217	4217	8	17	1	4213	13598	17793	0	7581
R8_p1-1	bbd6c8fa-9668-4f5a-8133-8f8341dbfa51	99.148	4223	16	17	1	4213	6059	10271	0	7581
R8_p1-1	320ee838-4f22-4376-aa36-28f7c297fa09	99.123	4220	17	17	1	4213	25176	20970	0	7570
R8_p1-1	739619f3-d6d3-47a1-9bc1-91e4a4004a57	99.1	4221	19	11	1	4213	22111	26320	0	7566
R8_p1-1	e5481c37-ce9d-4a62-92cb-6939502886de	99.146	4216	15	12	1	4213	7275	11472	0	7566
R8_p1-1	90515317-90df-478c-8148-154c75699b2c	99.121	4208	20	15	1	4202	17405	21601	0	7550
R8_p1-1	149dd8d8-7ae0-424e-81ed-062d3589129f	99.006	4225	18	17	1	4213	6743	2531	0	7548
R8_p1-1	ed184541-90de-4c0e-a95a-d9f1cad2c2c3	99.006	4225	18	19	1	4213	22489	18277	0	7548
R8_p1-1	8a686f2f-d088-417e-83b4-43b9bd6fdf99	99.007	4228	11	21	1	4213	11363	7152	0	7546
R8_p1-1	3083bf58-ca01-4b9f-a98c-b4015fedca06	99.028	4219	22	16	1	4213	28149	32354	0	7546
R8_p1-1	f1c228f0-659c-4cc6-9d1b-e890d6d633d8	98.982	4226	16	20	1	4213	4679	8890	0	7540
R8_p1-1	c41e0f35-c504-4251-a6ea-7291712bea4d	99.005	4221	18	15	1	4213	5316	9520	0	7540
R8_p1-1	46ad8950-3c7c-4cd2-a274-1cb281cb1e05	99.028	4220	12	25	1	4213	8778	12975	0	7539
R8_p1-1	2d417b1e-62a9-48f7-b173-dec05afcfe4b	99.005	4219	15	17	1	4213	33650	37847	0	7533
R8_p1-1	cdf3cadc-a5e5-407d-b43f-1c03aea03173	98.959	4227	13	23	1	4213	3394	7603	0	7533
R8_p1-1	100b97a6-70e0-4662-9aab-32289f050daf	98.981	4221	17	22	1	4213	19315	15113	0	7533
R8_p1-1	136ef87f-c6e9-498a-8d03-d8f8a289b323	98.912	4228	18	22	1	4213	7014	2800	0	7528
R8_p1-1	c30d6380-1957-4914-8bf7-df4b0809bbf6	98.935	4225	15	24	1	4213	12911	8705	0	7526
R8_p1-1	51513056-0208-4433-b07b-6cfd13ca6c0b	98.912	4227	18	23	1	4213	2394	6606	0	7526
R8_p1-1	0ea5ee84-b01f-42c6-8bae-dc81f3638eee	98.958	4222	14	24	1	4213	11547	7347	0	7526
R8_p1-1	4449437b-57dc-47f0-bdd7-e4ebae97a7ae	98.889	4229	19	23	1	4213	15873	20089	0	7524
R8_p1-1	88f93618-456f-4df0-acdd-a7142868113e	98.911	4224	22	18	1	4213	5153	943	0	7524
R8_p1-1	2855e079-aff8-4674-8f4e-3db4e8fa5695	98.911	4224	17	23	1	4213	1171	5376	0	7518
R8_p1-1	97bd6404-8a7c-435d-9d1f-a362aceb40c8	98.888	4227	18	22	1	4213	5149	938	0	7518
R8_p1-1	44443480-2ef3-4fb3-bebd-43c13a9651c4	98.864	4225	22	22	1	4213	9208	4998	0	7513
R8_p1-1	db704f85-5a5e-40fe-bb1c-c7fec3f7839d	98.91	4221	17	19	1	4213	20332	24531	0	7513
R8_p1-1	079fcb89-d716-448d-a6a1-229f71cc4fdd	98.887	4223	18	18	1	4213	9822	5619	0	7511
R8_p1-1	2a24d943-bbd3-4f85-ba38-1fb2eef86fe5	98.865	4228	14	25	1	4213	19898	15690	0	7511
R8_p1-1	d38dd417-b833-4d7c-bcf6-55bd04e64298	98.864	4227	9	23	1	4213	1329	5530	0	7504
R8_p1-1	d3b0bd3f-dd5a-4192-9bda-b5fa98c5d7a8	98.839	4221	21	21	1	4213	4674	474	0	7498
R8_p1-1	01d03119-18fc-44c6-a20c-6c757d1ed4b6	98.908	4213	16	19	10	4213	6101	1910	0	7498
R8_p1-1	7fedc79b-1366-479f-a77b-f110c7c4b245	98.794	4228	18	27	1	4213	7321	3112	0	7494
R8_p1-1	1bd4bc42-b477-4147-930a-9fbb743dc7b9	98.771	4231	19	19	1	4213	5558	1343	0	7494
R8_p1-1	4a8f3c62-f2e9-48e3-84a1-e25eacfb59b5	98.77	4227	23	23	1	4213	7940	3729	0	7491
R8_p1-1	54c52311-2ac1-4c47-8cbd-73e8042288df	98.816	4224	13	34	1	4213	29226	25029	0	7489
R8_p1-1	449539ea-b14a-4979-b3a6-55c159502b05	98.793	4225	12	26	1	4213	22559	18362	0	7483
R8_p1-1	64428a1a-2ef1-4762-ab00-71763c0b907e	98.723	4230	23	27	1	4213	6836	2621	0	7483
R8_p1-1	cf84cbc4-1476-478d-9e27-5c882c452be6	98.746	4225	23	22	1	4213	950	5156	0	7481
R8_p1-1	41440b25-9316-4cd6-9b50-1905ff9d3ab1	98.746	4225	21	29	1	4213	996	5200	0	7480
R8_p1-1	a24f6d74-6db8-4fb7-b42a-c7c8ea0b1f59	98.768	4221	23	23	1	4213	7390	3191	0	7480
R8_p1-1	93288f4e-5f6c-4a67-9223-dc31fedebc17	98.768	4222	18	29	1	4213	27329	23133	0	7478
R8_p1-1	27846d1c-366a-4e95-8c30-ffa73b5df2ed	98.722	4227	23	23	1	4213	7273	3064	0	7478
R8_p1-1	3b2e3106-7184-4f8e-abe6-0f0e58c20695	98.769	4223	15	28	1	4213	4885	690	0	7476
R8_p1-1	e6c19a2b-2bf2-435f-8c40-55369d0b0823	98.768	4220	19	24	1	4213	6465	10658	0	7474
R8_p1-1	4f16e655-cb1f-4ecf-931e-b48a205a4f08	98.699	4228	19	29	1	4213	5153	9359	0	7470
R8_p1-1	4a87cc7b-e26c-4473-8371-154463930aa1	98.746	4225	8	31	1	4213	24156	19965	0	7467
R8_p1-1	d54f3e52-7ca7-4a8e-9f60-6bf0cc875508	98.698	4225	20	30	1	4209	17745	13540	0	7465
R8_p1-1	2243c9d9-5e70-4a13-b46b-e35457886b77	98.653	4233	13	33	1	4213	11463	7255	0	7461
R8_p1-1	3bf3435a-a22c-4cdf-a55a-0a0764c5135c	98.674	4224	23	27	1	4213	9342	5141	0	7459
R8_p1-1	5d5a9078-8290-40a5-b6ae-5e68a9a6b8ba	98.628	4226	30	24	1	4213	27421	23211	0	7457
R8_p1-1	471a7e1a-b8f9-4bf9-96f6-373a2af8ed31	98.743	4216	16	26	1	4207	14276	18463	0	7457
R8_p1-1	a1c9b501-6ef3-4875-bc6b-88ba25881611	98.652	4228	17	27	1	4213	8524	12726	0	7456
R8_p1-1	3ec7245c-2535-417e-b8e6-31b4d27d79ac	98.651	4224	18	26	1	4213	35611	31416	0	7448
R8_p1-1	785da762-3847-4349-8826-b2b17b7060a6	98.604	4225	27	26	1	4213	13810	18014	0	7446
R8_p1-1	62601940-72ad-45ce-a5ef-ba915900990e	98.581	4229	24	22	1	4213	19999	24207	0	7444
R8_p1-1	cc63647b-509f-4ca3-8d78-259f257fbad8	98.581	4229	23	31	1	4213	13192	17399	0	7443
R8_p1-1	7ded0d61-7033-4580-8530-ce1c3927dd33	98.627	4225	15	32	1	4213	12998	8805	0	7441
R8_p1-1	ebdd62a9-2b47-426d-a3b6-a5e5a6684db4	98.58	4226	27	27	1	4213	12418	8213	0	7441
R8_p1-1	55df8958-aeae-4116-b10b-1ddfcded6242	98.58	4226	25	30	1	4213	7002	11205	0	7439
R8_p1-1	c6594dd7-95e2-4482-9271-7e9c3025cf63	98.581	4228	17	34	1	4213	4622	8821	0	7435
R8_p1-1	3cfb01fc-be28-490d-98cc-a5ab23aab700	98.558	4229	22	28	1	4213	11924	16129	0	7435
R8_p1-1	88b8a952-e122-4a06-a9ac-e6a971b030fc	98.602	4220	24	26	1	4213	5128	937	0	7433
R8_p1-1	f77a3049-e00b-48b3-bc1d-d6f7ea7115c5	98.558	4230	18	24	1	4213	1399	5602	0	7433
R8_p1-1	4025d3c2-a696-483f-81f4-42afacf3fbee	98.49	4238	22	31	1	4213	52863	48643	0	7433
R8_p1-1	cbf8802c-cebd-4fce-bff2-ddfb9be3273f	98.602	4221	22	26	1	4213	2789	6980	0	7433
R8_p1-1	79dde0c4-ae60-4fc2-92c6-62b8db9c4f4a	98.556	4224	21	28	1	4213	3475	7669	0	7426
R8_p1-1	af7a993d-08f6-4948-8996-a76e5b51e422	98.51	4229	25	33	1	4213	33804	38010	0	7426
R8_p1-1	2947674d-2723-431f-88a0-c7a2a05d65eb	98.556	4223	21	30	1	4206	14985	10786	0	7424
R8_p1-1	72f795a8-4779-49a3-a7d8-67d653f81ec2	98.509	4226	26	30	1	4213	9458	5257	0	7420
R8_p1-1	210a63c5-82a7-4a3c-96d3-7f30f0cdfe09	98.463	4228	28	32	1	4213	32085	36290	0	7413
R8_p1-1	d373e888-b564-4b89-b2f8-ebf4f132e279	98.418	4235	25	35	1	4213	8836	13050	0	7411
R8_p1-1	0ae4b6da-80e5-456b-ac5c-1c2ef2d07d03	99.129	4133	12	18	93	4213	7785	3665	0	7411
R8_p1-1	32b42044-718c-444b-8aed-35a6eedf662e	98.395	4237	25	32	1	4213	14568	18785	0	7408
R8_p1-1	00cc4584-8522-4e5d-83c6-76826957ae49	98.372	4239	25	24	1	4213	30006	25786	0	7406
R8_p1-1	15aeca54-24e2-4cad-8553-2ea5fd72b1b1	98.416	4231	27	36	1	4213	5752	1544	0	7406
R8_p1-1	8077fe72-2ce2-4b10-a1f1-fed927444edb	98.439	4229	20	35	1	4213	14927	10729	0	7402
R8_p1-1	8369b1c8-b799-4b7d-acf6-9d5e5641deb6	98.395	4237	18	35	1	4213	10756	14966	0	7402
R8_p1-1	e5ffd16f-705c-4ad7-aec0-39410989dfbb	98.437	4222	32	29	1	4213	1762	5958	0	7400
R8_p1-1	571f7e0b-6bbf-4526-89ce-e2f696e38f83	98.417	4232	20	35	1	4213	18552	14349	0	7400
R8_p1-1	89b4aea8-161c-4cd1-8e1f-ae106951ed52	98.438	4225	24	27	1	4213	16991	12797	0	7398
R8_p1-1	9b746003-1ea9-41d0-aa7d-ff3038908cea	98.46	4222	24	30	1	4213	24829	29018	0	7398
R8_p1-1	d9c0b186-e106-4189-91b1-7bab9979e4a8	98.438	4225	25	32	1	4213	14367	18562	0	7398
R8_p1-1	783d0b0f-45d8-4054-a440-1634df24e143	98.438	4226	18	32	1	4213	11881	7691	0	7395
R8_p1-1	3c945e87-131a-4f59-829f-50354084b7a9	98.369	4230	32	26	1	4213	13037	17246	0	7395
R8_p1-1	4b75faf0-e7ce-496b-bcec-6ddfddde7e40	98.323	4233	27	30	1	4213	19007	14799	0	7384
R8_p1-1	0e0dc1d1-2434-474a-ad1d-86124fb7ad14	98.413	4221	23	28	1	4213	12351	16535	0	7384
R8_p1-1	08a6278b-2940-42fe-ac81-b63e3aeac9a5	98.368	4228	20	33	1	4213	9190	13383	0	7380
R8_p1-1	74c7cb5b-1854-437c-8720-7d74791933f1	98.279	4241	22	38	1	4213	8476	12693	0	7380
R8_p1-1	a97fa035-89a4-429b-9c6d-58ca86d8ae4d	98.321	4229	30	33	1	4213	4572	369	0	7378
R8_p1-1	39f6eb65-1ca4-4dbb-9929-6c4a7cd6cf5e	98.319	4224	28	38	1	4213	35	4226	0	7367
R8_p1-1	7c96feb9-53c9-42b8-b8f1-eb2ea783c3ce	98.295	4223	32	27	1	4213	10840	15032	0	7363
R8_p1-1	254760ad-151a-4b33-a52d-cf89b491a919	98.274	4230	26	35	1	4213	3691	7890	0	7363
R8_p1-1	7bff3619-32fa-4e36-8677-53fa407dbaea	98.225	4225	38	27	1	4213	5468	9667	0	7352
R8_p1-1	2bf214dd-a454-4994-8c8f-77a769ca542f	98.228	4232	21	39	1	4213	11027	15223	0	7350
R8_p1-1	de7891b2-1518-4584-a001-67c7f251d046	98.202	4227	37	29	1	4213	27147	31348	0	7348
R8_p1-1	57af9922-0100-440f-9421-e0ba86b5d6f8	98.182	4235	28	39	1	4213	5050	843	0	7348
R8_p1-1	66149897-164a-42ab-b89f-fa2bd34a7abd	98.27	4220	25	34	1	4213	7993	12171	0	7345
R8_p1-1	d6e8f338-15f6-4507-86aa-77c87c4ee2fb	98.18	4231	31	37	1	4213	5635	1433	0	7345
R8_p1-1	e8c2694d-6a52-4622-aade-743005be786a	98.178	4227	31	26	1	4213	39148	43342	0	7337
R8_p1-1	fd7e26e6-d7b7-4474-b543-7eaf4a06b132	98.224	4222	28	35	1	4213	2689	6872	0	7337
R8_p1-1	4db514dd-ecc8-4abb-92b4-4cb480babae8	98.112	4238	31	43	1	4213	4549	8762	0	7337
R8_p1-1	a4f8219a-d199-4225-98d6-1587fa400cc1	98.178	4226	31	30	1	4213	16766	12574	0	7336
R8_p1-1	f1c2465a-3e45-4cf2-8fd9-fb21c50015d3	98.199	4221	30	34	1	4213	11036	6854	0	7332
R8_p1-1	27ca69a9-1095-4258-90ba-6e32868564f3	98.177	4224	31	35	1	4213	25231	21043	0	7332
R8_p1-1	e4c60a94-f555-41fd-b704-18f99b812e96	98.091	4242	20	43	1	4213	2069	6278	0	7328
R8_p1-1	b677c53d-b3e3-43e9-b937-d4be873234a7	98.109	4230	36	41	1	4213	20522	16320	0	7328
R8_p1-1	46d4b124-8b09-44ab-97fd-1892e3796a3a	98.107	4225	38	36	1	4213	9579	5385	0	7321
R8_p1-1	3352c90f-934d-480c-9659-ece2324b65ac	98.127	4218	37	30	1	4213	47475	51655	0	7313
R8_p1-1	894bca55-8558-4bf4-9242-ec81d0756a8f	98.038	4231	30	43	1	4213	15604	11409	0	7304
R8_p1-1	9ffda323-c810-4e09-a487-77cac32353c0	98.058	4223	37	34	1	4213	11539	15726	0	7302
R8_p1-1	27c5c9ff-3be1-44ff-b45b-8317dc8e33b5	97.944	4232	44	36	1	4213	19547	15340	0	7293
R8_p1-1	9c67a1a6-e0c5-4361-834e-b394fe5fc3c5	97.97	4236	27	44	1	4213	15911	20110	0	7291
R8_p1-1	b751d55a-3b79-4306-a0ff-b7e3757bd99d	97.924	4239	35	37	1	4213	3030	7241	0	7291
R8_p1-1	3c8486a4-af5e-448a-8c71-cd6728a81165	98.011	4223	35	34	1	4203	5809	1616	0	7287
R8_p1-1	83e19b00-901c-4fb3-9694-936bea2ae329	97.943	4230	39	39	1	4213	33212	29014	0	7286
R8_p1-1	b97954b3-6a41-470a-9848-4893243383e7	97.986	4221	35	34	1	4213	26135	21957	0	7278
R8_p1-1	cf72d47f-faa5-41ac-9518-36ffb2515c4f	97.94	4223	36	40	1	4213	806	4987	0	7269
R8_p1-1	91678437-d86c-4172-8671-8a751b561785	97.898	4234	28	41	1	4213	11863	16056	0	7269
R8_p1-1	6d065423-b937-4cf2-a5d2-40aaf01c79f5	97.871	4227	44	36	1	4213	872	5066	0	7265
R8_p1-1	7e30ddfd-9072-482d-b170-b462ec0f8c3e	97.961	4217	30	27	1	4213	14172	18336	0	7260
R8_p1-1	39baeac7-d843-492f-b219-ef0d6086ee3f	97.803	4234	44	39	1	4213	7892	3687	0	7258
R8_p1-1	8bd58c86-3abd-4e7d-bf17-182a8e874ad6	97.782	4239	32	44	1	4213	6573	2371	0	7251
R8_p1-1	c0a87090-0ac6-432b-b0f4-9d777ded03a7	97.756	4234	44	36	1	4213	2189	6392	0	7245
R8_p1-1	55199e73-5abd-4052-8527-130c8783b4db	97.711	4237	43	40	1	4213	4838	632	0	7238
R8_p1-1	e0280689-4002-4a49-919f-3d6fb3f09848	97.71	4235	44	39	1	4213	5546	1343	0	7234
R8_p1-1	97798c49-412d-4900-be5b-ab19e14fc026	97.73	4230	45	40	1	4213	6959	2764	0	7232
R8_p1-1	b2433b25-bb99-4507-8c81-bf8b94161067	97.731	4231	36	38	1	4213	785	4973	0	7227
R8_p1-1	b1339f54-c5d1-4d66-92a4-947f0fb3bc61	97.684	4231	36	46	1	4213	12523	16709	0	7214
R8_p1-1	20a6a3a9-dd13-4f59-8fb2-5e2ebdcd94a7	97.595	4242	38	48	1	4213	6592	2386	0	7210
R8_p1-1	49bcd6ff-c8ad-45f4-ae39-518207fb6c4c	97.662	4234	28	51	1	4213	18892	14709	0	7204
R8_p1-1	086d4d61-5fbf-4e0a-86af-f044414b852a	97.452	4239	50	53	1	4213	5239	1033	0	7177
R8_p1-1	69815941-660e-4b91-bec8-62270563b8ce	97.518	4231	44	48	1	4213	13037	17224	0	7175
R8_p1-1	80fedfdf-f1aa-4205-8d10-4a0fec0e1c84	97.405	4239	41	49	1	4213	9096	4901	0	7155
R8_p1-1	414d0a54-c686-4b3b-9e66-867c735b9c5b	97.421	4226	48	52	1	4213	22350	26527	0	7143
R8_p1-1	6a69b86e-7bc1-4577-9cb8-effa62bc3d3b	97.401	4233	39	49	1	4213	1339	5520	0	7142
R8_p1-1	88d4882d-b192-464d-81da-f010e1d00d21	97.42	4224	46	49	1	4213	18777	14606	0	7138
R8_p1-1	188d1aef-5364-4d0a-a34a-808b7d6dda4a	97.355	4234	46	46	1	4213	17591	13403	0	7138
R8_p1-1	50b281c7-f208-47ff-ba99-0a27193a4d8e	97.422	4228	35	48	1	4213	7786	3618	0	7136
R8_p1-1	342f5890-ec25-4a4f-abd3-141415926354	97.373	4225	49	45	1	4213	6605	10779	0	7131
R8_p1-1	92624f00-1155-4577-8224-63c4ad503418	97.282	4231	58	43	1	4213	5284	1093	0	7123
R8_p1-1	191b7790-d3d4-42d8-8fa4-a5efd0d96224	97.236	4233	50	47	1	4213	9494	5309	0	7107
R8_p1-1	9a06231b-22f9-4a66-a2e3-4e29031b7f1b	96.983	4242	50	58	1	4213	4250	58	0	7053
R8_p1-1	b5c81ec6-ea59-408e-a5a4-cb3fec52e3d4	96.998	4231	40	58	10	4213	14194	18364	0	7029
R8_p1-1	bf9cce52-2293-43e2-84ee-a7dd6d11f5a9	96.752	4249	61	66	1	4213	21594	17387	0	7011
R8_p1-1	231c707e-4ebb-4e1c-9dd3-15ff574cae6a	96.707	4251	54	57	2	4213	22563	26766	0	6996
R8_p1-1	591a76ff-d28e-4819-935d-e3912c20303a	96.678	4244	55	69	1	4213	9866	5678	0	6977
R8_p1-1	9ba7d40e-c9b1-49d2-922b-edc2222f2413	96.716	4232	65	53	1	4213	11184	7008	0	6977
R8_p1-1	d365f302-06e1-4026-8eac-243d73bdeafa	96.466	4245	59	73	1	4213	15547	11362	0	6924
R8_p1-1	690ee1a6-4459-4e1a-b9b8-c3aa416bfc5b	96.34	4235	75	65	1	4213	15380	11204	0	6889
R8_p1-1	e4a9a335-79c7-44f9-aef5-7bc672db4701	96.408	4232	53	76	1	4213	7407	3256	0	6881
R8_p1-1	ea4e2c86-cb6c-47d1-9e2b-612e370341f8	96.108	4240	62	69	1	4213	6242	10405	0	6820
R8_p1-1	0c6b86b7-93da-4531-afc7-1cfba2a1f2fc	96.019	4220	67	69	20	4213	2938	7082	0	6769
R8_p1-1	670bb479-c518-47a1-8a0b-6b773f543207	95.664	4244	81	80	1	4213	8802	4631	0	6722
R8_p1-1	2b1abe83-018d-4493-abd2-6b7b4996ee65	95.595	4245	85	87	1	4213	8458	4284	0	6709
R8_p1-1	ead018b7-bc56-40a0-ada6-45ecb5b0d845	95.524	4245	84	79	1	4213	12444	8274	0	6689
R8_p1-1	12665e3f-89e9-4226-ae42-bef3eb4b7aac	95.088	4255	87	92	1	4213	29829	34003	0	6588
R8_p1-1	636116f2-0aaa-40f2-8af8-409658c080fe	94.861	4281	83	93	1	4213	5286	1075	0	6560
R8_p1-1	ca90c63c-5f9b-402d-a670-053e641ea312	94.574	4239	107	96	19	4213	20359	24518	0	6440
R8_p1-1	a5963ecc-a2c1-499f-8914-a35b7e86b63b	93.968	4277	100	108	1	4213	7410	3228	0	6324
R8_p1-1	7642d9f6-48f5-4fc2-a843-31f116d55ae0	93.806	4262	79	121	1	4209	26311	22182	0	6237
R8_p1-1	4c324110-2ce4-4392-9412-ec3900e25d2f	93.404	4275	139	107	11	4213	24100	19897	0	6200
R8_p1-1	72b4e52a-c76b-42eb-9865-946247f34ad0	93.021	4284	122	139	1	4213	5967	1790	0	6091
R8_p1-1	3f55e138-a755-4546-a031-508ead12b90d	93.038	4266	141	120	1	4213	1523	5685	0	6089
R8_p1-1	fba6ca38-f37e-4007-889c-8a89c0f8ab5a	92.459	4270	150	126	1	4213	9424	5270	0	5943
R8_p1-1	431a337e-add4-463e-a20f-776d47191e21	91.334	4281	132	171	1	4213	49964	45855	0	5629
R8_p1-1	c27ee9e0-f023-47e4-8741-7188fcb802a4	90.347	4299	193	171	1	4213	12174	8012	0	5435
R8_p1-1	02cce35f-288c-4c8d-a13e-c8296d618f87	89.902	4278	226	166	1	4213	11089	6953	0	5317
R8_p1-1	4115c48e-768e-4b33-98ea-e86dedf16649	88.959	4302	225	195	1	4213	5479	9619	0	5083
R8_p1-1	173ba2f1-7f46-4e7d-bc36-35285acbc8a5	86.832	4283	251	221	1	4213	30865	26826	0	4495
R8_p1-2	74fa56ce-6b4f-4e40-8752-b6cc012edfd2	99.526	4221	4	12	1	4213	15666	11454	0	7670
R8_p1-2	853c660e-0bb1-40d7-930c-c54a22fcb478	99.384	4219	3	19	1	4213	34352	30151	0	7625
R8_p1-2	34fedee1-e02f-422c-8025-117c66976f93	99.29	4223	15	12	1	4213	11346	7129	0	7618
R8_p1-2	080f29f6-b596-4f26-a7e4-1975a5075732	99.266	4223	12	15	1	4213	20794	16581	0	7609
R8_p1-2	2e37776a-440b-4211-9d8a-2964e85c973a	99.266	4221	8	20	1	4213	12961	8756	0	7601
R8_p1-2	7f0ee43f-0f2b-445f-bb25-a0fa0bc9e4f4	99.194	4219	20	14	1	4213	7237	11447	0	7590
R8_p1-2	2eb203eb-be61-4b82-bedc-78e60152aab6	99.218	4219	11	15	1	4213	3869	8071	0	7589
R8_p1-2	8f65e466-a039-45d8-bc21-3e930decd98b	99.194	4220	10	18	1	4213	6750	2548	0	7583
R8_p1-2	810ae2c3-5a25-4466-b361-e52d8c6576b0	99.171	4220	15	13	1	4213	18053	13847	0	7581
R8_p1-2	d1695b8f-0e54-4ef9-87c7-2219bff9e62b	99.101	4227	16	17	1	4213	14168	18386	0	7576
R8_p1-2	baba4d07-b7f7-40ad-bae6-22102dafc590	99.123	4220	14	17	1	4213	18246	14043	0	7566
R8_p1-2	fad93d0a-81e3-467f-b703-206299dd25d4	99.1	4224	12	21	1	4213	822	5030	0	7566
R8_p1-2	e535def0-0529-4214-9b53-c46efd0f1928	99.1	4224	9	21	1	4213	8161	12366	0	7563
R8_p1-2	000fbd61-330f-4691-9fab-51672a704f26	99.122	4216	11	21	1	4213	13532	9340	0	7557
R8_p1-2	36d72784-27cc-418f-ab07-9bf050ee169a	99.052	4220	18	18	1	4213	5417	9621	0	7552
R8_p1-2	3fdfbf9e-12a9-4bf3-8372-d875a66afce7	99.03	4225	16	17	1	4213	7213	3002	0	7552
R8_p1-2	5e6bd8d9-7823-4c90-9c82-47d143adbe05	99.075	4217	17	17	1	4213	7989	12187	0	7552
R8_p1-2	ddc0a9f6-1779-4a2d-929f-673fd45cf5a4	98.984	4232	11	26	1	4213	1438	5656	0	7548
R8_p1-2	8d65dc82-f347-42ad-8f4b-959d8ad4c527	99.029	4223	13	22	1	4213	15921	11717	0	7546
R8_p1-2	5f444287-bb77-4abc-bcd5-46dcfc8ed053	98.96	4231	18	20	1	4213	13106	17328	0	7546
R8_p1-2	c381aa5e-b554-49bd-a083-f58d2c633fc3	99.03	4226	7	24	1	4213	10085	5881	0	7546
R8_p1-2	1ac61826-fcf6-402d-b6b2-655419f04102	99.004	4218	24	17	1	4213	5529	9733	0	7540
R8_p1-2	6c9ce286-41b2-47fd-88f6-ce8e1e0a3cde	99.028	4219	16	22	1	4213	36109	31910	0	7540
R8_p1-2	965292d9-185a-4a18-a79b-86f2fe88f832	98.959	4228	15	20	1	4213	3953	8166	0	7537
R8_p1-2	93f8a462-b08f-4b18-9a96-fd342b7a5c9a	99.004	4215	22	14	1	4213	27175	31371	0	7533
R8_p1-2	a40b0ab8-bd2a-4365-ba0a-313756418ef0	98.957	4220	25	19	1	4213	2141	6348	0	7531
R8_p1-2	3421b34e-0681-42f4-818f-03f89a9212c4	98.958	4221	21	18	1	4213	7422	11627	0	7529
R8_p1-2	99eb0441-4797-412a-8caf-84502f6641f3	98.912	4227	18	24	1	4213	9262	13474	0	7526
R8_p1-2	f1aa67e8-ffdd-4191-9a57-bcc0f4517d5d	98.913	4230	13	28	1	4213	16087	20300	0	7526
R8_p1-2	ad96d55b-b18a-4731-b53f-e4e7b09b2538	98.958	4221	12	26	1	4213	6430	2234	0	7522
R8_p1-2	ecc11601-5350-4705-a74e-00d9d50b1674	98.935	4226	10	26	1	4213	9895	14098	0	7522
R8_p1-2	0509db0f-2b3d-4dcb-8d52-898870233f14	98.866	4233	14	26	1	4213	7144	11362	0	7520
R8_p1-2	7ba5444e-9f40-478f-a5c0-871a8753ed75	98.911	4225	14	20	1	4213	19400	23604	0	7518
R8_p1-2	4c3be49b-dcbf-4c63-a95c-208cea1a64b6	98.911	4223	16	22	1	4213	5001	9203	0	7516
R8_p1-2	0c79c209-4891-4d8e-b6e5-655101210b90	98.888	4227	12	25	1	4213	10474	14679	0	7513
R8_p1-2	0b46220c-1957-4de5-8bed-b8dc1253035c	98.796	4237	17	29	1	4213	16980	12754	0	7511
R8_p1-2	59bbae9e-3c36-4da2-a53a-a6a84bdb4f35	98.887	4221	16	20	1	4213	6763	10960	0	7505
R8_p1-2	9c767768-dff0-45e0-be71-b438ec0a4d53	98.91	4220	11	24	1	4213	5852	1661	0	7505
R8_p1-2	348c5325-92a6-4038-b916-6108f04bd1d0	98.839	4222	24	22	1	4213	1392	5597	0	7502
R8_p1-2	e4dff1ea-708a-4ebd-bafe-0919ef6eb810	98.84	4225	17	27	1	4213	19130	14926	0	7502
R8_p1-2	ae6396c1-4786-4f4a-947a-76994d0950a2	98.84	4223	18	26	1	4213	7802	3601	0	7498
R8_p1-2	af812d47-9591-4596-9435-de806959566c	98.749	4236	18	28	1	4213	8656	12879	0	7496
R8_p1-2	9327da70-c54d-4a56-bdce-dfb9323cd989	98.771	4230	20	25	1	4213	1067	5281	0	7494
R8_p1-2	e0725263-61c1-4f9f-a1b3-9bb80cae96b4	98.84	4223	13	29	1	4213	48238	44042	0	7494
R8_p1-2	d12d7345-42bc-4658-96ff-147ef2a47cb5	98.839	4220	14	22	1	4213	7216	3025	0	7489
R8_p1-2	4dbdf510-60dc-4b38-afb8-9c32624fb499	98.746	4227	26	22	1	4213	2027	6240	0	7487
R8_p1-2	e324550f-2e1d-4a3f-a028-48c08bd8ec96	98.747	4230	18	30	1	4213	7237	11448	0	7485
R8_p1-2	74726ea2-db40-4252-8aee-e8c08bc9af46	98.791	4219	26	23	1	4213	5489	1290	0	7485
R8_p1-2	2af9a52c-5661-4a9c-8d97-c3cd0b1be707	98.747	4229	16	30	1	4213	6785	10992	0	7481
R8_p1-2	87d2ce65-5c66-4984-b09c-c4f647c15acd	98.769	4224	18	26	1	4213	3155	7355	0	7481
R8_p1-2	274c7c0e-bfbd-4dc2-a4ac-4ad74d0ec8c2	98.7	4231	24	26	1	4213	13829	9612	0	7480
R8_p1-2	4478219f-13e5-41fe-b815-760b104fd116	98.724	4231	14	33	1	4213	4569	8777	0	7478
R8_p1-2	f20728b7-e3b5-48c4-9e9a-d8d224d2d27a	98.722	4225	26	25	1	4213	6734	2526	0	7478
R8_p1-2	d63dd782-c979-4810-9760-d9fe2742c3ad	98.745	4223	24	25	1	4213	4064	8267	0	7478
R8_p1-2	d01eb9f4-7f61-414b-bc09-060009259b1f	98.746	4226	14	31	1	4213	10674	14873	0	7474
R8_p1-2	4b0e0d0f-f7e0-44be-95eb-834ec65a8012	98.768	4222	14	31	1	4213	6282	10474	0	7474
R8_p1-2	fef88c1f-bf7f-46cb-ad2f-05ad30bc588b	98.699	4229	19	26	1	4213	8574	4366	0	7472
R8_p1-2	a2c20401-789a-404d-bf1c-17cd96b93635	98.744	4220	19	27	1	4213	14618	18810	0	7468
R8_p1-2	1937dd82-a543-4a75-bfeb-2a4542b6f6c3	98.722	4224	19	29	1	4213	12084	7885	0	7468
R8_p1-2	973d8e0f-8c31-47b5-a9e3-0827b536ed41	98.631	4237	20	33	1	4213	5271	1049	0	7468
R8_p1-2	715f3d93-ee5d-4132-b679-fa66a841a21b	98.63	4233	23	27	1	4213	11252	7035	0	7463
R8_p1-2	ea96354c-f243-4fc9-9053-ae4b94f3b59c	98.697	4220	24	26	1	4213	17144	21339	0	7459
R8_p1-2	cff7da2d-13a0-46ca-ab74-c50f31a7b0ee	98.629	4229	26	28	1	4213	2520	6732	0	7459
R8_p1-2	65c4b711-e15c-4476-a1ad-1f5d5942d5b0	98.628	4228	24	28	1	4213	6065	1857	0	7456
R8_p1-2	529afa0e-977f-4523-8df8-c528fc41a939	98.697	4221	16	26	1	4213	54853	59042	0	7454
R8_p1-2	42d07fcf-b2c8-4823-8638-11b469a8f46a	98.605	4230	24	21	1	4213	9179	13390	0	7452
R8_p1-2	a33108d3-20cb-44fa-96c3-2507f1099bd0	98.583	4235	21	23	1	4213	11837	16054	0	7452
R8_p1-2	c6a3b0c9-9a87-49d3-8e6d-a9bc58e24aad	98.628	4227	21	33	1	4213	5227	1024	0	7450
R8_p1-2	5b0f5fd7-2e05-406b-81f4-95192f52b826	98.583	4233	21	29	1	4213	45449	49662	0	7448
R8_p1-2	894a7f1b-46b4-48ef-890c-d4328e628c83	98.673	4220	19	31	1	4213	4983	9172	0	7448
R8_p1-2	c5ffa144-c4c1-41f0-bc4d-93710302350d	98.604	4226	21	32	1	4213	11747	15947	0	7443
R8_p1-2	fc64317e-ba19-4581-bccd-c0504e653c20	98.603	4222	28	27	1	4213	9997	14196	0	7441
R8_p1-2	cb80febc-351d-4f9f-9031-f5d5ca5fcc9f	98.58	4226	21	31	1	4213	30135	25936	0	7435
R8_p1-2	af22bd22-5f24-4abc-9076-6f0cf2502660	99.061	4154	9	23	70	4213	34098	29965	0	7428
R8_p1-2	c3da8eda-73b2-4bb8-871c-36d154ec74ed	98.509	4225	34	24	1	4213	28761	32968	0	7426
R8_p1-2	917ca36d-494f-43c4-bfed-0b4cb2440f1c	98.488	4233	22	33	1	4213	4289	79	0	7424
R8_p1-2	30fe3d34-65f2-4a0c-abc2-d202463fbcf9	98.533	4226	23	35	1	4213	5898	1699	0	7424
R8_p1-2	77f8c51b-579f-46d4-8300-037eec406b81	98.442	4236	24	34	1	4213	4864	648	0	7419
R8_p1-2	e3f1d25e-f1a7-45cf-999f-c1cf78650d67	98.488	4232	18	32	1	4213	8251	12455	0	7419
R8_p1-2	6562d7d0-b31a-4bb4-8828-d6ad13bde12e	98.531	4221	27	28	1	4213	10123	14316	0	7419
R8_p1-2	238d39a0-8b11-47da-93e5-e0f818d73c6f	98.487	4230	21	37	1	4213	14419	18622	0	7417
R8_p1-2	4ebb6534-0df6-47ec-8663-809eb15167de	98.463	4228	31	24	1	4213	34551	30343	0	7417
R8_p1-2	7831912f-c000-4f43-8d55-40b7f801ec63	99.106	4138	12	22	86	4213	23590	19468	0	7413
R8_p1-2	91039f95-b66e-43b4-9626-51af94f718bb	98.463	4229	26	34	1	4213	13314	9109	0	7413
R8_p1-2	de843a1a-c35a-47c5-9864-6e62f077a968	98.439	4228	32	29	1	4213	7269	11477	0	7411
R8_p1-2	41920090-53c8-4215-a47e-7218c1b5c5f6	98.463	4228	24	36	1	4213	1635	5836	0	7409
R8_p1-2	91c656fd-d4a3-4c47-9179-bd87b97f5730	98.417	4233	26	33	1	4213	9558	13769	0	7408
R8_p1-2	f60efce6-c9de-4852-aa1e-f699afda3bac	98.485	4225	20	32	1	4213	9576	5384	0	7408
R8_p1-2	0cfe7d51-ec92-4496-bebf-e33aed7c841e	98.415	4227	29	28	1	4213	890	5092	0	7400
R8_p1-2	4f03a176-27fe-407b-8623-c21ea30842ce	98.507	4220	15	30	1	4213	1894	6072	0	7400
R8_p1-2	9edbdcae-4c0b-4df2-9d71-fb7398e35e00	98.393	4231	26	33	1	4213	7944	12150	0	7398
R8_p1-2	04fc38cd-c6fa-4843-b2df-1cc05c36d1ec	98.438	4226	17	35	1	4213	20190	16001	0	7393
R8_p1-2	438fac6d-308b-4353-9265-46e6b017950e	98.368	4228	29	33	1	4213	19855	15653	0	7389
R8_p1-2	db4fc15b-94d8-42ca-a8e9-814f7a6f5f40	98.412	4218	35	23	1	4213	5957	10147	0	7389
R8_p1-2	1355c972-6e4b-460d-9879-965f84b99f25	98.437	4222	21	29	1	4213	2448	6633	0	7389
R8_p1-2	89a43b91-bc1a-43f9-b268-16563d3d3708	98.414	4225	21	29	1	4213	16705	12515	0	7389
R8_p1-2	88e64594-1bee-41dd-bd07-d07b134e9ecd	98.344	4227	32	29	1	4213	16495	20697	0	7384
R8_p1-2	9297d59c-40df-437b-a144-b2a9a6e70d10	98.344	4228	28	33	1	4213	14163	18363	0	7382
R8_p1-2	f25e2efa-d793-4719-afc9-44abd63dc2a1	98.366	4224	26	32	1	4213	337	4528	0	7378
R8_p1-2	957b0729-bfd3-4d15-8916-0a6d79e798b0	98.254	4239	28	36	1	4213	5560	9778	0	7376
R8_p1-2	afcecf98-6b35-4a06-ae02-f537df5b74c1	98.299	4233	26	33	1	4213	738	4944	0	7376
R8_p1-2	fb688f78-45f4-49d7-a33b-a221a57450ff	98.32	4227	29	29	1	4213	31241	27043	0	7374
R8_p1-2	4d5c5e54-d20b-4a4a-aa27-3252c7975a2d	98.366	4223	19	27	1	4213	23257	19075	0	7371
R8_p1-2	97a312d4-b2bd-43be-a097-275477a15599	98.229	4236	33	37	1	4213	3077	7293	0	7369
R8_p1-2	47fb96be-f2f9-4d55-b88d-998e36fd55b3	98.341	4219	27	27	1	4213	25732	21551	0	7363
R8_p1-2	36e7017d-57d1-42af-9af9-022c2720b9dc	98.273	4228	27	34	1	4213	719	4915	0	7361
R8_p1-2	8d883a4d-7a27-4956-8e67-ca41d8594699	98.295	4224	26	36	1	4213	975	5163	0	7360
R8_p1-2	cc5d1441-025b-4285-a7f8-c06b824685ac	98.251	4230	26	37	1	4213	29681	25483	0	7358
R8_p1-2	973a162c-ff57-4d1d-b462-342e12566559	98.184	4239	23	36	1	4213	17317	13107	0	7352
R8_p1-2	89452aa7-c416-487c-8018-8a35cf7f4b54	98.205	4233	26	39	1	4213	8965	13167	0	7350
R8_p1-2	02764f8f-4094-4367-9523-ae2af324862f	98.359	4206	29	31	1	4191	4181	1	0	7348
R8_p1-2	f4260e61-9de9-4bc7-bc84-c312e2d2d33a	98.205	4233	23	37	1	4213	27336	23137	0	7347
R8_p1-2	967dad6c-a832-4d9d-a329-878325f21e57	98.202	4226	32	32	1	4213	4690	496	0	7343
R8_p1-2	c941c9b9-9d82-454a-a004-7fb1a1fb00dc	98.201	4225	32	34	1	4213	4373	181	0	7341
R8_p1-2	59e95410-280d-49fa-8b23-081d963df00f	98.18	4230	29	35	1	4213	11812	7614	0	7341
R8_p1-2	d2a51b8d-6664-4ec8-a599-05e475c9c126	98.723	4149	20	24	1	4134	1885	6015	0	7337
R8_p1-2	fb0b9228-0606-41f8-8376-12193c1ffff6	98.135	4235	25	39	1	4213	163	4365	0	7334
R8_p1-2	6809e1d7-6116-4f18-90df-e46c1a6ee5bb	98.133	4232	29	36	1	4213	8337	12537	0	7332
R8_p1-2	d1969a6b-34df-426c-9cd7-11b1a02f124e	98.088	4237	29	41	1	4213	27471	23263	0	7328
R8_p1-2	962d838f-50ea-4838-879e-82bd8734e090	98.13	4225	38	35	1	4213	28251	32446	0	7326
R8_p1-2	ba938f07-d4f7-4ee2-864c-0699a99dda64	98.108	4229	28	34	1	4213	51	4243	0	7319
R8_p1-2	bb840901-6b58-462d-93b9-413db028b2bf	98.106	4223	30	38	1	4213	5237	1055	0	7310
R8_p1-2	981a8389-7e4c-483c-8f66-68aa7e6c45a9	97.952	4249	27	37	1	4213	9677	13901	0	7310
R8_p1-2	828d065c-f1dc-443f-b620-f7d7802c3e65	98.106	4223	28	36	1	4213	9761	5581	0	7308
R8_p1-2	0515e2d0-a989-4066-be36-da0b0fda0a9c	98.13	4224	20	30	1	4213	26281	30456	0	7308
R8_p1-2	d41f1e2c-4797-41a2-9904-3ce0ca22f1cd	98.037	4229	32	36	1	4213	600	4793	0	7302
R8_p1-2	a27f1f66-c260-4416-bfe3-d391263b5301	97.991	4231	39	40	1	4213	28517	24315	0	7300
R8_p1-2	f3fe5079-d580-4616-b2e4-f33cf1539b7f	98.013	4228	31	42	1	4213	17154	12965	0	7293
R8_p1-2	7eb42870-f056-4dc4-bd38-a21a52738117	97.99	4229	36	42	2	4213	8209	4013	0	7293
R8_p1-2	bc7c4dc1-2cc7-4f84-81a1-2db3bbfad73c	97.902	4243	26	46	1	4213	7930	3721	0	7284
R8_p1-2	7e40d1fa-e923-40b2-b15b-6aa8b05d38ec	97.97	4236	16	53	1	4213	15774	11586	0	7282
R8_p1-2	14d92825-e5c4-4ecc-af95-aefbeb769c57	97.919	4228	44	37	1	4213	5306	9504	0	7280
R8_p1-2	66e536c9-bfa0-4525-8086-83ff418f0710	98.01	4222	28	39	1	4213	8188	4014	0	7280
R8_p1-2	2b569192-562f-4808-b50a-7d5126ab9a87	97.964	4224	33	45	1	4213	7918	12099	0	7275
R8_p1-2	4681a6ce-6fe7-4420-b269-cad824b7dd35	97.874	4234	33	44	1	4213	8252	4055	0	7267
R8_p1-2	eb65085f-7ec2-4978-a7bf-caadad6fd164	97.827	4233	45	37	1	4213	3809	8014	0	7263
R8_p1-2	d87c7c1e-15ab-415b-81a4-d17ae8c140d1	97.851	4234	35	45	1	4213	11852	16050	0	7263
R8_p1-2	d0be7e15-db3d-4df2-b5ee-e310142d8a71	97.805	4236	43	41	1	4213	10095	14303	0	7262
R8_p1-2	aed09c33-aea8-4b4e-af66-6363b3dc31c2	97.847	4226	44	39	1	4213	19842	24033	0	7256
R8_p1-2	8ca6109a-0ced-4208-8ac0-410b02a45233	97.783	4240	31	43	1	4213	4510	8713	0	7251
R8_p1-2	5512a3a4-8578-4a95-a39a-967391d22ee1	97.824	4227	42	42	1	4213	1393	5583	0	7251
R8_p1-2	89b979ac-7a03-4197-b2d2-78196eb23cf1	97.844	4220	37	38	1	4213	5662	1490	0	7239
R8_p1-2	3734d598-b42e-4d67-98ad-f51dcb0bd71a	97.799	4225	40	38	1	4213	22049	17866	0	7238
R8_p1-2	276cf823-27f7-46ea-851d-546f18bd0884	97.798	4223	40	44	1	4213	5086	907	0	7234
R8_p1-2	9bb070bc-4a4a-40d9-a3db-5c04b6726123	97.736	4240	27	50	1	4213	18899	14702	0	7234
R8_p1-2	78f74a13-9014-4a90-afcf-8b24ab3f64bb	97.706	4228	43	46	1	4213	7341	11529	0	7221
R8_p1-2	81bddf6f-056b-4230-854e-1c018cd874bb	97.618	4240	42	50	1	4213	59697	55490	0	7215
R8_p1-2	be2150d2-40f9-4d56-9743-fa47e41203c9	97.62	4243	33	51	1	4213	13955	9751	0	7214
R8_p1-2	fabb947f-0e26-4947-a46d-2f4f4cf2213a	97.615	4234	42	46	1	4213	4632	8827	0	7204
R8_p1-2	4a419cd3-3bfb-4c92-bc62-3e0d7d7d8f46	97.703	4223	36	45	1	4213	11018	15189	0	7204
R8_p1-2	8cb99c6a-fcee-4e45-9b90-e6a9bce4c296	97.567	4234	49	43	1	4213	3873	8073	0	7199
R8_p1-2	24065ed0-1b09-4722-9040-e57babddcd29	97.613	4231	40	42	1	4213	4380	8567	0	7197
R8_p1-2	5b5d2318-544f-4ac9-8c2a-a96325192cfc	97.654	4220	39	48	1	4213	39489	43655	0	7190
R8_p1-2	9be28c30-0091-4b77-8b3d-ecedbb1242c1	97.541	4229	48	45	1	4213	133	4321	0	7182
R8_p1-2	2ba68ff7-0b60-4859-8b35-61353e2948e4	97.541	4230	45	51	1	4213	6385	10572	0	7180
R8_p1-2	54b6d597-7f9a-4733-85d9-e159523651ef	97.564	4229	35	46	1	4213	18994	14818	0	7177
R8_p1-2	92e076bf-3018-4f5a-a18e-51f9d400b9fa	97.518	4231	43	44	1	4213	6708	2522	0	7175
R8_p1-2	b8a8a43a-f323-4000-aa03-855720a951ee	97.448	4232	43	49	1	4213	5627	1442	0	7156
R8_p1-2	a31930e5-60b8-43ed-81d6-9d206f4b3b82	97.378	4234	50	51	1	4213	27576	31769	0	7147
R8_p1-2	9a2f88ec-d0f6-4df3-aedd-eea88d8dc690	97.313	4242	48	51	1	4213	1970	6174	0	7142
R8_p1-2	96595abc-169c-4d11-8003-d3950bf6bdd9	97.424	4231	34	44	1	4213	10975	6802	0	7140
R8_p1-2	29184004-5989-450e-9c2d-91a36d179c19	97.332	4235	46	54	1	4213	17955	13766	0	7132
R8_p1-2	bbc5065e-034c-419d-b7f7-f59857cac7e5	97.327	4228	56	43	1	4213	11285	15470	0	7129
R8_p1-2	aab6b188-c4c6-45dd-abc1-50dbf54bcf39	97.305	4230	56	48	1	4213	6669	10857	0	7127
R8_p1-2	67fd1f85-8d63-4b8b-b352-3499a2b45931	97.397	4226	28	60	1	4213	34966	30810	0	7119
[truncated: 4,212 more rows]

## Sheet: TableS10
Table S10. List of public data downloaded from GenBank for phylogenetic analysis.
Order	Species	Accession number
Celastrales	Euonymus chloranthoides	This research
Celastrales	Euonymus alatus	NC_053921.1
Celastrales	Tripterygium wilfordii	NC_082972.1
Celastrales	Parnassia rhombipetala	PX168804.1-PX168810.1
Celastrales	Parnassia faberi	PX171446.1-PX171456.1
Malpighiales	Banisteriopsis caapi	OR473419.1
Malpighiales	Bruguiera sexangula	NC_056359.1
Malpighiales	Bruguiera x rhynchopetala	NC_056360.1
Malpighiales	Calophyllum soulattri	NC_079842.1
Malpighiales	Excoecaria agallocha	PP905394.1
Malpighiales	Garcinia humilis	PP864382.1
Malpighiales	Garcinia mangostana	PP861184.1
Malpighiales	Hevea camargoana	NC_084327.1
Malpighiales	Hevea spruceana	NC_084328.1
Malpighiales	Jatropha curcas	NC_077559.1
Malpighiales	Kandelia obovata	NC_069222.1
Malpighiales	Manihot esculenta	NC_045136.1
Malpighiales	Passiflora edulis	NC_050950.1
Malpighiales	Populus alba	NC_041085.1
Malpighiales	Populus davidiana	NC_035157.1
Malpighiales	Ricinus communis	NC_015141.1
Malpighiales	Salix herbacea	PX251578.1
Malpighiales	Salix sinica	PX508937.1
Malpighiales	Viola diffusa	PP952082.1
Malpighiales	Viola odorata	PP908997.1
Zygophyllales	Tetraena mongolica	NC_086675.1
Zygophyllales	Tribulus terrestris	MK431825.1
