# Supplementary material
Source: Research Square preprint supplement (doi:10.21203/rs.3.rs-9546695/v1)

**Figure S1. Sequencing depth coverage of the *E. chloranthoides* chloroplast genome.**

The Illumina short reads were mapped to the assembled chloroplast genome, and the sequencing depth coverage profile was generated using qualimap (v.2.2.2-dev).


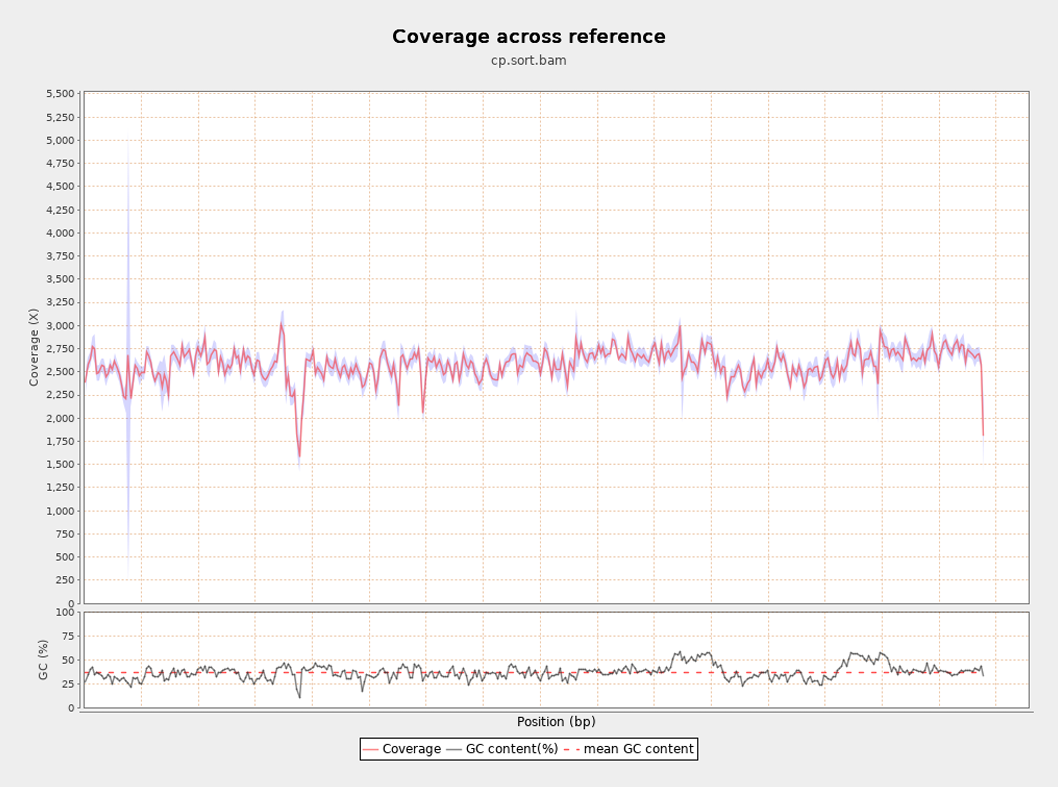


**Figure S2. Sequencing depth coverage of the *E. chloranthoides* mitochondrial genome.**

The Oxford Nanopore long-reads were mapped to the assembled mitochondrial genome, and the sequencing depth coverage profile was generated using qualimap (v.2.2.2-dev).

**A. Contig1 of the mitochondrial genome**


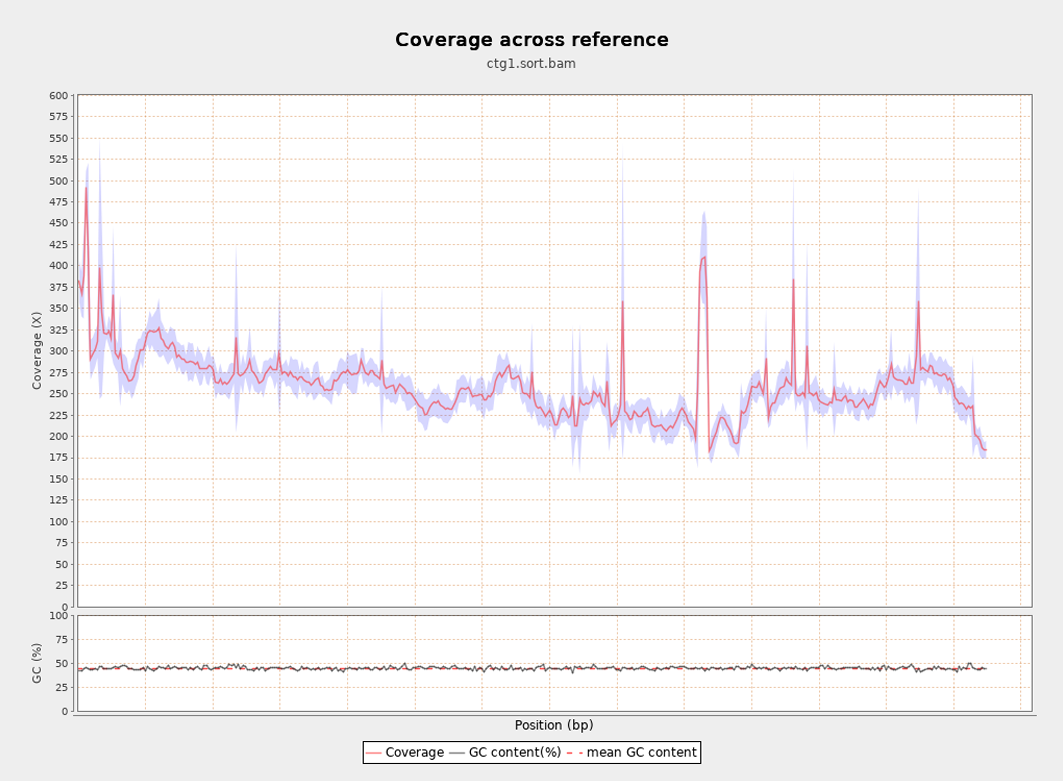


**B. Contig2 of the mitochondrial genome**


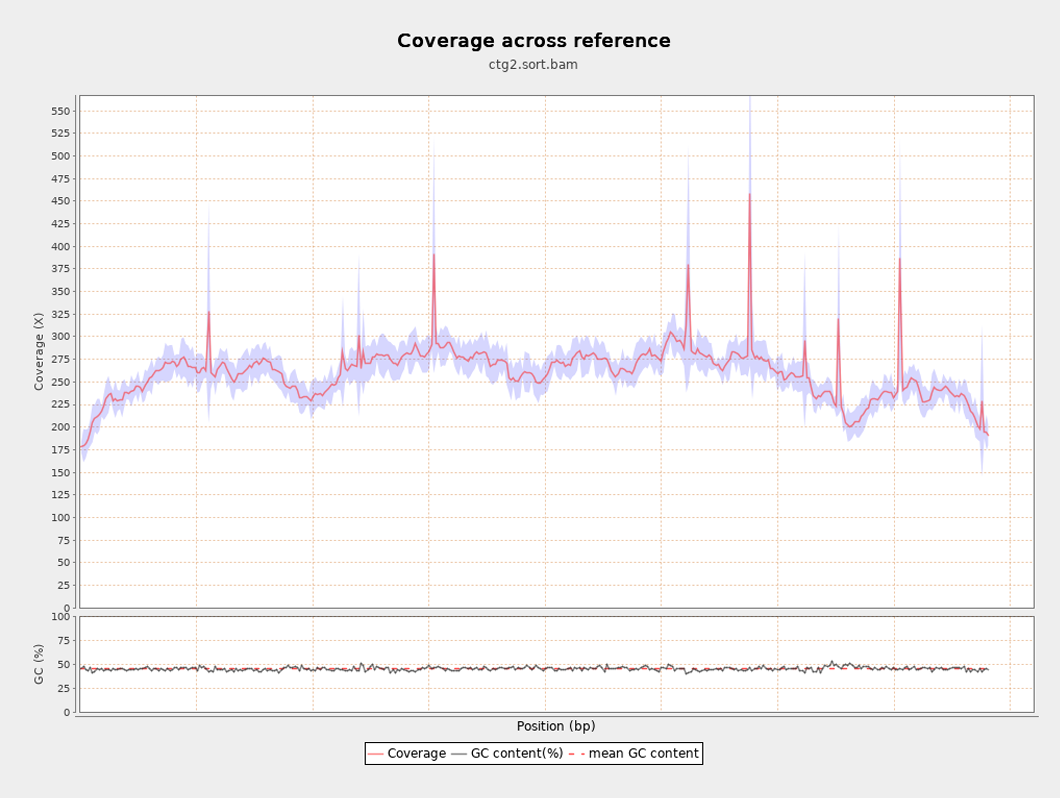


**C. Contig3 of the mitochondrial genome**


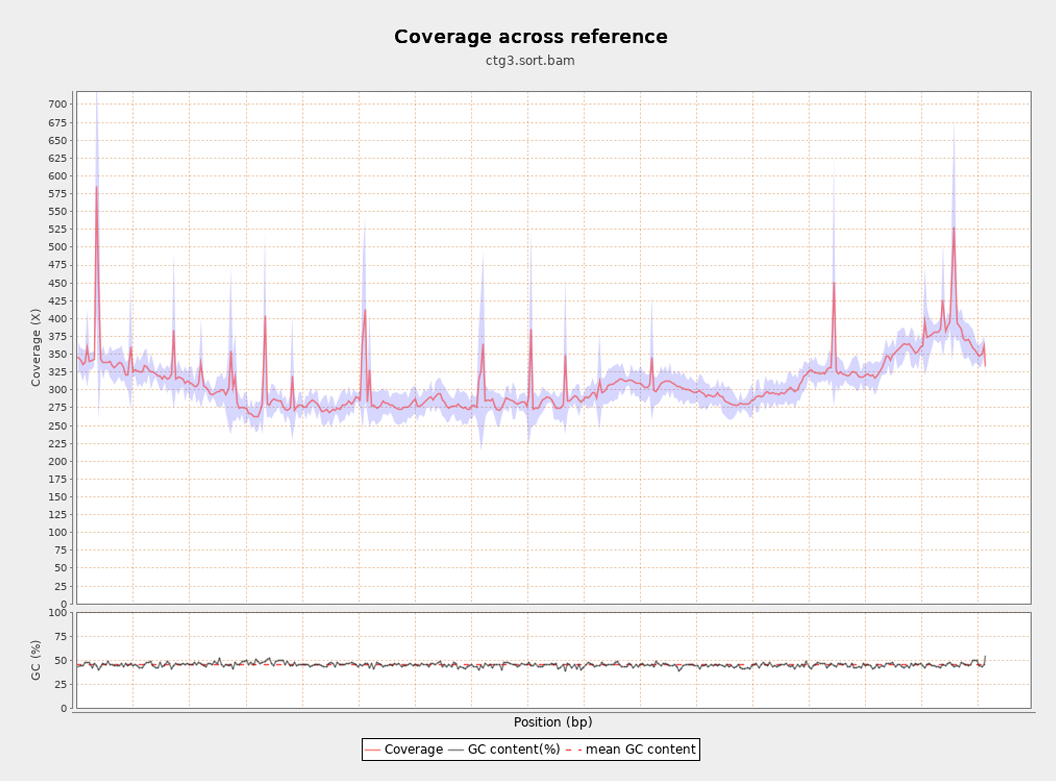


**D. Contig4 of the mitochondrial genome**


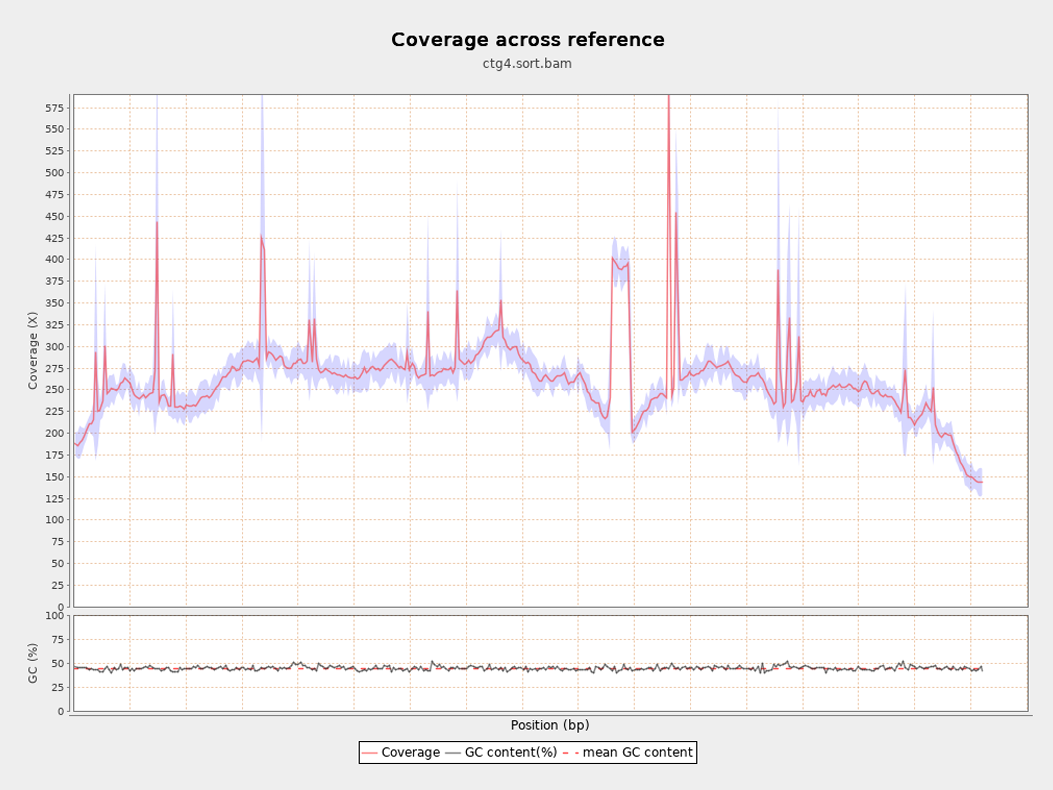


**E. Contig5 of the mitochondrial genome**


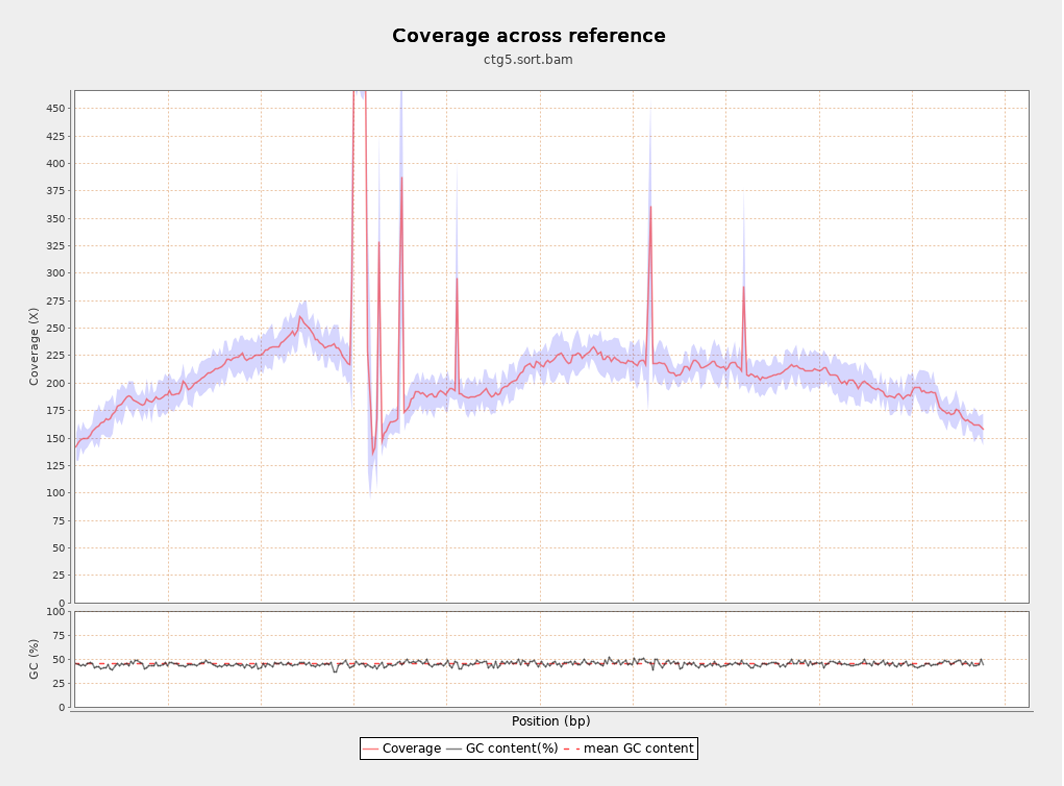


**F. Contig6 of the mitochondrial genome**


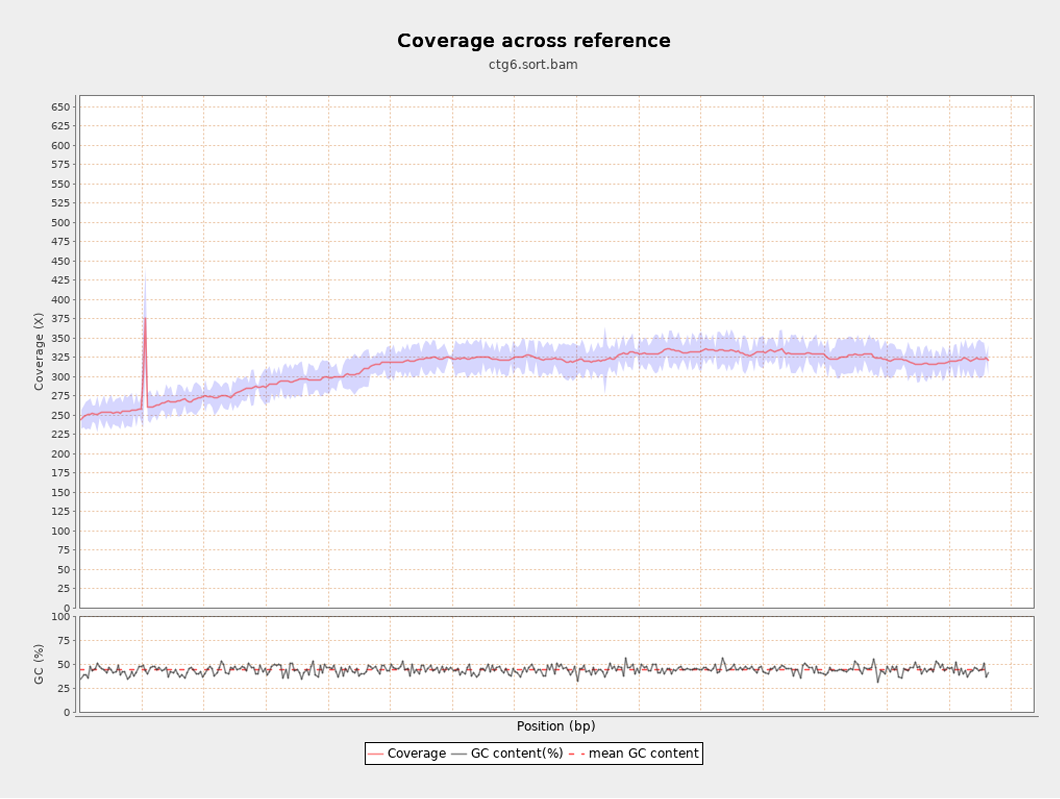

Supplement: Supplementary file 1 [file e2a38f82b8d1e6c9f352158b.docx]
